# Supplementary material for: Exploration of biomarkers of psoriasis through combined multiomics analysis
Source: Research Square preprint supplement (doi:10.21203/rs.3.rs-1507834/v1), 2022-04-06
Supplement: Supplementary file 1 [file 332d2011edce5b4250f8f079.xlsx]

## Sheet: GO
ID	Description	setSize	enrichmentScore	NES	pvalue	p.adjust	qvalues	rank	leading edge	core enrichment
GOBP	CYCLIC NUCLEOTIDE BIOSYNTHETIC PROCESS	22	-0.52847	-1.64569	0.011486	0.049976	0.034909	4263	tags=36%, list=20%, signal=29%	GUCY1B1/NPR1/ADCY6/NPR2/ADCY9/GUCY1A2/ADCY4/ADCY2
GOBP	POSITIVE REGULATION OF B CELL MEDIATED IMMUNITY	37	0.488978	1.62758	0.0114841	0.049976	0.034909	5845	tags=59%, list=28%, signal=43%	NOD2/EXOSC3/NSD2/MAD2L2/TFRC/HMCES/HLA-E/TNF/XCL1/NECTIN2/TNFSF13/PTPRC/CD28/CD40/TBX21/MLH1/KMT5C/CLCF1/LTA/TP53BP1/CD226/PAXIP1
GOBP	ALPHA AMINO ACID BIOSYNTHETIC PROCESS	63	0.411648	1.52509	0.01143	0.049797	0.034784	5787	tags=54%, list=28%, signal=39%	GOT2/GOT1/PSPH/AASS/SHMT2/MTHFD1/ASL/MTRR/ADI1/NAGS/GLUL/DHFR/PHGDH/PARK7/SERINC5/PSAT1/ILVBL/PLOD2/ASNS/MTHFR/CAD/AASDHPPT/ENOPH1/SLC25A12/ALDH18A1/PYCR1/MTHFD2L/PYCR3/CLN3/AGXT2/SDSL/SDS/APIP/SEPHS2
GOMF	PHOSPHATASE INHIBITOR ACTIVITY	45	-0.433883	-1.61307	0.0113808	0.0496147	0.0346567	2818	tags=29%, list=14%, signal=25%	TESC/ANP32E/SET/PPP1R1B/PPP1R14A/PTN/PPP1R1A/SH3RF2/PHACTR3/PPP1R36/PABIR1/PPP1R14C/LGALS3
GOBP	METANEPHROS MORPHOGENESIS	31	-0.482318	-1.64143	0.0113623	0.0495661	0.0346228	3438	tags=39%, list=16%, signal=32%	LGR4/FRAS1/BMP4/WNT7B/HES1/PDGFRB/SOX8/FMN1/LIF/GREM1/PKD2/PKD1
GOBP	SEMI LUNAR VALVE DEVELOPMENT	41	-0.44969	-1.62925	0.0113185	0.049407	0.0345116	4512	tags=39%, list=22%, signal=31%	HEY1/TGFB2/BMP2/ELN/BMP4/ROBO2/JAG1/SLIT2/EFNA1/TWIST1/SLIT3/ROCK2/RBPJ/NFATC1/NOTCH2/GATA3
GOBP	NON CANONICAL WNT SIGNALING PATHWAY	149	0.342412	1.44502	0.0113052	0.0493811	0.0344935	2155	tags=26%, list=10%, signal=23%	PSME2/PSMB2/WNT5A/PSMA5/PSMB5/FZD5/AP2S1/PSMA3/PSMD12/PSME4/PSMA2/PSME1/GRHL3/PSMB6/PSMB10/PSMB3/PSMD6/PSMB8/PSMC4/PSMA4/PSMD2/PSMD11/PSMD1/PSMD14/PSMC3/PSMB9/PSMA7/PSMD9/PSMD8/PSMA1/PSMD13/PSMF1/PSMC5/PSMC2/PSMB1/PSMC6/PSME3/PSMD7
GOBP	BLOOD VESSEL ENDOTHELIAL CELL MIGRATION	113	-0.328031	-1.43302	0.0112591	0.049212	0.0343754	4235	tags=40%, list=20%, signal=32%	KDR/MIA3/HDAC9/HDAC5/PRKD2/ANGPT1/SCARB1/MAP2K5/FOXC2/NRP1/VEGFC/EGR3/SIRT1/ABL1/SRPX2/JCAD/PRKD1/RGCC/TMSB4X/AMOT/STAT5A/CLEC14A/SLIT2/SPRED1/PRKCA/MMRN2/EFNA1/PPARG/ACVRL1/APOE/GREM1/MECP2/KLF4/FGFR1/MEF2C/AKT3/RHOJ/STARD13/MEOX2/ATP2B4/FBXW7/SP1/GATA2/MAP3K3/EFNB2
GOBP	POSITIVE REGULATION OF CELL GROWTH	152	0.325619	1.37546	0.0112046	0.0490057	0.0342313	3427	tags=26%, list=16%, signal=22%	S100A9/S100A8/CXCR4/CRABP2/EXOSC4/RAB11A/KRT17/SLC23A2/PRSS2/CXCL16/HBEGF/NCBP1/SFN/ADAM17/DBNL/RASAL1/SEMA7A/DNPH1/SLC25A33/RPS6KA1/CSNK2A1/CIB1/DERL2/DDX49/PLAA/ITSN2/EXOSC2/ADAM10/CEP43/KDM2B/NDEL1/EIF4G2/CYFIP1/FXN/EIF4G1/PSMD10/LPAR3/SEMA4D/CD38
GOBP	REGULATION OF CELL CYCLE CHECKPOINT	30	0.511937	1.61518	0.0111465	0.0487832	0.0340759	3136	tags=40%, list=15%, signal=34%	CCNB1/NDC80/MAD2L1/CDT1/GEN1/MAD2L1BP/WDR76/CHEK2/LCMT1/THOC5/FBXO4/RFWD3
GOMF	CYCLIC NUCLEOTIDE GATED ION CHANNEL ACTIVITY	10	-0.676937	-1.69542	0.0111061	0.0486381	0.0339745	838	tags=30%, list=4%, signal=29%	CNGA4/CNGA1/AQP1
GOBP	ACTIN FILAMENT REORGANIZATION	10	-0.676057	-1.69321	0.0111061	0.0486381	0.0339745	3727	tags=80%, list=18%, signal=66%	ARAP1/WHAMM/DMTN/NEDD9/MCU/EFS/GDPD2/GSN
GOBP	METENCEPHALON DEVELOPMENT	99	-0.334166	-1.44065	0.0109794	0.0481461	0.0336308	3432	tags=38%, list=16%, signal=32%	PTPN11/AGTPBP1/PAK1/FCGR2B/OPHN1/DLL1/ATP7A/SEMA4C/NCOA1/TTLL1/KAT2A/TRNP1/PTBP2/CNTN1/ABL1/ND4/CBLN1/COX1/ZNF365/EN1/GNPAT/LRP6/PTPRS/FOXC1/MECP2/SEC24B/PTN/PPARGC1A/HERC1/TTBK2/RERE/FZD4/CKB/LPAR1/SPTBN2/GLI2/BCL2/RORA
GOBP	BASEMENT MEMBRANE ASSEMBLY	15	-0.60587	-1.70569	0.0109366	0.0479894	0.0335214	4535	tags=67%, list=22%, signal=52%	NTNG2/PLOD3/PHLDB2/RAMP2/NTN4/CLASP1/LAMB2/PHLDB1/DAG1/LAMB4
GOMF	CYCLIN DEPENDENT PROTEIN SERINE THREONINE KINASE REGULATOR ACTIVITY	47	0.450156	1.57372	0.0109087	0.0478986	0.0334579	4080	tags=45%, list=20%, signal=36%	CCNB1/CCNB2/CKS2/CCNE1/CCNA2/CCNE2/CCNC/CCNF/CDKN1A/CKS1B/CCND2/CCNO/CCNQ/CDKN2A/CCNH/CASP3/CCND3/CDKN2D/CDK4/CCNYL1/CCNK
GOBP	POSITIVE REGULATION OF LEUKOCYTE APOPTOTIC PROCESS	24	0.545166	1.64272	0.0108821	0.0478129	0.0333981	3143	tags=54%, list=15%, signal=46%	CD274/WNT5A/PRELID1/IDO1/LYN/ZC3H8/LGALS9/ADAM8/PIK3CD/CCL5/CDKN2A/BAX/ANXA1
GOMF	CARBON NITROGEN LYASE ACTIVITY	13	0.643473	1.66717	0.010869	0.0477866	0.0333797	1143	tags=46%, list=5%, signal=44%	CHAC1/CHAC2/GGCT/ASL/HAL/ADSL
GOBP	MIRNA METABOLIC PROCESS	29	0.523507	1.64278	0.0108396	0.0476885	0.0333112	2357	tags=31%, list=11%, signal=28%	ZC3H12A/RAN/PNPT1/TARBP2/NFKB1/TUT7/HRAS/SND1/XPO5
GOBP	POSITIVE REGULATION OF INTRACELLULAR PROTEIN TRANSPORT	176	0.32916	1.40878	0.010776	0.0474399	0.0331375	3991	tags=34%, list=19%, signal=28%	ZC3H12A/RAN/TFDP1/GZMB/FZD5/NMT1/UBE2L3/YWHAQ/ZPR1/UBE2D3/SFN/ECT2/TMEM30B/IFNG/BCAP31/IL1B/UBL5/ATG13/BAG3/PDCD10/BID/CDK5/MTCL1/PDCD5/TCAF2/TMEM30A/EDEM1/RAC2/KIF20B/PLK3/ITGB2/CIB1/SAE1/HRAS/CASP8/TP63/TARDBP/YWHAZ/ARIH2/PIK3R2/EDEM2/UBE2J2/HCLS1/SREBF2/OAZ1/MFF/HTRA2/MIEF1/PRKCD/RIOK2/NUTF2/MAPK8/CEMIP/HDAC3/GSK3A/CACNB3/EMD/CDH1/JUP/MAPK14
GOBP	HISTONE PHOSPHORYLATION	39	0.465826	1.56253	0.0107626	0.0474117	0.0331179	3348	tags=38%, list=16%, signal=32%	CCNB1/CDK1/AURKB/MACROH2A1/AURKA/CCNA2/ZMPSTE24/IL1B/CDK5/RPS6KA4/HASPIN/VRK1/CDK2/CDK9/PRKCD
GOBP	LYMPH NODE DEVELOPMENT	17	0.597398	1.6669	0.0107533	0.0474021	0.0331111	3543	tags=47%, list=17%, signal=39%	POLB/LTB/SPNS2/IL7R/RIPK3/FADD/PDPN/IL15
GOBP	VASCULAR ASSOCIATED SMOOTH MUSCLE CELL DIFFERENTIATION	26	-0.499618	-1.6286	0.010698	0.0471892	0.0329624	3852	tags=46%, list=18%, signal=38%	RAMP2/GPER1/EFEMP2/HES1/FGF9/NFATC2/MYOCD/PDCD4/SGCB/NFATC1/EPC1/KIT
GOBP	MRNA 3 END PROCESSING	94	0.380889	1.49986	0.0106576	0.047042	0.0328596	3669	tags=36%, list=18%, signal=30%	CCNB1/EIF4A3/DDX39A/NCBP1/SRSF9/PNPT1/CPSF6/CPSF3/ALYREF/MAGOHB/CSTF2/SARNP/LEO1/SRSF2/POLR2D/SRSF7/SRSF1/GRSF1/THOC5/CLP1/PAF1/THOC6/THOC7/SNRPA/NELFE/CPSF4/SSU72/CSTF1/MAGOH/CDK9/WDR33/CTR9/CHTOP/CSTF3
GOBP	NEGATIVE REGULATION OF ANOIKIS	17	-0.580447	-1.6824	0.0106212	0.0469122	0.032769	3677	tags=59%, list=18%, signal=48%	PIK3CA/ITGA5/ZNF304/PTK2/ITGB1/NTRK2/PDK4/BCL2/CAV1/TLE1
GOBP	OSTEOBLAST DEVELOPMENT	16	-0.60736	-1.72459	0.0105466	0.0466133	0.0325601	4526	tags=56%, list=22%, signal=44%	HDAC4/LRP5L/LRP5/TNN/PTH1R/JUND/SATB2/SMAD3/GLI2
GOBP	REGULATION OF REACTIVE OXYGEN SPECIES METABOLIC PROCESS	177	0.316949	1.35787	0.0105373	0.0466028	0.0325528	4330	tags=35%, list=21%, signal=28%	ZC3H12A/GCH1/HK2/CLEC7A/FOXM1/TIGAR/STK17A/GSTP1/HIF1A/EIF6/RAB27A/DUOXA1/CFLAR/TUSC2/IFNG/ACE2/CLCN3/TRAP1/IL1B/ATG5/XDH/ROMO1/SLC25A33/CDKN1A/CD177/SOD2/SYK/DYNLL1/RAC2/RIPK3/CD36/ITGB2/GNAI3/CTNS/DHFR/VDAC1/BNIP3/GLA/PARK7/CYBA/BRCA1/BCO2/TNF/GADD45A/G6PD/TSPO/ICAM1/TYROBP/PRKCD/BECN1/P2RX4/PON3/HP/MTOR/IL10/MAPK14/PTX3/MPV17/MMP3/ARF4/PLIN5/DUOXA2
GOBP	CHAPERONE COFACTOR DEPENDENT PROTEIN REFOLDING	30	0.51495	1.62469	0.0105168	0.0465426	0.0325108	4203	tags=57%, list=20%, signal=45%	HSPA5/ERO1A/HSPA14/HSPA9/HSPE1/HSPA8/HSPH1/TOR1A/DNAJB1/SDF2L1/DNAJC7/TOR2A/PTGES3/TOR1B/DNAJB5/DNAJB12/SDF2
GOBP	POSITIVE REGULATION OF NATURAL KILLER CELL MEDIATED IMMUNITY	27	0.534742	1.66163	0.0105168	0.0465426	0.0325108	3933	tags=52%, list=19%, signal=42%	RAET1E/IL12B/RASGRP1/IL18RAP/SH2D1A/LAG3/HLA-E/NCR3/CRTAM/KLRD1/HLA-F/NECTIN2/HLA-G/VAV1
GOBP	POSITIVE REGULATION OF TELOMERE MAINTENANCE VIA TELOMERE LENGTHENING	35	0.481371	1.59414	0.0104882	0.0464773	0.0324651	2945	tags=43%, list=14%, signal=37%	PRKCQ/AURKB/CCT5/NEK2/CCT2/HNRNPA2B1/CCT3/CCT7/PNKP/XRCC5/TCP1/DKC1/FBXO4/CCT6A/CCT8
GOBP	METANEPHRIC NEPHRON MORPHOGENESIS	25	-0.518135	-1.67304	0.010473	0.0464409	0.0324397	3438	tags=40%, list=16%, signal=33%	LGR4/BMP4/HES1/PDGFRB/SOX8/FMN1/LIF/GREM1/PKD2/PKD1
GOCC	POLYSOMAL RIBOSOME	31	-0.48504	-1.65069	0.0104676	0.0464409	0.0324397	4610	tags=48%, list=22%, signal=38%	RPL19/NUFIP2/RPL24/RPL41/RPL32/RPL7A/RPL31/RPL18/RPL10A/RPL11/RPL8/RPS23/EIF3H/RPL38/RPL30
GOBP	REGULATION OF ATP METABOLIC PROCESS	114	0.351594	1.42916	0.010452	0.0464089	0.0324173	4881	tags=40%, list=23%, signal=31%	ENO1/PGAM1/PPIF/TIGAR/VCP/HIF1A/EIF6/SHMT2/NUP37/NUP210/NUP88/IFNG/COX7A2P2/SLC25A33/PDE12/UQCC2/NUP50/COX7A2/DNAJC15/RAE1/SEC13/ANTKMT/PFKFB2/NUP155/TREM2/NDC1/PARP1/PFKFB4/TSPO/NUP188/PRKAG1/BEND3/NUP85/NUP205/NUP58/NUP107/NUP93/DNAJC30/ATP5IF1/POM121/SLC25A12/NUP160/ZBTB7A/NUP35/NUP42/ENTPD5
GOBP	RESOLUTION OF MEIOTIC RECOMBINATION INTERMEDIATES	18	0.596912	1.69275	0.0104438	0.0464033	0.0324134	6026	tags=56%, list=29%, signal=40%	CENPX/TOP2A/SHOC1/CENPS/EME1/EME2/MLH1/TEX11/CORT/RMI1
GOBP	REGULATION OF NEUROTROPHIN TRK RECEPTOR SIGNALING PATHWAY	12	-0.645357	-1.70993	0.0104042	0.0462577	0.0323117	2962	tags=50%, list=14%, signal=43%	AGT/NTF3/ZDHHC17/TMEM108/SPRY1/SPRY2
GOBP	REGULATION OF B CELL MEDIATED IMMUNITY	53	0.4342	1.56324	0.0103983	0.0462577	0.0323117	6065	tags=57%, list=29%, signal=40%	NOD2/SUSD4/EXOSC3/NSD2/MAD2L2/TFRC/HMCES/HLA-E/TNF/XCL1/NECTIN2/IL10/FOXP3/PARP3/CR1/TNFSF13/PTPRC/CD28/CD40/TBX21/SLC15A4/C4BPA/MLH1/KMT5C/CLCF1/LTA/TP53BP1/CD226/PAXIP1/FOXJ1
GOBP	REGULATION OF LYMPHOCYTE APOPTOTIC PROCESS	53	0.434526	1.56441	0.0103983	0.0462577	0.0323117	3006	tags=40%, list=14%, signal=34%	CD274/WNT5A/PRELID1/PRKCQ/AURKB/HIF1A/IDO1/JAK3/LYN/ZC3H8/IL7R/RIPK3/LGALS9/CD27/DOCK8/NOC2L/CD3G/ADAM8/FADD/CCL5/BAX
GOCC	CELL CORTEX	293	-0.26425	-1.31162	0.010386	0.0462577	0.0323117	3272	tags=26%, list=16%, signal=22%	SPRR4/FGF1/MYRIP/CTTNBP2/SEPTIN2/PXN/WASHC1/KRT19/NDFIP1/CCN2/EXOC6B/LASP1/TRAK1/SEPTIN6/CLASP1/FRYL/PARD6G/ASPH/CLIC5/RHOBTB1/RAPGEF3/NEDD9/EEF1A1/CLDN5/FER/CRIP2/PLEKHH2/SEPTIN10/DSTN/EPB41L2/FNBP1L/PTK2/DST/FGFR2/AKAP12/SPTAN1/NUMA1/RHOB/SEPTIN7/SEPTIN11/PKD2/EPB41/PHLDB1/CALD1/SNCA/MLPH/AKAP13/PRKCB/SCIN/FERMT2/LAMC2/WDPCP/MKLN1/PAFAH1B1/TSC1/PARD3B/PARD3/EPS8/SPTBN2/MYH10/GNAI1/MYADM/ADD3/DL…
GOMF	NUCLEOSOMAL DNA BINDING	38	0.47446	1.5892	0.010385	0.0462577	0.0323117	6389	tags=58%, list=31%, signal=40%	HDAC1/MACROH2A1/H2AZ1/HNRNPC/RCC1/HMGN1/HDAC2/MBD2/SMARCA4/ACTL6A/H1-2/MBD3/H1-5/RBBP4/H1-3/H1-1/MTA2/HMGN2/ACTB/H1-9P/H1-4/H1-6
GOCC	AMINOACYL TRNA SYNTHETASE MULTIENZYME COMPLEX	11	0.673589	1.67162	0.0103819	0.0462577	0.0323117	1248	tags=55%, list=6%, signal=51%	MARS1/IARS1/AIMP1/EEF1E1/AIMP2/RARS1
GOCC	CILIARY TIP	47	-0.422541	-1.59346	0.0103271	0.0460979	0.0322002	5948	tags=60%, list=29%, signal=43%	KIF7/TTC30B/GLI1/KIF3C/IFT88/IFT81/CYLD/IFT140/KIF3A/IFT74/DYNC2LI1/IFT27/IFT172/IFT52/TTC21B/DYNC2H1/DYNC2I1/TRAF3IP1/DYNLL2/IFT22/CLUAP1/DYNLRB2/IFT122/WDR35/WDR19/GLI2/GLI3/DYNLRB1
GOMF	WNT ACTIVATED RECEPTOR ACTIVITY	15	-0.60812	-1.71202	0.0102583	0.0458215	0.032007	2825	tags=73%, list=14%, signal=63%	LRP5/FZD1/FZD3/ROR1/FZD10/FZD8/FZD7/RYK/LRP6/FZD4/PKD1
GOBP	POSITIVE REGULATION OF MYELOID LEUKOCYTE MEDIATED IMMUNITY	17	0.598899	1.67109	0.0102382	0.0457619	0.0319654	3330	tags=53%, list=16%, signal=45%	PTAFR/ARG1/CD177/ITGB2/HLA-E/DDX21/DDX58/TYROBP/STX4
GOBP	POSITIVE REGULATION OF PHAGOCYTOSIS	61	0.423995	1.55604	0.0101817	0.0455399	0.0318104	4673	tags=44%, list=22%, signal=34%	NOD2/CLEC7A/PYCARD/RAB27A/LMAN2/IFNG/RAB31/IL1B/CCL2/LYAR/CD36/IL2RG/C2/SIRPG/CYBA/SFTPD/TNF/TREM2/IL15/DOCK2/PTX3/IL15RA/CD300LF/ABCA7/PTPRC/DNM2/FCER1G
GOBP	MEMBRANE LIPID METABOLIC PROCESS	204	0.314357	1.37174	0.0101686	0.0455113	0.0317904	4131	tags=33%, list=20%, signal=27%	GM2A/SPTSSA/CERS3/FUT3/SPTLC2/FUT2/ORMDL2/PPP2CA/SMPD3/ALOX12B/VAPA/CWH43/B3GNT5/PIGA/ELOVL7/CYP4F22/GBA2/GLTP/PIGW/SPNS2/PIGX/PIGO/NAGA/ALDH3B2/SMPD1/CSNK1G2/HACD1/CTSA/SERINC2/SMPD2/GLA/ARV1/ST8SIA4/SAMD8/TNFRSF1A/ARSA/SGPP2/DPM2/PIGB/MGST2/TNF/NEU2/STS/UGCG/CPTP/BAX/SERINC5/HTRA2/ELOVL4/ESYT3/AGK/PIGL/CLN6/DPM1/PRKCD/PPP2R1A/SPTLC1/SPTLC3/ST3GAL4/ELOVL1/PIGU/SPHK1/ACER3/PIGF/NEU1/PIGN/PLPP2
GOMF	2 IRON 2 SULFUR CLUSTER BINDING	21	0.569822	1.66071	0.0101445	0.0454339	0.0317363	4677	tags=62%, list=22%, signal=48%	CIAPIN1/UQCRFS1/SDHB/NDUFV2/XDH/CISD3/GLRX2/FECH/CISD1/FXN/NDUFS1/CISD2/FDX2
GOBP	GLOMERULAR EPITHELIAL CELL DEVELOPMENT	13	-0.653969	-1.78084	0.010135	0.0454213	0.0317275	3069	tags=69%, list=15%, signal=59%	BMP4/JAG1/ASXL1/ADIPOQ/PODXL/LAMB2/IQGAP1/MAGI2/NOTCH2
GOBP	REGULATION OF DENDRITIC CELL DIFFERENTIATION	12	0.658722	1.66981	0.0101323	0.0454213	0.0317275	4776	tags=75%, list=23%, signal=58%	CEBPB/LGALS9/LILRB2/TMEM176B/HLA-B/LILRB1/HLA-G/AGER/TMEM176A
GOCC	UBIQUITIN LIGASE COMPLEX	283	0.299078	1.34904	0.0101217	0.0454213	0.0317275	4277	tags=34%, list=20%, signal=27%	CDC20/DCUN1D5/UBE2C/UBE2L6/UBE2N/BUB1B/CKS2/KCTD5/TNFAIP1/UBE2L3/FBXO6/FBXO45/MAEA/ELOC/DCAF13/DTL/TSPAN17/ELOB/UBE2S/ANAPC7/FBXO9/FBXW11/CCNF/CBX2/RNF11/SKP2/TRIM21/UBE2D1/UBXN8/KBTBD8/RBX1/UBE2A/GLMN/DCAF11/PDCD6/CKS1B/DCAF12/COMMD1/MAD2L2/TRPC4AP/DERL2/RNF168/TRAF7/UBE3D/ATG3/IKBKG/AUP1/CUL1/BRCC3/FBXL19/SUGT1/FBXW5/BABAM2/FBXO25/ANAPC11/RAD18/RANBP9/RNF7/ARIH2/UBE2D2/MED31/DMAC2/FBXO10/RANBP1…
GOBP	POSITIVE REGULATION OF RNA POLYMERASE II TRANSCRIPTION PREINITIATION COMPLEX ASSEMBLY	10	0.692311	1.67187	0.0101143	0.0454198	0.0317265	3132	tags=60%, list=15%, signal=51%	PSMC4/PSMC3/PSMC5/PSMC2/PSMC6/CAND1
GOBP	REGULATION OF FIBROBLAST MIGRATION	34	-0.482396	-1.68248	0.0100059	0.0449632	0.0314075	4046	tags=44%, list=19%, signal=36%	APPL1/DMTN/PRKCE/GNA12/DDR2/MACIR/FER/PTK2/AKAP12/ITGB1/SLC8A1/SDC4/WDPCP/PAK3/ARHGEF7
GOBP	MUSCLE CELL PROLIFERATION	176	-0.293996	-1.37761	0.0100008	0.0449632	0.0314075	4184	tags=38%, list=20%, signal=31%	S1PR1/CTNNB1/VIP/CCN4/PDE1A/TGFB2/KCNK2/MMP2/ELN/ANGPT1/GPER1/MSTN/SIX5/EFEMP2/SAV1/PTEN/FOXC2/VGLL4/NPR1/IL18/ERBB4/BMP4/JARID2/PDGFRB/OGN/YAP1/EDN1/NOG/ADIPOQ/CCN3/APOD/FGF9/PPARG/EGFR/NPY5R/ABCC4/FOXC1/HPGD/FGFR2/KLF4/BMPR1A/PDGFD/DIPK2A/MEF2C/RBP4/PPARGC1A/IGFBP5/CDKN1B/MYOCD/MEF2D/WNT2/RBPMS2/PRKG1/RBPJ/MAPK1/TGFBR2/ZFPM2/EPHB1/PDCD4/CNN1/FOXJ2/TCF7L2/CTNNBIP1/TPM1/MEIS1/TGFBR3/ANG
GOBP	NEUTRAL AMINO ACID TRANSPORT	42	0.474513	1.6197	0.00995229	0.044782	0.0312809	5592	tags=62%, list=27%, signal=45%	SLC6A14/SFXN1/SLC7A5/ACE2/SLC38A5/NFKBIE/SLC36A1/SFXN2/SLC6A15/SLC3A2/CTNS/SLC38A9/SLC38A7/SLC6A20/SLC36A4/SLC43A2/SLC1A1/SLC1A5/SLC1A4/LLGL2/SLC6A19/SLC6A6/SLC38A6/SLC7A8/RGS4/SLC6A17
GOBP	RECEPTOR SIGNALING PATHWAY VIA STAT	160	0.339467	1.44647	0.00994215	0.0447663	0.03127	4913	tags=38%, list=24%, signal=29%	STAT1/NMI/PARP9/SOCS3/PPP2CA/IL20/PTPN2/BCL3/PARP14/STAT3/JAK3/IFNG/IL26/CCL2/LYN/CDK5/SOCS1/ADIPOR1/IL12B/STAP2/IL7R/CRLF3/IL6/STAMBP/IL24/IL23A/STAT2/PTK6/TSLP/TNFRSF1A/DOT1L/HCLS1/CCL5/HDAC2/TNF/OCIAD2/GADD45A/IFNAR2/CCR2/CTR9/PPP2R1A/IL15/IL10RA/PIGU/CD300A/IL10/CRLF2/EPO/PWP1/PTPRC/PRL/MGAT5/PTPRD/SH2B3/CD40/IL10RB/IFNE/NF2/IFNA2/HGS
GOBP	POSITIVE REGULATION OF HUMORAL IMMUNE RESPONSE	19	0.59208	1.70059	0.00990379	0.0446235	0.0311703	4406	tags=47%, list=21%, signal=37%	NOD2/CCR7/PHB/IL1B/KLK7/TNF/IL17F/CR1/PTPRC
GOBP	VENTRAL SPINAL CORD INTERNEURON DIFFERENTIATION	12	-0.646759	-1.71365	0.00989668	0.0446214	0.0311688	2742	tags=33%, list=13%, signal=29%	LMO4/GATA2/GLI2/GLI3
GOBP	REGULATION OF TRANSPORTER ACTIVITY	267	-0.260007	-1.26967	0.00989192	0.0446214	0.0311688	5098	tags=35%, list=24%, signal=27%	FGF12/ATP1B2/STRIT1/ANO9/UBQLN1/KCNIP2/HRC/GSTM2/GRIA2/CTTNBP2NL/CAMK2D/ATP7A/FGF11/ACTN4/CASQ1/SCN1B/AKAP6/SLN/PDZK1/STAC2/CHRM3/RGN/CFTR/TRPC6/ABCB1/RASGRF2/AMIGO1/DAPK1/THADA/VAMP2/PTEN/NEDD4L/NOS1/SHANK2/PRKCE/KLHL24/PTPN3/RELN/KCTD7/TCAF1/PM20D1/CALM2/ALG10B/DLG1/APP/KCNAB1/NDFIP1/GAL/CLTRN/TMSB4X/HECW2/TESC/GOPC/CRACR2A/WNK1/ADIPOQ/NLGN1/CACNB2/TWIST1/FXYD1/FGF13/PPARG/JPH2/SHANK3/ANK2/ITGB…
GOMF	MICROTUBULE BINDING	265	0.298793	1.33614	0.00988907	0.0446214	0.0311688	2964	tags=23%, list=14%, signal=20%	GJB6/S100A9/S100A8/DLGAP5/KIF20A/BIRC5/NUSAP1/KIF2C/KIF18B/MX1/PRC1/KATNB1/KIF4A/TPX2/SPAG5/RAB11A/POLB/KIF2A/KIF11/CRIPT/KIF14/CENPF/CENPE/VAPA/KIF23/SKA2/SKA1/FAM83D/FBXW11/RACGAP1/RGS14/GAPDH/ZNF207/MX2/KIF15/RMDN1/CKAP5/KIF18A/MTCL1/PSRC1/PLK1/RMDN2/KIF20B/NDE1/RCC2/CETN2/REEP4/HOOK1/RAE1/KIF22/MID1/EML6/NDEL1/MAP6D1/KIFC1/MAPRE1/DRG1/CAMSAP1/KIF1B/KIF21B
GOMF	INTRAMOLECULAR OXIDOREDUCTASE ACTIVITY	47	0.453196	1.58434	0.0098587	0.0445398	0.0311118	2526	tags=36%, list=12%, signal=32%	TPI1/ERP44/ERO1A/MIF/P4HB/EBPL/GPI/CYP2S1/EBP/CRELD2/GLRX2/MPI/PTGES2/PDIA4/PDIA6/GNPDA1/QSOX1
GOBP	REGULATION OF RAS PROTEIN SIGNAL TRANSDUCTION	188	-0.284962	-1.34379	0.00979947	0.044302	0.0309457	3710	tags=29%, list=18%, signal=24%	SQSTM1/LPAR4/ALS2/ARHGEF2/MADD/RDX/NRP1/PPP2CB/IQSEC1/RABL3/ABL1/DENND3/RASA4/PDGFRB/KITLG/SHOC2/ARHGAP24/RTN4R/RASA3/CYTH3/NET1/ERBIN/F2R/FBXO8/AUTS2/MET/APOE/OGT/ARHGAP35/ITPKB/PIK3CB/ARHGAP42/STMN3/SCAI/STARD13/AKAP13/ADRA1A/TIMP2/MYOC/RALGPS1/BCL6/LPAR1/EPS8/ARFGEF3/SPRY1/DLC1/NOTCH2/SPRY2/ARHGEF28/ARHGEF10/KANK1/IRS2/KANK2/DENND4C
GOBP	REGULATION OF HEART GROWTH	61	-0.3864	-1.51042	0.00975432	0.0441276	0.0308239	4567	tags=41%, list=22%, signal=32%	AKAP6/PI16/KCNK2/PARP2/SAV1/PTEN/VGLL4/ERBB4/JARID2/RGS2/YAP1/EDN1/NOG/FGFR2/BMPR1A/PPARA/MEF2C/RBP4/WNT2/RBPJ/MAPK1/TGFBR2/ZFPM2/MEIS1/TGFBR3
GOBP	POLYOL METABOLIC PROCESS	125	0.351797	1.4537	0.00972559	0.0440273	0.0307538	4351	tags=38%, list=21%, signal=30%	TPI1/GCH1/PTS/GOT1/GK/PTAFR/SPTLC2/IPPK/PLCG2/PLCD1/CYP27B1/ITPKC/IMPA2/INPP1/COQ2/GALK1/PCK2/COQ3/MTMR2/DHFR/PLEK/MINPP1/BPNT1/PLCD4/P2RY1/SGPP2/SYNJ2/AGK/P2RY6/PGP/SPTLC1/SPTLC3/GALR2/PLCB3/CD244/PPIP5K1/CYP2R1/AVPR1B/SPHK1/NTSR1/ACER3/PLD4/PLPP2/SPR/GK2/HRH1/ASAH2B
GOBP	SPINDLE LOCALIZATION	53	0.437087	1.57363	0.00971647	0.0440157	0.0307456	3542	tags=40%, list=17%, signal=33%	NDC80/NUSAP1/MAD2L1/ASPM/DYNLT1/CENPA/FBXW11/ACTR3/ESPL1/PLK1/NDE1/WASL/KPNB1/NDEL1/NSFL1C/GPSM2/CFL1/MYH9/SAPCD2/SPDL1/HTT
GOBP	DNA REPLICATION DEPENDENT NUCLEOSOME ORGANIZATION	26	0.543002	1.66376	0.0096843	0.0438995	0.0306645	7159	tags=77%, list=34%, signal=51%	ASF1B/IPO4/HAT1/NASP/H3C10/CHAF1A/CHAF1B/H3C7/H3C8/H4C4/H4C9/RBBP4/H4C2/H4C5/H3C2/H4C1/H3C11/H3C1/H3C3/H3C12
GOBP	POSITIVE REGULATION OF LYMPHOCYTE CHEMOTAXIS	18	0.600652	1.70335	0.0096843	0.0438995	0.0306645	3616	tags=67%, list=17%, signal=55%	WNT5A/S100A7/CXCL13/CCL4/ADAM17/CCL7/OXSR1/ADAM10/CCL5/XCL1/CCR2/TMEM102
GOBP	NON MOTILE CILIUM ASSEMBLY	53	-0.411324	-1.57342	0.00965902	0.0438441	0.0306258	5650	tags=60%, list=27%, signal=44%	IFT80/BBS4/TMEM107/RPGRIP1L/ARL13B/CEP135/INTU/IFT88/CEP250/IFT140/TMEM216/TTC8/TBC1D32/TOGARAM1/BBS7/IFT74/C2CD3/IFT172/IFT52/CEP350/DYNC2H1/TMEM80/BBS10/CSNK1D/PIBF1/SEPTIN7/BBS1/PCM1/IFT122/CEP126/BBS2/MAP4
GOBP	POSITIVE REGULATION OF TRANSMEMBRANE RECEPTOR PROTEIN SERINE THREONINE KINASE SIGNALING PATHWAY	101	-0.338062	-1.45629	0.00959547	0.0435851	0.0304449	5601	tags=42%, list=27%, signal=31%	SMAD2/GDF15/RNF111/ACVR2A/GDF10/FLCN/EP300/SMAD4/CDH5/GDF9/MSX1/TGFB2/ACVR2B/BMP2/BMP6/MSTN/SLC2A10/BMP4/DAB2/HES1/SNW1/ACVRL1/RBPMS/CREBBP/NUMA1/BMPR1A/GDF7/GPC3/NEO1/SDCBP/MYOCD/TGFB1I1/RBPJ/BMP7/FOXD1/ELAPOR2/CDKN1C/ACVR1B/ZNF423/INHBB/NOTCH2/TGFBR3
GOBP	REGULATION OF SNARE COMPLEX ASSEMBLY	10	-0.682466	-1.70927	0.00958011	0.0435448	0.0304167	4098	tags=70%, list=20%, signal=56%	TRIM9/ANKRD27/CLTRN/PRRT2/VPS11/SNCA/STXBP6
GOBP	SULFUR COMPOUND METABOLIC PROCESS	352	0.289136	1.32608	0.00955925	0.0434794	0.030371	4833	tags=34%, list=23%, signal=26%	KYNU/SQOR/ETHE1/SLC7A11/GLRX3/CHAC1/HYAL4/CIAPIN1/ACOT7/AHCY/CHAC2/GSTP1/GSTO1/CNDP2/ACP3/CIAO2A/AASS/DBI/HSPA9/PDZD11/GSTA4/MTHFD1/ELOVL7/GGCT/NUBP1/SPOCK2/SLC5A6/DGAT1/SLC25A10/HS3ST3B1/TDO2/MTRR/CIAO2B/GPX1/ADI1/PPT2/HSD17B4/GCLM/GLRX2/SULT2B1/NDOR1/ACOT11/CTNS/PTGES2/TST/HACD1/GDAP1/GSTZ1/TPST2/B3GALT6/BPNT1/ACOT13/NUBP2/SULT1E1/CHST1/TXN2/PHGDH/PCCB/CHST11/PARK7/SLC25A19/EXT1/ACACA/AMD1/MGST…
GOMF	ENDONUCLEASE ACTIVITY ACTIVE WITH EITHER RIBO OR DEOXYRIBONUCLEIC ACIDS AND PRODUCING 5 PHOSPHOMONOESTERS	38	0.477159	1.59824	0.00954463	0.0434423	0.0303452	4614	tags=47%, list=22%, signal=37%	RNASEH2A/FEN1/DNASE1L3/EXO1/ELAC2/DNA2/GEN1/RPP40/POP5/POP4/POP1/MRPL44/DNASE1L1/POP7/RPP30/RPP38/DNASE1L2/ENDOV
GOBP	FOREBRAIN CELL MIGRATION	52	-0.410269	-1.56328	0.00952182	0.0433678	0.0302931	2922	tags=37%, list=14%, signal=31%	RELN/CXCL12/NRG3/LRRK2/SLIT2/SUN2/FGF13/SYNE2/BMERB1/POU3F3/ZMIZ1/RTN4/PAFAH1B1/DIXDC1/EFHC1/AXL/GLI3/SRGAP2/EMX2
GOBP	POSITIVE REGULATION OF INTERFERON ALPHA PRODUCTION	22	0.557954	1.65167	0.00949572	0.0432783	0.0302306	3140	tags=41%, list=15%, signal=35%	IRF7/STAT1/IFIH1/MMP12/TBK1/HSPD1/TLR8/DDX58/CHUK
GOBP	TETRAPYRROLE METABOLIC PROCESS	60	0.42129	1.542	0.00947682	0.0432215	0.0301909	3160	tags=32%, list=15%, signal=27%	TCN1/HMOX2/ABCC1/SRRD/PRSS3/ALAS1/ABCB6/HMBS/HMOX1/MTRR/FECH/MMADHC/COX10/SLC25A39/MMAB/UROS/FXN/MMAA/TSPO
GOCC	SPECIFIC GRANULE MEMBRANE	89	0.376972	1.47155	0.00947472	0.0432215	0.0301909	3244	tags=33%, list=16%, signal=28%	HMOX2/CKAP4/DNAJC5/CD53/RAP2B/LAMTOR2/DGAT1/CD177/TMEM30A/ATP6V1D/PLAU/CD36/ITGB2/SLC44A2/PLAUR/VAMP8/ADAM10/ITGAL/GPR84/ADAM8/TNFRSF1B/SLC2A3/SLC2A5/CYBA/CMTM6/TOM1/KCNAB2/MMP25/LAMTOR3
GOBP	INTRACILIARY TRANSPORT INVOLVED IN CILIUM ASSEMBLY	40	-0.45506	-1.65081	0.00945683	0.043189	0.0301682	5820	tags=68%, list=28%, signal=49%	TNPO1/TTC30B/KIF3C/IFT88/IFT81/TRIP11/IFT140/KIF3A/KIF17/IFT74/DYNC2LI1/IFT27/IFT172/IFT52/TTC21B/DYNC2H1/DYNC2I1/TRAF3IP1/DYNLL2/IFT22/CLUAP1/DYNLRB2/PCM1/IFT122/WDR35/WDR19/DYNLRB1
GOBP	REGULATION OF SYNAPSE ASSEMBLY	88	-0.352784	-1.50449	0.00941842	0.0430428	0.0300661	5104	tags=40%, list=24%, signal=30%	AMIGO2/LRRTM2/SLITRK5/EPHB3/LRRTM1/CUX2/NRXN1/FLRT2/AMIGO1/LINGO2/SLITRK2/APP/SRPX2/ROBO2/CBLN1/SETD5/PDLIM5/SLITRK4/CLSTN1/BHLHB9/LRRN1/NLGN1/GPC4/PTPRS/GPC6/NTRK2/MEF2C/SNCA/NTN1/CLSTN2/LRFN5/DLG5/EPHB1/SLITRK6/EEF2K
GOMF	I SMAD BINDING	14	-0.623129	-1.72243	0.00938917	0.0429384	0.0299931	5601	tags=86%, list=27%, signal=63%	AXIN1/SMAD1/SMAD7/SMAD2/SMAD4/CTNNB1/SMURF1/SMAD9/SMAD5/SMAD3/TGFB1I1/AXIN2
GOBP	NEGATIVE REGULATION OF CELL ADHESION MEDIATED BY INTEGRIN	12	-0.649469	-1.72083	0.00938917	0.0429384	0.0299931	4239	tags=67%, list=20%, signal=53%	PTPN11/ACER2/MUC1/CYP1B1/SWAP70/WNK1/NEXMIF/JAM3
GOBP	ESTABLISHMENT OF PIGMENT GRANULE LOCALIZATION	23	0.55746	1.65456	0.00935291	0.0428308	0.029918	1558	tags=39%, list=7%, signal=36%	CDH3/MREG/RAB11A/RAB27A/SHROOM2/MKKS/RAB1A/GPR143/MYO5A
GOBP	REGULATION OF GLUCOSE TRANSMEMBRANE TRANSPORT	70	-0.375894	-1.5192	0.00933703	0.0427873	0.0298876	3484	tags=34%, list=17%, signal=29%	C2CD5/RAP1A/C3/ENPP1/INSR/LEP/EDN1/ADIPOQ/RHOQ/PRKAG2/CLIP3/SLC25A27/GPC3/OSBPL8/PRKCB/BRAF/PID1/KLF15/IRS1/PIK3R1/CREBL2/SORBS1/IRS2/MEF2A
GOMF	G PROTEIN COUPLED CHEMOATTRACTANT RECEPTOR ACTIVITY	26	0.545954	1.6728	0.00930453	0.0426675	0.0298039	6134	tags=58%, list=29%, signal=41%	CXCR2/CXCR4/CCR7/CXCR6/CCR5/ACKR2/CCR1/CCRL2/CCR2/CXCR1/CXCR3/CCR4/CXCR5/CX3CR1/XCR1
GOBP	REGULATION OF DOUBLE STRAND BREAK REPAIR	83	0.393307	1.51541	0.00930451	0.0426675	0.0298039	4190	tags=40%, list=20%, signal=32%	PARP9/FOXM1/TIMELESS/DTX3L/TRIP12/RAD51/PPP4C/PARPBP/OTUB2/PPP4R2/AUNIP/RAD51AP1/SIRT7/PNKP/FIGNL1/CGAS/NSD2/POLQ/MAD2L2/PRKDC/PML/SIRT6/PARP1/UBQLN4/CYREN/KDM1A/RMI2/WAS/OTUB1/TFIP11/PARP3/SLF1/WRAP53
GOBP	ICOSANOID SECRETION	41	0.474191	1.61412	0.00928991	0.0426587	0.0297978	5702	tags=54%, list=27%, signal=39%	PLA2G3/PLA2G2F/IL1B/NOS2/SYK/BDKRB2/MAP2K6/PLA2G12A/ANXA1/PTGES/PNPLA8/P2RX4/AVPR1B/PLA2G2A/NTSR1/CYP4F2/PLA2G4F/DRD4/NMB/DRD2/TNFRSF11A/SSTR4
GOBP	MULTIVESICULAR BODY ORGANIZATION	30	0.52014	1.64106	0.0092573	0.042538	0.0297135	3946	tags=50%, list=19%, signal=41%	RAB11A/RAB27A/VPS25/STAM/VTA1/VPS37A/SNF8/PDCD6IP/VPS37B/CHMP5/CHMP1B/CHMP6/MVB12A/CHMP1A/CHMP2A
GOCC	NUCLEAR EXOSOME RNASE COMPLEX	16	0.62548	1.73201	0.00925599	0.042538	0.0297135	3564	tags=56%, list=17%, signal=47%	MPHOSPH6/EXOSC4/EXOSC3/DIS3/EXOSC1/WDR74/EXOSC2/EXOSC5/EXOSC8
GOBP	BASE EXCISION REPAIR	39	0.4717	1.58223	0.0091993	0.0423294	0.0295678	5193	tags=49%, list=25%, signal=37%	PCNA/POLB/RPA3/FEN1/TDG/APEX2/DNA2/PRMT6/SMUG1/POLQ/NEIL3/MPG/RPA1/POLD1/NTHL1/POLG/LIG1/APEX1/ERCC6
GOBP	POSITIVE REGULATION OF CELLULAR RESPONSE TO INSULIN STIMULUS	23	-0.523906	-1.65344	0.00919513	0.0423294	0.0295678	5586	tags=61%, list=27%, signal=45%	PTPN11/PAK1/OPA1/MYO1C/ECHDC3/NUCKS1/SORL1/SIRT1/LEP/OSBPL8/GKAP1/IRS1/SORBS1/SERPINA12
GOBP	REGULATION OF T CELL RECEPTOR SIGNALING PATHWAY	40	0.472991	1.59637	0.00918599	0.0423261	0.0295655	4438	tags=48%, list=21%, signal=37%	CCR7/GBP1/PTPN2/LCK/PVRIG/PTPN22/SH2D1A/LILRB4/LAPTM5/SLA2/PHPT1/UBASH3A/BCL10/CARD11/NECTIN2/CD300A/THY1/RAB29/MALT1
GOCC	NEUROMUSCULAR JUNCTION	69	-0.367401	-1.47867	0.0091801	0.0423261	0.0295655	3664	tags=30%, list=18%, signal=25%	COL4A5/PDZRN3/SPOCK1/LAMA2/DLG1/APP/STXBP5/F2R/SYNJ2BP/ITGB1/SYNC/LAMB2/PTN/TBC1D24/DES/LAMA5/DLG2/LRP4/TUBA1A/POSTN/UTRN
GOCC	EXORIBONUCLEASE COMPLEX	26	0.546297	1.67385	0.00917794	0.0423261	0.0295655	2642	tags=42%, list=13%, signal=37%	CARHSP1/MPHOSPH6/EXOSC4/PNPT1/EXOSC3/DIS3/EXOSC1/WDR74/ZFP36/EXOSC2/EXOSC5
GOMF	ATPASE COUPLED ION TRANSMEMBRANE TRANSPORTER ACTIVITY	46	0.438552	1.5245	0.00917306	0.0423261	0.0295655	2676	tags=33%, list=13%, signal=28%	ATP12A/ATP6V0D1/ATP6V1B2/ATP5F1B/ATP6V1G1/ATP6V0B/ATP2A2/ATP6V1F/ATP13A1/ATP6V1D/ATP6V1C1/ATP6V1C2/ATP6V1H/ATP6V1A/ATP6V0E1
GOBP	DERMATAN SULFATE PROTEOGLYCAN METABOLIC PROCESS	16	-0.613981	-1.74339	0.00915206	0.0422858	0.0295373	5647	tags=62%, list=27%, signal=46%	CSGALNACT2/IDUA/VCAN/BGN/B3GAT3/CSPG4/DSEL/CHST14/DCN/UST
GOBP	NEGATIVE REGULATION OF AMYLOID PRECURSOR PROTEIN CATABOLIC PROCESS	20	-0.565867	-1.71774	0.00914916	0.0422858	0.0295373	4151	tags=55%, list=20%, signal=44%	RTN2/CLU/SORL1/GGA3/TMED10/RTN1/APOE/BIN1/NTRK2/RTN4/RTN3
GOBP	NEGATIVE REGULATION OF CELLULAR RESPONSE TO GROWTH FACTOR STIMULUS	93	-0.35555	-1.52463	0.00912223	0.042206	0.0294816	5594	tags=46%, list=27%, signal=34%	FGF2/SFRP1/HHEX/SFRP2/FBN1/SULF2/BAMBI/LEMD3/SHISA2/DAB2IP/HTRA1/TOB1/CRIM1/SMURF1/SORL1/CREB3L1/FSTL3/ABL1/AGT/GPC1/SLIT2/NOG/SPART/MMRN2/SEMA6A/TRIM33/PPARG/NBL1/ADGRA2/PIK3CB/GREM1/SMURF2/TNMD/CHRDL1/SKI/RBPMS2/ATP2B4/DCN/SPRY1/SPRY2/GREM2/EPN2/GATA3
GOMF	PROTEIN KINASE A REGULATORY SUBUNIT BINDING	25	-0.522296	-1.68647	0.00908821	0.0420776	0.0293919	4594	tags=40%, list=22%, signal=31%	AKAP8/AKAP6/WASF2/PRRC1/C2orf88/WASF3/AKAP1/AKAP11/AKAP9/PJA2
GOBP	NEGATIVE REGULATION OF BMP SIGNALING PATHWAY	46	-0.410729	-1.53368	0.00908122	0.0420742	0.0293895	5538	tags=57%, list=27%, signal=42%	CTDSPL2/SMAD7/TMPRSS6/SFRP1/SFRP2/FBN1/BAMBI/LEMD3/HTRA1/TOB1/CRIM1/SMURF1/SORL1/FSTL3/ABL1/NOG/SPART/TRIM33/PPARG/NBL1/GREM1/SMURF2/CHRDL1/SKI/RBPMS2/GREM2
GOBP	ENDOCRINE PROCESS	75	-0.363594	-1.49262	0.00907724	0.0420742	0.0293895	5339	tags=44%, list=26%, signal=33%	TACR2/PTPN11/ACE/CPA3/CMA1/SMAD4/GDF9/C1QTNF3/PCSK5/CRY1/AVPR1A/BMP6/TRPV6/EDN3/HSD11B2/TAC1/GAL/GNAS/AGT/CTSG/TBX3/ECE1/LEP/EDN1/F2R/SELENOM/RAB11FIP5/RAB11FIP3/FOXD1/FZD4/AGTR1/INHBB/GATA3
GOBP	NEGATIVE REGULATION OF CARDIOCYTE DIFFERENTIATION	10	-0.684926	-1.71543	0.00907145	0.0420742	0.0293895	5995	tags=90%, list=29%, signal=64%	FRS2/DLL1/SMAD4/BMP2/PRICKLE1/DKK1/EGFR/FZD7/SOX6
GOBP	WHITE FAT CELL DIFFERENTIATION	13	-0.657403	-1.79019	0.00894263	0.041518	0.029001	3121	tags=54%, list=15%, signal=46%	SIRT1/PPARG/AACS/PER2/FABP4/PNPLA3/PDGFRA
GOBP	TRANSPORT ALONG MICROTUBULE	152	-0.300199	-1.36918	0.00892045	0.0414437	0.0289491	5820	tags=50%, list=28%, signal=36%	TNPO1/BICD1/TTC30B/LCA5L/KIF3C/IFT88/RPGR/LAMP1/IFT81/AP3M1/BICD2/ACTR10/TRIP11/IFT140/KIF3A/SPG11/OPA1/ARHGAP21/MAPK8IP3/BBS12/MAPT/MGARP/DYNC1H1/KIF17/ARMCX3/COPG2/IFT74/DYNC2LI1/IFT27/FEZ1/AP3M2/TTC30A/IFT172/IFT52/KIF5C/KLC3/DYNC1I1/APP/ARL8A/LCA5/TTC21B/TRAK1/DYNC2H1/SFPQ/DYNC2I1/SUN2/FYCO1/TRAF3IP1/PURA/DYNLL2/TERF2/SYNE2/IFT22/RHOT1/TUB/CLUAP1/DST/ARL3/TRAK2/DYNLRB2/MAP2/CAMSAP3/PCM1/AP3S1…
GOBP	NEURAL CREST CELL MIGRATION	55	-0.401435	-1.55023	0.00891973	0.0414437	0.0289491	5087	tags=47%, list=24%, signal=36%	EDNRB/TBX1/ALX1/SEMA4C/SEMA3C/SEMA3A/RADIL/PITX2/EDN3/SEMA6D/NRP1/ERBB4/BMP4/KITLG/NRTN/SOX10/SEMA3E/SOX8/SEMA4G/SEMA6A/TWIST1/SEMA3B/FN1/BMP7/SEMA3G/LAMA5
GOMF	COLLAGEN BINDING	68	-0.378538	-1.5182	0.00891587	0.0414437	0.0289491	5498	tags=50%, list=26%, signal=37%	PCOLCE/LACRT/PAK1/VWF/COL5A3/SMAD4/DDR1/PDGFB/COL6A1/COL6A2/GP6/ITGA1/CTSK/LOX/AEBP1/DDR2/ITGA11/CHADL/ANTXR1/PDGFA/PCOLCE2/PODN/MRC2/ITGB1/FN1/ECM2/SMAD3/CCBE1/DCN/ASPN/SPARCL1/ITGA9/CRTAP/TGFBI
GOBP	HOMOLOGOUS RECOMBINATION	57	0.436822	1.5856	0.00889745	0.0414228	0.0289345	3702	tags=30%, list=18%, signal=25%	RAD51/TRIP13/CENPX/TOP2A/RAD51AP1/SHOC1/BRIP1/MND1/FANCD2/CENPS/RAD54L/RAD54B/MSH3/EME1/SYCE3/RAD50/REC8
GOBP	REGULATION OF SIGNAL TRANSDUCTION BY P53 CLASS MEDIATOR	173	0.328284	1.40579	0.00882167	0.0410985	0.0287079	4898	tags=40%, list=23%, signal=31%	AURKB/HDAC1/AURKA/TPX2/SMYD2/HUS1/RPA3/PRMT5/ZMPSTE24/NOP2/EXO1/EEF1E1/MIF/BRIP1/CDK5/TAF10/BCL2L12/RFC2/CSNK2A1/DNA2/PLK3/BLM/RFC3/PRMT6/BOP1/ARMC10/NOC2L/TAF13/RPF2/CHEK2/BDKRB2/TP63/TRIAP1/HIPK2/BRCA1/HDAC2/CDK2/MEAF6/PML/ING2/TAF11/TOP3A/MDM2/PSMD10/RFC4/RRS1/PRKAG1/PAK1IP1/KDM1A/RMI2/SSRP1/RAD50/MAPK14/ATR/MAPKAPK5/RPA1/TAF5/HNRNPK/CSNK2B/MBD3/SETD9/PMAIP1/RFC5/TAF2/YJU2/POU4F2/RHNO1/RBBP4/P…
GOBP	NLRP3 INFLAMMASOME COMPLEX ASSEMBLY	14	0.645129	1.70448	0.00880786	0.0410626	0.0286829	2991	tags=50%, list=14%, signal=43%	GBP5/STMP1/AIM2/CD36/DHX33/NLRC3/CPTP
GOBP	NEGATIVE REGULATION OF CELL MATRIX ADHESION	36	-0.458405	-1.61488	0.00879706	0.0410407	0.0286676	4530	tags=50%, list=22%, signal=39%	LRP1/PHLDB2/ACER2/DMTN/PTEN/BCAS3/JAG1/FAM107A/SEMA3E/APOD/ACVRL1/ARHGAP6/NEXMIF/MYOC/BCL6/PIK3R1/DLC1/POSTN
GOBP	PH REDUCTION	57	0.437146	1.58677	0.00878115	0.040995	0.0286356	3309	tags=33%, list=16%, signal=28%	RAB38/ATP6V0D1/ATP6V1B2/ATP6V1G1/ATP6V0B/ATP6V1F/CLCN3/SLAMF8/ATP6V1D/ATP6V1C1/ATP6V1C2/GRN/ATP6V1H/ATP6V1A/SNAPIN/ATP6V0E1/FASLG/CLN6/TMEM199
GOCC	PROTEIN KINASE COMPLEX	100	0.38017	1.51324	0.00876048	0.0409269	0.0285881	4080	tags=38%, list=20%, signal=31%	CCNB1/CDK1/CCNB2/CKS2/PYCARD/PCNA/CCNE1/CCNA2/CCNE2/CCNF/ATG13/CDK5/PHKA1/CDKN1A/IFIT5/BCCIP/CKS1B/SESN2/CCND2/IKBKG/PYDC1/PRKAR2A/CAB39/CCNO/CDK7/CDK2/MAP3K5/RB1/CCNH/CHUK/CDK9/PRKAG1/CCND3/CDKN2D/CDK4/PHKG2/WDR41/CCNK
GOMF	ANTIOXIDANT ACTIVITY	81	0.393175	1.51231	0.00874061	0.0408625	0.0285431	5405	tags=44%, list=26%, signal=33%	S100A9/TXNDC17/GPX2/SRXN1/GSTP1/GSTO1/SELENOT/TXNRD1/PRDX1/DUOX1/GPX1/SOD2/SESN2/GSTZ1/TXN/PRDX5/TXNRD3/PARK7/IPCEF1/MGST2/PRDX6/PTGES/PXDN/PRDX4/HP/ALOX5AP/PRXL2B/GSTK1/PXDNL/LPO/SELENOS/DUOX2/PTGS2/LOXHD1/NQO1/APOA4
GOBP	DEOXYRIBONUCLEOSIDE MONOPHOSPHATE METABOLIC PROCESS	16	0.627408	1.73735	0.00873818	0.0408625	0.0285431	1371	tags=38%, list=7%, signal=35%	TYMP/UPP1/TK1/TYMS/XDH/DNPH1
GOBP	ADHERENS JUNCTION ASSEMBLY	12	-0.651541	-1.72632	0.00871249	0.0407878	0.028491	5248	tags=83%, list=25%, signal=62%	SMAD7/HIPK1/PIP5K1C/PAK2/CTNNB1/RAMP2/VCL/DLG5/JAM3/ZNF703
GOBP	POSITIVE REGULATION OF PROTEIN KINASE B SIGNALING	160	-0.308578	-1.41592	0.00871039	0.0407878	0.028491	3370	tags=31%, list=16%, signal=26%	FGFR3/ERBB3/KLB/FGF1/IL18/ERBB4/PDGFRB/KITLG/NRG2/INSR/LEP/STK3/IGF1R/TNFAIP8L3/MET/ESR1/PDGFA/FGF9/EGF/EGFR/HIP1/AKR1C3/PTK2/PIK3CB/FGFR2/ITGB1/GAS6/FGFR1/RICTOR/OSBPL8/IGFBP5/F10/PINK1/FERMT2/RTN4/MYOC/TSPYL5/FYN/IRS1/PIK3R1/AXL/PDGFRA/TCF7L2/SPRY2/KIT/IRS2/GATA3/F3/BTC
GOBP	REGULATION OF CYSTEINE TYPE ENDOPEPTIDASE ACTIVITY INVOLVED IN APOPTOTIC SIGNALING PATHWAY	17	0.604617	1.68704	0.00869282	0.0407525	0.0284663	3304	tags=59%, list=16%, signal=50%	MMP9/PIH1D1/LGALS9/CAAP1/PLAUR/CASP8/PARK7/BAX/HTRA2/NLE1
GOCC	ENDOPLASMIC RETICULUM GOLGI INTERMEDIATE COMPARTMENT MEMBRANE	72	0.410714	1.54306	0.00868614	0.0407496	0.0284643	3968	tags=31%, list=19%, signal=25%	CTSC/PRRG4/SERPINA1/TGFA/AREG/TAP1/TAP2/LMAN2/BCAP31/YIF1A/YIF1B/CNIH1/YKT6/LAMP5/TMED5/SURF4/TAPBP/LMAN1/TMEM199/TMED7/TMED9/ROBO1
GOCC	CYTOPLASMIC REGION	251	-0.270486	-1.31007	0.00867286	0.0407158	0.0284406	4701	tags=29%, list=23%, signal=23%	INPP5E/MAPT/ERC1/MGARP/DYNC1H1/KIF17/ARMCX3/PHLDB2/DNAH9/PCLO/CFAP36/CEP162/BBS7/AK8/ARL6/DYNC2LI1/EFHC2/SPATA7/DNAL1/AP3M2/TTC30A/IFT172/ZC3H14/SEPTIN2/KIF5C/DRC3/KCNAB1/ARL8A/LCA5/CFAP91/DZIP1L/LRRK2/TRAK1/DYNC2H1/SFPQ/CLASP1/DNAI7/DYNC2I1/TRAF3IP1/PURA/TERF2/TULP3/EPB41L2/DST/NUMA1/TRAK2/SEPTIN7/PKD2/EPB41/CCDC113/PHLDB1/MAP2/CAMSAP3/BBS1/GABARAPL1/AP3S1/MAPK1/WDR35/WDPCP/MAP1A/PAFAH1B1/ATG14/…
GOBP	REGULATION OF STRIATED MUSCLE CELL DIFFERENTIATION	76	-0.378483	-1.55734	0.00866229	0.0406946	0.0284258	5433	tags=49%, list=26%, signal=36%	MYLK3/PAK1/DLL1/IGF1/RBM24/SMAD4/TRIM32/TBX1/MAMSTR/AKAP6/HDAC4/PI16/MSX1/TMEM119/KAT2A/HDAC9/HDAC5/PLPP7/BMP2/PARP2/BMP4/RGS2/SHOX2/EDN1/CCN3/DKK1/FZD7/GREM1/PPARA/MEF2C/MYOCD/NLN/CYP26B1/BHLHE41/BCL2/SOX6/EFNB2
GOCC	INTRINSIC COMPONENT OF ENDOPLASMIC RETICULUM MEMBRANE	158	0.341439	1.45218	0.00866147	0.0406946	0.0284258	5241	tags=45%, list=25%, signal=34%	SLC35B1/DHRS9/DPAGT1/HSPA5/HM13/TAP1/SPPL2A/ZMPSTE24/TAP2/ELOVL7/BCAP31/TMCO1/EMC6/UBXN8/EDEM1/EMC3/CYP2E1/EMC8/PREB/DERL2/EMC9/HACD1/AUP1/SEC61A1/SLC37A4/HLA-E/RCE1/DOLK/SLC37A2/TAPBP/SAMD8/EXT1/DPM2/CANX/SREBF2/EMC1/CPT1C/DOLPP1/ELOVL4/SLC35B4/HLA-DRA/ESYT3/EMC7/ANKLE2/B2M/HLA-F/ELOVL1/HLA-B/G6PC1/PIGU/HLA-G/ACER3/GRAMD2A/TMEM33/DNAJB12/BNIP1/ELOVL6/GPAA1/ELOVL2/EMC4/PDIA3/PORCN/HLA-DQB1/SELENO…
GOBP	REGULATION OF INTRACELLULAR TRANSPORT	340	0.292076	1.33757	0.0086184	0.0405451	0.0283214	4119	tags=32%, list=20%, signal=26%	ZC3H12A/RAN/IFI27/TFDP1/GZMB/FZD5/PLA2G3/SPAG5/NMT1/UBE2L3/YWHAQ/FERMT1/ZPR1/PCSK9/UBE2D3/SFN/ECT2/BORCS5/NDRG4/TMEM30B/CPSF6/IFNG/BCAP31/IL1B/MX2/UBL5/ATG13/SIRT7/BAG3/PDCD10/BID/CDK5/EIPR1/HAX1/MTCL1/PDCD5/TCAF2/TMEM30A/EDEM1/NOLC1/RAC2/KIF20B/PLK3/CD36/ITGB2/CIB1/PREB/SAE1/NSUN2/MTMR2/DERL2/HRAS/SNX12/RANGAP1/CASP8/ARV1/TP63/ANTKMT/TXN/TARDBP/YWHAZ/ARIH2/NDEL1/PARK7/PIK3R2/EDEM2/IWS1/UBE2J2/NR…
GOBP	ORGANOPHOSPHATE ESTER TRANSPORT	127	0.354313	1.4647	0.00861379	0.0405451	0.0283214	4395	tags=33%, list=21%, signal=26%	SLC25A5/PRELID1/ABCC1/LDLR/ABCA12/PLSCR1/PRELID3B/ATP10B/DBI/TMEM30B/ABCG1/EPG5/GLTP/OSBPL2/PITPNC1/SLC25A25/SLC25A33/SLC25A51/TMEM30A/ATP10D/SLC37A4/PITPNB/SLC37A2/TRIAP1/SLC25A19/PITPNM1/SLC19A1/FASLG/CPTP/PITPNA/PRKCD/C2CD2L/G6PC1/SLC66A2/SLC25A32/PLSCR2/GJA1/ATP8B1/ABCA7/CR1/ATP11B/ABCC5
GOBP	DEVELOPMENTAL CELL GROWTH	207	-0.290516	-1.3699	0.00860783	0.0405451	0.0283214	4901	tags=37%, list=23%, signal=28%	GDF9/GDI1/SEMA4C/SEMA3C/MAPT/DDR1/AKAP6/SHTN1/LRP1/HDAC6/USP9X/PI16/SEMA3A/DVL1/RND2/CTNNB1/RUFY3/SMURF1/PARP2/PRKN/SEMA6D/NEDD4L/NRP1/TNN/VCL/SYT1/APP/ABL1/SIN3A/KMT2D/CXCL12/RTN4R/RGS2/PDLIM5/SEMA3E/GOLGA4/EDN1/MACF1/L1CAM/SLIT2/SPART/SEMA4G/AUTS2/SEMA6A/FGF13/SEMA3B/PPP3CB/NDN/RYK/SLIT3/APOE/PTPRS/DCLK1/ULK2/LAMB2/FN1/SORBS2/GSK3B/PPARA/MAP2/SYT17/NTN1/AKAP13/IQGAP1/ADRA1A/RTN4/TGFBR2/DPYSL2/N…
GOBP	CELL SURFACE RECEPTOR SIGNALING PATHWAY INVOLVED IN HEART DEVELOPMENT	27	-0.522706	-1.71249	0.00860548	0.0405451	0.0283214	4675	tags=48%, list=22%, signal=37%	WNT11/HEY1/MSX1/CTNNB1/BMP2/BMP4/JAG1/NOG/DKK1/BMPR1A/GALNT11/RBPJ/NOTCH2
GOBP	RESPONSE TO TEMPERATURE STIMULUS	217	0.317505	1.3935	0.0086039	0.0405451	0.0283214	4826	tags=37%, list=23%, signal=29%	CXCR4/EIF2B2/DNAJB6/VCP/RPA3/EIF2S1/DNAJA2/ERO1A/CXCL10/ATP2A2/NUP37/IRAK1/NUP210/PLAC8/HSBP1/NUP88/CLPB/IER5/BAG3/LYN/HMOX1/HSPA8/CDKN1A/HSPH1/SOD2/PDCD6/NUP50/GLRX2/HIKESHI/ACOT11/NR2F6/DNAJB1/CASP8/POLR2D/EIF2B1/RAE1/SEC13/DNAJC7/TFEC/HSPD1/EIF2B4/CHORDC1/NUP155/HDAC2/DNAJA3/TRPV3/MICB/NDC1/MLST8/HTRA2/DNAJC2/NUP188/NUP85/GCLC/PTGES3/FKBP4/EIF2B5/DAXX/MAPKAPK2/NUP205/EIF2B3/UCP2/NUP58/NTSR1/MT…
GOBP	EMBRYONIC BODY MORPHOGENESIS	11	-0.675456	-1.72855	0.00853007	0.0402706	0.0281297	5323	tags=82%, list=26%, signal=61%	MAB21L2/ZNF281/PHLDB2/CLASP1/PHLDB1/DAG1/IFT122/CDON/GREM2
GOCC	ENDOSOME MEMBRANE	489	0.279384	1.31222	0.00852427	0.0402706	0.0281297	4951	tags=34%, list=24%, signal=27%	TMEM165/CD274/MICALL1/IRF7/FZD5/AP2S1/MREG/ABHD17C/MYD88/LAMP3/LDLR/ATP6V0D1/IRAK2/DTX3L/RAB11A/RAB27A/YIPF1/ATP6V0B/PCSK9/VPS25/IRAK1/SPPL2A/SCYL2/UBE2D3/ABCB6/SNX20/FCGR1B/RAP2B/PSENEN/AP3D1/SNX1/LAMTOR5/LAMTOR2/CLCN3/RAB31/VPS29/RAB5A/IKBKE/STOML1/GNPNAT1/SNX6/STAM/VTA1/TBK1/SPNS2/NSG1/WDR91/PLEKHB2/IFITM3/SNX10/RAB10/STEAP4/MYO1B/SLC39A4/LAMP5/EHD4/COMMD1/RCC2/AP5S1/MTMR2/CTSD/TMEM163/PMEL/IT…
GOBP	TOLERANCE INDUCTION	28	0.524572	1.64582	0.00848725	0.0401248	0.0280278	6065	tags=68%, list=29%, signal=48%	CD274/IDO1/ICOS/LYN/LGALS9/IL2RA/LILRB4/HLA-E/CD3E/IRAK3/LILRB2/HLA-B/HLA-G/FOXP3/AIRE/CCR4/CLC/XKR8/FOXJ1
GOCC	CYTOSOLIC SMALL RIBOSOMAL SUBUNIT	43	-0.443518	-1.63211	0.00848095	0.0401233	0.0280267	5734	tags=60%, list=27%, signal=44%	RPS3/RPS21/RPS10/RPS13/RPS12/RPS7/RPS18/EIF2D/RPS11/RPS5/RPS9/RPS25/RPS15A/RPS15/RPS27/EIF2A/RPS8/RPS6/RPS4X/RPS14/RPS17/RPS24/RPS23/RPS27L/RPS20/RPS3A
GOBP	NEGATIVE REGULATION OF MUSCLE CELL DIFFERENTIATION	52	-0.413331	-1.57494	0.00846969	0.0400982	0.0280093	5351	tags=52%, list=26%, signal=39%	PAK1/DLL1/SMAD4/PDGFB/HDAC4/PI16/MSX1/TMEM119/HDAC5/PLPP7/ANKRD17/BMP2/RGS2/CCN3/DKK1/FGF9/FZD7/NFATC2/MECP2/PPARA/MYOCD/RBPMS2/PDCD4/NFATC1/BHLHE41/PRDM6/SOX6
GOBP	ESTABLISHMENT OF PROTEIN LOCALIZATION TO TELOMERE	18	0.607582	1.72301	0.0084184	0.0398835	0.0278593	4190	tags=67%, list=20%, signal=53%	CCT5/CCT2/CCT3/CCT7/BRCA2/TCP1/DKC1/CCT6A/CCT8/NABP2/ATR/WRAP53
GOBP	AMINE TRANSPORT	90	-0.345336	-1.47068	0.00841228	0.0398826	0.0278587	4134	tags=28%, list=20%, signal=22%	AVPR1A/VIP/PRKN/SLC43A1/SLC12A2/SYT1/CLTRN/CXCL12/RGS2/LEP/SNCG/PER2/NPY5R/ITGB1/SYT17/SNCA/RAB3B/PINK1/RAB3GAP1/ARL6IP5/ATP1A2/ADRA2A/SLC18A2/SYT8/AQP9
GOMF	TRANSLATION REGULATOR ACTIVITY NUCLEIC ACID BINDING	97	0.37596	1.48865	0.00840227	0.0398633	0.0278452	4350	tags=42%, list=21%, signal=34%	GSPT1/C1QBP/EIF2B2/TSFM/EIF4E2/MCTS1/EIF2S2/EIF4E/TYMS/EIF6/EIF3J/EIF2S1/SHMT2/EIF3I/MRPL58/COPS5/DENR/EIF3K/GTPBP2/TUFM/MTIF2/DHFR/EIF3B/EIF2B1/EIF4H/EIF4G2/EIF2B4/LARP1/ABCF1/EIF4G1/EIF5/EIF2B5/DAZL/EIF5A/EIF2B3/DHX29/MTRF1L/EIF3A/CPEB4/EFL1/EIF3M
GOBP	CARDIAC NEURAL CREST CELL DIFFERENTIATION INVOLVED IN HEART DEVELOPMENT	11	-0.677272	-1.7332	0.00835862	0.0396842	0.0277201	4733	tags=73%, list=23%, signal=56%	SEMA3C/PITX2/BMP4/HES1/JAG1/TWIST1/MAPK1/BMP7
GOBP	TRNA METHYLATION	39	0.474595	1.59195	0.00835755	0.0396842	0.0277201	3573	tags=38%, list=17%, signal=32%	WDR4/MTO1/FTSJ1/METTL6/METTL1/HSD17B10/TRMT10C/NSUN2/TRMT6/TRMT112/METTL8/TRMT1/LCMT2/THUMPD3/TYW3
GOCC	MIDBODY	190	0.331032	1.43018	0.00832173	0.039565	0.0276368	3712	tags=29%, list=18%, signal=24%	LAP3/RAN/CDK1/KIF20A/BIRC5/CEP55/AURKB/NEK2/PRC1/KATNB1/KIF4A/AURKA/SPAG5/SHCBP1/HSPA5/KIF14/TXNDC9/CENPF/CDCA8/GNL3/BCL3/CENPE/RALB/ECT2/KIF23/RACGAP1/SLC2A1/EXOC3/ANLN/MTCL1/PSRC1/PLK1/CIAO2B/KIF20B/TTLL12/GNAI3/RCC2/USP3/CCDC124/TRAPPC14/PDCD6IP/PITPNM1/KEAP1/NAT10/VPS37B/EXOC2/CHMP1B/RNF8/KATNA1/RAB8A/UHMK1/ENTR1/MPLKIP/CAPG/AGAP2/CCDC69
GOCC	LUMENAL SIDE OF MEMBRANE	31	0.522878	1.66596	0.00832011	0.039565	0.0276368	5595	tags=61%, list=27%, signal=45%	BDH1/HM13/SPPL2A/BCAP31/HSPA8/CTSA/HLA-E/TAPBP/CANX/HLA-DRA/HLA-F/HLA-B/HLA-G/DNAJC19/HLA-DQB1/HLA-A/HLA-DPB1/HLA-C/CALR
GOBP	REGULATION OF SPINDLE CHECKPOINT	15	0.630631	1.70576	0.00826337	0.0393433	0.0274819	2381	tags=47%, list=11%, signal=41%	CCNB1/NDC80/MAD2L1/CDT1/GEN1/MAD2L1BP/LCMT1
GOBP	DERMATAN SULFATE METABOLIC PROCESS	13	-0.661163	-1.80044	0.00826298	0.0393433	0.0274819	5647	tags=62%, list=27%, signal=45%	IDUA/VCAN/BGN/CSPG4/DSEL/CHST14/DCN/UST
GOBP	PURINE NUCLEOSIDE METABOLIC PROCESS	59	0.42732	1.56087	0.00822595	0.0392207	0.0273963	2926	tags=32%, list=14%, signal=28%	RAN/PNP/NME1/AHCY/MFN1/ENTPD7/ACP3/TJP2/APRT/IMPDH1/NT5C2/HPRT1/XDH/ADK/GNAI3/GMPS/ADA2/AMD1/CASK
GOBP	NUCLEOLAR LARGE RRNA TRANSCRIPTION BY RNA POLYMERASE I	17	0.606874	1.69334	0.0081777	0.0390183	0.0272549	4956	tags=76%, list=24%, signal=58%	MACROH2A1/IPPK/MARS1/SIRT7/PIH1D1/MACROH2A2/SMARCA4/NOL11/MTOR/PWP1/TAF1B/NCL/TCOF1
GOBP	REGULATION OF LIPID METABOLIC PROCESS	378	-0.244556	-1.24603	0.00817575	0.0390183	0.0272549	4981	tags=36%, list=24%, signal=28%	STUB1/LGALS12/ABCD2/FABP3/MBTPS2/NPC2/HTR2A/CPT1A/NCOA6/FASN/H6PD/ABCA2/PDGFB/CYP1A1/DAB2IP/ELOVL5/PSAP/NCOA1/TEK/MED1/NR1D2/RGN/PLIN2/ACSL3/INSIG1/ERLIN2/AVPR1A/AADAC/RGL1/LSS/RARRES2/SORL1/BMP2/BMP6/PIP4K2A/PCK1/GPER1/NCOA2/SCARB1/PDK2/SLC27A1/PRKCE/ACSL1/FGFR3/TIAM2/PEX11A/C3/FGF1/NCOR1/FADS1/MFSD2A/WASHC1/SIRT1/SIN3A/APOC1/GPAM/ADGRF5/NPAS2/GAL/PDGFRB/AGT/ABCB4/PRKD1/GGPS1/G0S2/RORC/BCL11B/NR…
GOBP	NUCLEAR ENVELOPE REASSEMBLY	18	0.609035	1.72713	0.00816522	0.0390142	0.027252	3946	tags=50%, list=19%, signal=41%	PPP2CA/PPP2R2A/REEP4/VRK1/NSFL1C/ANKLE2/PPP2R1A/EMD/CHMP2A
GOBP	B CELL ACTIVATION	261	0.307248	1.3724	0.00813536	0.0388992	0.0271717	4929	tags=35%, list=24%, signal=27%	NOD2/BLNK/TNFRSF21/CTPS1/HMGB3/BAK1/EZH2/PHB/PTPN2/BCL3/ADAM17/SAMSN1/PLCG2/TNIP2/SASH3/JAK3/EXOSC3/EXO1/MIF/LYN/SLAMF8/CDKN1A/RASGRP1/SYK/IKZF3/IL7R/IL6/ITGA4/CD27/BATF/NSD2/MAD2L2/GPR183/RNF168/PRKDC/TFRC/HMCES/CASP8/LAPTM5/PIK3CD/CD86/LIG4/HSPD1/BST2/DOCK10/LAT2/LEF1/BAX/ERCC1/RNF8/PELI1/CASP3/TYROBP/PHB2/PRKCD/TCF3/CD38/TNFRSF13B/TNFRSF4/CARD11/TBC1D10C/ZAP70/MNDA/TNFSF13B/IGHV7-81/MZB1/CD300…
GOBP	POSITIVE REGULATION OF SMOOTH MUSCLE CELL MIGRATION	36	-0.460325	-1.62165	0.00811663	0.0388373	0.0271285	5576	tags=58%, list=27%, signal=43%	NOX4/PAK1/IGF1/ATP7A/PDGFB/LRP1/HDAC4/CCN4/SEMA6D/NRP1/PDGFRB/DOCK5/DOCK4/FGF9/PDGFD/DOCK7/IGFBP5/IQGAP1/LPAR1/BCL2/POSTN
GOBP	NEGATIVE REGULATION OF CARTILAGE DEVELOPMENT	25	-0.525112	-1.69557	0.00805299	0.0385602	0.0269349	5946	tags=60%, list=28%, signal=43%	RARB/NKX3-2/WNT9A/PTPN11/WNT11/CCN4/RFLNB/BMP4/LEP/CHADL/NOG/GREM1/FRZB/EFEMP1/GLI2
GOBP	CARDIAC VENTRICLE MORPHOGENESIS	69	-0.372485	-1.49913	0.00802604	0.0384586	0.026864	3538	tags=33%, list=17%, signal=28%	SEMA3C/HEY1/MED1/TGFB2/FOXC2/PPP1R13L/JAG1/SOX4/NOG/CPE/NPY5R/DSP/FOXC1/FGFR2/BMPR1A/MEF2C/RBPJ/TGFBR2/ZFPM2/TNNC1/TPM1/TGFBR3/GATA3
GOBP	MEMBRANE DEPOLARIZATION DURING ACTION POTENTIAL	35	-0.476955	-1.66564	0.00801943	0.0384543	0.026861	3906	tags=37%, list=19%, signal=30%	SCN1B/SCN3A/SCN9A/PTPN3/CACNA1H/KCNH2/CACNB2/ANK2/SLC8A1/SCN7A/SCN3B/ATP1A2/CACNA2D1
GOBP	CENTRAL NERVOUS SYSTEM NEURON AXONOGENESIS	35	-0.47693	-1.66555	0.00801943	0.0384543	0.026861	3554	tags=49%, list=17%, signal=40%	EPHB3/SZT2/SCN1B/PTEN/TCTN1/SLIT2/EPHB6/TSKU/ARHGAP35/DCLK1/ADARB1/NFIB/PAFAH1B1/EPHB1/NIN/GLI2/C12orf57
GOBP	REGULATION OF NEUROTRANSMITTER TRANSPORT	94	-0.350967	-1.50085	0.00801509	0.0384543	0.026861	3887	tags=32%, list=19%, signal=26%	RAP1B/GPER1/PRKN/GRIN3A/NOS1/RAP1A/SYT1/PREPL/STXBP5/LRRK2/SNCG/NLGN1/SNCAIP/CACNB2/PNKD/PER2/RHOT1/GPM6B/ITGB1/GSK3B/MEF2C/P2RX1/SNCA/RAB3B/PRKCB/ADRA1A/RAB3GAP1/ATP1A2/ADRA2A/KCNMB4
GOBP	REGULATION OF AXONOGENESIS	149	-0.307367	-1.39814	0.00799913	0.0384393	0.0268505	4765	tags=34%, list=23%, signal=27%	SEMA4C/SEMA3C/MAPT/PAK2/SHTN1/LRP1/SEMA3A/RND2/RUFY3/AMIGO1/LRRC4C/SEMA6D/PTEN/NRP1/PLXND1/EFNB3/TIAM2/ROBO2/CXCL12/RTN4R/SHOX2/SEMA3E/GOLGA4/MACF1/L1CAM/SLIT2/SPART/SEMA4G/MAP6/SEMA6A/EFNA1/FGF13/SEMA3B/RYK/PTPRS/ARHGAP35/NTRK2/FN1/TRAK2/GSK3B/MAP2/NTN1/RTN4/PAK3/NIN/PLXNA2/SEMA3G/DBN1/UST/LRP4/MAP1B
GOCC	T TUBULE	51	-0.423175	-1.60836	0.00796626	0.0383088	0.0267593	2151	tags=37%, list=10%, signal=33%	CASQ1/SCN1B/AKAP6/RTN2/RDX/CAPN3/CACNB2/FXYD1/PPP3CB/ANK2/BIN1/SLC8A1/ADRA1A/ATP2B4/STAC/ATP1A2/CACNA2D1/AHNAK/AHNAK2
GOBP	MICROTUBULE BASED TRANSPORT	182	-0.296093	-1.38934	0.00795525	0.0382832	0.0267415	5492	tags=44%, list=26%, signal=33%	IFT88/RPGR/LAMP1/IFT81/AP3M1/BICD2/ACTR10/TRIP11/IFT140/KIF3A/SPG11/OPA1/ARHGAP21/MAPK8IP3/BBS12/MAPT/MGARP/DYNC1H1/KIF17/ARMCX3/TTLL1/COPG2/IFT74/DYNC2LI1/IFT27/NME5/FEZ1/AP3M2/TTC30A/IFT172/IFT52/KIF5C/KLC3/DYNC1I1/APP/ARL8A/LCA5/KATNIP/TTC21B/TRAK1/DYNC2H1/SFPQ/DYNC2I1/SUN2/FYCO1/TRAF3IP1/PURA/RFX3/DYNLL2/OFD1/TERF2/SYNE2/IFT22/RHOT1/SPEF2/TUB/CLUAP1/DST/ARL3/TRAK2/DYNLRB2/NPHP3/MAP2/CAMSAP3/J…
GOBP	PROTEIN INSERTION INTO MITOCHONDRIAL INNER MEMBRANE	11	0.685545	1.70129	0.00790072	0.038048	0.0265772	1397	tags=45%, list=7%, signal=42%	TIMM8B/NDUFA13/TIMM13/TIMM10/ROMO1
GOBP	MODULATION BY HOST OF VIRAL GENOME REPLICATION	17	0.608194	1.69702	0.00779136	0.0375483	0.0262281	1632	tags=35%, list=8%, signal=33%	ZC3H12A/IFI27/PHB/VAPA/HSPA8/CCL8
GOBP	DICARBOXYLIC ACID BIOSYNTHETIC PROCESS	14	0.650022	1.71741	0.00774829	0.0373676	0.0261018	1948	tags=36%, list=9%, signal=32%	KYNU/GOT2/GOT1/MTHFD1/MTHFD1L
GOMF	ENDOPEPTIDASE REGULATOR ACTIVITY	178	0.326911	1.40065	0.00772353	0.0372749	0.0260371	2538	tags=20%, list=12%, signal=18%	SERPINB3/PI3/SERPINB4/PSME2/SERPINB13/PTTG1/LTF/SERPINB1/A2ML1/BIRC5/SERPINA1/CSTB/SLPI/PSME1/CSTA/CST7/PSENEN/PSMD14/GAPDH/SPOCK2/SERPINA3/UCHL5/WFDC12/SERPINB9/RPS6KA1/SERPINB8/SPINT2/BIRC3/CD27/PSMF1/ADRM1/PSME3/CARD16/PRDX5/USP14/FURIN
GOBP	TRANSCRIPTION ELONGATION FROM RNA POLYMERASE I PROMOTER	29	0.535127	1.67925	0.00770681	0.0372209	0.0259994	5583	tags=55%, list=27%, signal=40%	POLR2H/POLR2F/POLR1H/POLR2L/POLR1C/TAF1D/POLR1B/CDK7/POLR2E/POLR1G/CCNH/POLR1A/TAF1B/GTF2H1/ERCC6/TAF1A
GOBP	RESPONSE TO X RAY	32	0.498065	1.60787	0.00768094	0.0371227	0.0259308	3226	tags=47%, list=15%, signal=40%	RAD51/CDKN1A/XRCC6/BLM/XRCC5/BRCA2/THBD/BRCC3/XRCC4/LIG4/NIPBL/ERCC8/ERCC1/ANXA1/CASP3
GOBP	NEGATIVE REGULATION OF PRODUCTION OF MOLECULAR MEDIATOR OF IMMUNE RESPONSE	39	0.476771	1.59925	0.00763605	0.0369323	0.0257978	5281	tags=51%, list=25%, signal=38%	ARG1/JAK3/HMOX1/PRKDC/LILRB4/BST2/TNF/XCL1/IRAK3/CD96/HLA-F/LILRB1/IL10/FOXP3/PARP3/CR1/IL33/TBX21/IFNA2/SPINK5
GOBP	NUCLEAR ENVELOPE ORGANIZATION	52	0.446802	1.6014	0.00761541	0.036859	0.0257466	4021	tags=44%, list=19%, signal=36%	CCNB1/CDK1/CCNB2/PPP2CA/ZMPSTE24/PLK1/PPP2R2A/TOR1A/REEP4/VRK1/TARDBP/NDEL1/NSFL1C/NUP155/LEMD2/NEK6/ANKLE2/PPP2R1A/CNEP1R1/TOR1B/EMD/CHMP2A/NUP93
GOBP	ENDOPLASMIC RETICULUM TO CYTOSOL TRANSPORT	28	0.529631	1.66169	0.00760711	0.0368454	0.0257371	5184	tags=61%, list=25%, signal=46%	VCP/HM13/UFD1/SEC61B/BCAP31/EDEM1/DERL2/AUP1/EDEM2/UBAC2/TMEM129/NPLOC4/YOD1/UBE2J1/HSP90B1/SELENOS/DERL1
GOBP	CARDIAC VENTRICLE DEVELOPMENT	113	-0.333807	-1.45826	0.00760138	0.0368442	0.0257363	4733	tags=35%, list=23%, signal=27%	SEMA3C/WNT11/HEY1/NPRL3/MED1/TMEM65/TGFB2/KCNK2/SAV1/FOXC2/PPP1R13L/BMP4/ROBO2/HES1/JAG1/MATR3/TBX3/LMO4/SOX4/SLIT2/NOG/CPE/NPY5R/SLIT3/DSP/FOXC1/FGFR2/BMPR1A/MEF2C/MYOCD/PDE2A/RBPJ/MDM4/TGFBR2/ZFPM2/TNNC1/TPM1/TGFBR3/GATA3
GOBP	CELL DIFFERENTIATION INVOLVED IN METANEPHROS DEVELOPMENT	25	-0.530995	-1.71456	0.00753622	0.0365548	0.0255341	4763	tags=52%, list=23%, signal=40%	FAT4/PDGFB/LGR4/BMP4/WWTR1/YAP1/ADIPOQ/LIF/GREM1/POU3F3/LAMB2/CD34/OSR1
GOBP	REGULATION OF LEUKOCYTE MIGRATION	194	0.32062	1.39051	0.00751423	0.0364744	0.025478	4773	tags=37%, list=23%, signal=28%	C10orf99/WNT5A/NOD2/CCL20/C1QBP/MYD88/S100A7/PYCARD/CCR7/CXCL13/PTAFR/SMPD3/CXCL10/CXCL8/CCL4/ADAM17/S100A14/RHOH/MIF/CCL2/LYN/HMOX1/SLAMF8/DEFB124/CCL8/SELE/RAC2/IL6/ITGA4/RIPK3/LGALS9/CCL7/CCL19/CXCL17/IL23A/DOCK8/OXSR1/ADAM10/ADAM8/FADD/WASL/RHOG/BDKRB1/CCL5/TNF/TREM2/XCL1/CCR1/ANXA1/ICAM1/CCR2/GCSAM/SELP/ST3GAL4/LGMN/TMEM102/P2RX4/SERPINE1/CD300A/MSN/THY1/GPSM3/C5AR2/AKIRIN1/C3AR1/CXCR3/IL33/…
GOBP	REGULATION OF NEURON MIGRATION	37	-0.47505	-1.69043	0.00749407	0.0364029	0.025428	4590	tags=51%, list=22%, signal=40%	DAB2IP/SHTN1/SEMA3A/FLRT2/ULK4/IGSF10/LRIG2/PHACTR1/ARHGEF2/TNN/ERBB4/ZNF609/NRG3/GNRH1/SEMA6A/NEXMIF/RAPGEF2/FBXO31/SRGAP2
GOMF	ACTIVIN BINDING	15	-0.619019	-1.74271	0.00746608	0.0362932	0.0253514	3980	tags=53%, list=19%, signal=43%	SMURF1/ACVR2B/FSTL3/ACVRL1/TGFBR2/ACVR1B/FST/TGFBR3
GOMF	S ADENOSYLMETHIONINE DEPENDENT METHYLTRANSFERASE ACTIVITY	155	0.342943	1.45149	0.0074542	0.0362616	0.0253293	4688	tags=36%, list=22%, signal=28%	EZH2/SMYD2/WDR4/DIMT1/COMTD1/PRMT5/DNMT1/NOP2/FTSJ1/PRMT3/METTL6/METTL1/ICMT/TRMT10C/DNMT3B/TFB2M/PRMT6/SUV39H2/EMG1/COQ3/NSD2/NSUN2/RRP8/CMTR2/TRMT6/TRMT112/TPMT/SETD4/METTL8/LCMT1/CARNMT1/ANTKMT/CSKMT/DOT1L/MEN1/MECOM/ARMT1/PRMT1/MRM2/TRMT1/METTL4/EED/MRM3/THUMPD3/DNMT3A/FDXACB1/METTL22/BUD23/NSD1/PRMT2/METTL21EP/TRMT5/METTL5/NDUFAF7/SUV39H1/SETD9
GOBP	MUSCLE ORGAN MORPHOGENESIS	69	-0.374522	-1.50733	0.00739656	0.0360073	0.0251517	4332	tags=32%, list=21%, signal=25%	MED1/S1PR1/TGFB2/BMP2/EFEMP2/FOXC2/SHOX2/NOG/ACTC1/LIF/DSP/FOXC1/FGFR2/BMPR1A/ADARB1/WNT2/RBPJ/ZFPM2/MYLK/TNNC1/TPM1/TGFBR3
GOBP	EYE MORPHOGENESIS	140	-0.313796	-1.42037	0.00734734	0.0357936	0.0250024	3430	tags=28%, list=16%, signal=23%	NECTIN3/IFT172/COL8A1/MFAP2/MFSD2A/BMP4/RORB/TFAP2A/JAG1/AHI1/PTPRM/DIO3/NKD1/SOX8/TSKU/SP3/TWIST1/MFAP5/LRP6/NTRK2/COL8A2/PTN/RBP4/ZHX2/SKI/WNT2/ABI2/IFT122/BMP7/TFAP2B/EFEMP1/CDON/NOTCH2/GLI3/C12orf57/BCL2/MEIS1/BCAR3/WNT2B
GOBP	REGULATION OF SMOOTHENED SIGNALING PATHWAY	76	-0.383766	-1.57908	0.00731368	0.0356555	0.024906	5948	tags=51%, list=29%, signal=37%	KIF7/TTC23/GLI1/MGRN1/INTU/RAB34/SFRP1/PDCL/IFT81/IFT140/FBXL17/TXNDC15/FOXA1/KCTD6/PRKACB/C2CD3/PRRX1/BTRC/IFT172/TCTN1/ENPP1/DYNC2H1/SHOX2/EVC/CTNNA1/CIBAR1/GLIS2/TULP3/CREBBP/FGFR2/GPC3/MOSMO/IFT122/DLG5/PTCH1/GAS1/GLI2/GLI3/RORA
GOBP	ACTIVATION OF NF KAPPAB INDUCING KINASE ACTIVITY	18	0.612912	1.73812	0.00727909	0.0355126	0.0248062	4438	tags=50%, list=21%, signal=39%	CARD14/IRAK1/TNFRSF10A/TNFRSF10B/TNFSF15/CARD10/TRAF4/TRAF2/MALT1
GOBP	T HELPER CELL LINEAGE COMMITMENT	17	0.60994	1.70189	0.00727624	0.0355126	0.0248062	6750	tags=82%, list=32%, signal=56%	STAT3/IL12B/IL6/IL23A/BATF/IL12RB1/MTOR/TBX21/SLAMF6/IL6R/IRF4/TNFSF18/IL23R/LY9
GOBP	NEGATIVE REGULATION OF OSTEOBLAST DIFFERENTIATION	44	-0.438921	-1.61437	0.00725274	0.0354356	0.0247523	5583	tags=52%, list=27%, signal=38%	HDAC7/SFRP1/GDF10/BAMBI/TWIST2/CDK6/HDAC4/TOB1/CRIM1/LRP5/TNN/VEGFC/RORB/NOG/TWIST1/PPARG/GREM1/IGFBP5/SKI/SMAD3/PTCH1/NBR1/AXIN2
GOMF	VINCULIN BINDING	11	-0.684425	-1.75151	0.00724415	0.0354193	0.024741	3136	tags=73%, list=15%, signal=62%	PXN/CTNNA1/SORBS3/DAG1/SYNM/CORO2B/DMD/UTRN
GOBP	NEPHRIC DUCT DEVELOPMENT	13	-0.668905	-1.82152	0.00716126	0.0350396	0.0244757	3069	tags=69%, list=15%, signal=59%	EPHA7/WNT11/BMP4/AHI1/PKD2/GPC3/OSR1/PKD1/GATA3
GOBP	MODULATION BY SYMBIONT OF HOST CELLULAR PROCESS	23	0.566007	1.67993	0.00715985	0.0350396	0.0244757	3477	tags=48%, list=17%, signal=40%	KPNA2/ATG5/SERPINB9/ATG7/CASP8/TNIP1/KPNB1/SCRIB/CPSF4/PHB2/KPNA3
GOBP	REGULATION OF GLUCOSE IMPORT	53	-0.417414	-1.59671	0.00709754	0.0347785	0.0242933	2867	tags=32%, list=14%, signal=28%	ENPP1/INSR/LEP/ADIPOQ/RHOQ/PRKAG2/SLC25A27/GPC3/OSBPL8/PID1/KLF15/IRS1/PIK3R1/CREBL2/SORBS1/IRS2/MEF2A
GOBP	INTERSTRAND CROSS LINK REPAIR	54	0.449056	1.62665	0.00708109	0.0347232	0.0242547	3338	tags=33%, list=16%, signal=28%	UBE2T/VCP/RPA3/RAD51/FANCI/CENPX/RAD51AP1/FANCD2/CENPS/RNF168/NEIL3/FANCG/FAAP20/ERCC1/RNF8/EME1/RFWD3/MCM9
GOCC	SPINDLE POLE CENTROSOME	15	0.634816	1.71707	0.00707347	0.0347112	0.0242463	2583	tags=53%, list=12%, signal=47%	DLGAP5/AURKB/AURKA/NDE1/NPM1/SPOUT1/NUBP2/NSFL1C
GOBP	DNA LIGATION	15	0.635385	1.71861	0.00707347	0.0347112	0.0242463	5259	tags=73%, list=25%, signal=55%	POLB/RAD51/TOP2A/XRCC6/XRCC4/LIG4/APTX/TFIP11/PARP3/LIG1/APLF
GOCC	MICROTUBULE ORGANIZING CENTER ATTACHMENT SITE	11	-0.685208	-1.75351	0.00707269	0.0347112	0.0242463	2358	tags=64%, list=11%, signal=56%	CLMN/SYNE4/SUN2/SYNE2/SYNE3/SUN1/SYNE1
GOBP	NEGATIVE REGULATION OF NEURON DIFFERENTIATION	60	-0.397184	-1.54411	0.00706181	0.0347112	0.0242463	3524	tags=37%, list=17%, signal=31%	DLL1/IRX3/HMG20A/HEY1/MED1/MIB1/APP/HES1/DTX1/JAG1/ZNF536/SOX8/EIF4ENIF1/CNTN4/NEPRO/PBX1/GSK3B/ZHX2/BMP7/DIXDC1/GLI3/MEIS1
GOMF	VASCULAR ENDOTHELIAL GROWTH FACTOR RECEPTOR BINDING	12	-0.661476	-1.75264	0.00702826	0.0345904	0.0241619	5826	tags=83%, list=28%, signal=60%	CCDC88A/ITGB3/CD2AP/CDH5/DAB2IP/VEGFC/ITGA5/VEGFB/PGF/GREM1
GOBP	REGULATION OF MITOCHONDRIAL OUTER MEMBRANE PERMEABILIZATION INVOLVED IN APOPTOTIC SIGNALING PATHWAY	43	0.474497	1.62771	0.0069968	0.0344608	0.0240714	5111	tags=53%, list=24%, signal=40%	TFDP1/SLC25A5/GZMB/BAK1/NMT1/YWHAQ/SFN/BID/CASP8/TMEM14A/BOK/TP63/YWHAZ/BAX/HIP1R/TMEM102/MAPK8/GSK3A/ATP5IF1/CHCHD10/PMAIP1/MUL1/YWHAH
GOBP	PYRIMIDINE NUCLEOSIDE TRIPHOSPHATE METABOLIC PROCESS	22	0.567912	1.68114	0.00694657	0.0342385	0.0239162	1837	tags=36%, list=9%, signal=33%	UCK2/NME1/CTPS1/TYMS/ENTPD7/CMPK2/DTYMK/DCTPP1
GOCC	SYNAPTIC CLEFT	17	-0.59876	-1.73548	0.0069441	0.0342385	0.0239162	3449	tags=41%, list=17%, signal=34%	LAMA2/LGI1/CBLN1/NLGN1/APOE/LAMB2/LAMA5
GOBP	REGULATION OF MORPHOGENESIS OF AN EPITHELIUM	59	-0.402915	-1.56931	0.0069376	0.0342385	0.0239162	3622	tags=37%, list=17%, signal=31%	TACSTD2/WNT5B/LGR4/FGF1/ABL1/BMP4/AGT/NTN4/BTBD7/NKD1/NOG/SOX8/ESR1/PDGFA/EGF/LIF/GREM1/WNT2/BMP7/AR/WNT2B/GATA3
GOBP	TOLL LIKE RECEPTOR 9 SIGNALING PATHWAY	26	0.55565	1.70251	0.00689932	0.0340806	0.0238059	3931	tags=42%, list=19%, signal=34%	MYD88/IRAK2/RSAD2/IRAK1/TNIP2/EPG5/PTPN22/LILRA4/TLR8/PIK3AP1/IRAK4
GOBP	MACROPHAGE ACTIVATION INVOLVED IN IMMUNE RESPONSE	18	0.614193	1.74175	0.00689932	0.0340806	0.0238059	4807	tags=56%, list=23%, signal=43%	NMI/IFI35/IFNG/SBNO2/SYK/GRN/TREM2/TYROBP/IL33/TICAM1
GOBP	BINDING OF SPERM TO ZONA PELLUCIDA	41	0.483402	1.64547	0.00683601	0.0338176	0.0236221	3468	tags=24%, list=17%, signal=20%	CCT5/CCT2/CCT3/CCT7/ALDOA/TEX101/VDAC2/TCP1/CCT8/SPA17
GOMF	LIPOPOLYSACCHARIDE BINDING	29	0.536854	1.68466	0.00682963	0.0338109	0.0236175	4098	tags=45%, list=20%, signal=36%	LTF/PTAFR/TLR2/CD6/PSMA1/RNASE7/CAMP/HSPD1/LY96/TREM2/SELP/BPIFC/TRIL
GOBP	REGULATION OF ORGAN GROWTH	85	-0.367277	-1.53438	0.00679903	0.0336843	0.023529	4035	tags=34%, list=19%, signal=28%	KCNK2/PARP2/WWC3/SAV1/PTEN/FOXC2/VGLL4/ERBB4/JARID2/RGS2/YAP1/EDN1/STK3/NOG/LATS2/FOXC1/FGFR2/BMPR1A/PPARA/MEF2C/RBP4/WNT2/RBPJ/MAPK1/TGFBR2/ZFPM2/MEIS1/SOD1/TGFBR3
GOCC	INFLAMMASOME COMPLEX	16	0.638025	1.76676	0.0067964	0.0336843	0.023529	3769	tags=56%, list=18%, signal=46%	CASP4/PYCARD/CASP1/AIM2/CASP5/GSDMD/DHX33/NLRC4/NLRP3
GOBP	OLIGOPEPTIDE TRANSPORT	13	0.660608	1.71156	0.00678495	0.0336642	0.023515	4824	tags=62%, list=23%, signal=47%	SLC7A11/ABCC1/SLC15A1/SLC9A3R1/SLC15A3/GJA1/ABCC5/SLC15A4
GOBP	POSITIVE REGULATION OF NOTCH SIGNALING PATHWAY	53	-0.420212	-1.60742	0.00677736	0.0336514	0.023506	3048	tags=36%, list=15%, signal=31%	ROBO2/HES1/JAG1/YAP1/SNW1/IL6ST/CCN3/JAG2/TSPAN14/NEPRO/ENHO/CREBBP/TM2D3/ZMIZ1/RBPJ/NOTCH2NLA/KIT/EPN2/MAML2
GOBP	DISTAL TUBULE DEVELOPMENT	12	-0.66507	-1.76216	0.00677575	0.0336514	0.023506	3220	tags=50%, list=15%, signal=42%	KLHL3/JAG1/POU3F3/PKD2/TFAP2B/PKD1
GOMF	RNA HELICASE ACTIVITY	73	0.411527	1.55226	0.00666851	0.0331599	0.0231627	5778	tags=48%, list=28%, signal=35%	EIF4A3/DDX39A/IFIH1/DDX41/HELZ2/DDX28/DDX60/DDX60L/DDX56/BRIP1/DHX58/DDX52/AQR/DDX49/DHX33/SKIV2L/RAD54B/DDX21/DDX58/DDX19A/DHX32/DHX29/UPF1/DHX15/DDX46/DHX57/TDRD9/DHX34/DHX37/DDX20/SUPV3L1/DDX43/DDX23/DDX3X/DDX54
GOBP	NEGATIVE REGULATION OF LEUKOCYTE MEDIATED CYTOTOXICITY	21	0.587307	1.71167	0.00665538	0.0331191	0.0231342	5020	tags=62%, list=24%, signal=47%	SERPINB4/SERPINB9/IL7R/LGALS9/HLA-E/KLRD1/HLA-F/HLA-B/LILRB1/HLA-G/PTPRC/ARRB2/HLA-A
GOBP	ACTIVATED T CELL PROLIFERATION	42	0.483461	1.65024	0.00665454	0.0331191	0.0231342	4624	tags=48%, list=22%, signal=37%	CD24/CD274/PYCARD/ARG1/IL12B/RIPK3/LGALS9/IL23A/IL2RA/FADD/LILRB4/TNFSF9/CRTAM/SCRIB/IL12RB1/CASP3/FOXP3/EPO/BTN3A1/AGER
GOBP	NEGATIVE REGULATION OF LIPID METABOLIC PROCESS	88	-0.358379	-1.52835	0.00665146	0.0331191	0.0231342	4662	tags=39%, list=22%, signal=30%	ABCA2/PDGFB/DAB2IP/INSIG1/ERLIN2/SORL1/BMP2/PIP4K2A/GPER1/SLC27A1/NCOR1/MFSD2A/WASHC1/SIRT1/APOC1/APOD/PDGFA/ENHO/AKR1C3/DKK3/APOE/DGAT2/ORMDL1/PIBF1/PIK3IP1/ORMDL3/FBXW7/PIP4K2B/CRTC3/CCDC3/ADRA2A/SOD1/SERPINA12/ACADL
GOBP	IRON SULFUR CLUSTER ASSEMBLY	23	0.567102	1.68318	0.00664384	0.0331191	0.0231342	3788	tags=48%, list=18%, signal=39%	GLRX3/CIAPIN1/CIAO2A/HSPA9/NUBP1/CIAO2B/NDOR1/NUBP2/LYRM4/FXN/CIAO3
GOMF	4 IRON 4 SULFUR CLUSTER BINDING	40	0.48051	1.62175	0.0065784	0.0328333	0.0229346	5661	tags=50%, list=27%, signal=37%	CIAPIN1/RSAD2/NDUFS7/SDHB/NUBP1/BRIP1/ACO2/NDUFS8/DNA2/NDUFV1/NUBP2/NDUFS2/CIAO3/NDUFS1/POLD1/ETFDH/NTHL1/PPAT/PRIM2/CDK5RAP1
GOBP	PYRIMIDINE DEOXYRIBONUCLEOTIDE METABOLIC PROCESS	22	0.568192	1.68197	0.00656421	0.0327869	0.0229022	1935	tags=36%, list=9%, signal=33%	TYMP/UPP1/TYMS/CMPK2/DTYMK/TDG/DCTPP1/SMUG1
GOBP	RESPONSE TO UV	143	0.348249	1.45692	0.00654913	0.0327359	0.0228666	4890	tags=42%, list=23%, signal=32%	PCLAF/SERPINB13/PBK/AURKB/IVL/PCNA/RUVBL2/BAK1/MAPK13/HUS1/EIF2S1/MMP9/FEN1/BCL3/CDC25A/COPS9/DTL/MYC/MMP1/IL12B/CDKN1A/GPX1/UBE2A/ST20/BRCA2/SMPD1/NOC2L/CARD16/NPM1/ATF4/RAD18/TRIAP1/MEN1/TMEM161A/ERCC8/PML/BAX/ERCC1/PARP1/CASP3/PRKCD/OPN3/POLD3/KDM1A/DCUN1D3/MAPK8/CDKN2D/ATR/HYAL3/TIPIN/POLD1/MMP3/NEDD4/TYR/CASP9/BRSK1/SPRTN/USP28/RHNO1/OPN5
GOBP	T CELL DIFFERENTIATION INVOLVED IN IMMUNE RESPONSE	71	0.414499	1.55226	0.00653054	0.0326673	0.0228186	3986	tags=39%, list=19%, signal=32%	ZC3H12A/NFKBIZ/IL4R/ENTPD7/BCL3/STAT3/JAK3/IFNG/RELB/IL12B/IL6/LGALS9/CCL19/IL23A/BATF/GPR183/CD86/EOMES/LEF1/SEMA4A/NFKBID/ANXA1/HLA-DRA/IL12RB1/NLRP3/MTOR/CD80/FOXP3
GOBP	POSITIVE REGULATION OF INTERLEUKIN 17 PRODUCTION	18	0.617312	1.7506	0.00651955	0.0326366	0.0227972	6750	tags=83%, list=32%, signal=56%	NOD2/MYD88/PRKCQ/SLC7A5/IL12B/IL6/IL23A/IL15/SPHK1/SLAMF6/CCL1/IL23R/IL21/TGFB1/LY9
GOMF	INTERLEUKIN 1 RECEPTOR BINDING	17	0.614274	1.71399	0.00650357	0.0325809	0.0227583	3931	tags=59%, list=19%, signal=48%	IL36G/MYD88/IL36RN/IL36A/TOLLIP/IL1B/IL1RN/IL36B/TRIP6/IRAK4
GOCC	ENDORIBONUCLEASE COMPLEX	30	0.5304	1.67343	0.00648646	0.0325194	0.0227153	4342	tags=50%, list=21%, signal=40%	TARBP2/HSD17B10/TRMT10C/RPP40/ZFP36/POP5/TSEN54/POP4/CLP1/TSEN34/POP1/POP7/RPP30/RPP38/TSEN2
GOBP	CARBOHYDRATE DERIVATIVE TRANSPORT	81	0.400167	1.5392	0.00648501	0.0325194	0.0227153	5022	tags=37%, list=24%, signal=28%	SLC5A1/SLC25A5/SLC35B1/ALOX12B/SLC28A3/ABCG1/GLTP/P2RY2/ATG5/SLC25A25/RFT1/VAMP8/SLC37A4/SLC37A2/SLC25A19/SLC19A1/SLC35A4/SLC35B4/SLC15A3/SLC35D2/SLC50A1/VLDLR/G6PC1/GJA1/CR1/SLC35A2/PLTP/SLC15A4/CLN3/SLC29A4
GOBP	ETHER BIOSYNTHETIC PROCESS	11	-0.688949	-1.76308	0.00647259	0.0324984	0.0227007	4689	tags=64%, list=22%, signal=49%	FASN/AGPS/PLA2G4C/LPCAT2/FAR1/GNPAT/CHPT1
GOBP	EPITHELIAL CELL PROLIFERATION	372	-0.258128	-1.31938	0.0064415	0.0323665	0.0226085	3663	tags=30%, list=18%, signal=25%	SAV1/AGGF1/SCARB1/BTRC/MAP2K5/TNFSF12/VASH2/PTEN/NRP1/LGR4/IFT172/VEGFC/IFT52/COL8A1/FGF1/EGR3/DLG1/SIRT1/BMP4/PTPRK/JCAD/HES1/PRKD1/RGCC/CXCL12/EGFL7/BCL11B/VEGFB/YAP1/PTPRM/STAT5A/LEP/MST1/NOG/CCN3/CD109/PRKCA/SRSF6/ZNF304/PGF/WDR48/LGR5/PURA/TWIST1/ESR1/FGF9/C6orf89/IRF6/DUSP10/PPARG/EGF/EGFR/KRT2/PGR/ACVRL1/FZD7/SYNJ2BP/APOE/FABP7/MTSS1/FGFR2/KLF9/TNMD/ZFP36L1/CDC73/BMPR1A/NR2F2/COL8A2/FGFR1/…
GOMF	AROMATIC AMINO ACID TRANSMEMBRANE TRANSPORTER ACTIVITY	10	0.712291	1.72012	0.00641372	0.032251	0.0225279	3694	tags=70%, list=18%, signal=58%	SLC7A1/SLC16A10/SLC7A5/SLC38A5/SLC3A2/SLC38A7/SLC36A4
GOCC	NUCLEAR ENVELOPE	445	0.279258	1.30763	0.00641056	0.032251	0.0225279	4196	tags=31%, list=20%, signal=25%	RAN/ATP5MF/IFI27/GCH1/JPT1/CLCA2/LRRC59/MX1/MAD2L1/LMNB2/VRK2/SMOX/CENPF/NUP37/APEH/VAPA/NUP210/ZMPSTE24/DTL/TXNL4A/RANBP1/DUSP2/TMPO/FBXW11/AEN/NUP88/GAPDH/NUP62CL/MRPS14/GTPBP4/FAM169A/MX2/BRIP1/MRPL19/HAX1/ALG14/RRP12/EBP/RRM1/NUP50/XPOT/RAC2/RCC1/NOC4L/HTATIP2/TOR1A/NUDT1/NXT1/CCND2/CETN2/TOR3A/MAD2L1BP/NPC1/LMNB1/CSE1L/RANGAP1/LYPLA1/ACKR2/RAE1/MVP/TOR4A/BNIP3/SEC13/PTGER3/BOK/DCTN5/KPNB1/SU…
GOBP	METANEPHRIC TUBULE DEVELOPMENT	21	-0.570811	-1.75576	0.00638988	0.0321793	0.0224778	3438	tags=52%, list=16%, signal=44%	LGR4/WNT7B/HES1/WWTR1/YAP1/SOX8/LIF/POU3F3/PKD2/OSR1/PKD1
GOMF	EXTRACELLULAR MATRIX BINDING	54	-0.423466	-1.62055	0.00638726	0.0321793	0.0224778	3784	tags=39%, list=18%, signal=32%	ELN/ITGAV/ADAMTS5/BCAM/SMOC2/NTN4/GPC1/FBLN2/CLEC14A/SSC5D/SLIT2/ITGB1/LGALS1/CD248/DAG1/DCN/SPARCL1/ITGA9/LGALS3/OLFML2A/TGFBI
GOBP	REGULATION OF EPITHELIAL TO MESENCHYMAL TRANSITION	92	-0.366339	-1.56853	0.006335	0.0319509	0.0223182	5115	tags=48%, list=25%, signal=36%	GLIPR2/SMAD4/FOXA1/ALX1/BAMBI/DAB2IP/PHLDB2/CTNNB1/TGFB2/BMP2/LDLRAD4/USF3/PTEN/GCNT2/SPRED2/BMP4/DAB2/RGCC/DACT3/JAG1/WWTR1/CLASP1/NOG/SPRED1/EFNA1/TWIST1/FOXC1/GREM1/PHLDB1/ELL3/SDCBP/DAG1/SMAD3/FERMT2/TGFB1I1/TGFBR2/BMP7/IL17RD/SPRY1/TCF7L2/ZNF703/SPRY2/AXIN2/GATA3
GOBP	RIBONUCLEOSIDE CATABOLIC PROCESS	22	0.56904	1.68448	0.00630992	0.0318483	0.0222465	2659	tags=32%, list=13%, signal=28%	UPP1/PNP/AHCY/APOBEC3B/HPRT1/XDH/ADA2
GOCC	ENDOPLASMIC RETICULUM GOLGI INTERMEDIATE COMPARTMENT	124	0.366731	1.51495	0.00630179	0.0318312	0.0222346	3424	tags=26%, list=16%, signal=22%	GJB2/CTSC/PRRG4/RER1/SERPINA1/ERP44/TGFA/CNIH4/AREG/HSPA5/TAP1/PTPN2/TAP2/LMAN2/BCAP31/YIF1A/YIF1B/CNIH1/P4HB/GNPNAT1/YKT6/TRAPPC5/LAMP5/TMED5/SURF4/PDIA6/TAPBP/PROM1/MYDGF/LMAN1/TMEM199/TMED7
GOMF	STEROID BINDING	99	-0.345821	-1.49089	0.00628182	0.0317541	0.0221808	4188	tags=34%, list=20%, signal=28%	INSIG1/ERLIN2/PMP2/PAQR6/SOAT1/GPER1/HSD11B2/PGRMC1/OSBPL5/RORC/ESRRG/NR1H3/APOD/CYP3A4/ESR1/PGR/OSBP/OSBPL9/CD81/OSBPL8/SCARB2/IRX5/STAR/OSBPL1A/PTCH1/ATP1A2/NR3C1/AR/CAV1/INSIG2/NR3C2/HSD11B1/PGRMC2/RORA
GOBP	POSITIVE REGULATION OF CELLULAR AMIDE METABOLIC PROCESS	147	0.346482	1.45762	0.00627333	0.0317351	0.0221675	3964	tags=36%, list=19%, signal=29%	NOD2/EIF4A3/C1QBP/PTAFR/EIF6/KRT17/SMPD3/BCL3/IFNGR1/CDC123/RPS6KB2/TARBP2/FASTKD2/TRUB2/PYM1/IFNG/ABCG1/TRMT10C/COA3/UQCC2/IL6/MPV17L2/POLR2G/PRKDC/NPM1/ELAVL1/POLR2D/JMJD4/SMPD2/EIF4G2/PASK/TNFRSF1A/MRPS27/LARP1/RCC1L/CCL5/NAT10/TNF/PKM/EIF4G1/CASP3/PRKCD/UHMK1/YTHDF2/EIF2B5/DAZL/EIF5A/FASTKD3/CDK4/DHX29/GSK3A/MTOR/UQCC1
GOBP	ENDOCRINE HORMONE SECRETION	43	-0.452418	-1.66486	0.00627292	0.0317351	0.0221675	6096	tags=56%, list=29%, signal=40%	RAB8B/INHBA/TACR2/PTPN11/SMAD4/GDF9/C1QTNF3/CRY1/BMP6/TRPV6/TAC1/GAL/GNAS/AGT/TBX3/LEP/SELENOM/RAB11FIP5/RAB11FIP3/FOXD1/FZD4/AGTR1/INHBB/GATA3
GOBP	PYRIMIDINE NUCLEOSIDE MONOPHOSPHATE METABOLIC PROCESS	18	0.618814	1.75486	0.00626699	0.0317351	0.0221675	4210	tags=44%, list=20%, signal=36%	TYMP/UPP1/UCK2/TYMS/UMPS/DCTD/CAD/NT5C
GOBP	NEGATIVE REGULATION OF ACTIN FILAMENT BUNDLE ASSEMBLY	30	-0.503074	-1.70509	0.00626265	0.0317351	0.0221675	4553	tags=53%, list=22%, signal=42%	PAK2/PHLDB2/S1PR1/FRMD7/PRKN/TACSTD2/WASF2/CLASP1/MET/SHANK3/ARHGAP6/MYOC/CORO2B/PIK3R1/DLC1/CGNL1
GOBP	CELL MIGRATION INVOLVED IN SPROUTING ANGIOGENESIS	52	-0.424664	-1.61813	0.00626024	0.0317351	0.0221675	4235	tags=48%, list=20%, signal=38%	KDR/MIA3/HDAC9/HDAC5/MAP2K5/FOXC2/NRP1/EGR3/ABL1/SRPX2/JCAD/CLEC14A/SLIT2/SPRED1/MMRN2/GREM1/KLF4/AKT3/RHOJ/STARD13/MEOX2/FBXW7/GATA2/MAP3K3/EFNB2
GOBP	DETECTION OF EXTERNAL BIOTIC STIMULUS	22	0.570045	1.68746	0.0062465	0.0317188	0.0221561	5020	tags=59%, list=24%, signal=45%	NOD2/CLEC7A/PGLYRP4/TLR2/PGLYRP2/LY96/TREM2/PGLYRP3/NLRC4/HLA-B/CD1D/TLR1/HLA-A
GOBP	REGULATION OF SKELETAL MUSCLE CELL DIFFERENTIATION	18	-0.59266	-1.72129	0.00621727	0.0315943	0.0220691	5071	tags=67%, list=24%, signal=51%	RBM24/TBX1/NR1D2/MSTN/GPC1/ARNTL/DDX17/MEF2C/MYOCD/NLN/EPHB1/CYP26B1
GOBP	SMOOTHENED SIGNALING PATHWAY INVOLVED IN DORSAL VENTRAL NEURAL TUBE PATTERNING	11	-0.690412	-1.76683	0.0062154	0.0315943	0.0220691	1698	tags=64%, list=8%, signal=58%	TBC1D32/PRKACB/TULP3/PTCH1/WDR19/GLI2/GLI3
GOBP	CYTOKINETIC PROCESS	37	0.505301	1.68191	0.00619305	0.0315189	0.0220164	3946	tags=41%, list=19%, signal=33%	KIF20A/CEP55/AURKB/ECT2/RACGAP1/ANLN/KIF20B/BIN3/PDCD6IP/MYH9/CHMP5/CHMP1B/CHMP6/CHMP1A/CHMP2A
GOBP	ORGANIC HYDROXY COMPOUND BIOSYNTHETIC PROCESS	235	0.320864	1.41956	0.00617064	0.0314286	0.0219534	4693	tags=36%, list=22%, signal=28%	RAN/CDH3/WNT5A/SLC7A11/GCH1/PTS/GOT1/MOXD1/PTAFR/CYP7B1/SPTLC2/IPPK/PNPO/SRD5A3/CYB5R2/SQLE/PLCG2/CH25H/CYP27B1/IFNG/ITPKC/NFKB1/ABCG1/HSD17B10/OSBPL2/IMPA2/STARD4/EBP/HSD17B4/PCK2/CTNS/DHFR/GIPC1/PMEL/SEC14L2/PLEK/LPCAT3/ARV1/KPNB1/NSDHL/PARK7/P2RY1/FAXDC2/ACACA/SREBF2/GPR37/TNF/LBR/G6PD/HMGCR/PSAT1/TYRP1/AGK/P2RY6/OPN3/PGP/SPTLC1/SPTLC3/CD244/PPIP5K1/CYP2R1/SREBF1/HSD17B1/AVPR1B/SPHK1/BAAT/NTSR…
GOBP	REGULATION OF BRANCHING INVOLVED IN URETERIC BUD MORPHOGENESIS	20	-0.582166	-1.76722	0.00614308	0.031312	0.0218719	3622	tags=45%, list=17%, signal=37%	HOXB7/TACSTD2/LGR4/BMP4/AGT/NOG/SOX8/GREM1/WNT2B
GOBP	VENTRAL SPINAL CORD DEVELOPMENT	41	-0.471034	-1.70658	0.00613874	0.031312	0.0218719	3421	tags=27%, list=16%, signal=22%	IFT172/TCTN1/LMO4/SOX4/DYNC2H1/ZC4H2/HOXC10/GATA2/PTCH1/GLI2/GLI3
GOBP	ACTIN FILAMENT ORGANIZATION	418	-0.248884	-1.27832	0.00612772	0.0312812	0.0218504	3843	tags=28%, list=18%, signal=23%	ARHGEF10L/INPPL1/FAM171A1/ELN/TRIOBP/DMTN/PIK3CA/PRKN/TACSTD2/ARHGEF2/RDX/NRP1/PRKCE/TAC1/ASAP3/PXN/DLG1/WASHC1/ABL1/MICAL1/CCN2/TENM1/WASF2/RGCC/TMSB4X/CXCL12/FAM107A/SWAP70/CLASP1/S100A10/SLIT2/ELMO2/ARHGEF15/KANK4/RHOBTB1/RAPGEF3/ADD1/MET/ACTC1/NEDD9/FMN1/TMOD2/WASF3/ZBED3/ACTA1/CTNNA1/ALMS1/FER/PLEKHH2/TMSB15B/SHANK3/TESK1/HIP1/DSTN/ARHGAP12/BIN1/VILL/SORBS3/ARHGAP35/TTC17/PFN2/SPTAN1/RHOB/SO…
GOBP	NEGATIVE REGULATION OF ADAPTIVE IMMUNE RESPONSE	51	0.45145	1.61723	0.0061173	0.0312518	0.0218299	4902	tags=43%, list=23%, signal=33%	ZC3H12A/NOD2/IL4R/SAMSN1/SUSD4/ARG1/JAK3/IL7R/LILRB4/XCL1/KLRD1/CLEC4G/HLA-F/LILRB1/HLA-G/FOXP3/PARP3/CR1/PTPRC/IL33/TBX21/IFNA2
GOBP	LEYDIG CELL DIFFERENTIATION	10	-0.700839	-1.75528	0.0061163	0.0312518	0.0218299	2491	tags=50%, list=12%, signal=44%	MGST1/PLEKHA1/PDGFRA/AR/CCND1
GOCC	9PLUS0 NON MOTILE CILIUM	120	-0.327308	-1.44243	0.00611324	0.0312518	0.0218299	5473	tags=33%, list=26%, signal=25%	CCDC66/RPGR/CEP250/RGS9BP/CEP290/IFT140/OCRL/TOPORS/NPHP1/VCAN/NAPEPLD/IMPG1/KIF17/BBS7/PDE6A/SPATA7/GNAQ/KIAA1549/SHANK2/IFT52/MYRIP/NPHP4/SEPTIN2/LCA5/MERTK/GNB1/DHRS3/IQCB1/CFAP410/DYNLL2/TULP3/GNA11/ARL3/IFT122/CNGA1/C1orf115/WDR19/PHYH/MAP1B/CDHR1
GOCC	TERTIARY GRANULE	162	0.342429	1.4584	0.00610735	0.0312518	0.0218299	5459	tags=41%, list=26%, signal=30%	TCN1/LTF/LRG1/CSTB/ILF2/CXCL1/GGH/PTAFR/PRSS3/MMP9/FPR1/CD53/RAP2B/ALDOA/LAMTOR2/DBNL/CD177/LYZ/PLAU/DYNLL1/CNN2/NIT2/ITGB2/CTSD/VAMP8/ADAM10/CLEC4C/CD58/GPR84/GSDMD/ADAM8/CAMP/CTSS/SLC2A3/VPS35L/QSOX1/CYFIP1/CYBA/KCNAB2/LAMTOR3/LILRB2/B2M/LAIR1/TBC1D10C/DIAPH1/ATAD3B/HP/CD300A/PTX3/TMC6/SERPINB12/CR1/OLR1/CANT1/FCER1G/SERPINB6/ATP6V0C/MCEMP1/STXBP2/CYBB/FPR2/ITGAX/SERPINB10/LAMTOR1/RAP2C/TMEM179B
GOBP	NUCLEOSIDE DIPHOSPHATE METABOLIC PROCESS	150	0.357887	1.50875	0.00608834	0.0311987	0.0217928	4978	tags=40%, list=24%, signal=31%	ENO1/TPI1/PGAM1/PGK1/AK2/HK2/NME1/TIGAR/ENTPD7/CMPK2/HIF1A/EIF6/DTYMK/NUP37/TJP2/NUP210/LDHA/ALDOA/FOXK2/NUP88/IFNG/GAPDH/NUDT5/GPI/AK1/GALK1/NUP50/RAE1/DHTKD1/SEC13/PFKFB2/PFKP/NUP155/CASK/PKM/NDC1/PFKFB4/ADPGK/NUP188/PRKAG1/NUP85/NUP205/CARD11/OGDHL/ENO3/PGK2/NME7/NUP58/NUP107/NUP93/POM121/HK3/NUP160/ZBTB7A/NUP35/ENTPD3/NUP42/ENTPD5/BPGM/NME6
GOBP	NEGATIVE REGULATION OF PROTEIN POLYUBIQUITINATION	10	0.715879	1.72878	0.00608481	0.0311987	0.0217928	3725	tags=60%, list=18%, signal=49%	TRIP12/PPIA/OTUB2/PLAA/OTUB1/PARP10
GOBP	REGULATION OF T CELL CHEMOTAXIS	15	0.64233	1.7374	0.00608481	0.0311987	0.0217928	3616	tags=73%, list=17%, signal=61%	WNT5A/S100A7/CXCL13/CXCL10/ADAM17/OXSR1/ADAM10/CCL5/XCL1/CCR2/TMEM102
GOBP	DNA DAMAGE RESPONSE DETECTION OF DNA DAMAGE	39	0.485473	1.62843	0.0060728	0.0311904	0.021787	4746	tags=51%, list=23%, signal=40%	MRPS11/PCNA/RPA3/DTL/PNKP/POLD2/RBX1/RFC2/RFC3/MRPS35/RAD18/POLD4/PARP1/RFC4/POLD3/RPA1/POLD1/MRPS26/DNAJA1/RFC5
GOBP	POSITIVE REGULATION OF CHROMOSOME SEGREGATION	13	0.665556	1.72438	0.00606327	0.0311653	0.0217695	3567	tags=69%, list=17%, signal=57%	CCNB1/AURKB/CDC6/CDT1/RCC2/MAD2L1BP/RAD18/SMC6/BECN1
GOMF	ANTIGEN BINDING	67	0.436456	1.62237	0.0060122	0.0309265	0.0216026	5325	tags=46%, list=26%, signal=35%	TAP1/SLC7A5/TAP2/FCN1/CD48/IL7R/ITGA4/LAG3/SLAMF1/HLA-E/TAPBP/KLRD1/CD1B/HLA-DRA/PPP2R1A/HLA-F/LILRA2/HLA-B/IGHV7-81/HLA-G/TRDC/CD1D/FCN3/CLEC4M/CD40/HLA-DQB1/HLA-A/CD209/HLA-DPB1/HLA-C/SLC7A8
GOBP	REGULATION OF T CELL APOPTOTIC PROCESS	33	0.524705	1.70573	0.0059764	0.0307659	0.0214905	2825	tags=48%, list=14%, signal=42%	CD274/WNT5A/PRELID1/PRKCQ/HIF1A/IDO1/JAK3/ZC3H8/IL7R/RIPK3/LGALS9/CD27/DOCK8/ADAM8/FADD/CCL5
GOBP	HEART PROCESS	277	-0.277008	-1.36154	0.00596862	0.0307494	0.0214789	3508	tags=25%, list=17%, signal=21%	EDN3/PIK3CA/NEDD4L/NOS1/TAC1/NPR1/PPP1R13L/CALM2/DLG1/CCN2/ATP2A3/AGT/KCND2/CACNA1H/ABCC9/BVES/RYR3/KCNH2/RGS2/CELF2/WWTR1/VEGFB/YAP1/NPR2/ATP2B1/EDN1/ASPH/CACNB2/ACTC1/ADRB1/FXYD1/FGF13/SGCD/HSPB7/DSG2/ANK2/DSP/BIN1/POPDC2/SLC8A1/THRA/AKAP13/ADRA1A/SMAD5/ATP2B4/PLN/CACNA2D2/AKAP9/ITPR3/SCN3B/TRPC1/TNNC1/ATP1A2/FYN/DES/TNNI2/CASQ2/GPD1L/CACNA2D1/DMD/TPM1/FXYD6/GSN/CAV1/SGCG/SOD1/CYP2J2/MEF2A
GOBP	SPINAL CORD MOTOR NEURON CELL FATE SPECIFICATION	10	-0.703166	-1.76111	0.00594758	0.0306645	0.0214196	1373	tags=30%, list=7%, signal=28%	HOXC10/GLI2/GLI3
GOBP	REGULATION OF ANIMAL ORGAN FORMATION	25	-0.537435	-1.73536	0.00589981	0.0304415	0.0212639	3925	tags=48%, list=19%, signal=39%	WNT11/BMP2/FGF1/BMP4/ROBO2/DKK1/HOXA11/WNT2/BMP7/SPRY1/AR/WNT2B
GOBP	GLOMERULAR EPITHELIUM DEVELOPMENT	24	-0.535081	-1.69461	0.0058086	0.029994	0.0209513	3538	tags=62%, list=17%, signal=52%	FOXC2/BMP4/JAG1/ASXL1/PECAM1/ADIPOQ/FOXC1/PODXL/LAMB2/IQGAP1/PTPRO/CD34/KLF15/MAGI2/NOTCH2
GOBP	REGULATION OF ALTERNATIVE MRNA SPLICING VIA SPLICEOSOME	56	-0.416417	-1.61137	0.00577378	0.0298371	0.0208417	5120	tags=45%, list=25%, signal=34%	THRAP3/CELF6/RBM24/CELF1/KHDRBS3/RBM5/CELF5/RBM25/RBM15B/RBM11/RBM4/CELF2/SRSF6/NSRP1/MBNL2/DYRK1A/DDX17/MBNL1/FAM172A/HNRNPA1/RBFOX2/RBM8A/FXR1/NOVA1/YTHDC1
GOBP	NEUROTROPHIN SIGNALING PATHWAY	38	-0.461981	-1.65169	0.0057686	0.0298333	0.020839	3623	tags=37%, list=17%, signal=31%	SOS1/RAP1A/AGT/NTF4/NDN/NTF3/NTRK2/KIDINS220/ZDHHC17/RAPGEF2/TMEM108/MAGI2/SPRY1/SPRY2
GOCC	CORNIFIED ENVELOPE	38	0.490784	1.64387	0.00576433	0.0298333	0.020839	763	tags=29%, list=4%, signal=28%	DSC2/PI3/DSG3/TGM1/SPRR1B/SPRR3/CNFN/SPRR1A/IVL/CSTA/SPRR2G
GOBP	DEOXYRIBONUCLEOSIDE TRIPHOSPHATE METABOLIC PROCESS	15	0.644877	1.74429	0.00575591	0.0298136	0.0208252	1988	tags=53%, list=10%, signal=48%	NUDT15/TYMS/CMPK2/DTYMK/ITPA/ADK/DCTPP1/NUDT1
GOBP	LYMPHOCYTE APOPTOTIC PROCESS	70	0.427371	1.59717	0.00575275	0.0298136	0.0208252	3006	tags=37%, list=14%, signal=32%	CD274/WNT5A/PRELID1/TNFRSF21/PRKCQ/AURKB/BAK1/HIF1A/IDO1/JAK3/LYN/ZC3H8/IL7R/RIPK3/LGALS9/CD27/DOCK8/NOC2L/CD3G/IL2RA/ADAM8/FADD/CCL5/DNAJA3/FASLG/BAX
GOBP	REGULATION OF BLOOD PRESSURE	171	-0.300971	-1.40586	0.00572631	0.0297061	0.0207502	4002	tags=29%, list=19%, signal=23%	RARRES2/LRP5/RAMP2/EDN3/HSD11B2/TRHDE/NOS1/SCPEP1/VEGFC/TAC1/NPR1/AGT/CTSG/LVRN/ECE1/NPR2/LEP/ATP2B1/EDN1/ADIPOQ/F2R/ADRB1/PPARG/ACVRL1/MECP2/ARHGAP42/GAS6/NISCH/NR2F2/PPARA/P2RX1/ADRA1A/CAMK2N1/NPY1R/PTPRO/SMAD3/KLK1/CD34/ACTA2/ATP1A2/CORO2B/AGTR1/LNPEP/AR/TPM1/POSTN/SOD1/DDAH1/ADRB2
GOBP	TAIL ANCHORED MEMBRANE PROTEIN INSERTION INTO ER MEMBRANE	16	0.641547	1.77651	0.00570019	0.0295934	0.0206715	5028	tags=69%, list=24%, signal=52%	UBL4A/EMC6/EMC3/EMC8/EMC9/GET3/EMC1/EMC7/SGTA/EMC4/EMC10
GOBP	LUTEINIZATION	10	-0.706016	-1.76825	0.00569449	0.0295867	0.0206668	729	tags=40%, list=3%, signal=39%	FZD4/STAT5B/PLEKHA1/PDGFRA
GOBP	MITOTIC CHROMOSOME CONDENSATION	15	0.646264	1.74804	0.00569012	0.0295867	0.0206668	3800	tags=53%, list=18%, signal=44%	NUSAP1/CDCA5/NCAPH/NCAPG/SMC2/SMC4/NCAPD2/CHMP1A
GOBP	CELLULAR RESPONSE TO RADIATION	183	0.336463	1.44882	0.00568258	0.0295705	0.0206555	4910	tags=38%, list=24%, signal=30%	IFI16/H2AX/PBK/AURKB/PCNA/RUVBL2/BAK1/NMT1/MAPK13/HUS1/RAD51/METAP1/EIF2S1/MMP9/HSPA5/ECT2/CDC25A/COPS9/ZMPSTE24/RAD51AP1/MYC/FIGNL1/MMP1/CDKN1A/XRCC6/BLM/ST20/XRCC5/SMPD1/METAP2/NOC2L/HRAS/CARD16/NPM1/CHEK2/ATF4/TRIAP1/INTS7/LIG4/SWI5/NIPBL/FBXO4/TMEM161A/BAX/ERCC1/GADD45A/PARP1/MDM2/PRKCD/OPN3/POLD3/KDM1A/MAPK14/ELK1/ATR/HYAL3/TLK2/POLD1/MMP3/TRPM1/NEDD4/DNM2/TANK/CASP9/USP28/GRB2/GRK4/RHNO1/OP…
GOBP	BIOMINERALIZATION	149	-0.315195	-1.43375	0.00567213	0.029539	0.0206335	4004	tags=33%, list=19%, signal=27%	RFLNB/ACVR2B/BMP2/BMP6/ATRAID/LGR4/FGFR3/FOXO1/BMP4/ADGRV1/PTH1R/TFAP2A/ENPP1/LOX/DDR2/ZBTB40/LEP/ATP2B1/ANO6/FBLN7/TWIST1/OMD/KLF10/P2RX7/GPM6B/FGFR2/GREM1/MGP/GAS6/BMPR1A/PPARA/ROR2/GPC3/PTN/MEF2C/SLC8A1/ROCK2/BMPR1B/SMAD3/WDR72/BMP7/ASPN/OSR1/NBR1/ANKH/TUFT1/OSR2/AXIN2/ADRB2
GOMF	OXIDOREDUCTASE ACTIVITY ACTING ON CH OH GROUP OF DONORS	124	0.369004	1.52434	0.00565547	0.0294751	0.0205889	3099	tags=29%, list=15%, signal=25%	AKR1B10/IDH3A/BDH1/GFUS/PGD/RDH10/DHRS9/SDR9C7/MDH2/IMPDH1/LDHA/CBR3/RDH16/RDH12/ADH7/PTGR1/DHRS13/HSD17B10/HSD17B2/IDH2/IDH3B/HSD17B4/CBR1/ALDH3A1/VKORC1/MDH1/SDR16C5/NSDHL/PHGDH/L2HGDH/ME1/KCNAB2/SDR42E1/CRYL1/G6PD/HMGCR
GOBP	REGULATION OF CELL SHAPE	147	-0.313201	-1.41901	0.0056338	0.029385	0.0205259	2596	tags=28%, list=12%, signal=25%	BVES/SEMA3E/S100A13/CFAP410/RHOBTB1/RHOQ/WASF3/PARVA/PALM2AKAP2/PTK2/ARHGAP35/ITGA7/PHIP/RHOB/FN1/SEPTIN7/EPB41/PTN/SH3KBP1/RHOJ/DAG1/CFDP1/FERMT2/SYNE3/MYH14/WDPCP/MKLN1/PLXNA2/PALMD/LPAR1/FYN/FGD4/EPS8/PALM/MYH10/FGD5/DLC1/TPM1/KIT/DNMBP/RHOBTB3
GOBP	CELLULAR RESPONSE TO CALCIUM ION	77	-0.379585	-1.56582	0.00562897	0.0293826	0.0205242	3727	tags=36%, list=18%, signal=30%	DMTN/CPNE2/CAPN3/SYT1/CLIC4/ADGRV1/RASA4/CPNE8/RYR3/EDN1/NLGN1/FOS/CPNE3/ADD1/JUND/CACYBP/AKR1C3/ITPKB/PRKAA2/PKD2/MEF2C/SYT17/IQGAP1/BRAF/SYT8/MEF2A/EEF2K/CHP2
GOBP	PEPTIDE CROSS LINKING	34	0.510219	1.67495	0.00561045	0.0293087	0.0204726	1088	tags=26%, list=5%, signal=25%	PI3/TGM1/SPRR1B/SPRR3/SPRR1A/IVL/TGM3/CSTA/SPOCK2
GOBP	REGULATION OF VIRAL TRANSCRIPTION	42	0.490514	1.67432	0.00559629	0.0292575	0.0204368	3714	tags=45%, list=18%, signal=37%	TRIM14/POLR2H/POLR2F/TARBP2/NELFCD/TRIM62/TRIM21/IFITM3/POLR2L/ZFP36/POLR2G/POLR2D/POLR2E/UBP1/NELFE/CDK9/POLR2I/TRIM11/SUPT4H1
GOMF	ADP BINDING	38	0.492588	1.64991	0.0055254	0.0289094	0.0201937	4407	tags=61%, list=21%, signal=48%	PGK1/RUVBL1/VCP/RUVBL2/TAP1/ABCG1/P2RY1/CHORDC1/ME1/LONP1/PKM/ATP1A1/MYH9/ATP5F1D/MIEF1/ATP5F1A/PRKAG1/GCLC/PGK2/PRPS2/MYO6/PPP5C/MYO7A
GOBP	POSITIVE REGULATION OF PROTEIN LOCALIZATION TO NUCLEUS	85	0.400499	1.55068	0.00552473	0.0289094	0.0201937	3991	tags=42%, list=19%, signal=34%	ZC3H12A/RAN/PARP9/CDK1/CCT5/DTX3L/CCT2/ZPR1/CCT3/ECT2/CCT7/IFNG/LAMTOR5/PINX1/BAG3/PLK1/LIMK2/SESN2/TFRC/TARDBP/TCP1/PARK7/PIK3R2/DKC1/HCLS1/CCT6A/CCT8/PARP1/MCRS1/PRKCD/NUTF2/CARD10/HDAC3/CDH1/JUP/MAPK14
GOBP	IMP METABOLIC PROCESS	14	0.659218	1.74171	0.00550256	0.0288348	0.0201415	1143	tags=43%, list=5%, signal=41%	GART/ATIC/NT5C2/HPRT1/AMPD3/ADSL
GOBP	REGULATION OF EPIDERMIS DEVELOPMENT	66	0.429552	1.59936	0.00546466	0.0286585	0.0200185	2810	tags=35%, list=13%, signal=30%	SERPINB13/PPARD/MACROH2A1/PRKCH/EZH2/TMEM79/TRIM16/ZBED2/IL20/SFN/CTSL/CYP27B1/CBFB/SULT2B1/OVOL2/ZFP36/ETV4/GRHL1/TP63/AQP3/MACROH2A2/PLAAT4/KEAP1
GOBP	T CELL CYTOKINE PRODUCTION	36	0.501046	1.66163	0.00545687	0.02864	0.0200055	5586	tags=61%, list=27%, signal=45%	FZD5/RSAD2/ARG1/SASH3/IL1B/IL6/LILRB4/TNFRSF1B/XCL1/DENND1B/CCR2/B2M/HLA-F/NLRP3/FOXP3/TRAF2/MALT1/TBX21/IFNA2/HLA-A/IL1R1/CLC
GOBP	INNER CELL MASS CELL PROLIFERATION	12	0.68601	1.73898	0.00543666	0.0285563	0.019947	6361	tags=92%, list=30%, signal=64%	GINS1/ZPR1/NCAPG2/COPS2/BRCA2/NDEL1/PRPF19/PELO/GINS4/TAF8/SALL4
GOBP	REGULATION OF MAST CELL ACTIVATION	41	0.492237	1.67555	0.00543608	0.0285563	0.019947	4232	tags=49%, list=20%, signal=39%	IL4R/PLA2G3/PLSCR1/LYN/HMOX1/SYK/RAC2/NR4A3/LGALS9/VAMP8/C12orf4/VAMP7/TSLP/ADGRE2/UNC13D/NECTIN2/CD300A/FGR/CRLF2/CD300LF
GOBP	UREA METABOLIC PROCESS	13	0.672251	1.74173	0.00540779	0.0284491	0.0198722	1618	tags=38%, list=8%, signal=36%	NMRAL1/ARG1/ASL/SLC25A15/NAGS
GOBP	FORELIMB MORPHOGENESIS	34	-0.502373	-1.75216	0.00535059	0.0281703	0.0196774	3223	tags=50%, list=15%, signal=42%	HOXD9/ATRX/TFAP2A/ZNF358/TBX3/SHOX2/RECK/EN1/FMN1/TWIST1/LNPK/HOXA11/ALDH1A2/TFAP2B/OSR1/ZBTB16/OSR2
GOBP	NEGATIVE REGULATION OF CELL KILLING	25	0.565769	1.70436	0.00534161	0.0281451	0.0196598	5020	tags=56%, list=24%, signal=43%	SERPINB4/KRT6A/SERPINB9/IL7R/LGALS9/HLA-E/KLRD1/HLA-F/HLA-B/LILRB1/HLA-G/PTPRC/ARRB2/HLA-A
GOBP	MULTICELLULAR ORGANISMAL SIGNALING	195	-0.282335	-1.32581	0.00531938	0.0280499	0.0195933	5098	tags=31%, list=24%, signal=23%	FGF12/ATP1B2/GRIK2/ITPR2/KCNIP2/HRC/CAMK2D/CASQ1/ITPR1/SCN1B/S1PR1/TMEM65/AVPR1A/TNNI3K/CACNA2D4/SCN3A/GPER1/NFASC/SCN9A/NOS1/NPR1/CALM2/ATP2A3/AGT/KCND2/CACNA1H/ABCC9/RYR3/KCNH2/NPR2/ATP2B1/ASPH/CACNB2/FXYD1/DSG2/ANK2/DSP/BIN1/NTRK2/SLC8A1/P2RX1/SCN7A/MYH14/ATP2B4/PLN/CACNA2D2/AKAP9/ITPR3/SCN3B/TRPC1/PAFAH1B1/ATP1A2/CASQ2/CACNA2D1/JAM3/FXYD6/CAV1/SOD1/MEF2A/KCNMB4
GOCC	COATED VESICLE	287	0.308685	1.39414	0.00531007	0.0280228	0.0195744	3861	tags=29%, list=19%, signal=24%	WNT5A/FZD5/CTSC/AP2S1/SERPINA1/LDLR/TGFA/DNAJC5/CNIH4/EPN3/RAB27A/AREG/COPB2/HBEGF/PCSK9/SCYL2/FCGR1B/MYO1E/MALL/STX6/LMAN2/BCAP31/YIF1A/YIF1B/DBNL/RAB5A/CD3D/CNIH1/HAX1/HSPA8/ACTR1A/SEC23B/AP1M2/PDCD6/IL7R/KDELR2/AP3B1/SEC24C/TMED5/CD3G/EREG/TFRC/VAMP8/ADAM10/COPE/SEC13/RGS19/HLA-E/VAMP7/VPS33B/STON2/FURIN/HSPD1/SFTPD/SREBF2/CLINT1/AP1B1/CLTA/AP1G2/WIPI1/SNX3/LDLRAP1/TYRP1/HLA-DRA/LMAN1/HIP1R/TM…
GOMF	ORGANIC ACID TRANSMEMBRANE TRANSPORTER ACTIVITY	146	0.358942	1.50566	0.00530203	0.0280024	0.0195601	5325	tags=39%, list=26%, signal=29%	SLC6A14/SLC26A9/SLC7A1/SLC7A11/SFXN1/ABCC1/SLC16A1/SLC23A2/SLC16A6/SLC16A10/SLC7A5/SLC25A13/SLC25A15/SLC5A6/SLC38A5/SLC25A10/SLC36A1/SLC25A44/SFXN2/SLC6A15/SLC3A2/CD36/CTNS/SLC16A9/SLC25A11/SLC9A3R1/SLC1A3/SLC26A4/SLC51A/SLC19A1/SLC16A3/SFXN5/SLC38A9/SLC66A1/SLC38A7/SLC6A20/SLC23A1/SLC7A7/SLC36A4/SLC6A1/SLC25A32/SLC43A2/SLC1A1/SLC1A5/SLC1A4/SLC10A3/SLC25A12/SLC6A19/SLC6A11/SLC16A14/SLC15A4/SLC6A6…
GOBP	VASCULAR ENDOTHELIAL GROWTH FACTOR SIGNALING PATHWAY	40	-0.475016	-1.7232	0.00529786	0.0280024	0.0195601	4633	tags=55%, list=22%, signal=43%	MYO1C/DAB2IP/KDR/PRKD2/PIK3CA/NRP1/VEGFC/JCAD/SMOC2/PDGFRB/PRKD1/VEGFB/PGF/SEMA6A/CD63/ADGRA2/FOXC1/PIK3CB/CCBE1/DCN/PDGFRA/SPRY2
GOBP	MECHANORECEPTOR DIFFERENTIATION	60	-0.405393	-1.57602	0.00528332	0.0279475	0.0195218	5630	tags=43%, list=27%, signal=32%	CECR2/IFT88/TPRN/DLL1/TRIP11/CTHRC1/FAT4/PJVK/IFT27/TRIOBP/BMP4/ADGRV1/HES1/JAG1/NTF4/TSKU/JAG2/SEC24B/NTRK2/MYCL/RBPJ/SDC4/WDPCP/MCOLN3/SLITRK6/SOD1
GOMF	CGMP BINDING	14	-0.649306	-1.79478	0.0052607	0.0278498	0.0194535	3219	tags=36%, list=15%, signal=30%	PDE5A/PRKG2/PRKG1/PDE2A/CNGA1
GOBP	MUSCLE ADAPTATION	99	-0.347483	-1.49806	0.00524532	0.0277903	0.0194119	3291	tags=32%, list=16%, signal=27%	CAMTA2/PDE9A/FOXO1/JARID2/AGT/RGS2/EDN1/IL6ST/PRKCA/ACTA1/FOXO3/SGCA/CAMK2G/KLF4/PPARA/FBXO32/PPARGC1A/IGFBP5/DAG1/LMCD1/ROCK2/ADRA1A/SMAD3/ATP2B4/TNNT1/MYOC/KLF15/TNNC1/GSN/GATM/MEF2A/UTRN
GOBP	REGULATION OF PROTEIN SERINE THREONINE KINASE ACTIVITY	466	0.278891	1.30822	0.00520307	0.0275882	0.0192708	3699	tags=27%, list=18%, signal=23%	SERPINB3/S100A12/CD24/CCNB1/WNT5A/NOD2/LTF/CDK1/CCNB2/CXCR4/FZD5/PBK/UBE2N/CKS2/CDKN3/PYCARD/SERTAD1/MACROH2A1/CCNE1/IRAK2/TGFA/GSTP1/EZH2/PPP2CA/CDC6/CCNA2/CCNE2/PPIA/CXCL10/FPR1/IRAK1/MLKL/RALB/SFN/ADAM17/CDC25A/EPHB2/DBF4/TRIB2/MAPKAPK3/CCNC/DUSP2/RGS14/DUSP14/IFNG/MAP3K9/CCNF/DBNL/GTPBP4/IL1B/LYN/PDCD10/CSK/CBLC/CDKN1A/ADORA2B/SHC1/PSRC1/PLK1/RASGRP1/PIH1D1/SYK/BCCIP/CKS1B/BLM/SESN2/RGS3/CCL1…
GOBP	MAST CELL ACTIVATION	60	0.433741	1.58758	0.00517235	0.0274469	0.0191721	4432	tags=43%, list=21%, signal=34%	S100A12/IL4R/PLA2G3/PLSCR1/RHOH/LYN/HMOX1/SYK/RAC2/NR4A3/LGALS9/VAMP8/PIK3CD/LCP2/C12orf4/VAMP7/TSLP/LAT2/ADGRE2/UNC13D/NECTIN2/CD300A/FGR/CRLF2/CD300LF/LAT
GOMF	HYDROLASE ACTIVITY ACTING ON CARBON NITROGEN BUT NOT PEPTIDE BONDS	113	0.372771	1.51555	0.00516197	0.0274136	0.0191488	5884	tags=44%, list=28%, signal=32%	GDA/GCH1/VNN3/HDAC1/APOBEC3B/PGLYRP4/VNN1/ATIC/MTHFD1/MTHFD2/ARG1/AMPD3/FAAH2/SIRT7/RIDA/NIT2/ADAR/PGLYRP2/NADSYN1/ASPG/ADA2/NGLY1/HDAC2/PGLYRP3/SIRT6/PIGL/DCTD/NTAQ1/OPLAH/NIT1/HDAC3/CAD/ACER3/AGA/ADAT3/ASAH2B/VNN2/HINT1/APOBEC3C/MTHFD2L/HDAC8/CD101/ACY1/APOBEC3G/ADAT2/DARS1/ADAT1/SIRT2/ARG2/MTA2
GOBP	REGULATION OF RESPONSE TO INTERFERON GAMMA	24	0.571972	1.72349	0.00515801	0.0274136	0.0191488	2915	tags=50%, list=14%, signal=43%	STAT1/PARP9/SOCS3/PTPN2/IFNGR1/PARP14/ARG1/IFNG/SOCS1/NLRC5/CDC37/IFNGR2
GOBP	CHROMATIN ASSEMBLY OR DISASSEMBLY	193	0.325942	1.41171	0.00512134	0.0272408	0.0190281	5042	tags=38%, list=24%, signal=29%	RUVBL1/H2AX/CENPN/HDAC1/MACROH2A1/KNL1/CENPW/CENPX/MCM2/ASF1B/OIP5/HJURP/CENPM/DNMT1/CENPK/CENPA/IPO4/POLE3/CENPS/HAT1/SUV39H2/SMARCD3/RRP8/NASP/NOC2L/NPM1/GRWD1/CENPH/CENPI/NAP1L4/HMGB2/H2BC9/MACROH2A2/H3C10/HELLS/NRDE2/PAF1/MBD2/CDKN2A/MIS18A/SMARCA4/SIRT6/SMARCA5/HMGA1/BEND3/SPTY2D1/DAXX/CENPL/CHAF1A/NAA60/CENPO/PARP10/DNMT3A/H2BC10/CENPU/H1-2/RESF1/CHAF1B/TLK2/H3C7/ZNFX1/H2BC12/H3C8/H4C4/H4C9…
GOBP	CHAPERONE MEDIATED PROTEIN FOLDING	58	0.444007	1.61011	0.00510327	0.0271662	0.018976	4203	tags=50%, list=20%, signal=40%	DNAJC5/HSPA5/CCT2/ERO1A/HSPA14/HSPA9/TRAP1/HSPE1/HSPA8/PDCD5/HSPH1/CSNK2A1/TOR1A/PDIA4/DNAJB1/FKBP1B/SDF2L1/DNAJC7/TOR2A/CHORDC1/UNC45A/PPIB/PTGES3/FKBP4/TOR1B/DNAJB5/SGTA/DNAJB12/SDF2
GOBP	METANEPHRIC COLLECTING DUCT DEVELOPMENT	11	-0.697528	-1.78504	0.00510094	0.0271662	0.018976	3069	tags=45%, list=15%, signal=39%	BMP4/WNT7B/DLG5/PTCH1/PKD1
GOMF	GLYCOSAMINOGLYCAN BINDING	219	-0.290078	-1.3868	0.00508962	0.0271365	0.0189553	3511	tags=28%, list=17%, signal=23%	FSTL1/NRP1/ADAMTS5/LGR6/APLP2/FGF1/APP/BMP4/CCN2/SMOC2/TENM1/GNS/CTSG/THBS2/RSPO3/THBS3/RTN4R/VEGFB/FGFBP3/SLIT2/CCN3/LXN/PGF/SOD3/FBLN7/FGF9/PCOLCE2/SERPINA5/SLIT3/LTBP4/APOE/PTPRS/FGFR2/LPL/TNXB/FN1/FGFR1/PTPRF/PTN/ECM2/PRELP/CCN5/LYVE1/VIT/RPL22/CFH/RSPO1/NDNF/TGFBR2/LAMC2/BMP7/DCN/PTCH1/PAFAH1B1/RTN4RL1/DPYSL3/GPNMB/POSTN/GREM2/TGFBR3/ANG
GOBP	MICROGLIAL CELL ACTIVATION	41	0.494181	1.68217	0.00508724	0.0271365	0.0189553	6073	tags=61%, list=29%, signal=43%	CTSC/LDLR/IFNGR1/TLR2/CST7/IFNG/IL6/ITGB2/GRN/TLR8/TNF/TREM2/TYROBP/SPHK1/PTPRC/IL33/AIF1/AGER/TLR1/C5AR1/FPR2/AZU1/C1QA/TLR7/IL13
GOCC	SARCOPLASM	76	-0.391961	-1.6128	0.00508408	0.0271365	0.0189553	5198	tags=47%, list=25%, signal=36%	THBS4/STRIT1/ITPR2/FABP3/RASD1/HRC/GSTM2/CAMK2D/S100A1/CASQ1/ITPR1/TMEM109/AKAP6/SLN/POMT1/RTN2/PLEC/NOS1/SPOCK1/ATP2A3/RYR3/MTMR12/ASPH/JPH2/SYNE2/CAMK2G/CMYA5/MEF2C/HABP4/PLN/ITPR3/FLNC/CASQ2/IRAG1/CACNA2D1/GSN
GOBP	REGULATION OF DEFENSE RESPONSE TO VIRUS BY VIRUS	29	0.545587	1.71207	0.00508143	0.0271365	0.0189553	4419	tags=48%, list=21%, signal=38%	AP2S1/LCK/AP1S3/CD247/AP1M2/HCK/ATP6V1H/SCRIB/AP1B1/B2M/DOCK2/EIF2AK2/AP2M1/CD28
GOMF	NUCLEOSIDE TRIPHOSPHATASE REGULATOR ACTIVITY	483	-0.241725	-1.26442	0.00507858	0.0271365	0.0189553	4067	tags=29%, list=19%, signal=24%	RGL1/DENND1A/RUNDC1/ARHGEF17/GRTP1/RASGRF2/RAPGEF4/ARHGEF10L/PREX2/RABGEF1/GNAQ/ALS2/SOS1/ARHGEF2/ALDH1A1/RALGDS/MADD/NRP1/EEF1D/RAP1A/IQSEC1/RABEP1/TIAM2/ASAP3/TBC1D8/BAG5/AGAP9/SRGAP3/ANKRD27/CPEB2/SOS2/DENND3/RASA4/AGAP4/ARHGEF1/STXBP5/TBC1D2B/LARS1/ARHGAP24/SMCR8/LRRK2/ARHGAP10/RASA3/RGS2/CYTH3/HACD3/NGEF/DENND5B/SYDE1/SLIT2/CHML/PLCB1/IPO5/DENND5A/BAG2/ARHGEF15/EVI5/DOCK5/DOCK4/FBXO8/TBC1D15…
GOBP	NUCLEUS ORGANIZATION	121	0.363931	1.49761	0.00505024	0.0270339	0.0188836	4021	tags=36%, list=19%, signal=30%	CCNB1/CDK1/CCNB2/PSME4/PPP2CA/ZPR1/ZMPSTE24/PLK1/PPP2R2A/NOLC1/EMG1/FAM118B/TOR1A/SRPK1/REEP4/SERBP1/VRK1/PITPNB/POLR1B/TARDBP/HMGB2/NDEL1/NSFL1C/HIPK2/NUP155/LEMD2/PML/CHMP5/CHMP1B/NDC1/NEK6/RNF8/CHMP6/ANKLE2/PPP2R1A/CNEP1R1/NUP205/TOR1B/NECTIN2/CHMP1A/EMD/CHMP2A/NUP107/NUP93
GOCC	KINESIN COMPLEX	49	0.466349	1.65934	0.00504248	0.0270138	0.0188696	2964	tags=35%, list=14%, signal=30%	KIF20A/KIF2C/KIF18B/KIF2A/KIF11/KIF14/BORCS5/KIF23/KIF15/KIF18A/KIF20B/NDE1/KIF22/NDEL1/KIFC1/KIF1B/KIF21B
GOBP	CELLULAR RESPONSE TO ABIOTIC STIMULUS	319	0.310001	1.4134	0.00502951	0.0269659	0.0188361	4951	tags=35%, list=24%, signal=27%	GPR68/IFI16/H2AX/PBK/MYD88/GOT1/AURKB/PTAFR/PCNA/RUVBL2/CASP1/BAK1/NMT1/MAPK13/HUS1/RAD51/METAP1/EIF2S1/MMP9/HSPA5/IRF1/ECT2/CDC25A/COPS9/ZMPSTE24/RAD51AP1/CASP5/LRRC8D/SLC2A1/NFKB1/RELB/IL1B/MYC/BAG3/FIGNL1/MMP1/CDKN1A/XRCC6/CNN2/BLM/ST20/XRCC5/SMPD1/METAP2/TNFRSF10A/NOC2L/HRAS/OXSR1/CARD16/KCNJ2/NPM1/CASP8/CHEK2/TNFRSF10B/FADD/BDKRB2/BNIP3/ATF4/LTBR/CAB39/MAP2K4/TRIAP1/INTS7/LIG4/TNFRSF1A/SWI5/…
GOBP	REGULATION OF CELLULAR RESPONSE TO TRANSFORMING GROWTH FACTOR BETA STIMULUS	120	-0.331471	-1.46078	0.00499053	0.0267783	0.0187051	5769	tags=46%, list=28%, signal=33%	HSP90AB1/PBLD/SMAD2/RNF111/CIDEA/FBN1/FLCN/EP300/NRROS/SMAD4/STUB1/LATS1/BAMBI/LEMD3/RASL11B/PEG10/PDPK1/HTRA1/UBC/SMURF1/LDLRAD4/SLC2A10/HTRA4/SIRT1/SPRED2/DAB2/LOX/GLG1/SNW1/CD109/SPRED1/TRIM33/LATS2/SNX25/CREBBP/DKK3/LTBP4/SMURF2/PMEPA1/PPARA/SDCBP/MYOCD/SKI/SMAD3/TGFB1I1/TGFBR2/ASPN/CDKN1C/IL17RD/SPRY1/ZNF703/SPRY2/CAV2/CAV1/TGFBR3
GOBP	EAR MORPHOGENESIS	106	-0.345465	-1.49976	0.00497631	0.0267233	0.0186667	2499	tags=25%, list=12%, signal=22%	EDN1/NOG/DVL2/FZD3/TWIST1/FGFR2/SEC24B/SOBP/ROR2/FRZB/NTN1/TSHZ1/LRIG1/MAPK1/LRIG3/WDPCP/GATA2/OSR1/RPL38/WDR19/SLITRK6/GLI2/SPRY2/OSR2/SOD1/GATA3
GOBP	SPINDLE MIDZONE ASSEMBLY	11	0.702073	1.7423	0.00497052	0.0267135	0.0186598	1004	tags=45%, list=5%, signal=43%	AURKB/PRC1/KIF4A/KIF23/RACGAP1
GOMF	ALANINE TRANSMEMBRANE TRANSPORTER ACTIVITY	10	0.721869	1.74325	0.00496653	0.0267135	0.0186598	5325	tags=90%, list=26%, signal=67%	SLC6A14/SLC38A5/SLC36A1/SLC3A2/SLC38A7/SLC36A4/SLC1A4/SLC6A6/SLC7A8
GOMF	PEPTIDASE REGULATOR ACTIVITY	216	0.32664	1.43422	0.00495265	0.0266602	0.0186226	2538	tags=21%, list=12%, signal=19%	SERPINB3/PI3/SERPINB4/PSME2/SERPINB13/PTTG1/LTF/SERPINB1/A2ML1/BIRC5/CTSC/SERPINA1/CSTB/PYCARD/PSME4/SLPI/PSME1/VCP/CASP1/CLPX/PRSS22/PI15/CSTA/CST7/PSENEN/PSMD14/GAPDH/SPOCK2/SERPINA3/UCHL5/WFDC12/SERPINB9/RPS6KA1/SERPINB8/SPINT2/BIRC3/ST20/CD27/PSMF1/ADRM1/PSME3/BEX3/CARD16/PRDX5/USP14/FURIN
GOBP	SPINDLE ASSEMBLY	110	0.370386	1.49651	0.00493986	0.0266126	0.0185894	3974	tags=35%, list=19%, signal=28%	CDC20/CCNB2/AURKB/NEK2/PRC1/KIF4A/AURKA/TPX2/SPAG5/RAB11A/KIF2A/KIF11/KIF23/RACGAP1/ZNF207/MYBL2/HAUS1/PLK1/BCCIP/RCC1/FBXO5/CHEK2/KPNB1/GPSM2/KIFC1/MAPRE1/WASHC5/DRG1/CHMP5/CHMP1B/NEK6/SAC3D1/CCDC69/HDAC3/CHMP1A/CHMP2A/WRAP73/TUBGCP2
GOBP	ODONTOGENESIS	120	-0.33197	-1.46298	0.00493148	0.0265888	0.0185727	4764	tags=34%, list=23%, signal=27%	PERP/WNT6/ATF2/HTRA1/MSX1/TGFB2/BMP2/PITX2/AQP5/EDA/ADAMTS5/FOXO1/EDAR/BMP4/TFAP2A/BCL11B/EDN1/JAG2/TWIST1/CTNNA1/ZNF22/LRP6/FOXC1/PAM/FGFR2/BMPR1A/PPARA/CD34/BMP7/ASPN/OSR1/AQP1/LAMA5/PDGFRA/GLI2/FST/LRP4/GLI3/TUFT1/OSR2/AXIN2
GOCC	LAMELLIPODIUM	192	-0.304774	-1.42906	0.00491606	0.026527	0.0185295	3835	tags=34%, list=18%, signal=28%	INPPL1/APC/ILK/CSPG4/ITGAV/PIK3CA/ALS2/RDX/STX2/PLXND1/TIAM2/PKN2/PXN/APP/PARVB/KITLG/WASF2/TESC/ABLIM1/AMOT/SWAP70/PTPRM/ANTXR1/SH3RF1/RAPGEF3/ACTC1/NEDD9/ARHGEF6/NHS/WASF3/SPATA13/PARVA/ACTA1/CTNNA1/FER/SYNE2/PLEKHH2/PODXL/ITGB1/PLEKHG5/SORBS2/PKD2/APBB2/DAG1/PTPRO/FERMT2/ACTA2/ABI2/MYLK/CDC42BPA/GDPD2/ABLIM3/TSC1/FGD4/ACTG2/MYH10/ITSN1/FGD5/ARHGAP31/DBN1/DPYSL3/MCC/ARHGEF7/PDLIM4/GSN/SRGAP2
GOBP	NEURAL PRECURSOR CELL PROLIFERATION	134	-0.330452	-1.48472	0.00490774	0.0265034	0.018513	3434	tags=28%, list=16%, signal=23%	HOOK3/PTBP2/VEGFC/CEP120/NAP1L1/SOX10/LRRK2/FZD3/EML1/ORC3/FGF13/EGF/CTNNA1/RYK/FGFR2/POU3F3/LIMS2/PTN/DOCK7/ELL3/PCM1/WNT2/SLC16A2/NUMBL/RERE/GATA2/PAFAH1B1/EPHB1/DIXDC1/ZNF423/CDON/DBN1/GLI2/GLI3/SOX5/EMX2/RORA
GOBP	POSITIVE REGULATION OF OSTEOBLAST DIFFERENTIATION	59	-0.4115	-1.60275	0.0049051	0.0265034	0.018513	4360	tags=56%, list=21%, signal=44%	ACVR2A/NELL1/SFRP2/IGF1/CTHRC1/TMEM119/CCN4/LRP5/ACVR2B/BMP2/BMP6/ATRAID/BMP4/WNT7B/GNAS/PRKD1/JAG1/DDR2/WWTR1/YAP1/LRP3/IL6ST/JUND/BMPR1A/MEF2C/SMAD5/BMPR1B/FERMT2/ZHX3/BMP7/GDPD2/CTNNBIP1/GLI3
GOBP	SMAD PROTEIN SIGNAL TRANSDUCTION	73	-0.389653	-1.57505	0.00488383	0.0264167	0.0184525	4040	tags=34%, list=19%, signal=28%	TGFB2/BMP2/BMP6/MSTN/SLC2A10/BMP4/DAB2/WWTR1/CCN3/FOS/RBPMS/BMPR1A/GDF7/ROR2/ZMIZ1/SMAD9/SKI/SMAD5/SMAD3/ATOH8/CILP/BMP7/VIM/MAGI2/INHBB
GOBP	PROTEIN PHOSPHOPANTETHEINYLATION	297	0.303827	1.37682	0.00486925	0.0263591	0.0184122	4163	tags=31%, list=20%, signal=25%	ZC3H12A/UBE2F/TGM1/ZDHHC21/RABGGTA/UBE2L6/ABHD17C/UCHL3/GALNT6/ERP44/TGM3/HCCS/ERO1A/UFD1/OTUB2/ZDHHC13/USP15/UBL4A/PSMD14/UCHL5/GALNT18/USP18/P4HB/LYPLA2/ZDHHC12/COPS5/YKT6/GOLGA7B/RBX1/CRELD2/MOCS3/TTL/GLUL/PPT2/GALNT3/ZDHHC24/GLRX2/TTLL12/STAMBP/SAE1/USP38/ATG7/PDIA4/UBE2M/ALG13/USP43/ATG3/HERC5/TPST2/LYPLA1/JMJD6/BRCC3/USP3/B3GALT6/PDIA6/USP39/USP14/QSOX1/RNF7/UBA6/MDM2/ZDHHC6/DLAT/ZDHHC16/B3…
GOBP	REGULATION OF CYTOKINESIS	85	0.402727	1.55931	0.00485843	0.0263217	0.0183862	2062	tags=24%, list=10%, signal=21%	KIF20A/AURKB/PRC1/AURKA/RAB11A/CDC6/KIF14/PLK2/CDC25B/ECT2/E2F8/KIF23/RACGAP1/PLK1/KIF20B/PLK3/PLK4/BRCA2/GIPC1/CETN2
GOBP	DEOXYRIBONUCLEOTIDE BIOSYNTHETIC PROCESS	14	0.663039	1.7518	0.00484358	0.0262624	0.0183447	1637	tags=43%, list=8%, signal=40%	RRM2/TYMS/CMPK2/DTYMK/ADK/RRM1
GOBP	CENTROSOME SEPARATION	15	0.651425	1.762	0.00483497	0.0262369	0.0183269	2583	tags=47%, list=12%, signal=41%	NEK2/AURKA/KIF11/RANBP1/NDE1/NDEL1/NSFL1C
GOBP	PATHWAY RESTRICTED SMAD PROTEIN PHOSPHORYLATION	62	-0.407999	-1.59656	0.00483104	0.0262368	0.0183268	4040	tags=35%, list=19%, signal=29%	TGFB2/BMP2/BMP6/LDLRAD4/MSTN/BMP4/DAB2/NOG/DKK1/ACVRL1/SNX25/RBPMS/GREM1/PMEPA1/BMPR1A/GDF7/SDCBP/TGFBR2/BMP7/ACVR1B/INHBB/TGFBR3
GOBP	MALE GENITALIA DEVELOPMENT	20	-0.590892	-1.79371	0.00481726	0.0261831	0.0182893	4957	tags=55%, list=24%, signal=42%	SYCP2/KLHL10/HSD17B3/BMP6/LGR4/TBX3/LHCGR/ROR2/PDGFRA/ASB1/AR
GOBP	HINDLIMB MORPHOGENESIS	33	-0.505299	-1.7542	0.00481278	0.02618	0.0182871	3223	tags=42%, list=15%, signal=36%	HOXD9/BMP4/GNAS/TBX3/FMN1/TWIST1/BMPR1A/GPC3/AFF3/TFAP2B/OSR1/PTCH1/ZBTB16/OSR2
GOBP	POSITIVE REGULATION OF INTERFERON BETA PRODUCTION	33	0.529965	1.72283	0.00479971	0.02613	0.0182523	3060	tags=36%, list=15%, signal=31%	IRF7/POLR3G/IFIH1/IRF1/TLR2/TBK1/DHX58/POLR3B/HMGB2/POLR3D/TLR8/DDX58
GOMF	CYSTEINE TYPE ENDOPEPTIDASE INHIBITOR ACTIVITY	53	0.452997	1.63091	0.00472128	0.0257239	0.0179685	2979	tags=28%, list=14%, signal=24%	SERPINB3/SERPINB13/PTTG1/LTF/BIRC5/CSTB/CSTA/CST7/SERPINB9/RPS6KA1/BIRC3/CD27/CARD16/PRDX5/TNFAIP8
GOBP	PEPTIDYL ARGININE METHYLATION	15	0.652532	1.76499	0.00470341	0.0256473	0.0179151	4579	tags=53%, list=22%, signal=42%	PRMT5/PRMT3/PRMT6/PRDM4/PRMT1/PRMT2/PRDM14/NDUFAF7
GOBP	TOLL LIKE RECEPTOR 4 SIGNALING PATHWAY	36	0.504797	1.67407	0.00468158	0.025549	0.0178464	4098	tags=42%, list=20%, signal=34%	NMI/LTF/IRAK1/S100A14/TNIP3/IFI35/LYN/MFHAS1/ITGB2/PTPN22/LY96/PELI1/PIK3AP1/LILRA2/TRIL
GOBP	PROTEIN LOCALIZATION TO CHROMOSOME TELOMERIC REGION	30	0.542045	1.71018	0.00466857	0.0254987	0.0178113	4453	tags=63%, list=21%, signal=50%	CCT5/MACROH2A1/CCT2/CCT3/GNL3/CCT7/PINX1/XRCC5/BRCA2/TCP1/DKC1/CCT6A/CCT8/TINF2/GNL3L/NABP2/ATR/WRAP53/TPP1
GOBP	VASCULAR PROCESS IN CIRCULATORY SYSTEM	239	-0.279526	-1.34717	0.0046645	0.0254972	0.0178102	3897	tags=31%, list=19%, signal=25%	BMP6/ITGA1/RAMP2/ANGPT1/GPER1/EDN3/SLC2A10/FOXC2/NOS1/SLC27A1/SCPEP1/SLC12A2/NPR1/PDE3A/SLC22A3/MFSD2A/ADCY6/ATP2A3/AGT/ABCC9/ECE1/RGS2/INSR/LEP/FGFBP3/ATP2B1/EDN1/LRP3/SLIT2/ATP8A1/SLC16A7/F2R/DOCK5/DOCK4/ADRB1/CLDN5/PER2/EGFR/SLC7A2/SLC22A5/SLC29A1/ABCC4/APOE/FOXC1/ARHGAP35/AKAP12/ARHGAP42/KLF2/SLC8A1/P2RX1/KCNMA1/ROCK2/ADRA1A/PRKG1/PDE2A/FERMT2/ACTA2/SLC16A2/ATP2B4/SLC2A13/ATP1A2/ADRA2A/ABCC3/…
GOMF	IMMUNE RECEPTOR ACTIVITY	127	0.364967	1.50874	0.00466309	0.0254972	0.0178102	5533	tags=46%, list=27%, signal=34%	CXCR2/CXCR4/IL4R/CCR7/OSMR/IL12RB2/FPR1/IFNGR1/CXCR6/FCGR1B/CSF2RA/IL12B/IL21R/CSF2RB/IL18RAP/FPR3/IL7R/CCR5/IL2RG/IL2RA/ACKR2/HLA-DOB/IL13RA1/EBI3/IFNGR2/KLRD1/IL1RL2/CCR1/HLA-DRA/CCRL2/IL12RB1/IFNAR2/CCR2/LILRB2/IL10RA/IL22RA1/LILRB1/IL15RA/CRLF2/CSF3R/C5AR2/CR1/C3AR1/CXCR1/CXCR3/HLA-DOA/FCER1G/IL10RB/HLA-DQB1/IL2RB/FLT3/C5AR1/FPR2/MPL/IL6R/CCR4/CXCR5/IL22RA2/IL1R1
GOMF	VOLTAGE GATED SODIUM CHANNEL ACTIVITY	23	-0.547869	-1.72907	0.00466211	0.0254972	0.0178102	4636	tags=35%, list=22%, signal=27%	SCN1B/SCN3A/SCN9A/CACNA1H/TPCN1/PKD2/SCN7A/SCN3B
GOBP	PURINE NUCLEOSIDE MONOPHOSPHATE METABOLIC PROCESS	43	0.487279	1.67156	0.00465134	0.0254875	0.0178034	4210	tags=44%, list=20%, signal=35%	AK2/GART/TJP2/APRT/ATIC/IMPDH1/NT5C2/HPRT1/AMPD3/ADSL/XDH/AK1/ADK/GMPS/CASK/CARD11/GMPR2/PRPS2/NT5C
GOBP	PIGMENT METABOLIC PROCESS	66	0.434976	1.61956	0.00461524	0.0253104	0.0176797	3354	tags=39%, list=16%, signal=33%	CDH3/WNT5A/HMOX2/SLC7A11/SRRD/GART/SHMT2/ALAS1/APRT/HMBS/HPRT1/HMOX1/GPR143/FECH/CTNS/GIPC1/COX10/PMEL/SLC25A39/GMPS/UROS/UGT1A8/FXN/TSPO/TYRP1/OPN3
GOBP	REGULATION OF TELOMERE MAINTENANCE VIA TELOMERE LENGTHENING	56	0.449332	1.63218	0.00461506	0.0253104	0.0176797	3078	tags=39%, list=15%, signal=34%	PRKCQ/AURKB/CCT5/NEK2/CCT2/HNRNPA2B1/CCT3/HNRNPC/CCT7/STN1/PINX1/PNKP/XRCC5/PIF1/TCP1/DKC1/FBXO4/CCT6A/NAT10/CCT8/PARP1/TINF2
GOBP	CHROMOSOME ORGANIZATION INVOLVED IN MEIOTIC CELL CYCLE	64	0.432131	1.60172	0.00460117	0.0252745	0.0176546	4365	tags=30%, list=21%, signal=24%	BUB1B/CCNE1/BUB1/RAD51/TRIP13/CCNE2/BRIP1/SMC2/SIRT7/FANCD2/SMC4/SGO2/NCAPD2/NDC1/SYCE3/RAD50/REC8/RAD51C/HORMAD1
GOBP	PYROPTOSIS	17	0.625321	1.74481	0.00458135	0.0251862	0.0175929	3544	tags=59%, list=17%, signal=49%	GZMB/CASP4/CASP1/GZMA/AIM2/GSDMC/CASP8/GSDMD/NLRC4/GSDME
GOCC	PROTON TRANSPORTING V TYPE ATPASE COMPLEX	27	0.560081	1.74036	0.00454324	0.0249971	0.0174609	3724	tags=48%, list=18%, signal=40%	ATP6V0D1/ATP6V1B2/ATP6V1G1/ATP6V0B/ATP6V1F/ATP6V1D/ATP6V1C1/ATP6V1C2/ATP6V1H/ATP6V1A/ATP6V0E1/TMEM199/ATP6V0A2
GOCC	REPLISOME	24	0.575438	1.73393	0.00451728	0.0248746	0.0173753	5394	tags=58%, list=26%, signal=43%	PCNA/RPA3/DONSON/POLD2/MCM3/POLA2/PRIM1/PLRG1/POLD4/POLD3/RPA1/POLD1/PRPF19/PRIM2
GOBP	GLUTATHIONE METABOLIC PROCESS	54	0.462778	1.67635	0.00448143	0.0246975	0.0172516	4028	tags=48%, list=19%, signal=39%	ETHE1/SLC7A11/CHAC1/CHAC2/GSTP1/GSTO1/CNDP2/GSTA4/GGCT/GPX1/GCLM/GLRX2/CTNS/PTGES2/GDAP1/GSTZ1/PARK7/MGST2/G6PD/GDAP1L1/GCLC/OPLAH/CLIC3/GSTM4/SLC1A1/GSTK1
GOBP	CARBOHYDRATE BIOSYNTHETIC PROCESS	199	0.324671	1.41285	0.00447321	0.0246724	0.0172341	4085	tags=32%, list=20%, signal=26%	ENO1/TPI1/PGAM1/PGK1/PGM2/GOT2/HAS3/FUT3/GOT1/PTAFR/PGD/SMPD3/ST6GALNAC1/PTPN2/MAEA/MPDU1/MDH2/ALDOA/SLC25A13/GAPDH/SLC2A1/NFKB1/PPP1CA/SLC25A10/TALDO1/SIRT7/IMPA2/GPI/NANS/GYS1/SESN2/PCK2/SLC25A11/PLEK/MDH1/SLC37A4/GYG1/ATF4/CHST11/P2RY1/PASK/EXT1/SDHAF3/G6PD/SLC35B4/P2RY6/B3GNT3/PGP/EXT2/PC/ST3GAL4/B3GNT8/CD244/G6PC1/ENO3/GSK3A/AVPR1B/PHKG2/PPP1R3D/PGK2/NTSR1/MTOR/NDST1/TKT
GOBP	INTERFERON ALPHA PRODUCTION	28	0.544795	1.70926	0.00447301	0.0246724	0.0172341	3140	tags=43%, list=15%, signal=36%	IRF7/STAT1/NMI/IFIH1/MMP12/TBK1/LILRA4/HSPD1/TLR8/NLRC3/DDX58/CHUK
GOBP	ALPHA AMINO ACID METABOLIC PROCESS	182	0.340231	1.46206	0.00446976	0.0246724	0.0172341	4610	tags=35%, list=22%, signal=27%	KYNU/GOT2/SLC7A11/ALDH7A1/GOT1/AHCY/CTPS1/GPT2/GART/IDO1/PSPH/AASS/IL4I1/SHMT2/MTHFD1/ARG1/ASL/HAL/HSD17B10/NOS2/RIDA/ALDH4A1/TDO2/MTRR/ADI1/NAGS/THAP4/GLUL/NIT2/GCLM/DHFR/GCAT/TST/GSTZ1/SARS1/GMPS/ATF4/PHGDH/PARK7/GCDH/KYAT3/ALDH5A1/SERINC5/PSAT1/ILVBL/GCLC/PLOD2/DLD/ASNS/GAD1/SLC7A7/MTHFR/CAD/BAAT/PIPOX/AASDHPPT/ENOPH1/SLC25A12/ALDH18A1/TYR/ODC1/PYCR1/SARDH
GOBP	EXECUTION PHASE OF APOPTOSIS	78	0.407946	1.55442	0.00446584	0.0246724	0.0172341	3321	tags=29%, list=16%, signal=25%	ZC3H12A/CASP4/CASP1/CASP7/PLSCR1/CFLAR/TOP2A/DNASE1L3/CASP5/CASP10/IL6/ENDOG/DEDD2/ST20/CASP8/BOK/KPNB1/HMGB2/FASLG/BAX/HTRA2/CASP3/CIDEB
GOBP	SPROUTING ANGIOGENESIS	120	-0.333002	-1.46753	0.004459	0.0246724	0.0172341	4235	tags=40%, list=20%, signal=32%	KDR/MIA3/HDAC9/HDAC5/RAMP2/ANGPT1/MAP2K5/FOXC2/NRP1/VEGFC/CREB3L1/FGF1/EGR3/ABL1/BMP4/ITGA5/SRPX2/JCAD/RSPO3/SEMA3E/RECK/VEGFB/CLEC14A/SLIT2/SPRED1/PGF/MMRN2/SEMA6A/PARVA/ACVRL1/ADGRA2/SYNJ2BP/PIK3CB/GREM1/KLF2/KLF4/AKT3/RHOJ/STARD13/MEOX2/FBXW7/CCBE1/GATA2/MAP3K3/AGTR1/JAK1/EFNB2/EPN2
GOMF	DOUBLE STRANDED RNA BINDING	75	0.409994	1.5487	0.00439255	0.0243274	0.0169931	4608	tags=40%, list=22%, signal=31%	OAS2/OASL/OAS1/ILF2/IFIH1/OAS3/TARBP2/DDX60/DHX58/SLC3A2/ADAR/TFRC/ELAVL1/DHX33/EIF4H/STAU2/HSPD1/TLR8/YRDC/DDX21/DUS2/DDX58/APTX/MRPL44/SIDT1/MSN/TUBB4B/EIF2AK2/DHX15/TUBA1B
GOBP	POSITIVE REGULATION OF T CELL MEDIATED IMMUNITY	48	0.463316	1.63729	0.00439255	0.0243274	0.0169931	4438	tags=56%, list=21%, signal=44%	FZD5/RSAD2/CYRIB/SASH3/IL1B/IL12B/IL6/IL23A/FADD/HLA-E/HSPD1/XCL1/CD1B/HLA-DRA/IL12RB1/B2M/HLA-F/HLA-B/NECTIN2/NLRP3/HLA-G/FOXP3/TRAF2/FBXO38/CD1D/PTPRC/MALT1
GOCC	PROTEIN DNA COMPLEX	177	0.335765	1.43848	0.00436467	0.0242129	0.0169131	5934	tags=42%, list=28%, signal=30%	GINS3/H2AX/MCM6/PCNA/MACROH2A1/H2AZ1/GINS2/TOP1/POLR2H/RPA3/MCM4/CDC45/GINS1/MCM5/MCM2/CENPA/STN1/H2AJ/DONSON/POLD2/WDR18/MCM7/XRCC6/MCM3/XRCC5/PRKDC/POLA2/NPM1/PRIM1/H2BC9/MACROH2A2/H3C10/LEF1/GTF2E1/PLRG1/POLD4/PARP1/TINF2/GTF2B/POLD3/H2AC4/H2AC13/JUP/H2BC10/SLF1/H1-2/RPA1/H3C7/POLD1/NFYC/H2BC12/H3C8/H4C4/H2AC16/H4C9/H2BC13/H1-5/PRPF19/H2BC6/H4C2/GLYR1/GINS4/H1-3/TERT/PRIM2/H4C5/H1-1/KDM1B/IRF4…
GOBP	REGULATION OF EXTRACELLULAR MATRIX ASSEMBLY	15	-0.634383	-1.78596	0.00434471	0.0241221	0.0168497	2962	tags=80%, list=14%, signal=69%	HAS2/TIE1/EMILIN1/SOX9/PHLDB2/AGT/RGCC/CLASP1/ANTXR1/PHLDB1/DAG1/SMAD3
GOMF	EXORIBONUCLEASE ACTIVITY	39	0.492503	1.65201	0.00433773	0.0241033	0.0168365	3878	tags=49%, list=19%, signal=40%	ZC3H12A/ISG20/EXOSC4/PNPT1/EXOSC3/ISG20L2/DIS3/PDE12/CNOT1/EXOSC2/ERI1/ERI2/USB1/EXOSC5/XRN2/NOCT/CNOT6/TOE1/DCPS
GOMF	CADHERIN BINDING	328	0.30237	1.37762	0.00433287	0.0240962	0.0168316	4256	tags=31%, list=20%, signal=25%	ENO1/MICALL1/STAT1/RAN/CDH3/EPHA2/CCNB2/RUVBL1/BZW1/TWF1/LRRC59/PSMB6/HSPA5/TXNDC9/DIAPH3/TJP2/S100A11/SFN/VAPA/ATIC/LDHA/S100P/RANBP1/ALDOA/TMPO/FSCN1/SNX1/LAD1/PRDX1/PPP1CA/DBNL/EXOC3/RARS1/BAG3/RAB1A/LYPLA2/CKAP5/BZW2/ANLN/YKT6/HSPA8/NOP56/CAPZA1/EPS8L2/SLC3A2/CNN2/RAB10/MYO1B/EHD4/GIPC1/DNAJB1/SERBP1/RANGAP1/PKP3/ARFIP2/SND1/TMOD3/EIF4H/UBFD1/YWHAZ/PARK7/EIF4G2/LARP1/H3C10/ABI1/SCRIB/MAPRE1/P…
GOMF	OXIDOREDUCTASE ACTIVITY ACTING ON A SULFUR GROUP OF DONORS NAD P AS ACCEPTOR	11	0.707593	1.756	0.00432078	0.0240489	0.0167985	3457	tags=64%, list=17%, signal=53%	TXNDC17/PGK1/SELENOT/TXNRD1/TXN/TXNRD3/DLD
GOMF	PEPTIDOGLYCAN BINDING	18	0.628827	1.78325	0.00431448	0.0240337	0.016788	3769	tags=44%, list=18%, signal=36%	NOD2/PGLYRP4/TLR2/RNASE7/PGLYRP2/TREM2/PGLYRP3/NLRP3
GOBP	RNA SPLICING VIA TRANSESTERIFICATION REACTIONS	342	0.296126	1.35448	0.00431033	0.0240305	0.0167857	4998	tags=35%, list=24%, signal=27%	EIF4A3/DDX39A/C1QBP/ESRP2/PPIL1/SNRPG/POLR2H/SNRPF/SNRPD1/HNRNPA2B1/NCBP1/SRSF9/POLR2F/PRMT5/HNRNPC/DDX41/LSM2/BUD31/TXNL4A/SF3B3/LSM7/SNRPD3/EFTUD2/WDR77/SNRNP25/SF3B5/LSM1/CD2BP2/SNU13/UBL5/CPSF3/PPIH/PSPC1/ALYREF/SNRPA1/GEMIN6/MAGOHB/CSTF2/SNRPC/GEMIN7/HSPA8/SF3B6/LSM5/LSM4/POLR2L/SNRPB/SRSF2/AQR/SRPK1/POLR2G/DAZAP1/LUC7L2/ELAVL1/POLR2D/PRPF31/JMJD6/PRPF38A/SRSF7/SRSF1/USP39/STRAP/HNRNPF/LSM6/…
GOBP	POSITIVE REGULATION OF TRANSCRIPTION OF NUCLEOLAR LARGE RRNA BY RNA POLYMERASE I	10	0.727906	1.75783	0.00430873	0.0240305	0.0167857	4534	tags=80%, list=22%, signal=63%	IPPK/MARS1/PIH1D1/SMARCA4/NOL11/MTOR/PWP1/NCL
GOMF	PROTEASOME BINDING	15	0.656586	1.77596	0.00430873	0.0240305	0.0167857	2523	tags=53%, list=12%, signal=47%	PSME4/ID1/PSMD14/PSMG1/UCHL5/PSMF1/ADRM1/USP14
GOMF	LIGAND ACTIVATED TRANSCRIPTION FACTOR ACTIVITY	50	-0.446817	-1.69829	0.0043065	0.0240305	0.0167857	3266	tags=46%, list=16%, signal=39%	NR1D2/NR1I3/RARA/NR2C1/NR2F1/RORB/RORC/NR2C2/ESRRG/NR1H3/NR5A2/ESR1/PPARG/PGR/NR2F2/PPARA/THRA/ARNT/NR3C1/RXRA/AR/NR3C2/RORA
GOBP	T CELL SELECTION	48	0.464361	1.64098	0.00427771	0.0239281	0.0167142	5438	tags=62%, list=26%, signal=46%	CCR7/PTPN2/STAT3/CTSL/CD3D/ATG5/IL12B/SYK/IL6/IL23A/BATF/CD3G/THEMIS/CD3E/IL12RB1/FOXN1/IL15/CARD11/ZAP70/DOCK2/MTOR/FOXP3/CD1D/PTPRC/CD28/AIRE/TBX21/SLAMF6/STK11/IL6R
GOBP	POSITIVE REGULATION OF BIOMINERALIZATION	47	-0.448201	-1.69023	0.0042776	0.0239281	0.0167142	5450	tags=60%, list=26%, signal=44%	ACVR2A/NELL1/KL/PKDCC/WNT6/TMEM119/ACVR2B/BMP2/BMP6/ATRAID/BMP4/ADGRV1/TFAP2A/ATP2B1/ANO6/FBLN7/P2RX7/GPM6B/BMPR1A/PTN/MEF2C/SLC8A1/BMPR1B/SMAD3/BMP7/OSR1/OSR2/ADRB2
GOMF	TRANSFERASE ACTIVITY TRANSFERRING ONE CARBON GROUPS	216	0.328169	1.44093	0.00426953	0.0239222	0.01671	4688	tags=35%, list=22%, signal=28%	CIAPIN1/TYMS/ECE2/EZH2/SMYD2/GART/WDR4/DIMT1/SHMT2/COMTD1/PRMT5/PRDM1/ATIC/DNMT1/NOP2/FTSJ1/NTMT1/PRMT3/METTL6/METTL1/HENMT1/ICMT/FAM98A/TRMT10C/DNMT3B/TFB2M/PRMT6/SUV39H2/EMG1/PRDM4/COQ3/NSD2/NSUN2/RRP8/CMTR2/TRMT6/TRMT112/TPMT/SETD4/METTL8/LCMT1/SPOUT1/CARNMT1/ANTKMT/PRDM2/CSKMT/DOT1L/MTFMT/MEN1/MECOM/ARMT1/PRMT1/MRM2/TRMT1/LCMT2/METTL4/EED/MRM3/THUMPD3/TYW3/DNMT3A/FDXACB1/CAD/METTL22/BUD23/NSD…
GOBP	NEGATIVE REGULATION OF LEUKOCYTE CELL CELL ADHESION	120	0.372747	1.53111	0.0042671	0.0239222	0.01671	3986	tags=33%, list=19%, signal=27%	ZC3H12A/CD274/IL4R/TNFRSF21/IDO1/PTPN2/IRF1/PLA2G2F/ARG1/CEBPB/JAK3/SOCS1/CBFB/TIGIT/ZC3H8/GLMN/LGALS9/PTPN22/LAG3/IL2RA/LILRB4/LAPTM5/CD86/CRTAM/TMEM131L/SCRIB/SFTPD/XCL1/CLEC4G/ANXA1/PELI1/CASP3/LILRB2/PAG1/LILRB1/HLA-G/CD300A/CD80/IL10/FOXP3
GOMF	3 5 EXONUCLEASE ACTIVITY	55	0.452209	1.6401	0.00426449	0.0239222	0.01671	5259	tags=49%, list=25%, signal=37%	TREX2/ISG20/EXOSC4/PNPT1/EXOSC3/ISG20L2/APEX2/DIS3/PDE12/CNOT1/EXOSC2/ERI1/ERI2/USB1/EXOSC5/XRN2/NOCT/CNOT6/TOE1/REXO4/RAD50/POLD1/ANGEL1/REXO2/POLG/APEX1/APLF
GOCC	MYELIN SHEATH	39	-0.456469	-1.6451	0.00425784	0.0239165	0.0167061	1324	tags=38%, list=6%, signal=36%	GDI1/MBP/PMP2/MPZ/PTEN/DLG1/PLP1/TSPAN2/ITPR3/CA13/JAM3/GSN/BCL2/TUBA1A/PLLP
GOBP	SOMITOGENESIS	63	-0.402996	-1.57421	0.0042419	0.0238469	0.0166575	5538	tags=46%, list=27%, signal=34%	SFRP1/POFUT1/MED12/SFRP2/DLL1/EP300/PCDH8/SMAD4/SEMA3C/ATM/KAT2A/XRCC2/FOXC2/MIB1/MEOX1/NKD1/DMRT2/LRP6/FOXC1/BMPR1A/ROR2/ALDH1A2/SMAD3/RBPJ/MEOX2/LFNG/PLXNA2/AXIN2/COBL
GOBP	OUTFLOW TRACT SEPTUM MORPHOGENESIS	25	-0.548013	-1.76951	0.00422097	0.0237491	0.0165892	5056	tags=48%, list=24%, signal=36%	SMAD4/TBX1/SEMA3C/TGFB2/NRP1/BMP4/ROBO2/PARVA/FGFR2/BMPR1A/TGFBR2/ZFPM2
GOBP	POSITIVE T CELL SELECTION	36	0.507489	1.683	0.00420448	0.0236762	0.0165382	5931	tags=67%, list=28%, signal=48%	PTPN2/STAT3/CTSL/CD3D/IL12B/IL6/IL23A/BATF/CD3G/THEMIS/CD3E/IL12RB1/FOXN1/ZAP70/DOCK2/MTOR/FOXP3/PTPRC/TBX21/SLAMF6/STK11/IL6R/IRF4/TNFSF18
GOBP	TERMINATION OF RNA POLYMERASE II TRANSCRIPTION	35	0.511402	1.6936	0.00420448	0.0236762	0.0165382	5659	tags=63%, list=27%, signal=46%	SNRPG/SNRPF/NCBP1/SNRPD3/CPSF3/LSM10/CSTF2/SNRPB/CLP1/TTF2/CPSF4/SSU72/CSTF1/WDR33/CSTF3/PAPOLA/SLBP/SYMPK/SNRPE/NCBP2/MED18/ZNF473
GOBP	PYRIMIDINE NUCLEOSIDE TRIPHOSPHATE BIOSYNTHETIC PROCESS	17	0.627494	1.75087	0.00419691	0.0236732	0.0165361	615	tags=35%, list=3%, signal=34%	UCK2/NME1/CTPS1/TYMS/CMPK2/DTYMK
GOMF	EXONUCLEASE ACTIVITY ACTIVE WITH EITHER RIBO OR DEOXYRIBONUCLEIC ACIDS AND PRODUCING 5 PHOSPHOMONOESTERS	57	0.456723	1.65784	0.0041954	0.0236732	0.0165361	4366	tags=44%, list=21%, signal=35%	TREX2/ISG20/EXOSC4/FEN1/PNPT1/EXOSC3/EXO1/ISG20L2/APEX2/DIS3/PDE12/CNOT1/EXOSC2/ERI1/ERI2/USB1/EXOSC5/APTX/XRN2/NOCT/CNOT6/TOE1/PLD4/POLD1/ANGEL1
GOBP	HISTONE ARGININE METHYLATION	11	0.709264	1.76015	0.00419084	0.0236732	0.0165361	4346	tags=55%, list=21%, signal=43%	PRMT5/PRMT6/PRDM4/PRMT1/PRMT2/PRDM14
GOMF	TRANSLATION FACTOR ACTIVITY RNA BINDING	78	0.408719	1.55737	0.0041814	0.0236453	0.0165166	4350	tags=45%, list=21%, signal=36%	GSPT1/EIF2B2/TSFM/EIF4E2/MCTS1/EIF2S2/EIF4E/EIF6/EIF3J/EIF2S1/EIF3I/MRPL58/COPS5/DENR/EIF3K/GTPBP2/TUFM/MTIF2/EIF3B/EIF2B1/EIF4H/EIF4G2/EIF2B4/ABCF1/EIF4G1/EIF5/EIF2B5/EIF5A/EIF2B3/DHX29/MTRF1L/EIF3A/CPEB4/EFL1/EIF3M
GOBP	PLASMINOGEN ACTIVATION	21	0.601811	1.75394	0.00414718	0.0234716	0.0163953	1669	tags=29%, list=8%, signal=26%	ENO1/PGK1/PLGRKT/F12/PLAT/PLAU
GOBP	REGULATION OF NEUROGENESIS	332	-0.26383	-1.32339	0.00414401	0.0234716	0.0163953	4588	tags=32%, list=22%, signal=26%	CUX2/NUMB/SHTN1/LRP1/HEY1/SEMA3A/CERS2/RND2/CTNNB1/TRPC6/OBSL1/RUFY3/SORL1/SERPINF1/BMP2/EGR2/XRCC2/AMIGO1/RNF112/GPER1/SS18L1/SEMA6D/PTEN/NRP1/HOOK3/PLXND1/VEGFC/EFNB3/RELN/TIAM2/ANKRD27/ROBO2/HES1/CXCL12/NAP1L1/RTN4R/SOX10/SPEN/ZNF365/SHOX2/SEMA3E/GOLGA4/NPTN/YAP1/MACF1/L1CAM/PRUNE1/SLIT2/SNW1/NOG/IL6ST/SOX8/BHLHB9/FZD3/SPART/SEMA4G/MAP6/ARNTL/SEMA6A/DUSP10/FGF13/PPARG/CTNNA1/SEMA3B/PER2/PLAG1/…
GOBP	RESPONSE TO STEROID HORMONE	320	-0.262676	-1.3147	0.00414401	0.0234716	0.0163953	4666	tags=34%, list=22%, signal=27%	CALCOCO1/ABCA2/TRIM68/KCTD6/MAOB/MGARP/HEY1/HDAC6/NCOA1/CRY1/MED1/NCOA4/RBBP7/AVPR1A/CPS1/TGFB2/SERPINF1/BMP6/RAMP2/PCK1/GPER1/MSTN/PADI2/NCOA2/TFPI/HSD11B2/UBE3A/HSD3B1/NR2C1/DSG1/NCOR1/FOXO1/SIRT1/HNMT/GPAM/BMP4/KMT2D/CCN2/DAB2/PTPRU/SMYD3/LOX/SCGB2A2/UFSP2/FAM107A/SOX10/YAP1/ESRRG/NR1H3/ATP2B1/EDN1/GNRH1/SLIT2/ADIPOQ/LMO3/DUSP1/SCGB2A1/ACSBG1/FOS/UFM1/ARNTL/ESR1/PLPP1/ACTA1/EGFR/BCHE/CDO1/PGR/…
GOBP	NEGATIVE REGULATION OF PROTEIN CONTAINING COMPLEX DISASSEMBLY	79	-0.374895	-1.54893	0.00413383	0.0234553	0.0163839	3828	tags=39%, list=18%, signal=32%	APC/TRIOBP/DMTN/CAMSAP2/PIK3CA/ARHGEF2/RDX/SCAF4/SWAP70/ATXN7/CLASP1/ADD1/TMOD2/FGF13/PLEKHH2/BMERB1/VILL/SPTAN1/CAMSAP3/TTBK2/SCIN/SVIL/SCAF8/EPS8/SPTBN2/ADD3/LMOD1/TMOD1/GSN/SPTBN1/MAP1B
GOBP	PROGRAMMED NECROTIC CELL DEATH	43	0.48933	1.67859	0.00412478	0.0234237	0.0163619	3206	tags=42%, list=15%, signal=36%	PPIF/PYGL/CASP1/CFLAR/MLKL/PGAM5/BIRC3/RIPK3/CASP8/FADD/BOK/ALKBH7/LY96/TNF/MAP3K5/FASLG/BAX/PELI1
GOBP	TRNA 5 LEADER REMOVAL	12	0.698073	1.76956	0.0041187	0.023409	0.0163516	4057	tags=67%, list=19%, signal=54%	RPP40/POP5/RPP25L/POP4/POP1/POP7/RPP30/RPP38
GOMF	HYDROLASE ACTIVITY ACTING ON CARBON NITROGEN BUT NOT PEPTIDE BONDS IN CYCLIC AMIDINES	33	0.532692	1.73169	0.00411847	0.023409	0.0163516	5663	tags=48%, list=27%, signal=35%	GDA/GCH1/APOBEC3B/ATIC/MTHFD1/MTHFD2/AMPD3/ADAR/ADA2/DCTD/ADAT3/APOBEC3C/MTHFD2L/APOBEC3G/ADAT2/ADAT1
GOBP	RNA CATABOLIC PROCESS	401	0.296522	1.37301	0.00410199	0.0233536	0.0163128	3629	tags=29%, list=17%, signal=25%	ZC3H12A/PSME2/CARHSP1/GSPT1/PSMB2/EIF4A3/PSMA5/PSMB5/OAS2/PSMA3/MYD88/PSMD12/PSME4/PSMA2/ISG20/PSME1/SLIRP/PSMB6/EXOSC4/PSMB10/PSMB3/PSMD6/PSMB8/PPP2CA/PSMC4/RNASEH2A/PSMA4/ZPR1/PSMD2/NCBP1/FEN1/HNRNPC/PNPT1/HELZ2/LSM2/FASTKD2/MRTO4/PSMD11/PSMD1/LSM7/FASTKD5/PYM1/PSMD14/PSMC3/PSMB9/EXOSC3/LSM1/FASTKD1/CNOT11/RIDA/PSMA7/DIS3/PSMD9/PSMD8/MAGOHB/TBRG4/HSPA8/PDE12/PPP2R2A/PSMA1/DNA2/LSM5/EXOSC1/ZC3H1…
GOBP	CELL CELL RECOGNITION	74	0.420582	1.58564	0.0040991	0.0233536	0.0163128	5578	tags=36%, list=27%, signal=27%	FUT3/CCT5/CCR7/CCT2/CCT3/CCT7/ALDOA/TEX101/PRF1/VDAC2/CD6/CCL19/DOCK8/TCP1/CATSPERB/CCT8/SPA17/DOCK2/MSN/CATSPER1/NCK2/CLEC4M/PAEP/CD209/UBAP2L/ADAM20/ADAM30
GOMF	GROWTH FACTOR BINDING	136	-0.329563	-1.48824	0.00404559	0.0230716	0.0161159	4621	tags=40%, list=22%, signal=32%	PDGFB/COL6A1/HTRA1/FGFRL1/LRRC32/TEK/CRIM1/KDR/CCN4/ACVR2B/LTBP2/NRDC/ITGAV/NRP1/FGFR3/ACVR1C/ERBB3/CEP57/KLB/HTRA4/SRPX2/CCN2/PDGFRB/GLG1/S100A13/GPC1/INSR/FGFBP3/IL6ST/CCN3/CD109/DUSP1/IGF1R/TSKU/A2M/PDGFA/EGFR/FGFBP2/ACVRL1/KAZALD1/LTBP4/FGFR2/IL11RA/NTRK2/GHR/FGFR1/PTN/IGFBP5/IGFBP6/CCN5/TGFBR2/ACVR1B/LIFR/PDGFRA/TGFBR3
GOBP	NEGATIVE REGULATION OF CANONICAL WNT SIGNALING PATHWAY	171	0.33918	1.44972	0.00401993	0.0229447	0.0160272	2454	tags=28%, list=12%, signal=25%	PSME2/PSMB2/WNT5A/PSMA5/PSMB5/PSMA3/PSMD12/CSNK1A1/PSME4/PSMA2/PSME1/HDAC1/PSMB6/RUVBL2/PSMB10/PSMB3/PSMD6/PSMB8/PSMC4/PSMA4/FERMT1/PSMD2/SCYL2/PSMD11/PSMD1/PSMD14/PSMC3/PSMB9/SOST/PSMA7/PSMD9/PSMD8/RBX1/PSMA1/PSMD13/PSMF1/PSMC5/PSMC2/MAD2L2/TLE3/PSMB1/PSMC6/SLC9A3R1/PSME3/PSMD7/PSMC1/SIAH2/TMEM64
GOCC	PHAGOCYTIC VESICLE	134	0.367874	1.52786	0.00401747	0.0229447	0.0160272	4044	tags=33%, list=19%, signal=27%	TRIM14/RAB38/NOD2/LTF/ATP6V0D1/RAB11A/ATP6V0B/TAP1/TLR2/TAP2/STX6/CLCN3/RAB31/GNLY/RAB5A/ATG5/CORO1A/SYK/RAC2/CD36/RAB10/VAMP8/NCF2/ADAM8/CTSS/HLA-E/VAMP7/TAPBP/CYBA/ATP6V0E1/SNX3/STX4/RAB8A/B2M/HLA-F/BECN1/WAS/HLA-B/ATP6V0A2/MPEG1/HLA-G/MTOR/PLD4/ZDHHC5
GOBP	DIGESTIVE SYSTEM DEVELOPMENT	127	-0.335296	-1.49551	0.00400706	0.0229102	0.0160031	5374	tags=40%, list=26%, signal=30%	AGR2/SFRP2/HOXA5/EDNRB/SPDEF/EPHB3/PKDCC/CHD8/FAT4/WNT11/CYP1A1/PCSK5/YIPF6/BBS7/CPS1/TGFB2/RARRES2/SAV1/SFRP5/LGR4/IFT172/CCKBR/BMP4/HES1/AHI1/SOX10/SHOX2/YAP1/IL6ST/DACT1/EGFR/FGFR2/NPHP3/CLMP/MYOCD/ALDH1A2/RBPMS2/SMAD3/TGFBR2/WDPCP/CBFA2T2/DCHS1/PKD1/WDR19/PDGFRA/GLI2/GLI3/KIT/BCL2/PDGFC/COBL
GOBP	POSITIVE REGULATION OF TELOMERE MAINTENANCE	48	0.465283	1.64424	0.00399062	0.0228356	0.015951	4174	tags=48%, list=20%, signal=38%	PRKCQ/AURKB/CCT5/NEK2/CCT2/HNRNPA2B1/CCT3/GNL3/CCT7/PNKP/XRCC5/TCP1/DKC1/FBXO4/CCT6A/PML/CCT8/ERCC1/SIRT6/NABP2/RAD50/ATR/MAPKAPK5
GOBP	GLYCOSYL COMPOUND CATABOLIC PROCESS	40	0.493779	1.66654	0.0039807	0.0227983	0.015925	2659	tags=30%, list=13%, signal=26%	TYMP/UPP1/PNP/NT5C3A/AHCY/APOBEC3B/HPRT1/GBA2/XDH/NAGA/GLA/ADA2
GOBP	CAMERA TYPE EYE MORPHOGENESIS	114	-0.336339	-1.47658	0.00394856	0.0226335	0.0158099	3946	tags=33%, list=19%, signal=27%	OBSL1/LRP5/PITX2/AQP5/NECTIN3/IFT172/COL8A1/MFSD2A/BMP4/RORB/TFAP2A/JAG1/AHI1/PTPRM/DIO3/SOX8/TSKU/SP3/TWIST1/LRP6/NTRK2/COL8A2/PTN/RBP4/ZHX2/SKI/WNT2/ABI2/IFT122/BMP7/TFAP2B/CDON/NOTCH2/GLI3/C12orf57/MEIS1/BCAR3/WNT2B
GOBP	POSITIVE REGULATION OF GLUCOSE IMPORT	36	-0.48114	-1.69498	0.00394165	0.0226131	0.0157956	2533	tags=33%, list=12%, signal=29%	INSR/ADIPOQ/RHOQ/GPC3/OSBPL8/KLF15/IRS1/PIK3R1/CREBL2/SORBS1/IRS2/MEF2A
GOBP	FEMALE SEX DIFFERENTIATION	110	-0.34286	-1.49896	0.00392471	0.0225352	0.0157412	3121	tags=30%, list=15%, signal=26%	SIRT1/ROBO2/KITLG/MERTK/TBX3/DACH1/LEP/GNRH1/SLIT2/LHCGR/ESR1/CTNNA1/PGR/SLIT3/FOXC1/ZFX/RBP4/BMPR1B/ZFPM2/FZD4/IMMP2L/STAT5B/PLEKHA1/ACVR1B/NUPR1/AXL/PDGFRA/INHBB/FST/KIT/BCL2/SOD1/ANG
GOBP	REGULATION OF HEART RATE	91	-0.365039	-1.5556	0.00391433	0.0224948	0.015713	4886	tags=33%, list=23%, signal=25%	HRC/CAMK2D/SCN1B/SEMA3A/AVPR1A/TNNI3K/EDN3/TAC1/CALM2/BVES/KCNH2/EDN1/CACNB2/ADRB1/DSG2/ANK2/DSP/BIN1/POPDC2/SLC8A1/ADRA1A/PLN/AKAP9/SCN3B/CASQ2/GPD1L/CACNA2D1/DMD/TPM1/CAV1
GOCC	VACUOLAR LUMEN	165	0.342746	1.46157	0.00391071	0.0224933	0.0157119	4254	tags=35%, list=20%, signal=28%	SERPINB3/HPSE/GM2A/FABP5/SERPINB13/CTSC/S100A7/PYCARD/GGH/VCP/CTSB/IFI30/PRSS2/CCT2/IMPDH1/CTSL/PLAC8/ARG1/PSMD1/TOLLIP/SERPINA3/LIPA/HSPA8/NSG1/NAPRT/LYZ/PA2G4/PPT2/PTGES2/CTSD/SMPD1/GRN/CTSA/GYG1/CPPED1/CTSS/GLA/ADA2/ARSA/ARHGAP45/FASLG/STK11IP/CCT8/PRDX6/PRKCD/LGMN/FRK/MNDA/UNC13D/TRAPPC1/CAP1/AGA/MAN2B1/NEU1/TUBB4B/CREG1/GALNS
GOCC	CAVEOLA	80	-0.374603	-1.55768	0.00390623	0.0224868	0.0157074	3097	tags=36%, list=15%, signal=31%	PACSIN2/EHD2/BVES/LRRK2/EFNA5/CAVIN3/INSR/SPRED1/F2R/NEU3/PLPP1/FXYD1/CTNNA1/LRP6/BMPR1A/KCNMA1/ADRA1A/MAPK1/ATP2B4/TGFBR2/CAVIN2/PTCH1/ATP1A2/IRS1/PTGIS/CAVIN1/DLC1/CAV2/CAV1
GOBP	SULFUR COMPOUND TRANSPORT	48	0.466376	1.6481	0.00387579	0.0223306	0.0155983	4983	tags=44%, list=24%, signal=33%	SLC26A9/SLC7A11/ABCC1/RACGAP1/SLC5A6/LRRC8D/SLC25A10/SLC36A1/CTNS/SLC25A11/SLC9A3R1/SLC26A4/SLC25A19/SLC38A7/GJA1/SLC1A1/SLC1A4/SLC13A4/ABCC5/SLC19A3/SLC6A6
GOBP	TUBE FORMATION	139	-0.32393	-1.46207	0.00385883	0.022252	0.0155434	5366	tags=45%, list=26%, signal=34%	CECR2/FGF2/SFRP1/MED12/SFRP2/HESX1/CEP290/TSC2/TEAD2/IRX3/OPA1/CTHRC1/SEMA4C/WNT6/RPS7/DAB2IP/DVL1/PRKACB/DVL3/KAT2A/TGFB2/EDA/MIB1/IFT172/IFT52/SETD2/PRICKLE1/TCTN1/ABL1/EDAR/BMP4/IRX2/BCAS3/LMO4/SOX4/STK3/NOG/DVL2/SOX8/FZD3/TWIST1/EGF/TULP3/LRP6/ARHGAP35/PODXL/FGFR2/GREM1/SEC24B/GDF7/NPHP3/SKI/ATOH8/IFT122/SDC4/BMP7/OSR1/PTCH1/TSC1/IRX1/DLC1/COBL/GATA3
GOCC	MITOCHONDRIAL RESPIRATORY CHAIN COMPLEX IV	12	0.703243	1.78266	0.00385511	0.0222497	0.0155418	3812	tags=67%, list=18%, signal=55%	UQCRFS1/COX5A/C15orf48/NDUFA4/COX6A1/UQCRC2/COX7C/COX4I1
GOBP	REGULATION OF TUMOR NECROSIS FACTOR MEDIATED SIGNALING PATHWAY	57	0.457749	1.66156	0.0038482	0.0222289	0.0155272	4189	tags=44%, list=20%, signal=35%	CASP4/PYCARD/CASP1/GSTP1/PTPN2/SPPL2A/ADAM17/BIRC3/SYK/TRAF1/IKBKG/PYDC1/CARD16/CASP8/LAPTM5/TNFRSF1A/TNF/CHUK/TRADD/CPNE1/SPHK1/OTULIN/TRAF2/NLRP2B/RBCK1
GOBP	PROTEIN LOCALIZATION TO CELL PERIPHERY	323	-0.270489	-1.35814	0.00380672	0.0220082	0.0153731	4823	tags=35%, list=23%, signal=27%	GOLPH3L/CPLX1/PKDCC/RILPL2/FLOT1/PDPK1/ABCA2/NUMB/LRP1/PDZK1/STAC2/ZDHHC8/ARHGAP44/TMBIM1/ACSL3/ZDHHC7/BBIP1/PTPN9/GPHN/MRAP/EFR3A/TNIK/APPL1/SMURF1/SEC16A/ZDHHC3/RAMP2/GRIP1/GPER1/SQSTM1/NFASC/VAMP2/RDX/C2CD5/PRKCE/NECTIN3/RAP1A/LIN7A/RABEP1/KRT18/ZDHHC2/GGA3/DLG1/PREPL/LGI1/EFCAB7/DAB2/EHD2/TESC/PACS2/GOPC/GOLGA4/S100A10/PRKG2/MACF1/ADIPOQ/RAB26/CLSTN1/RAB40B/TSPAN14/CACNB2/RHOQ/FGF13/GGA2/EGFR…
GOBP	INTRACILIARY TRANSPORT	52	-0.436476	-1.66313	0.00379526	0.0219608	0.01534	5964	tags=67%, list=29%, signal=48%	TTC21A/TNPO1/TTC30B/LCA5L/KIF3C/IFT88/RPGR/IFT81/TRIP11/IFT140/KIF3A/BBS12/KIF17/IFT74/DYNC2LI1/IFT27/TTC30A/IFT172/IFT52/LCA5/TTC21B/DYNC2H1/DYNC2I1/TRAF3IP1/DYNLL2/IFT22/TUB/CLUAP1/ARL3/DYNLRB2/PCM1/IFT122/WDR35/WDR19/DYNLRB1
GOBP	RESPONSE TO INTERLEUKIN 4	34	0.519798	1.7064	0.00377098	0.0218392	0.015255	4232	tags=59%, list=20%, signal=47%	IL4R/HSPA5/MCM2/PTPN2/PARP14/ARG1/JAK3/CORO1A/IL24/IL2RG/SHPK/KEAP1/LEF1/PML/XCL1/NFIL3/RPLP0/CDK4/XBP1/CD300LF
GOBP	POSITIVE REGULATION OF MITOCHONDRIAL TRANSLATION	16	0.658246	1.82275	0.00376795	0.0218392	0.015255	4523	tags=75%, list=22%, signal=59%	C1QBP/FASTKD2/TRUB2/TRMT10C/COA3/UQCC2/MPV17L2/MRPS27/RCC1L/FASTKD3/UQCC1/RPUSD3
GOBP	CELLULAR RESPONSE TO CHEMICAL STRESS	329	0.306213	1.39546	0.00376177	0.0218234	0.015244	3348	tags=28%, list=16%, signal=24%	GJB2/ZC3H12A/CYCS/MELK/PPIF/SLC7A11/GCH1/GPX2/PCNA/SRXN1/GSTP1/VRK2/HIF1A/EZH2/MAPK13/NCOA7/CCNA2/EIF2S1/MMP9/SMPD3/PPARGC1B/CFLAR/VNN1/PPIA/ERO1A/ATP2A2/ADPRS/TXNRD1/ECT2/PNPT1/ARG1/MEAK7/PRDX1/TRAP1/LRRC8D/CHCHD2/SLC2A1/RELB/ATG5/P4HB/PDCD10/ROMO1/DNMT3B/HMOX1/XRCC6/FANCD2/GPX1/PDE8A/SOD2/IL18RAP/NR4A3/IL6/ENDOG/RIPK3/SESN2/CD36/XRCC5/GLRX2/GSKIP/ATG7/DHFR/OXSR1/NCF2/BDKRB2/BNIP3/ATF4/CAB39/TXN…
GOBP	REGULATION OF ANION TRANSMEMBRANE TRANSPORT	104	-0.351818	-1.53208	0.00370203	0.0214955	0.0150149	3499	tags=34%, list=17%, signal=28%	SLC43A1/C2CD5/RAP1A/ACSL1/C3/TCAF1/CLTRN/ENPP1/GOPC/RGS2/INSR/LEP/EDN1/ADIPOQ/RHOQ/PRKAG2/PER2/CLIP3/ITGB1/SLC25A27/GPC3/OSBPL8/PRKCB/BRAF/PID1/KLF15/ARL6IP5/ATP1A2/IRS1/PIK3R1/AZIN1/CREBL2/SORBS1/IRS2/MEF2A
GOMF	MISFOLDED PROTEIN BINDING	27	0.566506	1.76033	0.00366594	0.0213043	0.0148814	2468	tags=37%, list=12%, signal=33%	F12/HSPA5/DNAJB11/HSPA14/HSPA9/HSPA8/EDEM1/TOR1A/DERL2/SDF2L1
GOBP	EPITHELIAL CELL DEVELOPMENT	204	-0.295953	-1.39353	0.00366401	0.0213043	0.0148814	3952	tags=47%, list=19%, signal=39%	FRS2/LRTOMT/RARB/HOXA13/NKX3-2/RHEB/EZR/SHROOM3/NOTCH4/INSM1/FLNA/SOX18/HEG1/COL18A1/PDE4D/TPRN/DLL1/HOXA5/S1PR3/SPDEF/FOXA1/CDH5/RILPL2/PDPK1/FASN/CDK6/PDGFB/PLOD3/POF1B/DACT2/YIPF6/ADAMTSL4/BMP6/IFT74/RAP1B/TRIOBP/GSTM3/ARID4A/FOXC2/RDX/WNT5B/RAP1A/VCL/CLIC4/FEM1B/BMP4/WNT7B/TFCP2L1/ATRX/CLDN3/JAG1/BCL11B/ASXL1/PECAM1/YAP1/IL6ST/ADIPOQ/PLCB1/SOX8/ARNTL/RAPGEF3/ADD1/MET/ESR1/RFX3/ROBO4/CLDN5/KRT…
GOBP	REGULATION OF T CELL MIGRATION	42	0.505526	1.72556	0.00366251	0.0213043	0.0148814	3616	tags=45%, list=17%, signal=37%	C10orf99/WNT5A/CCL20/S100A7/PYCARD/CXCL13/CXCL10/ADAM17/ITGA4/RIPK3/DOCK8/OXSR1/ADAM10/ADAM8/FADD/CCL5/XCL1/CCR2/TMEM102
GOMF	STRUCTURAL CONSTITUENT OF MUSCLE	42	-0.478361	-1.75096	0.00366042	0.0213043	0.0148814	4245	tags=43%, list=20%, signal=34%	MYOM1/PLEC/CAPN3/KRT19/MYOM2/MYL9/MYOT/ASPH/NEXN/SORBS2/DAG1/SYNM/TPM2/CSRP1/NEBL/DMD/MYH11/TPM1
GOBP	TRANSCRIPTION ELONGATION FROM RNA POLYMERASE II PROMOTER	84	0.40888	1.57952	0.00364784	0.0212727	0.0148593	4252	tags=39%, list=20%, signal=31%	POLR2H/EZH2/ELL2/NCBP1/POLR2F/ELOC/ELOB/NELFCD/POLR2L/ELOF1/LEO1/RNF168/ADRM1/POLR2G/POLR2D/ELL/EAF1/CDK7/IWS1/PAF1/POLR2E/CCNH/RNF8/NELFE/CDK9/CTR9/POLR2I/SSRP1/SUPT4H1/ENY2/CCNK/TCERG1/POLR2J
GOBP	GLYCOLYTIC PROCESS THROUGH FRUCTOSE 6 PHOSPHATE	29	0.555964	1.74463	0.00364743	0.0212727	0.0148593	3165	tags=45%, list=15%, signal=38%	ENO1/TPI1/PGAM1/PGK1/HK2/ALDOA/FOXK2/GAPDH/GPI/GALK1/PFKP/PKM/ADPGK
GOBP	RAS PROTEIN SIGNAL TRANSDUCTION	331	-0.261686	-1.31347	0.00364727	0.0212727	0.0148593	3722	tags=28%, list=18%, signal=23%	PLD1/SQSTM1/LPAR4/ALS2/SOS1/ARHGEF2/RALGDS/MADD/RDX/NRP1/PPP2CB/RAP1A/IQSEC1/GNA12/GNA13/RIPOR1/RABL3/RAB30/ABL1/DENND3/RASA4/SHC3/PDGFRB/KITLG/SHOC2/WASF2/PRKD1/ARHGEF1/GNB1/ARHGAP24/RAB33B/RTN4R/RASA3/KSR1/CYTH3/NET1/ERBIN/HACD3/BRAP/MRAS/F2R/ZNF304/FBXO8/AUTS2/RAPGEF3/MET/GARRE1/SHC2/RRAS/APOE/OGT/ARHGAP35/ITPKB/PIK3CB/RERG/ARHGAP42/PLEKHG5/RHOB/STMN3/SCAI/NISCH/NTN1/RHOJ/CTNNAL1/STARD13/AKAP1…
GOBP	LOOP OF HENLE DEVELOPMENT	11	-0.713672	-1.82635	0.00364693	0.0212727	0.0148593	3051	tags=82%, list=15%, signal=70%	DLL1/IRX3/WNT7B/IRX2/JAG1/POU3F3/PKD2/PKD1/IRX1
GOBP	REGULATION OF HEMOPOIESIS	390	0.290192	1.34247	0.00364242	0.0212727	0.0148593	4929	tags=36%, list=24%, signal=28%	ZC3H12A/NFKBIZ/IRF7/STAT1/PNP/LTF/GPR68/PRELID1/IL4R/NME1/PRKCQ/HDAC1/HMGB3/PLA2G3/ISG15/CD83/HIF1A/EIF6/PPARGC1B/VNN1/IL20/PTPN2/IRF1/PRDM1/HSPA9/STAT3/CD2/SASH3/NCAPG2/CEBPB/RHOH/AP3D1/JAK3/IFNG/SMAP1/MYC/LYN/SOCS1/HAX1/CBFB/SLAMF8/IL12B/XRCC6/FANCD2/ZC3H8/SYK/RCOR1/IKZF3/IL7R/NR4A3/PRMT6/LGALS9/CCL19/CD27/AP3B1/CIB1/IL23A/LEO1/PITHD1/ZFP36/LAG3/PRKDC/DPY30/IL2RA/PGLYRP2/GPR137B/CASP8/ADAM8/FAD…
GOCC	CATALYTIC STEP 2 SPLICEOSOME	85	0.408973	1.58349	0.0036369	0.0212727	0.0148593	3696	tags=35%, list=18%, signal=29%	EIF4A3/PPIL1/SNRPG/SNRPF/SNRPD1/HNRNPA2B1/HNRNPC/DDX41/LSM2/BUD31/SF3B3/LSM7/SNRPD3/EFTUD2/ALYREF/SNRPA1/MAGOHB/SF3B6/SNRPB/AQR/SRSF1/HNRNPF/HNRNPM/ISY1/PLRG1/PRPF4B/PNN/MAGOH/SNRNP40/TFIP11
GOBP	PROTEIN COMPLEX OLIGOMERIZATION	223	0.331852	1.46294	0.0036209	0.0212262	0.0148268	4230	tags=28%, list=20%, signal=23%	ZC3H12A/TK1/PYCARD/HOMER1/KCTD5/ALDH1A3/TNFAIP1/STOML2/SHMT2/GBP5/MLKL/ECT2/PNPT1/HPRT1/ALDOA/CPSF6/PRF1/FARSA/MIF/HSD17B10/OSBPL2/TDO2/KCTD11/SOD2/KCTD1/RRM1/BLM/STEAP4/EHD4/FARSB/POLQ/KCNJ2/ELAVL1/JMJD6/GSDMD/TWNK/ACOT13/BOK/TP63/KCTD21/PDCD6IP/ACACA/KCTD4/KCNS3/KCND3/PRMT1/SIGMAR1/RNF213/BEND3/NLRC4/SHKBP1/B2M/ARC/SAMHD1/ROM1/ALOX5AP/HLA-G/KCNC3/CHMP2A/THG1L/SLC1A5/VASP/KCNG1
GOBP	MITOTIC SPINDLE ASSEMBLY	63	0.439508	1.6283	0.00361388	0.0212036	0.014811	2985	tags=35%, list=14%, signal=30%	CDC20/AURKB/NEK2/PRC1/KIF4A/TPX2/RAB11A/KIF2A/KIF11/KIF23/RACGAP1/ZNF207/MYBL2/PLK1/BCCIP/RCC1/CHEK2/KPNB1/KIFC1/DRG1/CHMP5/CHMP1B
GOBP	MITOTIC G1 S TRANSITION CHECKPOINT	62	0.446993	1.6472	0.00360144	0.021149	0.0147729	3325	tags=40%, list=16%, signal=34%	CCNB1/CDK1/TFDP1/PCNA/AURKA/PLK2/SFN/E2F8/CNOT11/CDKN1A/PLK3/CNOT1/PRKDC/CHEK2/TRIAP1/CDK2/CRADD/CDC25C/PML/BAX/GADD45A/PRMT1/MDM2/RFWD3/CNOT6
GOBP	LOCOMOTORY BEHAVIOR	156	-0.313114	-1.4332	0.00359165	0.02111	0.0147456	3817	tags=28%, list=18%, signal=23%	HEXB/PREX2/NCOA2/PRKN/PTEN/PRKCE/EFNB3/HOXD9/NCOR1/APP/CXCL12/KCND2/LRRK2/CIART/SNCG/NTF4/LGI4/EN1/PPP1R1B/PPP3CB/APOE/GLRB/MECP2/OXR1/SOBP/NEGR1/NPY1R/DDHD2/FZD4/PAFAH1B1/TSC1/ATP1A2/MCOLN3/APH1B/NOVA1/ZFHX3/PUM1/HPGDS/SLITRK6/SLC18A2/ANKH/TMOD1/MEIS1/SOD1
GOBP	MONOCYTE CHEMOTAXIS	58	0.453879	1.6459	0.00358689	0.0211005	0.014739	3579	tags=41%, list=17%, signal=34%	S100A12/CCL20/S100A7/CXCL10/CCL18/CCL4/CCL22/S100A14/CCL2/LYN/SLAMF8/DEFB124/CCL8/IL6/CCL7/CCL19/CXCL17/CCL5/XCL1/CCR1/ANXA1/CCR2/CCL17/LGMN
GOBP	POSITIVE REGULATION OF INFLAMMATORY RESPONSE	119	0.384162	1.57153	0.00358493	0.0211005	0.014739	2901	tags=29%, list=14%, signal=25%	S100A12/S100A9/NFKBIZ/NMI/WNT5A/S100A8/CTSC/ABCC1/CCR7/PLA2G3/OSMR/MAPK13/IDO1/TLR2/IFI35/CEBPB/IFNG/IL1B/IL12B/IL6/IL23A/GRN/FFAR2/VAMP8/ADAM8/TNIP1/HLA-E/VAMP7/PTGER3/TSLP/PARK7/TNFRSF1A/MGST2/TNF/TREM2
GOBP	RESPONSE TO ENDOPLASMIC RETICULUM STRESS	287	0.314544	1.42061	0.00354643	0.0208991	0.0145983	4964	tags=36%, list=24%, signal=27%	MANF/CHAC1/CASP4/NRBF2/VCP/ATP6V0D1/ERP44/BAK1/TMEM117/EIF2S1/HSPA5/FBXO6/HM13/SERP1/ERO1A/ATP2A2/PTPN2/CXCL8/DNAJB11/UFD1/AIFM1/SEC61B/CEBPB/BCAP31/YIF1A/CCL2/FOXRED2/P4HB/COPS5/TMCO1/SRPRB/UBXN8/HDGF/SHC1/TMX1/HYOU1/EDEM1/SESN2/PREB/TOR1A/DERL2/PDIA4/PSMC6/AUP1/LPCAT3/DDRGK1/TNFRSF10B/PDIA6/ATF4/BOK/SDF2L1/TARDBP/USP14/PARK7/PIK3R2/EDEM2/GET3/UBE2J2/CANX/EDEM3/MAP3K5/PML/BAX/PPP1R15B/WIPI1/EIF4…
GOBP	RNA PHOSPHODIESTER BOND HYDROLYSIS EXONUCLEOLYTIC	43	0.494597	1.69666	0.00353972	0.0208778	0.0145835	3878	tags=49%, list=19%, signal=40%	ZC3H12A/ISG20/EXOSC4/PNPT1/EXOSC3/ISG20L2/DIS3/PDE12/EXOSC1/CNOT1/EXOSC2/ERI1/ERI2/USB1/EXOSC5/XRN2/NOCT/CNOT6/EXOSC8/TOE1/DCPS
GOCC	OUTER MEMBRANE	216	0.330734	1.45219	0.00353762	0.0208778	0.0145835	4460	tags=37%, list=21%, signal=29%	TRIM14/IFI27/HK2/NLRX1/NME1/TIGAR/BCL2A1/MFN1/GK/ATP5MC3/TOMM22/BAK1/PHB/RSAD2/STMP1/ABCB6/TOMM5/MTX2/HSPA9/MARCHF5/TOMM40L/MICOS10/ARG1/SLC25A46/CYP27B1/VDAC2/TOMM40/CNP/PGAM5/COASY/BID/MICOS13/HAX1/CYP24A1/MTX1/CHCHD3/IMMT/RTN4IP1/GDAP1/CASP8/VDAC1/BNIP3/BOK/TOMM34/AGPAT5/CISD1/MFF/VDAC3/CPTP/BAX/CPT1C/MIEF1/TSPO/SIGMAR1/AGK/FUNDC2/MYO19/ITPRIP/PHB2/APOO/STARD7/DNAJC11/NUTF2/MCL1/TRAF3IP3/GJA1/…
GOBP	REGULATION OF ANTIGEN PROCESSING AND PRESENTATION	20	0.613366	1.77275	0.00352567	0.0208315	0.0145512	3632	tags=50%, list=17%, signal=41%	NOD2/PYCARD/CCR7/CCL19/HLA-DOB/TAPBPL/TREM2/LILRB2/CD68/WAS
GOBP	REGULATION OF SMOOTH MUSCLE CELL DIFFERENTIATION	30	-0.519828	-1.76188	0.00351944	0.020813	0.0145382	3985	tags=53%, list=19%, signal=43%	ANKRD17/GPER1/EFEMP2/SIRT1/BMP4/FGF9/NFATC2/FGFR2/MECP2/MYOCD/RBPMS2/PDCD4/NFATC1/PRDM6/PIAS1/KIT
GOBP	MACROAUTOPHAGY	301	0.309246	1.4044	0.00351237	0.0207895	0.0145218	3946	tags=32%, list=19%, signal=26%	NOD2/TIGAR/MFN1/VCP/ATP6V0D1/TOMM22/SPTLC2/HIF1A/ATP6V1B2/ATP6V1G1/ATP6V0B/VPS25/RALB/TOMM5/GAPDH/LAMTOR5/LAMTOR2/ATG2A/TOMM40/SNAP29/EPG5/RAB5A/ATG13/BAG3/RAB1A/PGAM5/ATG5/CDK5/SNX6/EMC6/HMOX1/STAM/CAPN1/VTA1/TBK1/CSNK2A1/ATP6V1D/DYNLL1/SESN2/PHF23/ATP6V1C1/POLDIP2/ATP6V1C2/GNAI3/PIP4K2C/ATG7/ATG4B/PLAA/NPC1/ATG3/IKBKG/AUP1/VAMP8/VDAC1/VPS37A/ATP6V1H/ATP6V1A/DDRGK1/BNIP3/SNF8/QSOX1/SNAPIN/RRAGC/…
GOBP	SNRNA METABOLIC PROCESS	37	0.517195	1.72149	0.00350011	0.0207352	0.0144839	3570	tags=41%, list=17%, signal=34%	EXOSC4/NHP2/NOP10/EXOSC3/EXOSC2/USB1/INTS7/DKC1/EXOSC5/INTS5/METTL4/INTS9/INTS14/EXOSC8/TOE1
GOBP	POSITIVE REGULATION OF HEMOPOIESIS	149	0.362242	1.52871	0.0034786	0.020626	0.0144076	4704	tags=42%, list=23%, signal=33%	NFKBIZ/PNP/GPR68/IL4R/PLA2G3/CD83/PPARGC1B/VNN1/IL20/SASH3/RHOH/AP3D1/IFNG/SOCS1/HAX1/CBFB/IL12B/XRCC6/SYK/IL7R/LGALS9/CCL19/CD27/AP3B1/IL23A/PRKDC/IL2RA/CASP8/ADAM8/FADD/LILRB4/TMEM64/TNFSF9/CD86/HCLS1/TNF/LEF1/IL36B/NFKBID/TREM2/RB1/IL1RL2/CCR1/ANXA1/HLA-DRA/IL12RB1/TYROBP/LILRB2/IL15/ZAP70/NLRP3/HLA-G/CD80/IL10/FOXP3/XBP1/CR1/PTPRC/MALT1/TRIB1/NKAP/AGER/PPP2R3C
GOBP	KILLING OF CELLS IN OTHER ORGANISM INVOLVED IN SYMBIOTIC INTERACTION	22	0.584965	1.73163	0.00345622	0.0205114	0.0143275	2324	tags=36%, list=11%, signal=32%	KRT6A/APOL1/TUSC2/ARG1/GAPDH/ROMO1/CXCL6/CAMP
GOBP	REGULATION OF CELLULAR RESPIRATION	22	0.585246	1.73246	0.00345622	0.0205114	0.0143275	3354	tags=55%, list=16%, signal=46%	PRELID1/VCP/HIF1A/SHMT2/PNPT1/IFNG/TRAP1/NOS2/BNIP3/CISD1/IDE/OPN3
GOBP	NECROPTOTIC PROCESS	35	0.517276	1.71305	0.0034292	0.0203871	0.0142407	3206	tags=40%, list=15%, signal=34%	PPIF/PYGL/CFLAR/MLKL/PGAM5/BIRC3/RIPK3/CASP8/FADD/BOK/LY96/TNF/FASLG/PELI1
GOMF	3 5 DNA HELICASE ACTIVITY	17	0.635081	1.77204	0.00342802	0.0203871	0.0142407	1757	tags=35%, list=8%, signal=32%	ASCC3/MCM6/MCM5/MCM2/MCM7/BLM
GOBP	POSITIVE REGULATION OF CHROMOSOME SEPARATION	17	0.635775	1.77398	0.00342802	0.0203871	0.0142407	3150	tags=53%, list=15%, signal=45%	DLGAP5/PLSCR1/ANAPC7/CDT1/ESPL1/MAD2L1BP/ANAPC11/RB1/CDC23
GOBP	REGULATION OF CELLULAR AMIDE METABOLIC PROCESS	397	0.29152	1.3499	0.00339022	0.020209	0.0141163	3964	tags=31%, list=19%, signal=25%	ZC3H12A/GSPT1/PGAM1/NOD2/EIF4A3/EIF4EBP1/GZMB/SLC7A11/C1QBP/EIF2B2/TSFM/TIGAR/EIF4E2/MRPL13/PTAFR/EIF4E/TYMS/ORMDL2/EIF6/KRT17/METAP1/EIF2S1/SMPD3/SHMT2/SELENOT/NCBP1/BCL3/IFNGR1/TACO1/STAT3/CDC123/RPS6KB2/TARBP2/FASTKD2/TRUB2/PYM1/IFNG/GAPDH/TRAP1/ABCG1/PPP1CA/DPH2/PUM3/CNOT11/MTG1/RIDA/TRMT10C/COA3/KBTBD8/EIF3K/RPS6KA1/UQCC2/NOLC1/PA2G4/IL6/ZC3H12D/SESN2/SHFL/SARNP/MTIF2/CNOT1/MPV17L2/DHFR/ZFP3…
GOBP	COLLAGEN FIBRIL ORGANIZATION	51	-0.443357	-1.68506	0.0033861	0.0202023	0.0141116	6090	tags=53%, list=29%, signal=38%	FMOD/ADAMTS3/P3H4/COL5A1/SFRP2/COL1A2/COL5A3/LOXL1/LOXL3/NF1/ATP7A/PLOD3/TGFB2/EFEMP2/FOXC2/CYP1B1/LOX/AEBP1/DDR2/CHADL/COL12A1/DPT/FOXC1/GREM1/TNXB/CRTAP/LOXL4
GOBP	REGULATION OF T HELPER 17 TYPE IMMUNE RESPONSE	21	0.609138	1.77529	0.00337563	0.0201578	0.0140805	4814	tags=52%, list=23%, signal=40%	ZC3H12A/NFKBIZ/PRKCQ/IL12B/IL23A/NFKBID/IL12RB1/FOXP3/NLRP10/MALT1/TBX21
GOBP	AORTIC VALVE MORPHOGENESIS	31	-0.52394	-1.78308	0.00334425	0.0199882	0.0139621	3784	tags=35%, list=18%, signal=29%	ELN/BMP4/ROBO2/JAG1/SLIT2/EFNA1/TWIST1/SLIT3/ROCK2/NFATC1/GATA3
GOBP	RETROGRADE VESICLE MEDIATED TRANSPORT GOLGI TO ENDOPLASMIC RETICULUM	82	0.413144	1.58833	0.00333879	0.0199733	0.0139517	4662	tags=43%, list=22%, signal=33%	RER1/KIF2C/KIF4A/KIF2A/KIF11/COPB2/CENPE/KIF23/RACGAP1/LMAN2/RAB1A/KIF15/KIF18A/KDELR2/NSF/ARF3/SURF4/NAPA/COPE/PITPNB/KIF22/TAPBP/COG4/RAB6A/TMED7/HTT/ARF5/SCFD1/TMED9/KIFAP3/RINT1/BNIP1/ARF4/DNAJC28/STX18
GOBP	NEGATIVE REGULATION OF LEUKOCYTE PROLIFERATION	83	0.416698	1.60554	0.00333879	0.0199733	0.0139517	4262	tags=41%, list=20%, signal=33%	CD274/TNFRSF21/GSTP1/IDO1/PLA2G2F/ARG1/CEBPB/LYN/CCL8/GLMN/LGALS9/IL2RA/LILRB4/CD86/CRTAM/TMEM131L/SCRIB/SFTPD/XCL1/CLEC4G/PELI1/CASP3/TYROBP/TNFRSF13B/LILRB2/MNDA/LILRB1/HLA-G/CD300A/CD80/IL10/FOXP3/LST1/CR1
GOBP	NEGATIVE REGULATION OF INTERLEUKIN 1 PRODUCTION	32	0.518318	1.67325	0.00332449	0.0199232	0.0139167	3970	tags=41%, list=19%, signal=33%	ZC3H12A/SERPINB1/GSTP1/CARD16/LILRB4/TREM2/PML/CPTP/NLRP7/CARD18/ERRFI1/NLRP3/IL10
GOBP	METANEPHRIC GLOMERULUS DEVELOPMENT	15	-0.644063	-1.81321	0.00329496	0.0197639	0.0138054	3438	tags=53%, list=16%, signal=45%	PDGFB/LGR4/PDGFRB/ADIPOQ/LAMB2/CD34/OSR1/PDGFRA
GOBP	ELASTIC FIBER ASSEMBLY	10	-0.725757	-1.81769	0.00325299	0.0195296	0.0136417	4774	tags=70%, list=23%, signal=54%	ATP7A/EFEMP2/LOX/MFAP4/TNXB/FBLN5/MYH11
GOBP	PROTEIN AUTOPROCESSING	24	0.588921	1.77456	0.00323581	0.0194438	0.0135818	5027	tags=54%, list=24%, signal=41%	KLK6/CASP4/F12/CASP1/PCSK9/CTSL/FXN/PARP1/HTRA2/MYRF/SPRTN/AFG3L2/PIDD1
GOBP	SKELETAL MUSCLE ORGAN DEVELOPMENT	152	-0.318712	-1.45361	0.00321397	0.0193299	0.0135022	4329	tags=36%, list=21%, signal=29%	CCNT2/DLL1/EP300/ATF3/RBM24/TBX1/FLOT1/CASQ1/HDAC4/NR1D2/MYOM1/VGLL2/DNER/HDAC9/EGR2/ELN/MSTN/HOXD9/MYMX/KCNAB1/ZBTB18/MYOM2/BVES/SHOX2/GPC1/HLF/SOX8/FOS/ARNTL/BCL9/TWIST1/ACTA1/LARGE1/DDX17/POPDC2/NR2F2/MEF2C/MYOCD/MEF2D/NLN/DAG1/SKI/SVIL/MEOX2/MYH14/CFL2/DCN/EPHB1/FXR1/CYP26B1/NUPR1/CDON/CAV2/BCL2/CAV1
GOBP	POSITIVE REGULATION OF CYTOKINE PRODUCTION INVOLVED IN INFLAMMATORY RESPONSE	20	0.616232	1.78104	0.00320805	0.0193116	0.0134894	4090	tags=55%, list=20%, signal=44%	NOD2/CLEC7A/MYD88/PLA2G3/GBP5/STAT3/CD6/IL6/TNF/IL17F/GPSM3
GOBP	MALE SEX DIFFERENTIATION	150	-0.331787	-1.51207	0.00317384	0.0191228	0.0133575	2992	tags=25%, list=14%, signal=22%	PDGFRB/KITLG/ATRX/CSDE1/TESC/TBX3/SPATA2/MGST1/LHCGR/SOX8/WDR48/ESR1/FGF9/CTNNA1/KDM5A/AKR1C3/BMPR1A/ROR2/HOXA11/SMAD5/STAR/ZFPM2/HOXA10/STAT5B/PLEKHA1/NUPR1/AGO4/PDGFRA/ASB1/RNF38/AR/PATZ1/KIT/BCL2/RHOBTB3/WNT2B/CCND1/GATA3
GOBP	POSITIVE REGULATION OF MITOCHONDRION ORGANIZATION	83	0.417116	1.60715	0.00317046	0.0191195	0.0133553	3775	tags=42%, list=18%, signal=35%	TFDP1/PPIF/GZMB/FAM162A/PYCARD/BAK1/HIF1A/NMT1/BIK/YWHAQ/MMP9/TNFSF10/SFN/MARCHF5/BID/PDCD5/PLAUR/CASP8/VDAC1/BNIP3/BOK/TP63/YWHAZ/PARK7/TREM2/MFF/BAX/HTRA2/MIEF1/ZDHHC6/HIP1R/CIDEB/HTT/MAPK8/GSK3A
GOCC	SPLICEOSOMAL COMPLEX	181	0.344554	1.47938	0.00315905	0.0190678	0.0133192	4985	tags=40%, list=24%, signal=31%	EIF4A3/PPIL1/SNRPG/SNRPF/SNRPD1/HNRNPA2B1/HNRNPC/DDX41/LSM2/BUD31/TXNL4A/SF3B3/LSM7/SNRPD3/EFTUD2/SNRNP25/SF3B5/SNU13/PPIH/ALYREF/SNRPA1/MAGOHB/SNRPC/HSPA8/SF3B6/LSM5/LSM4/SNRPB/AQR/ADAR/LUC7L2/PRPF31/PRPF38A/SRSF1/USP39/HNRNPF/LSM6/RBM28/HNRNPM/ISY1/PRPF4/PLRG1/TTF2/YBX1/PRPF4B/GEMIN2/SNRPA/PNN/MAGOH/SNRNP40/DHX32/TFIP11/DQX1/UPF1/TRA2B/PRPF38B/CWF19L1/SMNDC1/TXNL4B/PRPF18/CWC25/DHX15/HNRNPK/NCL…
GOBP	AXON EXTENSION	111	-0.348223	-1.51914	0.00315643	0.0190678	0.0133192	4893	tags=41%, list=23%, signal=31%	GDI1/SEMA4C/SEMA3C/MAPT/SHTN1/LRP1/USP9X/SEMA3A/DVL1/RUFY3/SEMA6D/NRP1/VCL/ABL1/SIN3A/CXCL12/RTN4R/SEMA3E/GOLGA4/MACF1/L1CAM/SLIT2/SEMA4G/AUTS2/SEMA6A/SEMA3B/PPP3CB/NDN/RYK/SLIT3/APOE/PTPRS/DCLK1/ULK2/LAMB2/FN1/GSK3B/MAP2/NTN1/RTN4/DPYSL2/SEMA3G/DBN1/ALCAM/MAP1B
GOBP	PURINE NUCLEOSIDE MONOPHOSPHATE BIOSYNTHETIC PROCESS	23	0.593883	1.76266	0.00311367	0.0188278	0.0131515	2322	tags=39%, list=11%, signal=35%	GART/APRT/ATIC/IMPDH1/HPRT1/AMPD3/ADSL/ADK/GMPS
GOCC	TELOMERASE HOLOENZYME COMPLEX	21	0.610831	1.78022	0.00308709	0.0186838	0.013051	5343	tags=67%, list=26%, signal=50%	NHP2/NOP10/HNRNPC/SNRPD3/SNRPB/GAR1/DKC1/NAT10/GNL3L/PTGES3/WRAP53/SMG5/TERT/SNRPE
GOBP	REGULATION OF IMMUNOGLOBULIN PRODUCTION	66	0.444662	1.65562	0.00308629	0.0186838	0.013051	6335	tags=59%, list=30%, signal=41%	IL4R/SASH3/EXOSC3/CGAS/GPI/IL6/NSD2/MAD2L2/PRKDC/TFRC/HMCES/HLA-E/TNF/XCL1/STX4/TNFRSF4/MZB1/IL10/FOXP3/XBP1/PARP3/TRAF2/CR1/TNFSF13/PTPRC/CD28/IL33/CD40/TBX21/SLC15A4/MLH1/KMT5C/CLCF1/TP53BP1/PAXIP1/IL13/CD40LG/IL5/TLR9
GOBP	PURINE NUCLEOBASE METABOLIC PROCESS	18	0.642076	1.82082	0.00305542	0.0185256	0.0129404	4568	tags=61%, list=22%, signal=48%	GDA/ACP3/GART/SHMT2/APRT/HPRT1/XDH/GMPS/KDM1A/GMPR2/PAICS
GOCC	RNA POLYMERASE III COMPLEX	18	0.642425	1.82182	0.00305542	0.0185256	0.0129404	2784	tags=50%, list=13%, signal=43%	POLR3G/POLR2H/POLR2F/POLR3K/POLR3B/POLR2L/POLR1C/POLR3D/POLR2E
GOBP	REGULATION OF ANATOMICAL STRUCTURE SIZE	477	-0.250024	-1.3018	0.00304849	0.018517	0.0129344	3784	tags=27%, list=18%, signal=23%	ELN/GPER1/TRIOBP/DMTN/EDN3/PIK3CA/ALS2/SEMA6D/PTEN/FOXC2/RDX/NRP1/NOS1/SCPEP1/PRKCE/SLC12A2/HP1BP3/NPR1/PEX11A/DLG1/WASHC1/ABL1/SIN3A/ADCY6/DEPTOR/TENM1/AGT/WASF2/TMSB4X/CXCL12/LARS1/ECE1/ASXL1/RTN4R/LRRK2/RGS2/SEMA3E/GOLGA4/SWAP70/LEP/ATP2B1/EDN1/MACF1/L1CAM/SLIT2/ANO6/F2R/SPART/SEMA4G/DOCK5/DOCK4/SLC12A7/RAB22A/KANK4/ADD1/SEMA6A/ADRB1/FMN1/TMOD2/RB1CC1/WASF3/FGF13/SEMA3B/CLCN6/PER2/EGFR/FER/P2R…
GOMF	TRANSLATION INITIATION FACTOR ACTIVITY	47	0.479875	1.67761	0.00304759	0.018517	0.0129344	4031	tags=51%, list=19%, signal=41%	EIF2B2/EIF4E2/MCTS1/EIF2S2/EIF4E/EIF6/EIF3J/EIF2S1/EIF3I/COPS5/DENR/EIF3K/MTIF2/EIF3B/EIF2B1/EIF4H/EIF4G2/EIF2B4/EIF4G1/EIF5/EIF2B5/EIF2B3/DHX29/EIF3A
GOBP	AROMATIC AMINO ACID FAMILY METABOLIC PROCESS	32	0.520691	1.68091	0.00304533	0.018517	0.0129344	2894	tags=28%, list=14%, signal=24%	KYNU/IDO1/IL4I1/TDO2/HPDL/THAP4/GSTZ1/PARK7/GCDH
GOBP	REGULATION OF LYMPHOCYTE CHEMOTAXIS	22	0.591521	1.75103	0.0030448	0.018517	0.0129344	3616	tags=64%, list=17%, signal=53%	WNT5A/S100A7/CXCL13/CXCL10/CCL4/ADAM17/CCL2/CCL7/OXSR1/ADAM10/CCL5/XCL1/CCR2/TMEM102
GOCC	APICAL JUNCTION COMPLEX	131	-0.331008	-1.48237	0.00304102	0.018517	0.0129344	5848	tags=49%, list=28%, signal=35%	ESAM/ANK3/CLDN16/SHROOM3/YBX3/FRMD4B/CLDN4/RHOA/IGSF5/LIN7C/NPHP1/STRN/ARHGAP17/CDH5/ASH1L/UBN1/SYNPO/POF1B/SHROOM4/CLDN15/MAGI3/APC/ARHGEF2/NECTIN3/LIN7A/CGN/PKN2/NPHP4/MXRA8/MPDZ/DLG1/CLDN3/JAM2/BVES/CLDN11/CYTH3/AMOT/AMOTL2/TJAP1/PARD6G/USP53/NHS/CLDN5/CTNNA1/EPCAM/AMOTL1/CLMP/LIN7B/CAMSAP3/FRMD4A/EPPK1/RAPGEF2/PARD3B/PARD3/MAGI1/MAGI2/CLDN8/EPB41L4B/JAM3/CGNL1/SORBS1/CLDN23/CCND1/CLDN1
GOBP	ACTIVATION OF TRANSMEMBRANE RECEPTOR PROTEIN TYROSINE KINASE ACTIVITY	12	-0.699082	-1.85228	0.00303621	0.018517	0.0129344	3778	tags=67%, list=18%, signal=55%	ANGPT1/NRG3/EFNA5/EGF/GREM1/PRLR/ADRB2/PDGFC
GOBP	MYD88 INDEPENDENT TOLL LIKE RECEPTOR SIGNALING PATHWAY	33	0.542661	1.7641	0.00303514	0.018517	0.0129344	4807	tags=55%, list=23%, signal=42%	IRF7/UBE2D3/TNIP3/IKBKE/UBE2D1/TBK1/BIRC3/TRAF3/IKBKG/CASP8/FADD/UBE2D2/LY96/CHUK/CD300LF/TANK/CD40/TICAM1
GOBP	REGULATION OF CD4 POSITIVE ALPHA BETA T CELL ACTIVATION	59	0.446942	1.63254	0.0030052	0.0183703	0.0128319	3986	tags=41%, list=19%, signal=33%	ZC3H12A/CD274/NFKBIZ/IL4R/PRKCQ/CD83/SASH3/JAK3/IFNG/SOCS1/CBFB/IL12B/LGALS9/CCL19/IL23A/CD86/NFKBID/XCL1/ANXA1/HLA-DRA/IL12RB1/NLRP3/CD80/FOXP3
GOCC	OLIGOSACCHARYLTRANSFERASE COMPLEX	13	0.693732	1.79738	0.00298413	0.0182581	0.0127536	4675	tags=77%, list=22%, signal=60%	OSTC/TUSC3/OST4/RPN1/DDOST/TMEM258/RPN2/STT3B/DAD1/MAGT1
GOBP	POSITIVE REGULATION OF RELEASE OF CYTOCHROME C FROM MITOCHONDRIA	27	0.574428	1.78494	0.00297756	0.0182345	0.0127371	3321	tags=52%, list=16%, signal=44%	PPIF/FAM162A/PYCARD/BAK1/BIK/MMP9/TNFSF10/BID/PDCD5/PLAUR/BNIP3/MFF/BAX/CIDEB
GOBP	RESPONSE TO PEPTIDOGLYCAN	12	0.710242	1.80041	0.00296727	0.0181881	0.0127047	3310	tags=58%, list=16%, signal=49%	NOD2/MYD88/DEFB124/IL6/CARD9/TREM2/IRAK3
GOBP	NUCLEOSOME ASSEMBLY	118	0.386927	1.58016	0.00294232	0.0180516	0.0126093	5270	tags=43%, list=25%, signal=32%	RUVBL1/H2AX/CENPN/MACROH2A1/KNL1/CENPW/CENPX/MCM2/ASF1B/OIP5/HJURP/CENPM/CENPK/CENPA/IPO4/CENPS/HAT1/NASP/NPM1/GRWD1/CENPH/CENPI/NAP1L4/HMGB2/H2BC9/MACROH2A2/H3C10/MIS18A/SMARCA5/SPTY2D1/DAXX/CENPL/CHAF1A/NAA60/CENPO/H2BC10/CENPU/H1-2/CHAF1B/H3C7/H2BC12/H3C8/H4C4/H4C9/H2BC13/H1-5/RBBP4/H2BC6/H4C2/CENPQ/H1-3
GOBP	TRANSITION METAL ION HOMEOSTASIS	130	0.37145	1.53792	0.00292951	0.0179894	0.0125659	2252	tags=22%, list=11%, signal=20%	LCN2/S100A9/LTF/S100A8/ATOX1/HMOX2/GLRX3/SCO2/SLC39A6/ATP6V0D1/HIF1A/ATP6V1G1/LCK/SLC25A28/ABCB6/AP3D1/NUBP1/IFNG/SCO1/MYC/HMOX1/SLC31A1/STEAP4/SLC39A4/COMMD1/AP3B1/TFRC/CUL1/ATP6V1A
GOMF	DYSTROGLYCAN BINDING	10	-0.732078	-1.83352	0.0029172	0.0179302	0.0125246	3420	tags=70%, list=16%, signal=59%	AGR2/VCL/CLASP1/AGR3/MAP2/DAG1/DMD
GOBP	ENDOTHELIAL CELL MIGRATION	213	-0.299237	-1.41822	0.00291543	0.0179302	0.0125246	4056	tags=38%, list=19%, signal=31%	HDAC9/HDAC5/SERPINF1/PRKD2/ANGPT1/PIK3CA/SCARB1/MAP2K5/TNFSF12/PTEN/FOXC2/FSTL1/NRP1/CYP1B1/PLXND1/VEGFC/FGF1/EGR3/PXN/SIRT1/ABL1/BMP4/SRPX2/JCAD/SMOC2/AGT/PRKD1/RGCC/BCAS3/TMSB4X/AMOT/PTPRM/STAT5A/EDN1/CLEC14A/SLIT2/CCN3/SPRED1/PRKCA/SVBP/MMRN2/MET/EFNA1/PPARG/EGF/SASH1/RRAS/ACVRL1/ADGRA2/SYNJ2BP/APOE/PTK2/PIK3CB/GREM1/MECP2/PLEKHG5/RHOB/KLF4/NR2F2/FGFR1/PTN/MEF2C/AKT3/RHOJ/STARD13/ROCK2/DNAJA4/…
GOBP	CENTRAL NERVOUS SYSTEM PROJECTION NEURON AXONOGENESIS	26	-0.555895	-1.81205	0.00291533	0.0179302	0.0125246	2440	tags=42%, list=12%, signal=37%	SLIT2/EPHB6/TSKU/DCLK1/ADARB1/NFIB/PAFAH1B1/EPHB1/NIN/GLI2/C12orf57
GOMF	HMG BOX DOMAIN BINDING	14	-0.67228	-1.85829	0.00291057	0.0179302	0.0125246	3891	tags=71%, list=19%, signal=58%	HOXA3/EGR2/PRRX1/MEOX1/HOXC4/PAX3/TCF12/POU3F3/SP1/GATA3
GOBP	MODULATION OF PROCESS OF OTHER ORGANISM INVOLVED IN SYMBIOTIC INTERACTION	92	0.414555	1.62324	0.00288989	0.0178276	0.0124529	3477	tags=36%, list=17%, signal=30%	ZC3H12A/KPNA2/IFI27/LTF/HDAC1/TYMS/PHB/VAPA/CCL4/PSMC3/ATG5/HSPA8/SERPINB9/CCL8/ATG7/CASP8/TNIP1/SUGT1/TARDBP/KPNB1/HIPK2/SCRIB/SFTPD/CCL5/LEF1/CFL1/SMARCA4/TAF11/PPIB/CPSF4/PHB2/PC/KPNA3
GOBP	POLYOL BIOSYNTHETIC PROCESS	59	0.448007	1.63643	0.00286224	0.0176733	0.0123451	4351	tags=49%, list=21%, signal=39%	GCH1/PTS/GOT1/PTAFR/SPTLC2/IPPK/PLCG2/CYP27B1/ITPKC/IMPA2/PCK2/DHFR/PLEK/P2RY1/AGK/P2RY6/PGP/SPTLC1/SPTLC3/CD244/PPIP5K1/CYP2R1/AVPR1B/SPHK1/NTSR1/ACER3/SPR/HRH1/ASAH2B
GOBP	CHAPERONE MEDIATED PROTEIN TRANSPORT	11	0.723294	1.79497	0.00286097	0.0176733	0.0123451	1930	tags=64%, list=9%, signal=58%	TIMM8B/TIMM13/TIMM10/BAG3/TIMM8A/HSPA8/TOR1A
GOBP	RESPIRATORY BURST	32	0.523712	1.69066	0.00285983	0.0176733	0.0123451	2650	tags=34%, list=13%, signal=30%	CD24/PGAM1/CLEC7A/SLAMF8/HCK/RAC2/GRN/NCF2/PIK3CD/CD52/CYBA
GOBP	SOMATIC RECOMBINATION OF IMMUNOGLOBULIN GENE SEGMENTS	53	0.468362	1.68623	0.00285541	0.0176733	0.0123451	5845	tags=58%, list=28%, signal=42%	POLB/EXOSC3/EXO1/BATF/NSD2/MAD2L2/RNF168/PRKDC/TFRC/HMCES/XRCC4/LIG4/HSPD1/ERCC1/MSH3/RNF8/TCF3/IL10/FOXP3/PARP3/TNFSF13/PTPRC/CD28/CD40/TBX21/SLC15A4/MLH1/KMT5C/CLCF1/TP53BP1/PAXIP1
GOBP	ENTRY INTO HOST	148	0.366859	1.54285	0.00281449	0.0174425	0.0121839	4109	tags=38%, list=20%, signal=31%	SERPINB3/KRT6A/TRIM14/EPHA2/CDK1/CXCR4/TMPRSS4/LDLR/PLSCR1/DYNLT1/PHB/TRIM22/PPIA/CXCL8/CTSL/ACE2/IFITM1/P4HB/TRIM62/TRIM21/FCN1/TRIM10/IFITM3/LGALS9/CCR5/SLC52A2/SMPD1/XPR1/SELPLG/ITCH/NPC1/TFRC/VAMP8/TRIM5/SLAMF1/SIVA1/CD86/IDE/EXOC2/SNX3/CLEC4G/ICAM1/CIITA/TRIM25/KPNA3/IFITM2/TNFRSF4/TRIM11/NECTIN2/SLC20A2/CDH1/CD80/PTX3/SLC1A5/HYAL3/GPR15
GOBP	NEGATIVE REGULATION OF T CELL PROLIFERATION	61	0.451244	1.65604	0.00280528	0.0174015	0.0121553	4262	tags=43%, list=20%, signal=34%	CD274/TNFRSF21/IDO1/PLA2G2F/ARG1/CEBPB/GLMN/LGALS9/IL2RA/LILRB4/CD86/CRTAM/TMEM131L/SCRIB/SFTPD/XCL1/CLEC4G/PELI1/CASP3/LILRB2/LILRB1/HLA-G/CD80/IL10/FOXP3/CR1
GOBP	POSITIVE REGULATION OF MEMBRANE POTENTIAL	16	0.669995	1.85528	0.00280404	0.0174015	0.0121553	1945	tags=38%, list=9%, signal=34%	MFN1/VCP/STOML2/BID/MTLN/CTNS
GOBP	ERROR FREE TRANSLESION SYNTHESIS	22	0.594088	1.75863	0.00279238	0.0173536	0.0121218	4746	tags=59%, list=23%, signal=46%	PCNA/VCP/RPA3/UFD1/RFC2/RFC3/POLDIP2/RFC4/NPLOC4/RPA1/POLD1/SPRTN/RFC5
GOBP	NEPHRON TUBULE FORMATION	17	-0.633549	-1.83632	0.00275965	0.0171661	0.0119908	2967	tags=53%, list=14%, signal=45%	IRX3/WNT6/IRX2/NOG/SOX8/GREM1/OSR1/IRX1/GATA3
GOBP	HISTONE MRNA METABOLIC PROCESS	24	0.595838	1.7954	0.00275761	0.0171661	0.0119908	1958	tags=38%, list=9%, signal=34%	EXOSC4/SNRPG/SNRPF/NCBP1/SNRPD3/LSM1/CPSF3/LSM10/SNRPB
GOBP	MITOCHONDRIAL RNA PROCESSING	17	0.644363	1.79794	0.00275761	0.0171661	0.0119908	2661	tags=53%, list=13%, signal=46%	MTO1/PNPT1/FASTKD5/HSD17B10/TRMT10C/ELAC2/TBRG4/PUS1/TRNT1
GOBP	POSITIVE REGULATION OF TYPE I INTERFERON MEDIATED SIGNALING PATHWAY	13	0.69696	1.80575	0.00275583	0.0171661	0.0119908	2306	tags=54%, list=11%, signal=48%	IRF7/WNT5A/MMP12/IKBKE/TBK1/NLRC5/FADD
GOCC	PHAGOCYTIC VESICLE MEMBRANE	76	0.443889	1.68421	0.00272827	0.017034	0.0118985	5241	tags=43%, list=25%, signal=33%	RAB38/ATP6V0D1/ATP6V0B/TAP1/TLR2/TAP2/RAB31/RAB5A/ATG5/CORO1A/RAC2/RAB10/VAMP8/HLA-E/VAMP7/TAPBP/CYBA/ATP6V0E1/STX4/RAB8A/B2M/HLA-F/HLA-B/ATP6V0A2/HLA-G/DNM2/TLR1/HLA-A/ATP6V0C/RAB32/SYT7/CYBB/HLA-C
GOBP	NUCLEOBASE METABOLIC PROCESS	33	0.546051	1.77512	0.00272701	0.017034	0.0118985	3928	tags=52%, list=19%, signal=42%	GDA/TYMP/CTPS1/TYMS/ACP3/GART/SHMT2/APRT/HPRT1/XDH/RRM1/UMPS/GMPS/KDM1A/CAD/GMPR2/MTOR
GOMF	EXTRACELLULAR MATRIX STRUCTURAL CONSTITUENT CONFERRING COMPRESSION RESISTANCE	22	-0.58238	-1.81357	0.00266702	0.0166825	0.011653	5149	tags=50%, list=25%, signal=38%	VCAN/PRG4/BGN/OGN/CHADL/HSPG2/PODN/PRELP/DCN/ASPN/TUFT1
GOBP	MONOSACCHARIDE METABOLIC PROCESS	263	0.312743	1.3975	0.00265583	0.016628	0.011615	4139	tags=31%, list=20%, signal=25%	ENO1/FABP5/TPI1/PGAM1/PGK1/PGM2/GOT2/PPARD/HK2/GOT1/TIGAR/OAS1/GALE/PHLDA2/PGD/FUT2/GSTO1/SLC23A2/PTPN2/MAEA/MDH2/ZMPSTE24/ALDOA/SLC25A13/PMM2/FOXK2/FUT1/GAPDH/SLC2A1/FUOM/PPP1CA/SLC25A10/TALDO1/SIRT7/NUDT5/GPI/ADIPOR1/GALK1/IGFBP3/SESN2/PCK2/MPI/BCKDK/SLC25A11/MDH1/SLC37A4/RBKS/LCMT1/ATF4/SLC2A3/CHST1/PASK/RUBCNL/SDHAF3/PFKFB2/PFKP/PDHB/GLYCTK/TNF/PKM/G6PD/PFKFB4/ADPGK/SLC35B4/DLAT/CREM/PGP/PC/S…
GOBP	PROTEIN KINASE B SIGNALING	242	-0.287939	-1.38701	0.00265491	0.016628	0.011615	3778	tags=31%, list=18%, signal=26%	ANGPT1/GPER1/MSTN/PIK3CA/PTEN/GCNT2/PHLPP1/SFRP5/FGFR3/ERBB3/KLB/FGF1/IL18/ERBB4/DLG1/SIRT1/PHLPP2/PDGFRB/KITLG/LOX/MERTK/NRG2/PEAR1/INSR/LEP/STK3/IGF1R/TNFAIP8L3/MET/ESR1/PDGFA/FGF9/EGF/EGFR/RRAS/OTUD3/HIP1/DDIT3/AKR1C3/PTK2/PIK3CB/FGFR2/ITGB1/GAS6/NTRK2/ZFP36L1/KLF4/FGFR1/PPARA/RICTOR/OSBPL8/IGFBP5/F10/PINK1/DAG1/FERMT2/RTN4/MYOC/TSPYL5/FYN/PLEKHA1/PPP2R5C/IRS1/MAGI2/PIK3R1/AXL/PDGFRA/TCF7L2/SP…
GOBP	REGULATION OF INTRACELLULAR PROTEIN TRANSPORT	243	0.322414	1.43229	0.00265234	0.016628	0.011615	4118	tags=35%, list=20%, signal=28%	ZC3H12A/RAN/IFI27/TFDP1/GZMB/FZD5/NMT1/UBE2L3/YWHAQ/FERMT1/ZPR1/UBE2D3/SFN/ECT2/TMEM30B/IFNG/BCAP31/IL1B/UBL5/ATG13/SIRT7/BAG3/PDCD10/BID/CDK5/HAX1/MTCL1/PDCD5/TCAF2/TMEM30A/EDEM1/NOLC1/RAC2/KIF20B/PLK3/CD36/ITGB2/CIB1/SAE1/DERL2/HRAS/RANGAP1/CASP8/TP63/TXN/TARDBP/YWHAZ/ARIH2/NDEL1/PARK7/PIK3R2/EDEM2/UBE2J2/HCLS1/SREBF2/OAZ1/MFF/HTRA2/MIEF1/DYNLT2B/SP100/LCP1/UBAC2/PKIA/LMAN1/PRKCD/RIOK2/UHMK1/NU…
GOBP	NUCLEOSOME ORGANIZATION	156	0.356638	1.51332	0.0026454	0.0166091	0.0116017	5270	tags=38%, list=25%, signal=29%	RUVBL1/H2AX/PSME4/CENPN/MACROH2A1/KNL1/CENPW/CENPX/MCM2/ASF1B/OIP5/HJURP/CENPM/CENPK/CENPA/IPO4/POLE3/CENPS/HAT1/SMARCD3/NASP/NPM1/GRWD1/CENPH/CENPI/NAP1L4/HMGB2/H2BC9/MACROH2A2/H3C10/PAF1/ZNHIT1/MIS18A/SMARCA4/SMARCA5/HMGA1/RNF8/SPTY2D1/DAXX/CENPL/CHAF1A/NAA60/CENPO/H2BC10/CENPU/H1-2/CHAF1B/H3C7/H2BC12/H3C8/H4C4/H4C9/H2BC13/H1-5/RBBP4/H2BC6/H4C2/SRCAP/CENPQ/H1-3
GOBP	HEART GROWTH	81	-0.38992	-1.62297	0.00264049	0.0165939	0.0115911	4567	tags=42%, list=22%, signal=33%	AKAP6/PI16/S1PR1/TGFB2/KCNK2/PARP2/SAV1/PTEN/FOXC2/VGLL4/ERBB4/JARID2/RGS2/PDLIM5/YAP1/EDN1/NOG/FOXC1/FGFR2/SORBS2/BMPR1A/PPARA/DIPK2A/MEF2C/RBP4/AKAP13/WNT2/ADRA1A/RBPJ/MAPK1/TGFBR2/ZFPM2/MEIS1/TGFBR3
GOBP	ENDOCARDIAL CUSHION FORMATION	24	-0.569611	-1.80396	0.00262928	0.0165389	0.0115527	5056	tags=50%, list=24%, signal=38%	SMAD4/MSX1/TMEM100/TGFB2/BMP2/ROBO2/NOG/BMPR1A/RBPJ/TGFBR2/BMP7/DCHS1
GOBP	SCHWANN CELL DEVELOPMENT	27	-0.564895	-1.85071	0.00262278	0.0165134	0.0115349	2995	tags=41%, list=14%, signal=35%	POU3F1/LGI4/FA2H/NTRK2/LAMB2/DAG1/SKI/MYOC/PARD3/SOD1/ARHGEF10
GOBP	CYTOKINE PRODUCTION INVOLVED IN INFLAMMATORY RESPONSE	48	0.476542	1.68402	0.002614	0.0164736	0.0115071	4090	tags=42%, list=20%, signal=34%	ZC3H12A/NOD2/CLEC7A/MYD88/PYCARD/PLA2G3/HIF1A/GBP5/STAT3/NOS2/CD6/IL6/LILRB4/TNF/NLRC3/NLRP7/PLD4/MAPK14/IL17F/GPSM3
GOBP	PYRIMIDINE NUCLEOTIDE METABOLIC PROCESS	47	0.48351	1.69032	0.0026138	0.0164736	0.0115071	1935	tags=28%, list=9%, signal=25%	TYMP/UPP1/UCK2/NME1/CTPS1/TYMS/ENTPD7/CMPK2/DTYMK/TDG/UMPS/DCTPP1/SMUG1
GOBP	REGULATION OF LEUKOCYTE DEGRANULATION	42	0.512628	1.7498	0.00260946	0.0164736	0.0115071	4049	tags=48%, list=19%, signal=38%	IL4R/PTAFR/PLA2G3/LYN/HMOX1/CD177/SYK/RAC2/LGALS9/ITGB2/VAMP8/C12orf4/VAMP7/ADGRE2/STX4/CCR2/HLA-F/UNC13D/CD300A/FGR
GOBP	SOMITE DEVELOPMENT	81	-0.390367	-1.62483	0.00258688	0.0163487	0.0114198	5538	tags=46%, list=27%, signal=34%	NUP133/SFRP1/POFUT1/MED12/SFRP2/DLL1/EP300/PCDH8/SMAD4/LOXL3/SEMA3C/WNT11/PPP2R3A/ATM/KAT2A/XRCC2/FOXC2/MIB1/MEOX1/NKD1/NOG/DMRT2/LRP6/FOXC1/BMPR1A/ROR2/FRZB/ALDH1A2/SMAD3/RBPJ/MEOX2/PTCH1/LFNG/PLXNA2/WDR19/AXIN2/COBL
GOBP	SOMATIC DIVERSIFICATION OF IMMUNOGLOBULINS	61	0.453758	1.66527	0.00257744	0.0163044	0.0113889	5845	tags=54%, list=28%, signal=39%	POLB/EXOSC3/EXO1/BATF/NSD2/POLQ/MAD2L2/RNF168/PRKDC/TFRC/HMCES/XRCC4/LIG4/HSPD1/ERCC1/MSH3/RNF8/TCF3/SAMHD1/IL10/FOXP3/PARP3/TNFSF13/PTPRC/CD28/CD40/TBX21/SLC15A4/MLH1/KMT5C/CLCF1/TP53BP1/PAXIP1
GOBP	RHO PROTEIN SIGNAL TRANSDUCTION	133	-0.324865	-1.45983	0.00257116	0.01628	0.0113718	3680	tags=30%, list=18%, signal=25%	LPAR4/ARHGEF2/NRP1/GNA12/GNA13/RIPOR1/ABL1/PDGFRB/ARHGEF1/RTN4R/NET1/F2R/MET/APOE/ARHGAP35/ARHGAP42/PLEKHG5/RHOB/SCAI/NTN1/RHOJ/CTNNAL1/STARD13/AKAP13/ROCK2/ARHGAP6/ADRA1A/ARHGAP29/ARHGEF12/MYOC/BCL6/LPAR1/EPS8/ADRA2A/AGTR1/DLC1/ARHGEF28/ARHGEF10/KANK1/KANK2
GOBP	NEGATIVE REGULATION OF CELL ACTIVATION	185	0.341842	1.46875	0.00254292	0.0161163	0.0112575	4814	tags=37%, list=23%, signal=29%	ZC3H12A/CD274/IL4R/TNFRSF21/LDLR/HMGB3/IDO1/PTPN2/IRF1/PLA2G2F/SAMSN1/CST7/ARG1/CEBPB/JAK3/LYN/SOCS1/CBFB/HMOX1/TIGIT/ZC3H8/GLMN/LGALS9/PTPN22/THBD/LAG3/GRN/IL2RA/PGLYRP2/LILRB4/LAPTM5/CD86/CRTAM/TMEM131L/SCRIB/SFTPD/XCL1/PGLYRP3/CLEC4G/ANXA1/PELI1/CASP3/TYROBP/PRKCD/CCR2/TNFRSF13B/LILRB2/PAG1/HLA-F/TBC1D10C/MNDA/LILRB1/HLA-G/CD300A/CD80/IL10/FOXP3/FGR/PARP3/CD300LF/LST1/CR1/PTPRC/SH2B3/INHA/FOXF…
GOMF	TUMOR NECROSIS FACTOR RECEPTOR SUPERFAMILY BINDING	49	0.484805	1.72501	0.0025372	0.0160953	0.0112428	4500	tags=51%, list=22%, signal=40%	STAT1/MYD88/CFLAR/TNFSF10/LTB/TRAP1/BID/TRAF1/TRAF3/BEX3/CASP8/FADD/BABAM2/SIVA1/TNFSF9/TNF/FASLG/TNFSF15/TRADD/CASP3/TNFSF13B/TRAF4/TRAF2/TNFSF13/TNFSF14
GOBP	TRANSFERRIN TRANSPORT	35	0.525584	1.74056	0.00253699	0.0160953	0.0112428	4452	tags=46%, list=21%, signal=36%	ATP6V0D1/ATP6V1B2/ATP6V1G1/ATP6V0B/ATP6V1F/ATP6V1D/ATP6V1C1/ATP6V1C2/TFRC/ATP6V1H/ATP6V1A/ATP6V0E1/STEAP3/ATP6V0A2/ARHGAP1/DNM2
GOBP	NUCLEAR TRANSCRIBED MRNA CATABOLIC PROCESS EXONUCLEOLYTIC	35	0.525636	1.74074	0.00253699	0.0160953	0.0112428	3878	tags=49%, list=19%, signal=40%	EXOSC4/LSM2/LSM7/EXOSC3/LSM1/DIS3/LSM5/EXOSC1/LSM4/POLR2G/EXOSC2/EXOSC5/LSM6/SKIV2L/CNOT6/EXOSC8/DCPS
GOBP	POSITIVE REGULATION OF RRNA PROCESSING	10	0.74405	1.79681	0.00253652	0.0160953	0.0112428	4137	tags=80%, list=20%, signal=64%	DIMT1/SIRT7/TRMT112/UTP15/RIOK1/RIOK2/HEATR1/BUD23
GOCC	MYOFILAMENT	23	-0.570875	-1.80167	0.00253638	0.0160953	0.0112428	2023	tags=48%, list=10%, signal=43%	TMOD2/ACTA1/TNNC2/FHOD3/TNNT1/TPM2/TNNC1/TNNI2/LMOD1/TPM1/TMOD1
GOBP	ALCOHOL METABOLIC PROCESS	352	0.30221	1.38604	0.00253503	0.0160953	0.0112428	4357	tags=32%, list=21%, signal=26%	AKR1B10/IDH3A/TPI1/RAN/GDPD3/GCH1/PTS/PPARD/APOL1/GOT1/MOXD1/LDLR/GK/PTAFR/CYP7B1/ALDH1A3/SPTLC2/IPPK/RDH10/DHRS9/DPAGT1/SRD5A3/PCSK9/SQLE/APOL2/PLCG2/CH25H/TTC39B/RDH16/PLCD1/CYP27B1/ITPKC/RDH12/ADH7/NFKB1/GBA2/ABCG1/DGAT1/DHRS13/ALDH2/IMPA2/IDH2/IDH3B/FDXR/INPP1/COQ2/EBP/ALDH3B2/GALK1/SULT2B1/PCK2/COQ3/MTMR2/DHFR/SMPD1/SEC14L2/NPC1/PLEK/LPCAT3/MINPP1/CYP27C1/BPNT1/ARV1/SDR16C5/KPNB1/SULT1E1/NSD…
GOBP	REGULATION OF NERVOUS SYSTEM DEVELOPMENT	401	-0.261001	-1.33375	0.00252987	0.0160953	0.0112428	4588	tags=32%, list=22%, signal=26%	CUX2/NUMB/SHTN1/LRP1/HEY1/SEMA3A/NRXN1/CERS2/RND2/FLRT2/CTNNB1/TRPC6/OBSL1/RUFY3/SORL1/SERPINF1/BMP2/EGR2/XRCC2/AMIGO1/RNF112/LINGO2/GPER1/SS18L1/SEMA6D/PTEN/NRP1/HOOK3/PLXND1/VEGFC/EFNB3/RELN/TIAM2/SLITRK2/TG/DLG1/ANKRD27/SRPX2/ROBO2/HES1/CBLN1/CXCL12/NAP1L1/JAM2/RTN4R/SOX10/SPEN/ZNF365/SHOX2/SEMA3E/GOLGA4/NPTN/YAP1/MACF1/L1CAM/PRUNE1/SLIT2/SNW1/NOG/IL6ST/CLSTN1/LGI4/SOX8/BHLHB9/FZD3/SPART/SEMA4…
GOCC	MITOTIC SPINDLE MIDZONE	14	0.684691	1.80901	0.00250825	0.0160175	0.0111885	1894	tags=50%, list=9%, signal=45%	AURKB/KIF18B/PRC1/CENPE/KIF18A/KIF20B/RCC2
GOBP	REGULATION OF MUSCLE ADAPTATION	78	-0.385548	-1.59552	0.00249443	0.0159444	0.0111374	3200	tags=33%, list=15%, signal=28%	PDE9A/FOXO1/JARID2/AGT/RGS2/EDN1/IL6ST/PRKCA/FOXO3/SGCA/CAMK2G/KLF4/PPARA/FBXO32/PPARGC1A/IGFBP5/DAG1/LMCD1/ROCK2/ADRA1A/SMAD3/ATP2B4/TNNT1/TNNC1/MEF2A/UTRN
GOCC	CYCLIN DEPENDENT PROTEIN KINASE HOLOENZYME COMPLEX	42	0.513968	1.75438	0.00249284	0.0159444	0.0111374	3679	tags=52%, list=18%, signal=43%	CCNB1/CDK1/CCNB2/CKS2/PCNA/CCNE1/CCNA2/CCNE2/CCNF/CDKN1A/BCCIP/CKS1B/CCND2/CCNO/CDK7/CDK2/RB1/CCNH/CDK9/CCND3/CDKN2D/CDK4
GOBP	NUCLEOTIDE PHOSPHORYLATION	128	0.37421	1.55054	0.00248972	0.0159444	0.0111374	4978	tags=42%, list=24%, signal=32%	ENO1/TPI1/PGAM1/PGK1/HK2/NME1/TIGAR/CMPK2/HIF1A/EIF6/DTYMK/NUP37/NUP210/LDHA/ALDOA/FOXK2/NUP88/IFNG/GAPDH/PNKP/GPI/AK1/GALK1/NUP50/RAE1/DHTKD1/SEC13/PFKFB2/PFKP/NUP155/PKM/NDC1/PFKFB4/ADPGK/NUP188/PRKAG1/NUP85/NUP205/OGDHL/ENO3/PGK2/NME7/NUP58/NUP107/NUP93/POM121/HK3/NUP160/ZBTB7A/NUP35/NUP42/ENTPD5/BPGM/NME6
GOBP	T HELPER 17 TYPE IMMUNE RESPONSE	32	0.528698	1.70676	0.00248883	0.0159444	0.0111374	5931	tags=62%, list=28%, signal=45%	ZC3H12A/NFKBIZ/PRKCQ/ENTPD7/PHB/STAT3/IL12B/IL6/IL23A/BATF/NFKBID/IL12RB1/FOXP3/NLRP10/MALT1/TBX21/SLAMF6/IL6R/IRF4/TNFSF18
GOMF	HEME COPPER TERMINAL OXIDASE ACTIVITY	27	0.579375	1.80032	0.00244753	0.0157044	0.0109698	4183	tags=56%, list=20%, signal=44%	COX6B1/COX7B/COX5A/COX8A/C15orf48/COX7A2P2/COX7A2/NDUFA4/COX6A1/COX10/COX7C/COX5B/COX4I1/COX7B2/COX6C
GOBP	CALCIUM DEPENDENT CELL CELL ADHESION VIA PLASMA MEMBRANE CELL ADHESION MOLECULES	42	-0.490165	-1.79417	0.00244067	0.0156754	0.0109495	5439	tags=52%, list=26%, signal=39%	CDH13/AJUBA/PCDHB3/CDH6/PCDHB6/CDH5/PCDHB13/PCDH12/CDHR3/PCDHB11/DSG1/CDH10/PCDHB14/PCDHB2/PCDHB10/NLGN1/PCDHB4/PCDHB5/CDH12/CDH19/DCHS1/PCDHB16
GOBP	REGULATION OF PROTEIN POLYUBIQUITINATION	24	0.59956	1.80662	0.00243882	0.0156754	0.0109495	3725	tags=46%, list=18%, signal=38%	NMI/NOD2/TRIP12/PPIA/OTUB2/UBE2D1/PTPN22/PLAA/FBXO4/OTUB1/PARP10
GOBP	MITOTIC NUCLEAR MEMBRANE ORGANIZATION	10	0.745037	1.7992	0.00240561	0.0154798	0.0108129	3897	tags=70%, list=19%, signal=57%	PPP2CA/PPP2R2A/REEP4/VRK1/ANKLE2/PPP2R1A/EMD
GOBP	ADRENERGIC RECEPTOR SIGNALING PATHWAY	28	-0.535226	-1.76741	0.00240447	0.0154798	0.0108129	2662	tags=39%, list=13%, signal=34%	RGS2/ADCY9/ADRB1/AKAP13/ADRA1A/ATP2B4/RAPGEF2/PLN/LMBRD2/ADRA2A/ADRB2
GOBP	SPECIFICATION OF ANIMAL ORGAN IDENTITY	33	-0.529797	-1.83925	0.00239457	0.0154383	0.0107839	3262	tags=42%, list=16%, signal=36%	FGF1/BMP4/ROBO2/DKK1/FGFR2/MEF2C/HOXA11/WNT2/RBPJ/SPRY1/AR/GLI3/WNT2B/AXIN2
GOBP	SOMATIC DIVERSIFICATION OF IMMUNE RECEPTORS	72	0.436638	1.64046	0.00237808	0.0153467	0.01072	4824	tags=44%, list=23%, signal=34%	POLB/EXOSC3/EXO1/BATF/NSD2/POLQ/MAD2L2/RNF168/ADAR/PRKDC/TFRC/HMCES/XRCC4/HMGB2/LIG4/HSPD1/LEF1/ERCC1/MSH3/RNF8/TCF3/SAMHD1/IL10/FOXP3/DCAF1/PARP3/TNFSF13/PTPRC/CD28/CD40/TBX21/SLC15A4
GOBP	RIBOSOMAL LARGE SUBUNIT BIOGENESIS	69	0.435717	1.62779	0.00237075	0.0153142	0.0106972	3572	tags=43%, list=17%, signal=36%	RPL26L1/NOP16/WDR12/EIF6/NHP2/HEATR3/NOP2/DDX28/FASTKD2/NIP7/MRTO4/SNU13/GTPBP4/MRPL20/EBNA1BP2/PPAN/RRP15/BOP1/WDR74/NOC2L/TRAF7/NPM1/RPF2/PES1/NIFK/MRPL1/NLE1/RRS1/PAK1IP1/RPLP0
GOMF	WIDE PORE CHANNEL ACTIVITY	26	0.590871	1.81043	0.002366	0.0152982	0.010686	3884	tags=42%, list=19%, signal=34%	GJB2/GJB6/PANX1/TOMM40L/PRF1/VDAC2/TOMM40/VDAC1/VDAC3/GJA5/GJA1
GOMF	PROTEIN HETERODIMERIZATION ACTIVITY	288	0.319432	1.43983	0.00236023	0.0152755	0.0106702	4656	tags=36%, list=22%, signal=28%	PDSS1/RAN/H2AX/PAFAH1B3/BCL2A1/KATNB1/MACROH2A1/H2AZ1/AURKA/IRAK2/BAK1/HIF1A/PPP2CA/CENPW/PGLYRP4/PHB/IRAK1/POLE4/TOP2A/PRMT5/VAPA/CENPA/ABCG4/CEBPB/SNX1/ABCG1/CD3D/H2AJ/P4HB/POLE3/IL12B/ALG2/CENPS/NOLC1/LSM5/GTF2A2/PSMF1/TENM2/RCC1/SAE1/TAF13/CD3G/ATP1B1/IKBKG/TRMT112/SLC51A/SUPT7L/BTBD11/BDKRB2/ATF4/BOK/TPM4/H2BC9/RRAGC/PIK3R2/P2RY1/MACROH2A2/EXT1/CYBA/LSM6/H3C10/MLX/ATP1A1/BAX/PGLYRP3/TAF11/GA…
GOBP	RNA CAPPING	33	0.550656	1.79009	0.00235725	0.015271	0.010667	5055	tags=48%, list=24%, signal=37%	POLR2H/NCBP1/POLR2F/POLR2L/CMTR2/POLR2G/POLR2D/NCBP3/CDK7/POLR2E/CCNH/POLR2I/POLR2J/RAMAC/RNGTT/GTF2H1
GOBP	POSITIVE REGULATION OF GLUCOSE TRANSMEMBRANE TRANSPORT	43	-0.477274	-1.75633	0.0023479	0.0152251	0.010635	3484	tags=40%, list=17%, signal=33%	C2CD5/RAP1A/C3/INSR/ADIPOQ/RHOQ/CLIP3/GPC3/OSBPL8/BRAF/KLF15/IRS1/PIK3R1/CREBL2/SORBS1/IRS2/MEF2A
GOCC	PLASMA MEMBRANE BOUNDED CELL PROJECTION CYTOPLASM	210	-0.30254	-1.42977	0.00234659	0.0152251	0.010635	4849	tags=31%, list=23%, signal=24%	MAPK8IP3/DNAH8/INPP5E/MAPT/MGARP/DYNC1H1/KIF17/ARMCX3/DNAH9/CFAP36/CEP162/BBS7/AK8/ARL6/DYNC2LI1/EFHC2/SPATA7/DNAL1/AP3M2/TTC30A/IFT172/ZC3H14/SEPTIN2/KIF5C/DRC3/KCNAB1/ARL8A/LCA5/CFAP91/DZIP1L/LRRK2/TRAK1/DYNC2H1/SFPQ/DNAI7/DYNC2I1/TRAF3IP1/PURA/TERF2/TULP3/DST/TRAK2/SEPTIN7/CCDC113/MAP2/CAMSAP3/BBS1/GABARAPL1/AP3S1/MAPK1/WDR35/WDPCP/MAP1A/PAFAH1B1/ATG14/TMEM108/SPAG16/DLG2/EFHC1/GLI2/GLI3/SYBU/…
GOCC	GOLGI LUMEN	91	-0.375849	-1.60167	0.002345	0.0152251	0.010635	4870	tags=36%, list=23%, signal=28%	PROS1/WNT6/GOLIM4/PDGFB/BGN/PCSK5/MUC1/CSPG4/BPNT2/WNT5B/APP/WNT7B/MUCL1/MMP16/OGN/RAB33B/MUC7/GPC1/HSPG2/SOD3/PDGFA/OMD/MUC15/GPC4/GPC6/GAS6/GPC3/PRELP/F10/DAG1/SDC4/DCN/SDC2
GOBP	SEQUESTERING OF METAL ION	14	0.686212	1.81303	0.00234431	0.0152251	0.010635	1034	tags=36%, list=5%, signal=34%	LCN2/S100A9/S100A8/S100A7/AP3D1
GOBP	REGULATION OF CARDIAC MUSCLE CELL DIFFERENTIATION	15	-0.656326	-1.84773	0.00232957	0.0151648	0.0105929	5282	tags=80%, list=25%, signal=60%	DLL1/SMAD4/KAT2A/BMP2/BMP4/DKK1/FZD7/GREM1/MEF2C/MYOCD/SOX6/EFNB2
GOMF	PROTEIN KINASE A BINDING	51	-0.453116	-1.72215	0.00231159	0.0150624	0.0105213	4594	tags=45%, list=22%, signal=35%	AKAP8/AKAP6/DACT2/RARA/AKAP3/RDX/CRYBG3/MYRIP/WASF2/DACT3/PRRC1/LRRK2/DACT1/C2orf88/WASF3/PRKAR2B/AKAP1/AKAP12/GSK3B/AKAP11/AKAP13/AKAP9/PJA2
GOBP	REGULATION OF CD8 POSITIVE ALPHA BETA T CELL ACTIVATION	18	0.651185	1.84666	0.00230333	0.0150231	0.0104939	3674	tags=56%, list=18%, signal=46%	CD274/IRF1/SOCS1/CBFB/PTPN22/LILRB4/HLA-E/CRTAM/XCL1/LILRB1
GOBP	LENS DEVELOPMENT IN CAMERA TYPE EYE	76	-0.409546	-1.68516	0.00229842	0.0150056	0.0104817	3687	tags=36%, list=18%, signal=29%	SIX5/CRYBG3/WNT5B/NECTIN3/DLG1/SPRED2/BMP4/WNT7B/SPRED1/NHS/SKI/WNT2/MAF/SMAD3/ABI2/TGFBR2/VIM/CDON/SPRY1/SLITRK6/TMOD1/SPRY2/MEIS1/BCAR3/WNT2B/CRYAB/GATA3
GOBP	POSITIVE REGULATION OF LYMPHOCYTE DIFFERENTIATION	98	0.401137	1.59249	0.00229636	0.0150056	0.0104817	4704	tags=48%, list=23%, signal=37%	NFKBIZ/PNP/IL4R/CD83/VNN1/SASH3/RHOH/AP3D1/IFNG/SOCS1/CBFB/IL12B/XRCC6/SYK/IL7R/LGALS9/CCL19/CD27/AP3B1/IL23A/PRKDC/IL2RA/ADAM8/LILRB4/TNFSF9/CD86/LEF1/IL36B/NFKBID/IL1RL2/ANXA1/HLA-DRA/IL12RB1/LILRB2/IL15/ZAP70/NLRP3/HLA-G/CD80/IL10/FOXP3/XBP1/CR1/PTPRC/MALT1/NKAP/PPP2R3C
GOBP	DNA DEPENDENT DNA REPLICATION MAINTENANCE OF FIDELITY	47	0.486207	1.69975	0.00229611	0.0150056	0.0104817	4287	tags=43%, list=21%, signal=34%	TIMELESS/PCNA/RAD51/CENPX/DONSON/ALYREF/CENPS/DNA2/GEN1/BLM/BRCA2/MSH3/EME1/RFWD3/CDK9/MCM9/SAMHD1/ATR/TIPIN/POLD1
GOBP	POSITIVE REGULATION OF NEURON DIFFERENTIATION	87	-0.376723	-1.59494	0.0022854	0.0149642	0.0104528	3925	tags=43%, list=19%, signal=35%	IRX3/FOXA1/TRIM32/KDM4C/NCOA1/TRPC6/BMP2/BMP6/RNF112/FEZ1/SOCS2/ARHGEF2/PTEN/SIN3A/BMP4/MMD/CXCL12/ZC4H2/TCF12/NBL1/GPRC5B/CSNK1D/FGFR1/GDF7/MEF2C/ZEB1/ETV5/TIMP2/BMP7/GATA2/BCL6/PCP4/NAP1L2/CDON/GLI2/TCF4/MAP1B
GOMF	GTPASE ACTIVATOR ACTIVITY	249	-0.287567	-1.39791	0.00228259	0.0149604	0.0104501	5401	tags=43%, list=26%, signal=32%	SIPA1L1/CHM/OPHN1/SYDE2/ACAP3/FLCN/ARHGAP33/TSC2/OCRL/TBC1D4/ARHGAP23/TBC1D8B/ARHGAP17/GAPVD1/TBC1D12/IQGAP2/GDI1/ARHGAP21/ARHGAP18/TBC1D9B/NF1/RGS5/TBC1D1/RASGRP3/WNT11/DAB2IP/FAM13B/NPRL3/ARHGAP19/ARHGAP44/TBC1D17/RAB3GAP2/RUNDC1/GRTP1/ARHGEF10L/PREX2/GNAQ/ALS2/SOS1/ALDH1A1/NRP1/RABEP1/TIAM2/ASAP3/TBC1D8/AGAP9/SRGAP3/ANKRD27/RASA4/AGAP4/ARHGEF1/STXBP5/TBC1D2B/LARS1/ARHGAP24/LRRK2/ARHGAP10/RASA3…
GOMF	NEUTRAL AMINO ACID TRANSMEMBRANE TRANSPORTER ACTIVITY	32	0.531487	1.71576	0.00227241	0.0149083	0.0104137	5325	tags=62%, list=26%, signal=47%	SLC6A14/SLC7A11/SFXN1/SLC7A5/SLC38A5/SLC36A1/SFXN2/SLC3A2/SLC38A9/SLC38A7/SLC6A20/SLC36A4/SLC43A2/SLC1A1/SLC1A5/SLC1A4/SLC6A19/SLC6A6/SLC38A6/SLC7A8
GOBP	REGULATION OF LEUKOCYTE APOPTOTIC PROCESS	78	0.419212	1.59735	0.00225025	0.0147773	0.0103222	3351	tags=42%, list=16%, signal=36%	CD274/IRF7/WNT5A/NOD2/SLC7A11/PRELID1/PRKCQ/AURKB/CCR7/HIF1A/IDO1/ADAM17/JAK3/LYN/ZC3H8/IL7R/RIPK3/LGALS9/CCL19/CD27/DOCK8/NOC2L/CD3G/ADAM8/FADD/PIK3CD/TCP1/HCLS1/CCL5/CDKN2A/BAX/ANXA1/BCL10
GOBP	DENDRITIC CELL CHEMOTAXIS	24	0.603322	1.81795	0.00221566	0.0145644	0.0101735	3377	tags=50%, list=16%, signal=42%	CXCR2/CXCR4/C1QBP/CCR7/SLAMF8/LGALS9/CCL19/CCR5/GPR183/CCL5/CCR1/CCR2
GOBP	MACROPHAGE ACTIVATION	93	0.418447	1.64364	0.00220952	0.0145383	0.0101552	2901	tags=29%, list=14%, signal=25%	ZC3H12A/NMI/WNT5A/CTSC/IL4R/LDLR/PLA2G3/IFNGR1/TLR2/IFI35/TNIP2/CST7/IFNG/MIF/MFHAS1/SBNO2/SYK/IL6/ITGB2/GRN/GPR137B/JMJD6/HSPD1/SHPK/TLR8/TNF/TREM2
GOBP	SCHWANN CELL DIFFERENTIATION	35	-0.51274	-1.79061	0.00220177	0.0145014	0.0101295	3891	tags=46%, list=19%, signal=37%	EGR2/LAMA2/ERBB3/POU3F1/GPC1/LGI4/FA2H/NTRK2/LAMB2/DAG1/SKI/MYOC/PARD3/NAB1/SOD1/ARHGEF10
GOCC	DNA POLYMERASE COMPLEX	20	0.627686	1.81414	0.00219666	0.014482	0.0101159	3406	tags=55%, list=16%, signal=46%	POLE2/POLE4/POLE3/POLD2/MCM3/DNA2/MAD2L2/POLA2/PRIM1/POLD4/POLD3
GOBP	MESENCHYMAL CELL PROLIFERATION	38	-0.493782	-1.76539	0.002196	0.014482	0.0101159	4986	tags=58%, list=24%, signal=44%	TBX1/FAT4/WNT11/MSX1/LRP5/BMP2/PRRX1/BMP4/SHOX2/PDGFA/FGFR2/BMPR1A/GPC3/PTN/WNT2/NFIB/TGFBR2/BMP7/OSR1/DCHS1/CTNNBIP1/IRS2
GOCC	LARGE RIBOSOMAL SUBUNIT	108	0.397934	1.60672	0.00217993	0.0144	0.0100586	3344	tags=42%, list=16%, signal=35%	MRPL15/MRPL51/RPL26L1/MRPL35/MRPL47/MRPL13/MRPL46/MRPL37/MRPL3/MRPL27/MRPL36/MRPL11/MRPL17/MRPL42/MRPL52/NDUFAB1/MRPL32/MRPL14/MRPL20/MRPL58/MRPL54/MRPL19/MRPL50/MRPL4/MRPL16/MRPL22/MRPL12/MRPL21/MRPL41/MRPL39/MRPL23/MPV17L2/MRPL28/MRPL18/MRPS30/MRPL55/MRPL48/MRPL57/MRPS18A/RPL39L/MRPL34/MRPL10/MRPL1/MRPL44/MRPL9
GOBP	CYTOPLASMIC PATTERN RECOGNITION RECEPTOR SIGNALING PATHWAY	68	0.447603	1.66794	0.00216534	0.0143177	0.0100011	3551	tags=37%, list=17%, signal=31%	IRF7/NOD2/UBE2N/C1QBP/NLRX1/IFIH1/IRAK2/PHB/IRAK1/TRIM15/UFD1/USP15/DDX60/CLPB/DHX58/BIRC3/PTPN22/ITCH/IKBKG/CASP8/MAP2K6/DDX58/SLC15A3/PHB2/NPLOC4
GOBP	REGULATION OF DNA BINDING TRANSCRIPTION FACTOR ACTIVITY	415	0.298339	1.3845	0.00216302	0.0143164	0.0100002	4261	tags=31%, list=20%, signal=25%	S100A12/S100A9/ZC3H12A/TRIM14/WNT5A/NOD2/LTF/S100A8/TFDP1/UBE2N/MYD88/PRKCQ/SGK1/PYCARD/IRAK2/PRKCH/EZH2/LRP8/ID1/PPARGC1B/CFLAR/TRIM22/PPIA/CARD14/IRAK1/TLR2/STAT3/TRIM15/BUD31/AIM2/FOSL1/ADGRF1/LAMTOR5/RIPK4/NFKB1/IL1B/TRIM62/TRIM21/NFKBIE/COPS5/HMOX1/FANCD2/HCK/SYK/IL18RAP/RPS6KA4/TRAF1/IL6/RIPK3/CD36/TRAF3/LGALS9/COMMD1/ITGB2/CIB1/PIM1/MAD2L2/ITCH/IKBKG/PYDC1/CARD16/TFRC/NPM1/TRIM5/NLRC5/DDRG…
GOBP	NEGATIVE REGULATION OF MUSCLE CONTRACTION	20	-0.617418	-1.87423	0.00215525	0.014279	0.00997414	2662	tags=55%, list=13%, signal=48%	RGS2/DOCK5/DOCK4/BIN1/ARHGAP42/KCNMA1/PRKG1/TNNT1/ATP1A2/SOD1/ADRB2
GOBP	DEVELOPMENT OF PRIMARY FEMALE SEXUAL CHARACTERISTICS	96	-0.367503	-1.58209	0.00215168	0.0142695	0.00996746	4413	tags=38%, list=21%, signal=30%	DMC1/ATM/TIPARP/GAS2/TAF4/UBE3A/ZNF830/SIRT1/ROBO2/KITLG/DACH1/LEP/GNRH1/SLIT2/LHCGR/ESR1/CTNNA1/PGR/SLIT3/FOXC1/ZFX/BMPR1B/ZFPM2/FZD4/IMMP2L/STAT5B/PLEKHA1/ACVR1B/NUPR1/PDGFRA/INHBB/FST/KIT/BCL2/SOD1/ANG
GOBP	POSITIVE REGULATION OF LYMPHOCYTE APOPTOTIC PROCESS	15	0.679232	1.83721	0.00214378	0.0142311	0.00994066	3006	tags=60%, list=14%, signal=51%	CD274/WNT5A/PRELID1/IDO1/ZC3H8/LGALS9/ADAM8/CCL5/BAX
GOMF	OLFACTORY RECEPTOR ACTIVITY	86	0.422976	1.6402	0.00213581	0.0141923	0.00991353	9971	tags=77%, list=48%, signal=40%	OR2L2/OR51E1/OR1E3/OR7C2/OR51E2/OR1F2P/OR1J2/OR11A1/OR2W1/OR1G1/OR2J3/OR5P3/OR7A17/OR4D2/OR51I1/OR2F1/OR1D2/OR1E1/OR4D1/OR51M1/OR7C1/OR1F1/OR10H2/OR2B2/OR2C1/OR51I2/OR2K2/OR3A1/OR5L2/OR1C1/OR1I1/OR2S2/OR8B8/OR2I1P/OR1J4/OR5V1/OR1Q1/OR7E24/OR10A4/OR8D2/OR1A2/OR2F2/OR5H1/OR10H1/OR51B5/OR8D1/OR2J2/OR10A5/OR2B3/OR51B4/OR2L13/OR7A5/OR5P2/OR12D3/OR10D3/OR14J1/OR51J1/OR52D1/OR5J2/OR51B6/OR9A1P/OR2H2/OR1…
GOBP	POSITIVE REGULATION OF MUSCLE CELL DIFFERENTIATION	69	-0.406248	-1.63501	0.0021167	0.0140792	0.00983453	5524	tags=48%, list=26%, signal=35%	CAMK1/MYLK3/IGF1/RBM24/TRIM32/TBX1/MAMSTR/AKAP6/CTNNB1/KAT2A/PARP2/GPER1/EFEMP2/SETD3/SIRT1/ABL1/BMP4/RBM4/SHOX2/EDN1/CTNNA1/GREM1/MEF2C/MYOCD/CYP26B1/BNIP2/CDON/PIAS1/KIT/BCL2/EFNB2/MEF2A/BOC
GOBP	EMBRYONIC SKELETAL JOINT MORPHOGENESIS	10	-0.741985	-1.85833	0.00209883	0.0139741	0.00976117	4184	tags=80%, list=20%, signal=64%	CTNNB1/BMP4/SHOX2/NOG/HOXA11/BMP7/OSR1/OSR2
GOBP	PIGMENT BIOSYNTHETIC PROCESS	55	0.465645	1.68883	0.00209329	0.0139511	0.00974506	4573	tags=51%, list=22%, signal=40%	CDH3/WNT5A/SLC7A11/SRRD/GART/SHMT2/ALAS1/APRT/HMBS/HPRT1/GPR143/FECH/CTNS/GIPC1/COX10/PMEL/SLC25A39/GMPS/UROS/FXN/TSPO/TYRP1/OPN3/CPOX/ATP5IF1/TYR/PAICS/SLC45A2
GOCC	STRIATED MUSCLE THIN FILAMENT	20	-0.617827	-1.87547	0.00208961	0.0139404	0.00973759	2023	tags=55%, list=10%, signal=50%	TMOD2/ACTA1/TNNC2/FHOD3/TNNT1/TPM2/TNNC1/TNNI2/LMOD1/TPM1/TMOD1
GOBP	MATURATION OF 5 8S RRNA FROM TRICISTRONIC RRNA TRANSCRIPT SSU RRNA 5 8S RRNA LSU RRNA	24	0.607427	1.83032	0.00208814	0.0139404	0.00973759	4612	tags=58%, list=22%, signal=45%	WDR12/EXOSC3/BOP1/NOP14/RPP40/EXOSC2/ERI1/PES1/ERI2/ABT1/RRS1/EXOSC8/NOL9/URB1
GOMF	FMN BINDING	15	0.679669	1.8384	0.00207832	0.0138927	0.00970426	3024	tags=53%, list=14%, signal=46%	PNPO/POR/NOS2/MTRR/NDUFV1/NDOR1/PPCDC/DUS2
GOBP	PYRIMIDINE CONTAINING COMPOUND BIOSYNTHETIC PROCESS	37	0.529688	1.76308	0.0020689	0.0138435	0.00966992	1723	tags=30%, list=8%, signal=27%	TYMP/UPP1/TK1/UCK2/NME1/CTPS1/TYMS/CMPK2/DTYMK/PUDP/UMPS
GOBP	DORSAL VENTRAL NEURAL TUBE PATTERNING	19	-0.629783	-1.86437	0.00205835	0.0137866	0.0096302	5031	tags=53%, list=24%, signal=40%	FOXA1/TBC1D32/PRKACB/TCTN1/BMP4/TULP3/PTCH1/WDR19/GLI2/GLI3
GOBP	MORPHOGENESIS OF EMBRYONIC EPITHELIUM	140	-0.337221	-1.5264	0.00205542	0.0137807	0.00962606	3524	tags=34%, list=17%, signal=28%	MIB1/IFT172/VEGFC/IFT52/SETD2/PRICKLE1/TCTN1/ABL1/BMP4/WNT7B/IRX2/TFAP2A/LMO4/SOX4/STK3/NOG/DVL2/SOX8/FZD3/JAG2/TWIST1/TULP3/LRP6/ARHGAP35/FGFR2/GREM1/SEC24B/GDF7/NPHP3/ALDH1A2/SKI/WNT2/TGFB1I1/IFT122/SDC4/BMP7/OSR1/PTCH1/TSC1/IRX1/LAMA5/DLC1/GLI2/AR/WNT2B/COBL/GATA3
GOMF	RNA POLYMERASE II CORE PROMOTER SEQUENCE SPECIFIC DNA BINDING	18	0.654926	1.85726	0.00205263	0.0137758	0.00962261	1000	tags=39%, list=5%, signal=37%	STAT1/HDAC1/MACROH2A1/H2AZ1/RUVBL2/EZH2/CEBPB
GOBP	POSITIVE REGULATION OF METAPHASE ANAPHASE TRANSITION OF CELL CYCLE	15	0.680202	1.83984	0.00204559	0.0137423	0.0095992	3150	tags=53%, list=15%, signal=45%	DLGAP5/ANAPC7/CDT1/ESPL1/MAD2L1BP/ANAPC11/RB1/CDC23
GOBP	NEGATIVE REGULATION OF PROTEIN POLYMERIZATION	75	-0.402764	-1.65342	0.00204162	0.0137293	0.00959016	2440	tags=32%, list=12%, signal=28%	SLIT2/KANK4/ADD1/TMOD2/TMSB15B/VILL/DYRK1A/PFN2/CLIP3/SPTAN1/MAP2/SNCA/SCIN/FHOD3/SVIL/EPS8/SPTBN2/MYADM/ADD3/LMOD1/TMOD1/GSN/KANK1/SPTBN1
GOBP	MULTICELLULAR ORGANISM GROWTH	128	-0.341381	-1.52023	0.00202584	0.0136369	0.00952558	3677	tags=32%, list=18%, signal=27%	PIK3CA/SOCS2/SOS1/MBD5/RAI1/PPP1R13L/CLIC4/MFSD2A/APP/GPAM/GNAS/ATRX/FTO/WWTR1/STAT5A/DIO3/ETNK2/EN1/ADD1/WDR48/ADRB1/SELENOM/PLAG1/TNS2/ZFP36L1/GHR/KLF2/ZFX/ADARB1/NPY1R/PTCH1/STAT5B/PLEKHA1/SPTBN2/SLITRK6/BBS2/AR/NOTCH2/BCL2/SOD1/ADRB2
GOBP	REGULATION OF CD4 POSITIVE ALPHA BETA T CELL DIFFERENTIATION	48	0.482819	1.70621	0.00201407	0.0135713	0.00947975	3986	tags=44%, list=19%, signal=35%	ZC3H12A/NFKBIZ/IL4R/CD83/SASH3/JAK3/IFNG/SOCS1/CBFB/IL12B/LGALS9/CCL19/IL23A/CD86/NFKBID/ANXA1/HLA-DRA/IL12RB1/NLRP3/CD80/FOXP3
GOBP	REGULATION OF BONE MINERALIZATION	70	-0.417815	-1.68862	0.00197565	0.0133257	0.00930821	4360	tags=54%, list=21%, signal=43%	ACVR2A/NELL1/KL/BCOR/ECM1/PKDCC/TMEM119/S1PR1/RFLNB/ACVR2B/BMP2/BMP6/ATRAID/BMP4/ADGRV1/TFAP2A/ENPP1/DDR2/ATP2B1/ANO6/TWIST1/OMD/P2RX7/GPM6B/GREM1/MGP/BMPR1A/PTN/MEF2C/SLC8A1/BMPR1B/SMAD3/BMP7/OSR1/NBR1/ANKH/OSR2/ADRB2
GOBP	CELL FATE DETERMINATION	40	-0.504159	-1.82892	0.00197333	0.0133235	0.00930665	3069	tags=32%, list=15%, signal=28%	PRRX1/BMP4/HES1/JAG1/NTF4/EBF2/KLF4/MEF2C/GATA2/PTCH1/CYP26B1/NOTCH2/GATA3
GOCC	RIBONUCLEASE P COMPLEX	13	0.707065	1.83193	0.00197312	0.0133235	0.00930665	4057	tags=69%, list=19%, signal=56%	HSD17B10/TRMT10C/RPP40/POP5/POP4/POP1/POP7/RPP30/RPP38
GOBP	PYRIMIDINE CONTAINING COMPOUND METABOLIC PROCESS	80	0.419484	1.60842	0.0019683	0.0133162	0.00930161	1935	tags=24%, list=9%, signal=22%	TYMP/UPP1/TK1/UCK2/NME1/NT5C3A/CTPS1/TYMS/ENTPD7/CMPK2/ACP3/APOBEC3B/DTYMK/TDG/PUDP/RRM1/UMPS/DCTPP1/SMUG1
GOBP	REGULATION OF CELL CYCLE ARREST	103	0.401713	1.61175	0.00195475	0.0132379	0.00924691	3679	tags=34%, list=18%, signal=28%	CCNB1/CDK1/TFDP1/FOXM1/PCNA/AURKA/PLK2/SFN/E2F8/MIF/CNOT11/CDK5/SLC25A33/CDKN1A/MYBBP1A/CRLF3/PLK3/RRP8/CNOT1/ADAM10/CHEK2/TRIAP1/BRCA1/CDK2/CRADD/CDC25C/PML/BAX/GADD45A/PRMT1/MDM2/CDK9/CNOT6/PPP2R5B/CDK4
GOBP	MODULATION BY SYMBIONT OF ENTRY INTO HOST	46	0.486465	1.69105	0.00195259	0.0132366	0.00924599	4424	tags=52%, list=21%, signal=41%	KRT6A/TRIM14/TMPRSS4/TRIM22/CXCL8/IFITM1/P4HB/TRIM62/TRIM21/FCN1/TRIM10/IFITM3/LGALS9/TRIM5/EXOC2/SNX3/CIITA/TRIM25/IFITM2/TRIM11/NECTIN2/PTX3/LY6E/FCN3
GOBP	NUCLEOBASE CONTAINING SMALL MOLECULE CATABOLIC PROCESS	47	0.491848	1.71947	0.00194953	0.0132292	0.00924082	4881	tags=40%, list=23%, signal=31%	TYMP/UPP1/PNP/NT5C3A/AHCY/NUDT15/ENTPD7/APOBEC3B/HPRT1/NUDT5/XDH/NUDT1/ADA2/DERA/GSK3A/NT5C/APOBEC3C/ENTPD3/ENTPD5
GOBP	DEVELOPMENTAL GROWTH INVOLVED IN MORPHOGENESIS	218	-0.305031	-1.45614	0.00194869	0.0132292	0.00924082	4795	tags=37%, list=23%, signal=29%	KIF26B/SEMA4C/SEMA3C/WNT11/MAPT/DDR1/SHTN1/LRP1/HDAC6/USP9X/SEMA3A/DVL1/MED1/S1PR1/RND2/CTNNB1/RUFY3/SMURF1/PRKN/SEMA6D/NEDD4L/NRP1/TNN/VCL/FGF1/SYT1/APP/ABL1/SIN3A/BMP4/WNT7B/CXCL12/RTN4R/SEMA3E/GOLGA4/YAP1/NKD1/MACF1/L1CAM/SLIT2/SPART/SEMA4G/AUTS2/SEMA6A/FMN1/ESR1/FGF13/SEMA3B/PPP3CB/NDN/RYK/SLIT3/APOE/LRP6/PTPRS/FGFR2/DCLK1/ULK2/LAMB2/FN1/GSK3B/MAP2/SYT17/NTN1/IQGAP1/RTN4/LZTS2/TGFBR2/DPYSL2/N…
GOBP	DENDRITIC CELL MIGRATION	29	0.574913	1.8041	0.00193883	0.0131833	0.00920874	3377	tags=48%, list=16%, signal=41%	CXCR2/CXCR4/C1QBP/CCR7/SLAMF8/LGALS9/CCL19/CCR5/GPR183/DOCK8/EXT1/CCL5/CCR1/CCR2
GOBP	NON RECOMBINATIONAL REPAIR	98	0.404077	1.60417	0.00193452	0.0131673	0.00919755	5699	tags=49%, list=27%, signal=36%	PARP9/H2AX/UBE2N/DTX3L/POLB/AUNIP/PSMD14/SIRT7/PNKP/XRCC6/XRCC5/NSD2/POLQ/MAD2L2/PAXX/RNF168/PRKDC/HMCES/BRCC3/UBE2V2/BABAM2/XRCC4/HMGB2/LIG4/BRCA1/ERCC8/RNF138/ERCC1/RNF8/CYREN/REXO4/RAD50/TFIP11/PARP3/WRAP53/H4C4/H4C9/ZBTB7A/PRPF19/BABAM1/H4C2/NUDT16L1/ERCC6/MLH1/KMT5C/H4C5/RBBP8/TP53BP1
GOBP	TETRAHYDROFOLATE METABOLIC PROCESS	17	0.654553	1.82638	0.00192874	0.0131413	0.0091794	1973	tags=53%, list=9%, signal=48%	GCH1/TYMS/GART/SHMT2/ATIC/MTHFD1/MTHFD2/MTHFD1L/DHFR
GOBP	ANTIGEN PROCESSING AND PRESENTATION OF ENDOGENOUS PEPTIDE ANTIGEN	17	0.654771	1.82699	0.00192874	0.0131413	0.0091794	5675	tags=76%, list=27%, signal=56%	TAP1/TAP2/HLA-E/TAPBP/IDE/HLA-DRA/B2M/HLA-F/HLA-B/HLA-G/HLA-A/HLA-C/ERAP2
GOBP	CHROMOSOME CONDENSATION	46	0.486685	1.69181	0.00192366	0.0131333	0.00917382	1573	tags=22%, list=8%, signal=20%	CCNB1/NUSAP1/CDCA5/NCAPH/NCAPG/TOP2A/AIFM1/NCAPG2/SMC2/SMC4
GOBP	REGULATION OF DNA REPAIR	126	0.382457	1.5806	0.00192056	0.0131255	0.00916834	3696	tags=34%, list=18%, signal=28%	PARP9/H2AX/UBE2N/FOXM1/TIGAR/TIMELESS/PCNA/DTX3L/TRIP12/RAD51/PPP4C/PARPBP/OTUB2/PPP4R2/AUNIP/RAD51AP1/SIRT7/PNKP/FIGNL1/CGAS/NSD2/POLQ/MAD2L2/RNF168/PRKDC/BRCC3/UBE2V2/BABAM2/BRCA1/TMEM161A/ERCC8/PML/SIRT6/PARP1/RNF8/UBQLN4/CDK9/CYREN/KDM1A/RMI2/WAS/OTUB1/TFIP11
GOBP	NEGATIVE REGULATION OF ACTIVATED T CELL PROLIFERATION	14	0.693069	1.83114	0.00191808	0.0131219	0.00916584	3986	tags=57%, list=19%, signal=46%	CD274/ARG1/LGALS9/LILRB4/CRTAM/SCRIB/CASP3/FOXP3
GOBP	POSITIVE REGULATION OF EPIDERMIS DEVELOPMENT	30	0.565392	1.78384	0.0019175	0.0131219	0.00916584	2653	tags=47%, list=13%, signal=41%	PPARD/MACROH2A1/PRKCH/TMEM79/TRIM16/ZBED2/IL20/SFN/CYP27B1/SULT2B1/OVOL2/ETV4/MACROH2A2/PLAAT4
GOBP	POSITIVE REGULATION OF EPIDERMAL CELL DIFFERENTIATION	25	0.595656	1.79439	0.00191676	0.0131219	0.00916584	2653	tags=48%, list=13%, signal=42%	MACROH2A1/PRKCH/TRIM16/ZBED2/IL20/SFN/CYP27B1/SULT2B1/OVOL2/ETV4/MACROH2A2/PLAAT4
GOMF	U3 SNORNA BINDING	10	0.752055	1.81615	0.00191468	0.0131219	0.00916584	2998	tags=70%, list=14%, signal=60%	ISG20/TSR1/SNU13/XRCC5/RRP9/PRKDC/TBL3
GOBP	REGULATION OF CARDIAC MUSCLE CELL PROLIFERATION	37	-0.513224	-1.82628	0.00190302	0.0130721	0.00913107	4035	tags=51%, list=19%, signal=41%	KCNK2/SAV1/PTEN/VGLL4/ERBB4/JARID2/YAP1/NOG/FGFR2/BMPR1A/MEF2C/RBP4/WNT2/RBPJ/MAPK1/TGFBR2/ZFPM2/MEIS1/TGFBR3
GOBP	POSITIVE REGULATION OF VIRAL PROCESS	89	0.412186	1.60901	0.00189603	0.0130374	0.00910685	4419	tags=42%, list=21%, signal=33%	KPNA2/TMPRSS4/POLR2H/PPIA/POLR2F/TOP2A/VAPA/IFIT1/TARBP2/NELFCD/PPIH/P4HB/TRIM21/PDE12/POLR2L/LGALS9/ADAR/SRPK1/POLR2G/POLR2D/LARP1/POLR2E/CCL5/VPS37B/CLEC4G/NELFE/CDK9/POLR2I/PC/TRIM11/SUPT4H1/TMEM39B/CHMP2A/FKBP6/POLR2J/TMEM250/CD28
GOCC	U2 TYPE SPLICEOSOMAL COMPLEX	91	0.414199	1.61759	0.00189603	0.0130374	0.00910685	2861	tags=32%, list=14%, signal=28%	EIF4A3/PPIL1/SNRPG/SNRPF/SNRPD1/LSM2/BUD31/TXNL4A/SF3B3/LSM7/SNRPD3/EFTUD2/SF3B5/SNU13/SNRPA1/MAGOHB/SNRPC/SF3B6/LSM5/LSM4/SNRPB/AQR/LUC7L2/PRPF31/PRPF38A/LSM6/ISY1/PRPF4/PLRG1
GOMF	PROTEIN FOLDING CHAPERONE	33	0.556914	1.81043	0.00189505	0.0130374	0.00910685	2945	tags=36%, list=14%, signal=31%	CCT5/HSPA5/CCT2/CCT3/HSPA14/HSPA9/CCT7/HSPA8/DNAJB1/TCP1/CCT6A/CCT8
GOBP	T CELL MEDIATED CYTOTOXICITY	43	0.510932	1.7527	0.0018776	0.0129504	0.00904608	4624	tags=60%, list=22%, signal=47%	CTSC/RAB27A/CYRIB/HPRT1/PRF1/IL12B/IL7R/RIPK3/IL23A/FADD/HLA-E/XCL1/KLRD1/CD1B/HLA-DRA/IL12RB1/B2M/HLA-F/HLA-B/LILRB1/NECTIN2/HLA-G/EMP2/CD1D/PTPRC/AGER
GOBP	DNA UNWINDING INVOLVED IN DNA REPLICATION	16	0.680842	1.88532	0.00187472	0.0129438	0.00904148	4208	tags=69%, list=20%, signal=55%	MCM6/RAD51/MCM4/MCM2/SSBP1/MCM7/BLM/TWNK/HMGA1/RECQL4/RPA1
GOBP	VESICLE LOCALIZATION	216	0.341966	1.50151	0.00185723	0.0128363	0.00896634	4463	tags=34%, list=21%, signal=27%	CDH3/CTSC/MREG/SERPINA1/MX1/TGFA/RAB11A/RAB27A/SHROOM2/AREG/MKKS/BORCS5/TFG/MYO1E/BLOC1S2/FBXW11/AP3D1/SNAP29/MX2/CNIH1/RAB1A/CDK5/BICDL2/TRAPPC2L/YKT6/GPR143/AP1M2/MYO5A/PDCD6/LIMK2/MYO1F/TRAPPC5/ITGA4/MYO1B/NDE1/AP3B1/PREB/NSF/SEC24C/TOR1A/PPP6R1/IKBKG/PPP6C/NAPA/WASL/SEC13/VAMP7/VPS33B/SNAPIN/NDEL1/MYO1H/MYO5B/BLOC1S4/KIF1B/WIPI1/CEP19/LMAN1/MYO19/PPP6R3/HTT/SCFD1/TMED9/TRAPPC1/DCTN2/KIFAP3/TR…
GOMF	OXIDOREDUCTASE ACTIVITY ACTING ON THE CH NH GROUP OF DONORS	27	0.587985	1.82707	0.00185514	0.0128351	0.00896549	5197	tags=67%, list=25%, signal=50%	AASS/IL4I1/SMOX/MTHFD1/MTHFD2/ALDH4A1/MTHFD1L/DHFR/PAOX/MTHFR/PIPOX/ETFDH/PYCR1/SARDH/MTHFD2L/DMGDH/PYCR3/BLVRB
GOBP	REGULATION OF RESPONSE TO DNA DAMAGE STIMULUS	213	0.338885	1.48712	0.00185001	0.0128128	0.00894992	3696	tags=31%, list=18%, signal=26%	PARP9/H2AX/UBE2N/FOXM1/TIGAR/TIMELESS/PCNA/DTX3L/TRIP12/SMYD2/RAD51/PPP4C/PARPBP/DDIAS/ZMPSTE24/OTUB2/PPP4R2/AUNIP/RAD51AP1/EEF1E1/MIF/MYC/SIRT7/PNKP/FIGNL1/CGAS/BID/BCL2L12/NSD2/POLQ/MAD2L2/RNF168/FBXO5/PRKDC/WDR76/CHEK2/BRCC3/UBE2V2/BABAM2/TRIAP1/THOC5/BRCA1/FBXO4/TMEM161A/ERCC8/PML/ARMT1/ING2/ERCC1/SIRT6/PARP1/MDM2/RNF8/UBQLN4/RFWD3/PSMD10/CDK9/PRKCD/CYREN/KDM1A/MCL1/RMI2/WAS/OTUB1/CDKN2D/TFIP…
GOBP	POSITIVE REGULATION OF ANION TRANSMEMBRANE TRANSPORT	59	-0.431709	-1.68146	0.00184652	0.0128018	0.00894225	4280	tags=42%, list=21%, signal=34%	CFTR/ABCB1/APPL1/C2CD5/RAP1A/ACSL1/C3/TCAF1/CLTRN/INSR/ADIPOQ/RHOQ/CLIP3/ITGB1/GPC3/OSBPL8/BRAF/KLF15/IRS1/PIK3R1/AZIN1/CREBL2/SORBS1/IRS2/MEF2A
GOCC	NUCLEAR REPLICATION FORK	34	0.538385	1.76742	0.00184572	0.0128018	0.00894225	4287	tags=47%, list=21%, signal=37%	TIMELESS/PCNA/MCM10/RPA3/POLD2/MCM3/WDHD1/POLA2/PRIM1/PLRG1/POLD4/SMARCA5/POLD3/RPA1/TIPIN/POLD1
GOBP	POSITIVE REGULATION OF PROTEIN MODIFICATION BY SMALL PROTEIN CONJUGATION OR REMOVAL	132	0.372837	1.54549	0.00182931	0.0127087	0.00887723	3843	tags=34%, list=18%, signal=28%	ZC3H12A/CDC20/NMI/NOD2/DCUN1D5/UBE2C/UBE2N/VCP/FANCI/UBE2L3/HSPA5/CENPX/GNL3/TBC1D7/UBE2S/TOLLIP/CHFR/AIMP2/RAB1A/UBE2D1/RBX1/PLK1/BIRC3/CENPS/PDCD6/PHF23/COMMD1/PTPN22/SAE1/HSPBP1/LAPTM5/TNIP1/BRCA1/FBXO4/PSMD10/PELI1/CDK9/ARRB1/BCL10/CTR9/KDM1A/DCUN1D3/HDAC3/GSK3A/SPHK1
GOBP	CD8 POSITIVE ALPHA BETA T CELL ACTIVATION	25	0.600188	1.80804	0.00182012	0.0126579	0.00884178	3674	tags=52%, list=18%, signal=43%	CD274/IRF1/SOCS1/CBFB/PTPN22/WDFY4/LILRB4/HLA-E/CRTAM/CLEC4A/EOMES/XCL1/LILRB1
GOBP	LIPOPOLYSACCHARIDE MEDIATED SIGNALING PATHWAY	56	0.475991	1.72902	0.00181129	0.0126096	0.008808	4807	tags=46%, list=23%, signal=36%	LTF/MYD88/PTAFR/IRAK2/IRAK1/TLR2/IL1B/CCL2/LYN/CD6/HCK/CD36/PTPN22/CARD16/TRIM5/LY96/CCL5/TNF/BCL10/LY86/LILRA2/MAPK14/MALT1/TRIB1/MAPK3/TICAM1
GOBP	NEGATIVE REGULATION OF LYMPHOCYTE MEDIATED IMMUNITY	44	0.512816	1.77174	0.00179387	0.0125013	0.00873236	5251	tags=59%, list=25%, signal=44%	SERPINB4/NOD2/SUSD4/ARG1/SERPINB9/IL7R/LGALS9/LILRB4/HLA-E/XCL1/KLRD1/CLEC4G/CD96/HLA-F/HLA-B/LILRB1/HLA-G/FOXP3/PARP3/CR1/PTPRC/TBX21/ARRB2/IFNA2/HLA-A/C4BPA
GOBP	T CELL CHEMOTAXIS	23	0.612243	1.81716	0.00177242	0.0123646	0.00863685	3616	tags=65%, list=17%, signal=54%	WNT5A/S100A7/CXCL13/CXCL16/CXCL10/ADAM17/GPR183/OXSR1/ADAM10/CXCL11/PIK3CD/CCL5/XCL1/CCR2/TMEM102
GOBP	CELLULAR TRANSITION METAL ION HOMEOSTASIS	109	0.399822	1.61765	0.00176863	0.012351	0.00862737	2252	tags=24%, list=11%, signal=21%	LCN2/S100A9/LTF/S100A8/ATOX1/HMOX2/GLRX3/SCO2/SLC39A6/ATP6V0D1/HIF1A/ATP6V1G1/LCK/ABCB6/AP3D1/NUBP1/IFNG/SCO1/MYC/HMOX1/SLC31A1/SLC39A4/AP3B1/TFRC/CUL1/ATP6V1A
GOBP	UREA CYCLE	11	0.740093	1.83666	0.00176186	0.0123165	0.00860326	1618	tags=45%, list=8%, signal=42%	NMRAL1/ARG1/ASL/SLC25A15/NAGS
GOBP	CELLULAR MODIFIED AMINO ACID BIOSYNTHETIC PROCESS	43	0.511323	1.75404	0.00176116	0.0123165	0.00860326	3574	tags=47%, list=17%, signal=39%	SLC7A11/GCH1/ALDH7A1/CHAC1/CHAC2/PLSCR1/CNDP2/GART/ATIC/MTHFD1/GGCT/GCLM/MTHFD1L/DHFR/PARK7/MGST2/PTDSS2/GCLC/PLOD2/OPLAH
GOBP	MULTI ORGANISM LOCALIZATION	65	0.460423	1.7112	0.00176096	0.0123165	0.00860326	4816	tags=49%, list=23%, signal=38%	RAN/KPNA2/DYNLT1/NUP37/CTSL/NUP210/TRIM15/IFIT1/NUP88/NUP50/VPS37A/RAE1/SEC13/KPNB1/BST2/NUP155/VPS37B/NDC1/UBAP1/NUP188/NUP85/KPNA3/NUP205/MVB12A/NUP58/NUP107/NUP93/POM121/NUP160/CLEC4M/NUP35/NUP42
GOMF	TRNA SPECIFIC RIBONUCLEASE ACTIVITY	14	0.694892	1.83596	0.00175415	0.012301	0.00859245	4342	tags=71%, list=21%, signal=57%	ELAC2/RPP40/POP5/POP4/TSEN34/POP1/POP7/RPP30/RPP38/TSEN2
GOBP	NUCLEOSIDE CATABOLIC PROCESS	32	0.536824	1.73299	0.00174683	0.0122625	0.00856554	1345	tags=25%, list=6%, signal=23%	TYMP/UPP1/PNP/NT5C3A/AHCY/APOBEC3B/HPRT1/XDH
GOBP	IMPORT INTO NUCLEUS	151	0.37036	1.56097	0.00174555	0.0122625	0.00856554	4021	tags=36%, list=19%, signal=30%	ZC3H12A/RAN/KPNA2/SNRPG/MMP12/SNRPF/FERMT1/SNRPD1/ZPR1/HEATR3/ECT2/STAT3/IPO4/SNRPD3/NUP88/IFNG/NUP62CL/BAG3/GEMIN6/GEMIN7/CDKN1A/SYK/NOLC1/NUP50/CD36/HTATIP2/HIKESHI/SNRPB/NXT1/E2F3/CSE1L/ELAVL1/SEC13/TARDBP/KPNB1/PIK3R2/HCLS1/NUP155/PML/GEMIN2/PKIA/NUP188/PHB2/PRKCD/PRKAG1/NUP85/KPNA3/NUTF2/HDAC3/NUP58/CDH1/JUP/NUP107/MAPK14/NUP93
GOBP	NEGATIVE REGULATION OF TRANSFORMING GROWTH FACTOR BETA RECEPTOR SIGNALING PATHWAY	79	-0.391081	-1.61581	0.00173413	0.0121989	0.0085211	5707	tags=47%, list=27%, signal=34%	PBLD/SMAD2/CIDEA/FBN1/NRROS/STUB1/BAMBI/LEMD3/RASL11B/PEG10/PDPK1/HTRA1/UBC/SMURF1/LDLRAD4/SLC2A10/HTRA4/SIRT1/SPRED2/GLG1/CD109/SPRED1/SNX25/SMURF2/PMEPA1/PPARA/SKI/SMAD3/TGFB1I1/TGFBR2/ASPN/IL17RD/SPRY1/SPRY2/CAV2/CAV1/TGFBR3
GOBP	NEGATIVE REGULATION OF INTERLEUKIN 1 BETA PRODUCTION	26	0.599233	1.83605	0.00170792	0.0120271	0.00840109	3769	tags=46%, list=18%, signal=38%	ZC3H12A/SERPINB1/GSTP1/CARD16/LILRB4/TREM2/PML/CPTP/NLRP7/CARD18/ERRFI1/NLRP3
GOBP	REGULATION OF ALPHA BETA T CELL DIFFERENTIATION	64	0.454485	1.68457	0.00169941	0.0119797	0.00836801	4101	tags=45%, list=20%, signal=37%	ZC3H12A/NFKBIZ/PNP/IL4R/CD83/PRDM1/SASH3/AP3D1/JAK3/IFNG/SOCS1/CBFB/IL12B/SYK/LGALS9/CCL19/AP3B1/IL23A/LILRB4/CD86/NFKBID/ANXA1/HLA-DRA/IL12RB1/ZAP70/NLRP3/CD80/FOXP3/ZNF683
GOCC	CAJAL BODY	55	0.472661	1.71428	0.00169457	0.0119581	0.00835295	2845	tags=38%, list=14%, signal=33%	ISG20/NHP2/HNRNPA2B1/ZPR1/TRIM22/NOP10/OIP5/EFTUD2/LSM10/NOP58/SNRPC/ZC3H8/NOLC1/FAM118B/GAR1/PRPF31/ELL/EAF1/DKC1/PRPF4/CDK2
GOBP	REGULATION OF TRANS SYNAPTIC SIGNALING	393	-0.257675	-1.31608	0.00169146	0.0119487	0.00834638	3924	tags=25%, list=19%, signal=20%	RASGRF2/EGR2/RAP1B/ZDHHC3/LRRC4C/GPER1/SQSTM1/PRKN/GRIN3A/VAMP2/PTEN/SHANK2/LAMA2/PRKCE/RAP1A/SLC24A1/SLC12A2/RELN/TAC1/ZDHHC2/SYT1/TSHZ3/IGSF11/PXK/APP/ABL1/PREPL/LGI1/PACSIN2/CBLN1/PRRT2/NRG3/STXBP5/FAM107A/LRRK2/NPTN/EDN1/ADIPOQ/PLCB1/SNCG/RAB26/NTF4/CLSTN1/NLGN1/SNCAIP/CACNB2/PNKD/EGFR/CNTN4/BCHE/NPTX1/PRKAR2B/SHANK3/PPP3CB/NPY5R/RHOT1/APOE/RNF19A/PLCL2/PTPRS/NTF3/MECP2/AKAP12/ITGB1/NTRK2/NIS…
GOBP	DNA DAMAGE RESPONSE SIGNAL TRANSDUCTION BY P53 CLASS MEDIATOR	105	0.398816	1.60131	0.00168637	0.0119253	0.00833002	3325	tags=34%, list=16%, signal=29%	CCNB1/CDK1/TFDP1/FOXM1/PCNA/AURKA/SMYD2/PLK2/BCL3/SFN/E2F8/ZMPSTE24/EEF1E1/MIF/CNOT11/CDKN1A/PLK3/SESN2/BRCA2/BATF/CNOT1/CHEK2/TRIAP1/HIPK2/BRCA1/CDK2/CRADD/CDC25C/PML/BAX/GADD45A/PRMT1/MDM2/SP100/PSMD10/CNOT6
GOBP	REGULATION OF GTPASE ACTIVITY	447	-0.251788	-1.30171	0.00168477	0.0119253	0.00833002	3631	tags=28%, list=17%, signal=24%	ALS2/SOS1/ALDH1A1/RDX/NRP1/PLXND1/RAP1A/IQSEC1/RABEP1/TIAM2/ASAP3/TBC1D8/AGAP9/CBLB/SRGAP3/ANKRD27/CPEB2/RASA4/AGAP4/BCAS3/ARHGEF1/STXBP5/TBC1D2B/BVES/LARS1/ARHGAP24/RTN4R/LRRK2/ARHGAP10/RASA3/RGS2/EFNA5/NET1/HACD3/AMOT/NGEF/S100A10/SYDE1/SLIT2/CHML/WNK1/PLCB1/DVL2/IPO5/F2R/ARHGEF15/EVI5/DOCK5/DOCK4/TBC1D15/FZD10/RAPGEF3/MET/ARHGAP20/NEDD9/ADRB1/RANBP3/ARHGEF6/ARHGAP26/RALGAPB/AGFG2/GIT2/ARHGAP12…
GOBP	PROSTATE GLAND GROWTH	10	-0.749107	-1.87617	0.00168115	0.0119135	0.00832176	4499	tags=80%, list=22%, signal=63%	PSAP/UBE3A/PTEN/ESR1/PLAG1/FGFR2/PSAPL1/AR
GOCC	SAM COMPLEX	13	0.712107	1.84499	0.00167961	0.0119135	0.00832176	4058	tags=77%, list=19%, signal=62%	MTX2/HSPA9/MICOS10/MICOS13/MTX1/CHCHD3/IMMT/APOO/DNAJC11/SAMM50
GOBP	REGULATION OF LYMPHOCYTE MIGRATION	59	0.45932	1.67776	0.00166609	0.0118317	0.00826465	3616	tags=41%, list=17%, signal=34%	C10orf99/WNT5A/CCL20/S100A7/PYCARD/CXCL13/CXCL10/CCL4/ADAM17/CCL2/ITGA4/RIPK3/CCL7/DOCK8/OXSR1/ADAM10/ADAM8/FADD/WASL/CCL5/XCL1/CCR2/GCSAM/TMEM102
GOBP	TRANSITION METAL ION TRANSPORT	121	0.383685	1.5789	0.00166186	0.0118141	0.00825236	3017	tags=26%, list=14%, signal=22%	TCN1/LCN2/TMEM165/LTF/ATOX1/SLC39A6/FLVCR2/ATP6V0D1/ATP6V1B2/ATP6V1G1/ATP6V0B/SLC25A28/ABCB6/ATP6V1F/IFNG/ATP13A1/SLC39A2/ATP6V1D/SLC31A1/ATP6V1C1/STEAP4/SLC39A4/ATP6V1C2/TMEM163/TFRC/ATP6V1H/ATP6V1A/COX17/ATP6V0E1/STEAP3/SLC39A11
GOBP	REGULATION OF MORPHOGENESIS OF A BRANCHING STRUCTURE	48	-0.46547	-1.74927	0.00165641	0.0117879	0.00823405	3622	tags=42%, list=17%, signal=35%	TACSTD2/LGR4/ABL1/BMP4/AGT/LRRK2/NTN4/BTBD7/SHOX2/NOG/SOX8/ESR1/PDGFA/FGFR2/GREM1/WNT2/RTN4/BMP7/AR/WNT2B
GOBP	POSITIVE REGULATION OF CELL CYCLE ARREST	78	0.426192	1.62395	0.00165586	0.0117879	0.00823405	3325	tags=35%, list=16%, signal=29%	CCNB1/CDK1/TFDP1/PCNA/AURKA/PLK2/SFN/E2F8/CNOT11/CDKN1A/MYBBP1A/CRLF3/PLK3/RRP8/CNOT1/CHEK2/TRIAP1/BRCA1/CDK2/CRADD/CDC25C/PML/BAX/GADD45A/PRMT1/MDM2/CNOT6
GOBP	VASCULAR ASSOCIATED SMOOTH MUSCLE CELL MIGRATION	20	-0.625656	-1.89924	0.001652	0.0117814	0.00822952	2420	tags=75%, list=12%, signal=66%	PAK1/ATP7A/PDGFB/LRP1/ADIPOQ/DOCK5/DOCK4/FGF9/DOCK7/MEF2C/IGFBP5/MYOCD/IQGAP1/PRKG1/TPM1
GOMF	ORGANIC ANION TRANSMEMBRANE TRANSPORTER ACTIVITY	168	0.365589	1.561	0.00164802	0.0117656	0.00821843	5370	tags=37%, list=26%, signal=28%	SLC6A14/SLC26A9/SLC25A5/SLC7A1/SLC7A11/SFXN1/ABCC1/SLC35B1/SLC16A1/SLC23A2/SLC7A5/SLC25A13/SLC25A15/SLC5A6/SLC2A1/SLC38A5/SLC25A10/SLC36A1/SLC25A25/SFXN2/SLCO4A1/SLC3A2/CD36/SLC4A11/SLC52A2/CTNS/SLC25A11/SLC9A3R1/SLC1A3/SLC26A4/SLC25A19/SLC19A1/SLC16A3/SFXN5/SLC38A9/MFSD10/SLC66A1/SLC38A7/SLC35B4/SLC6A20/SLC35D2/SLC23A1/SLC36A4/SLC6A1/SLC25A32/GJA1/SLC1A1/SLC1A5/SLC1A4/SLC25A12/ABCC5/SLC6A11/SLCO…
GOBP	STRIATED MUSCLE CELL PROLIFERATION	60	-0.432209	-1.68028	0.00164455	0.0117533	0.00820988	4040	tags=45%, list=19%, signal=36%	TGFB2/KCNK2/ANGPT1/MSTN/SIX5/SAV1/PTEN/FOXC2/VGLL4/ERBB4/JARID2/YAP1/NOG/FOXC1/FGFR2/BMPR1A/DIPK2A/MEF2C/RBP4/WNT2/RBPJ/MAPK1/TGFBR2/ZFPM2/EPHB1/MEIS1/TGFBR3
GOBP	REGULATION OF ATTACHMENT OF SPINDLE MICROTUBULES TO KINETOCHORE	13	0.713967	1.84981	0.00163077	0.0116672	0.00814973	1894	tags=54%, list=9%, signal=49%	CCNB1/AURKB/NEK2/SPAG5/ECT2/RACGAP1/RCC2
GOBP	TRANSLATIONAL INITIATION	180	-0.314832	-1.47649	0.00162792	0.0116592	0.00814416	3736	tags=37%, list=18%, signal=30%	RPL24/RPS11/RPS5/RPS9/MIF4GD/RPL41/RPL23A/RPS25/RPS15A/MTIF3/RPS15/CSDE1/RBM4/TPR/RPL13A/RPL32/EIF1B/RPL7A/RPS27/RPL31/RPL18/EIF2A/RPL27/RPS8/RPL4/RPL12/RPL9/METTL3/RPS6/RPL13/RPL10A/RPL11/RPL37/RPL14/RPS4X/HABP4/RPLP2/RPS14/RPLP1/RPL8/RPS17/EIF4B/RPS24/RPL22/RPS23/EIF4EBP2/EIF3E/EIF3H/RPL23/EIF4A2/RPL38/CTIF/RPS20/RPL3/RPL15/RPL34/RPS3A/EIF4E3/RPL5/EIF3L/RPL10/RPL7/RPL35A/RPL30/C8orf88/PAIP2B
GOBP	DENDRITE MORPHOGENESIS	137	-0.348577	-1.57772	0.00162047	0.0116183	0.00811557	5062	tags=42%, list=24%, signal=32%	SLITRK5/EPHB3/OPA1/DHX36/LZTS3/CUX2/HDAC6/SEMA3A/DVL1/ARHGAP44/TRPC6/OBSL1/TNIK/PHACTR1/PREX2/SS18L1/UBE3A/PTEN/NEDD4L/NRP1/SHANK2/RELN/ANKRD27/SARM1/HECW2/LRRK2/PDLIM5/ZNF365/NGEF/BHLHB9/NLGN1/MAP6/EFNA1/FARP1/ZDHHC15/DIP2A/SHANK3/TMEM106B/DCLK1/CAPRIN2/TRAK2/GSK3B/PTN/MAP2/RBFOX2/ABI2/KIDINS220/RERE/RAPGEF2/PAK3/EPHB1/FYN/SDC2/DBN1/LRP4/FBXO31/MEF2A/EEF2K
GOCC	DNA PACKAGING COMPLEX	87	0.415619	1.61415	0.00161761	0.0116102	0.00810989	7180	tags=59%, list=34%, signal=39%	H2AX/NCAPH/NCAPG/MACROH2A1/H2AZ1/CENPA/NCAPG2/H2AJ/SMC2/SMC4/H2BC9/MACROH2A2/H3C10/NCAPD2/H2AC4/H2AC13/H2BC10/SLF1/H1-2/H3C7/H2BC12/H3C8/H4C4/H2AC16/H4C9/H2BC13/H1-5/H2BC6/H4C2/GLYR1/H1-3/H4C5/H1-1/KDM1B/IRF4/H2BC7/PRM3/H2BC14/H3C2/H1-9P/H4C1/H1-4/H1-6/H3C11/H2BC17/PRM2/H3C1/H2BW2/H3C3/H3C12/TNP1
GOBP	T CELL APOPTOTIC PROCESS	48	0.48974	1.73067	0.00161412	0.0115975	0.00810105	3351	tags=46%, list=16%, signal=39%	CD274/WNT5A/PRELID1/PRKCQ/BAK1/HIF1A/IDO1/JAK3/ZC3H8/IL7R/RIPK3/LGALS9/CD27/DOCK8/IL2RA/ADAM8/FADD/CCL5/DNAJA3/FASLG/BAX/BCL10
GOBP	NUCLEOSIDE PHOSPHATE CATABOLIC PROCESS	79	0.424443	1.62336	0.00160293	0.0115294	0.00805348	1988	tags=28%, list=10%, signal=25%	GDA/TYMP/UPP1/PNP/ACOT7/NUDT15/VCP/ENTPD7/TDG/NT5C2/HPRT1/AMPD3/ITPA/CNP/NUDT5/XDH/DNPH1/GPX1/PDE8A/DCTPP1/SMUG1/NUDT1
GOMF	AMIDE TRANSMEMBRANE TRANSPORTER ACTIVITY	51	0.48474	1.73649	0.00159925	0.0115153	0.0080436	4456	tags=47%, list=21%, signal=37%	ABCC1/TOMM22/SEC61G/TIMM17A/TAP1/TIMM23/TOMM40L/TAP2/TOMM40/SLC5A6/SLC38A5/SLC15A1/SEC61A1/AQP3/TAPBP/SLC19A1/SLC38A7/SLC15A3/TIMM17B/MCL1/SLC25A32/GJA1/ABCC5/SEC61A2
GOBP	RETINA DEVELOPMENT IN CAMERA TYPE EYE	143	-0.341289	-1.5477	0.00158853	0.0114504	0.00799828	5282	tags=38%, list=25%, signal=28%	DLL1/HIPK1/TOPORS/NPHP1/MDM1/FJX1/OPA1/TBC1D32/MED1/LRP5L/OBSL1/TGFB2/SERPINF1/LRP5/ACVR2B/PDE6A/RPL24/NRP1/CYP1B1/RAB11FIP4/NECTIN3/NPHP4/CLIC4/MFSD2A/RORB/PDGFRB/TFAP2A/MERTK/AHI1/GNB1/SLC17A7/PTPRM/DIO3/ATP2B1/SOX8/ARHGEF15/MAX/ACVRL1/TUB/LRP6/NTRK2/LAMB2/PTN/RBP4/RHOJ/ZHX2/SKI/BMPR1B/LAMC3/ATP2B4/TFAP2B/FZD4/PDGFRA/CDON
GOBP	PURINE CONTAINING COMPOUND SALVAGE	15	0.686226	1.85613	0.00158771	0.0114504	0.00799828	1633	tags=33%, list=8%, signal=31%	PNP/APRT/HPRT1/AMPD3/ADK
GOBP	PTERIDINE CONTAINING COMPOUND BIOSYNTHETIC PROCESS	13	0.714912	1.85226	0.00158209	0.0114285	0.00798297	1973	tags=54%, list=9%, signal=49%	GCH1/PTS/GART/ATIC/MTHFD1/MTHFD1L/DHFR
GOBP	CARBOHYDRATE CATABOLIC PROCESS	190	0.35366	1.52794	0.00157979	0.0114241	0.00797995	4470	tags=36%, list=21%, signal=29%	GM2A/ENO1/TPI1/PGAM1/PGK1/PGM2/HK2/TIGAR/GALE/GK/PYGL/PGD/FUT2/HIF1A/EIF6/NUP37/NUP210/LDHA/ALDOA/FOXK2/NUP88/IFNG/FUT1/GAPDH/PPP1CA/NUDT5/GPI/PHKA1/NAGA/AOAH/GALK1/NUP50/RAE1/DHTKD1/RBKS/SEC13/PFKFB2/PFKP/NUP155/GLYCTK/NEU2/PKM/NDC1/PFKFB4/ADPGK/NUP188/PRKAG1/DERA/NUP85/NUP205/G6PC1/OGDHL/ENO3/GSK3A/PHKG2/PPP1R3D/PGK2/NUP58/NUP107/MAN2B1/NUP93/NEU1/POM121/ENOSF1/GK2/HK3/SLC25A12/NUP160/CHIA
GOBP	EPITHELIAL CELL DIFFERENTIATION INVOLVED IN KIDNEY DEVELOPMENT	48	-0.467661	-1.75751	0.00157937	0.0114241	0.00797995	3069	tags=44%, list=15%, signal=37%	BMP4/JAG1/ASXL1/WWTR1/YAP1/ADIPOQ/LIF/MTSS1/PODXL/GREM1/LAMB2/MEF2C/IQGAP1/PTPRO/CD34/ACTA2/OSR1/KLF15/MAGI2/NOTCH2/GATA3
GOBP	EXTRACELLULAR MATRIX ASSEMBLY	44	-0.481041	-1.76929	0.00156621	0.0113504	0.00792843	4774	tags=55%, list=23%, signal=42%	NTNG2/COL1A2/ATP7A/PLOD3/PHLDB2/RAMP2/EFEMP2/AGT/RGCC/LOX/NTN4/MFAP4/CLASP1/ANTXR1/GPM6B/GAS6/TNXB/LAMB2/PHLDB1/FBLN5/DAG1/SMAD3/MYH11/LAMB4
GOBP	POSITIVE REGULATION OF CELL ADHESION	411	0.298992	1.38913	0.00156256	0.0113362	0.00791849	4733	tags=36%, list=23%, signal=28%	CD24/CD274/NFKBIZ/WNT5A/NOD2/PNP/SLC7A1/C1QBP/IL4R/FUT3/PRKCQ/PYCARD/CCR7/CXCL13/PTAFR/GFUS/CD83/PRSS2/FERMT1/VNN1/LCK/IRAK1/CYRIB/SASH3/RHOH/AP3D1/JAK3/IFNG/FUT1/SPOCK2/IL1B/CCL2/ICOS/P4HB/LYN/CSK/CD6/CORO1A/SOCS1/CBFB/IL12B/EPHA1/HSPH1/SYK/SELE/ARPC2/IL7R/NR4A3/IL6/ITGA4/CD36/LGALS9/CCL19/CD27/RELL2/ITGB2/AP3B1/PTPN22/CIB1/IL23A/BTLA/ADAM19/CD5/DOCK8/PLAUR/RSU1/IL2RA/TFRC/HLA-DMB/FLOT2/ADAM8/FA…
GOBP	NEGATIVE REGULATION OF INTERLEUKIN 10 PRODUCTION	19	0.655154	1.88176	0.00156167	0.0113362	0.00791849	4624	tags=63%, list=22%, signal=49%	CD274/TNFRSF21/IDO1/TRIB2/JAK3/IL12B/IL23A/LILRB4/TYROBP/LILRB1/FOXP3/AGER
GOBP	GLUCOSE CATABOLIC PROCESS	35	0.535689	1.77403	0.00155782	0.0113262	0.00791154	4360	tags=49%, list=21%, signal=38%	ENO1/TPI1/PGAM1/PGK1/HK2/TIGAR/ALDOA/FOXK2/GAPDH/GPI/PFKFB2/PFKP/PKM/ADPGK/ENO3/HK3/SLC25A12
GOBP	REGULATION OF NATURAL KILLER CELL MEDIATED IMMUNITY	43	0.516045	1.77024	0.0015574	0.0113262	0.00791154	3933	tags=47%, list=19%, signal=38%	SERPINB4/RAET1E/IL12B/SERPINB9/RASGRP1/IL18RAP/LGALS9/SH2D1A/LAG3/HLA-E/NCR3/CRTAM/KLRD1/CD96/HLA-F/HLA-B/LILRB1/NECTIN2/HLA-G/VAV1
GOBP	REGULATION OF MITOCHONDRIAL MEMBRANE PERMEABILITY	69	0.446239	1.6671	0.00154739	0.0112748	0.00787564	3775	tags=38%, list=18%, signal=31%	TFDP1/PPIF/SLC25A5/GZMB/HK2/BAK1/NMT1/DYNLT1/YWHAQ/SFN/BLOC1S2/VDAC2/CNP/BID/CASP8/BNIP3/TMEM14A/BOK/TP63/ALKBH7/YWHAZ/BAX/HIP1R/TMEM102/MAPK8/GSK3A
GOBP	ENDOTHELIUM DEVELOPMENT	125	-0.353961	-1.56823	0.0015473	0.0112748	0.00787564	5512	tags=49%, list=26%, signal=36%	SOX18/HEG1/RHOA/COL18A1/PDE4D/DLL1/S1PR3/SMAD4/CDH5/FASN/PLOD3/HEY1/TMEM100/BTG1/S1PR1/KDR/CTNNB1/ACVR2B/BMP6/RAP1B/PRKD2/GSTM3/FOXC2/RDX/FSTL1/NRP1/RAP1A/VCL/FGF1/CLIC4/BMP4/WNT7B/CLDN3/HOXB5/JAG1/PECAM1/PLCB1/RAPGEF3/ADD1/MET/ROBO4/CLDN5/ACVRL1/PTPRS/RHOB/TNMD/NR2F2/PTN/ZEB1/STARD13/ROCK2/PDE2A/CD34/RBPJ/ATOH8/RAPGEF2/MYADM/FOXJ2/VEZF1/ARHGEF26/CLDN1
GOCC	PROTON TRANSPORTING TWO SECTOR ATPASE COMPLEX CATALYTIC DOMAIN	17	0.660438	1.8428	0.00154651	0.0112748	0.00787564	3154	tags=65%, list=15%, signal=55%	ATP6V1B2/ATP5F1B/ATP6V1F/ATP5F1C/ATP6V1C1/ATP6V1C2/ATP5PO/ATP6V1H/ATP6V1A/ATP5F1D/ATP5F1A
GOBP	POSITIVE REGULATION OF FOCAL ADHESION ASSEMBLY	25	-0.584189	-1.88632	0.00154577	0.0112748	0.00787564	4390	tags=52%, list=21%, signal=41%	TEK/KDR/NRP1/ABL1/S100A10/FMN1/COL16A1/IQGAP1/SMAD3/FERMT2/SDC4/MYOC/TSC1
GOBP	NEGATIVE REGULATION OF ACTIN FILAMENT POLYMERIZATION	61	-0.430654	-1.6834	0.00153662	0.0112451	0.0078549	2440	tags=39%, list=12%, signal=35%	TRIOBP/DMTN/RDX/TMSB4X/SLIT2/KANK4/ADD1/TMOD2/TMSB15B/VILL/PFN2/SPTAN1/SCIN/FHOD3/SVIL/EPS8/SPTBN2/MYADM/ADD3/LMOD1/TMOD1/GSN/KANK1/SPTBN1
GOBP	REGULATION OF KERATINOCYTE DIFFERENTIATION	39	0.522348	1.75213	0.00153308	0.0112315	0.00784536	2653	tags=44%, list=13%, signal=38%	SERPINB13/MACROH2A1/PRKCH/TRIM16/ZBED2/IL20/CTSL/CYP27B1/CBFB/OVOL2/ZFP36/ETV4/GRHL1/TP63/AQP3/MACROH2A2/PLAAT4
GOBP	POSITIVE REGULATION OF FIBROBLAST MIGRATION	14	-0.695578	-1.92269	0.00153148	0.0112315	0.00784536	3727	tags=79%, list=18%, signal=65%	BAG4/PAK1/DMTN/PRKCE/DDR2/PTK2/AKAP12/ITGB1/SLC8A1/PAK3/ARHGEF7
GOBP	REGULATION OF INTRINSIC APOPTOTIC SIGNALING PATHWAY	151	0.373239	1.57311	0.00148306	0.0108888	0.00760597	4246	tags=35%, list=20%, signal=28%	S100A9/ENO1/S100A8/PPIF/PYCARD/HDAC1/HIF1A/NDUFA13/IL19/MMP9/VNN1/PPIA/PTPN2/LCK/DDIAS/NDUFS3/VDAC2/BCAP31/TRAP1/MIF/P4HB/FIGNL1/BID/BCL2L12/GPX1/SOD2/HYOU1/RIPK3/ARMC10/NOC2L/SLC9A3R1/PLAUR/BDKRB2/BOK/PTPMT1/TRIAP1/PARK7/TMEM161A/BAX/ING2/PARP1/HTRA2/MDM2/GSDME/BECN1/KDM1A/MCL1/CDKN2D/STYXL1/MAPK7/XBP1/EPO/NCK2
GOBP	POSITIVE REGULATION OF WNT SIGNALING PATHWAY	169	0.356613	1.5241	0.00147773	0.0108615	0.00758694	2159	tags=27%, list=10%, signal=25%	PSME2/PSMB2/CDH3/WNT5A/PSMA5/PSMB5/RUVBL1/PSMA3/PSMD12/PSME4/PSMA2/PSME1/VCP/PSMB6/DEPDC1B/PSMB10/PSMB3/PSMD6/PSMB8/PSMC4/PSMA4/PSMD2/TLR2/PSMD11/PSMD1/PSMD14/PSMC3/PSMB9/NFKB1/PSMA7/PSMD9/PSMD8/CSNK2A1/PSMA1/PSMD13/ATP6V1C2/PSMF1/GSKIP/PSMC5/PSMC2/PSMB1/CSNK1G2/PSMC6/PSME3/PSMD7/CSNK1G3
GOBP	ANATOMICAL STRUCTURE HOMEOSTASIS	445	0.292908	1.37155	0.00147276	0.0108368	0.0075697	4287	tags=28%, list=21%, signal=23%	GJB6/CDH3/NOD2/LTF/PRKCQ/AURKB/CCT5/NEK2/POLE2/HOMER1/PCNA/CCNE1/ABCA12/HIF1A/NHP2/HUS1/RPA3/RAD51/CCNE2/CCT2/PPARGC1B/HNRNPA2B1/MKKS/CCT3/FEN1/GNL3/NOP10/POLE4/TJP2/HNRNPC/CCT7/STN1/ALDOA/SASH3/RDH12/PRDX1/CLCN3/EXO1/SLC2A1/SERPINA3/PINX1/LIPA/CIB2/MYC/BAG3/PNKP/POLE3/CDK5/CSK/CORO1A/POLD2/XRCC6/RFC2/TPRKB/SYK/SNX10/LYZ/DNA2/RAC2/IL6/BLM/RFC3/XRCC5/FH/BRCA2/PIF1/PRKDC/GAR1/POLA2/TFRC/GPR137B/CLD…
GOBP	NEURAL CREST CELL DIFFERENTIATION	89	-0.377529	-1.6049	0.0014706	0.0108328	0.00756689	5087	tags=47%, list=24%, signal=36%	EDNRB/FBXL17/SMAD4/TBX1/ALX1/SEMA4C/SEMA3C/SEMA3A/RADIL/PITX2/TAPT1/EDN3/SEMA6D/FOXC2/NRP1/ERBB4/BMP4/HES1/KITLG/NRTN/JAG1/SOX10/SEMA3E/EDN1/SOX8/SEMA4G/SEMA6A/TWIST1/SEMA3B/KLHL12/LRP6/FOXC1/FN1/BMPR1A/FRZB/MEF2C/FAM172A/ALDH1A2/MAPK1/BMP7/SEMA3G/LAMA5
GOBP	POSITIVE REGULATION OF CD4 POSITIVE ALPHA BETA T CELL ACTIVATION	36	0.53461	1.77294	0.00146895	0.0108325	0.00756666	3986	tags=56%, list=19%, signal=45%	NFKBIZ/IL4R/PRKCQ/CD83/SASH3/IFNG/SOCS1/IL12B/LGALS9/CCL19/IL23A/CD86/NFKBID/XCL1/ANXA1/HLA-DRA/IL12RB1/NLRP3/CD80/FOXP3
GOBP	REGULATION OF PROTEIN LOCALIZATION TO CHROMOSOME TELOMERIC REGION	14	0.700903	1.85184	0.00146003	0.0107786	0.007529	4190	tags=86%, list=20%, signal=69%	CCT5/MACROH2A1/CCT2/CCT3/GNL3/CCT7/TCP1/DKC1/CCT6A/CCT8/GNL3L/WRAP53
GOCC	METHYLOSOME	12	0.74028	1.87655	0.00146003	0.0107786	0.007529	3056	tags=67%, list=15%, signal=57%	SNRPG/SNRPF/SNRPD1/PRMT5/SNRPD3/WDR77/SNRPB/PRMT1
GOBP	IRE1 MEDIATED UNFOLDED PROTEIN RESPONSE	64	0.459889	1.7046	0.00144661	0.010703	0.00747624	4557	tags=44%, list=22%, signal=34%	ATP6V0D1/BAK1/HSPA5/SERP1/DNAJB11/YIF1A/COPS5/SRPRB/HDGF/SHC1/HYOU1/EDEM1/PREB/DDRGK1/PDIA6/GET3/BAX/WIPI1/SSR1/MYDGF/EXTL3/PPP2R5B/GSK3A/TMEM33/XBP1/ACADVL/TPP1/DNAJB9
GOBP	REGULATION OF GENERATION OF PRECURSOR METABOLITES AND ENERGY	156	0.365351	1.55029	0.00144651	0.010703	0.00747624	4158	tags=37%, list=20%, signal=30%	CCNB1/PGAM1/CDK1/PPIF/PRELID1/GHITM/TIGAR/VCP/PHLDA2/HIF1A/EIF6/SHMT2/NUP37/PNPT1/TACO1/NUP210/NUP88/IFNG/TRAP1/CHCHD2/COX7A2P2/PPP1CA/NOS2/SLC25A33/PDE12/UQCC2/NUP50/COX7A2/DNAJC15/RAE1/BNIP3/SEC13/COX17/ANTKMT/PARK7/PASK/RUBCNL/PFKFB2/NUP155/CISD1/IDE/NDC1/PFKFB4/NUP188/PHB2/OPN3/PRKAG1/NUP85/NUP205/GSK3A/PHKG2/PPP1R3D/NUP58/MTOR/NUP107/NUP93/DNAJC30/POM121
GOBP	T HELPER 1 TYPE IMMUNE RESPONSE	40	0.524342	1.76969	0.00143797	0.0106626	0.007448	4509	tags=50%, list=22%, signal=39%	IL4R/BCL3/JAK3/RELB/IL1B/IL12B/CCL19/IL23A/HRAS/LEF1/EBI3/SEMA4A/XCL1/ANXA1/IL12RB1/CCR2/MTOR/CD80/NLRP10/IL33
GOCC	CILIARY PLASM	126	-0.347934	-1.54838	0.00143629	0.0106619	0.00744748	4489	tags=30%, list=22%, signal=24%	DNAH8/INPP5E/KIF17/DNAH9/CFAP36/CEP162/BBS7/AK8/ARL6/DYNC2LI1/EFHC2/SPATA7/DNAL1/TTC30A/IFT172/SEPTIN2/DRC3/LCA5/CFAP91/DZIP1L/DYNC2H1/DNAI7/DYNC2I1/TRAF3IP1/TULP3/SEPTIN7/CCDC113/CAMSAP3/BBS1/WDR35/WDPCP/ATG14/SPAG16/EFHC1/GLI2/GLI3/CCSAP/MAP4
GOMF	PEPTIDE ANTIGEN BINDING	21	0.635424	1.8519	0.00142454	0.0105864	0.00739476	5325	tags=76%, list=26%, signal=57%	TAP1/SLC7A5/TAP2/HLA-E/TAPBP/HLA-DRA/HLA-F/HLA-B/HLA-G/CLEC4M/HLA-DQB1/HLA-A/CD209/HLA-DPB1/HLA-C/SLC7A8
GOBP	POSITIVE REGULATION OF MORPHOGENESIS OF AN EPITHELIUM	32	-0.519059	-1.77531	0.00141134	0.0104999	0.00733433	3467	tags=41%, list=17%, signal=34%	WNT5B/LGR4/ABL1/BMP4/AGT/NOG/SOX8/EGF/LIF/GREM1/AR/WNT2B/GATA3
GOBP	POSITIVE REGULATION OF CHONDROCYTE DIFFERENTIATION	16	-0.679884	-1.93052	0.00140634	0.0104743	0.00731645	1785	tags=50%, list=9%, signal=46%	ACVRL1/HOXA11/BMPR1B/SMAD3/ZBTB16/GLI3/SOX6/SOX5
GOCC	CELL LEADING EDGE	404	-0.260646	-1.33011	0.0014061	0.0104743	0.00731645	4828	tags=35%, list=23%, signal=27%	ARHGAP18/CTTNBP2NL/ATP7A/FLOT1/PIP5K1C/INPP5E/CDC42BPB/ARPIN/MAPT/CDK6/TLR4/MYO1C/SHTN1/RAPH1/LAYN/HDAC6/S100A6/BMX/PTPN13/PSD3/PHLDB2/ARHGAP44/RUFY3/APPL1/TRPV1/SH3YL1/INPPL1/APC/GPER1/ILK/CSPG4/ITGAV/PIK3CA/GABRA2/ALS2/ARHGEF2/RDX/C2CD5/STX2/PLXND1/TIAM2/ASAP3/PKN2/PDE9A/PXN/APP/ABL1/PACSIN2/PTPRK/ITGA5/ROBO2/JCAD/ADGRV1/PARVB/KITLG/WASF2/BCAS3/TLN2/TESC/LDB2/LMO4/FAM107A/KSR1/CYTH3/ABLIM1/AMOT…
GOBP	CILIUM ORGANIZATION	397	-0.263205	-1.34584	0.00140103	0.0104579	0.00730504	5653	tags=37%, list=27%, signal=27%	SFI1/INTU/KIF3C/CDC14B/FLNA/TCHP/EHD3/IFT88/UNC119B/CCDC66/CCP110/RPGR/IFT81/CEP250/CYLD/CEP290/TRIP11/IFT140/OCRL/NEK1/NPHP1/KIF3A/TXNDC15/TMEM216/ARMC2/HAUS4/TTC8/DNAH8/BBS12/RILPL2/CDKL1/HDAC6/DYNC1H1/KIF17/TBC1D32/PTPN23/TOGARAM1/TTLL1/BBIP1/CEP162/BBS7/SPAG1/ARL6/IFT74/DYNC2LI1/IFT27/C2CD3/CCDC57/NME5/TAPT1/ROPN1/DNAL1/TTC30A/IFT172/TEKT3/IFT52/CEP57/FAM149B1/NPHP4/SEPTIN2/TCTN1/CEP120/BBS9/…
GOBP	DNA CATABOLIC PROCESS	39	0.52422	1.7584	0.00138483	0.0103485	0.00722858	4220	tags=44%, list=20%, signal=35%	TREX2/ISG20/DNASE1L3/IL6/ENDOG/ST20/ERI1/ERI2/KPNB1/HMGB2/BAX/XRN2/CASP3/DNASE1L1/REXO4/EXOG/DNASE1L2
GOBP	ACTIN FILAMENT DEPOLYMERIZATION	56	-0.452219	-1.74991	0.00137779	0.0103073	0.00719985	3750	tags=39%, list=18%, signal=32%	TRIOBP/DMTN/PIK3CA/RDX/MICAL1/SWAP70/ADD1/TMOD2/PLEKHH2/DSTN/VILL/SPTAN1/SCIN/SVIL/CFL2/EPS8/SPTBN2/ADD3/LMOD1/TMOD1/GSN/SPTBN1
GOBP	POSITIVE REGULATION OF PROTEIN CONTAINING COMPLEX ASSEMBLY	247	0.328874	1.46231	0.00136988	0.0102596	0.0071665	4294	tags=33%, list=21%, signal=27%	FCHSD1/CLEC7A/PYCARD/CCR7/CXCL13/ARPC5L/VCP/BAK1/PSMC4/ARPC1A/RPA3/BIK/WARS1/FERMT1/GBP5/STMP1/ARPC3/CDC42EP5/ARPC1B/FSCN1/IFNG/PSMC3/ACTR3/CDT1/BID/CKAP5/CORO1A/MMP1/RBX1/PSRC1/HCK/MTLN/PIH1D1/SYK/ARPC2/CD36/RASIP1/PSMC5/PSMC2/BRK1/PSMC6/PLEK/TFRC/ARFIP2/DHX33/C15orf62/WASL/ARPC5/PARK7/CYFIP1/MAPRE1/WASHC5/TNF/PFN1/DRG1/BAX/ERCC1/PARP1/CAND1/EIF4G1/LCP1/BAIAP2/ICAM1/HIP1R/GMFG/GNL3L/WAS/PPP2R5B/…
GOBP	POSITIVE REGULATION OF CHEMOKINE PRODUCTION	58	0.472489	1.71339	0.00136437	0.0102298	0.00714565	4807	tags=47%, list=23%, signal=36%	WNT5A/NOD2/CLEC7A/IL4R/MYD88/PYCARD/HIF1A/ADAM17/TLR2/IFNG/IL1B/HMOX1/DEFB124/SYK/IL6/LGALS9/FFAR2/TSLP/TNF/MCOLN2/IL17F/EIF2AK2/CHIA/IL33/AIF1/AGER/TICAM1
GOMF	CARD DOMAIN BINDING	16	0.690498	1.91206	0.00136324	0.0102298	0.00714565	3704	tags=62%, list=18%, signal=51%	NOD2/CASP4/CASP1/CARD14/CARD16/CARD9/BCL10/CARD18/CARD11/CARD10
GOBP	NEGATIVE REGULATION OF CYSTEINE TYPE ENDOPEPTIDASE ACTIVITY	77	0.429398	1.63357	0.0013611	0.010228	0.00714444	3676	tags=38%, list=18%, signal=31%	LTF/IFI16/DNAJB6/LAMP3/IFI6/MMP9/SFN/CST7/LAMTOR5/SERPINB9/BCL2L12/RPS6KA1/GPX1/CSNK2A1/PIH1D1/CD27/CAAP1/PLAUR/BEX3/CARD16/SIAH2/PRDX5/TRIAP1/PARK7/TNF/TNFAIP8/NLE1/CARD18/CDKN2D
GOBP	POSITIVE REGULATION OF CELLULAR PROTEIN LOCALIZATION	290	0.321649	1.44996	0.00136093	0.010228	0.00714444	4044	tags=34%, list=19%, signal=28%	ZC3H12A/RAN/EPHA2/PARP9/CDK1/TFDP1/GZMB/NDC80/FZD5/ABHD17C/RER1/CCT5/ABCA12/DTX3L/PRKCH/RAB11A/NMT1/UBE2L3/YWHAQ/CCT2/ZPR1/CCT3/GNL3/UBE2D3/SFN/ECT2/EPHB2/CCT7/MEAK7/IFNG/LAMTOR5/MESD/PINX1/CDT1/UBL5/ATG13/BAG3/BID/CDK5/CD247/MTCL1/PDCD5/PLK1/TCAF2/LIMK2/RAC2/SESN2/ITGB2/CIB1/SAE1/HRAS/TFRC/GPR137B/CASP8/DDRGK1/TP63/RHOG/TARDBP/TCP1/YWHAZ/ARIH2/PARK7/PIK3R2/DKC1/GPSM2/UBE2J2/NIPBL/HCLS1/CCT6A/SRE…
GOCC	HOST CELLULAR COMPONENT	59	0.466367	1.7035	0.00135324	0.0101918	0.00711911	4816	tags=51%, list=23%, signal=39%	RAN/KPNA2/DYNLT1/NUP37/NUP210/IFIT1/NUP88/NUP50/VPS37A/RAE1/SEC13/KPNB1/NUP155/VPS37B/NDC1/UBAP1/NUP188/NUP85/KPNA3/NUP205/MVB12A/NUP58/NUP107/NUP93/POM121/RAB29/NUP160/CLEC4M/NUP35/NUP42
GOBP	REGULATION OF GENE SILENCING BY RNA	112	0.390893	1.58599	0.00135143	0.0101896	0.00711759	4816	tags=41%, list=23%, signal=32%	ZC3H12A/EIF4E2/POLR2H/NUP37/POLR2F/STAT3/NUP210/ZMPSTE24/TARBP2/NUP88/NUP50/IL6/POLR2L/ZFP36/ADAR/POLR2G/ELAVL1/POLR2D/RAE1/XPO5/SEC13/H3C10/NUP155/POLR2E/TNF/MYCN/NDC1/EIF4G1/NUP188/NUP85/POLR2I/NUP205/NUP58/MAP2K1/NUP107/NUP93/POM121/POLR2J/H3C7/NUP160/H3C8/H4C4/H4C9/NUP35/MAP2K2/NUP42
GOBP	CARDIAC SEPTUM MORPHOGENESIS	63	-0.428749	-1.67481	0.00133099	0.0100467	0.0070178	5056	tags=43%, list=24%, signal=33%	SMAD4/TBX1/SEMA3C/WNT11/HEY1/TGFB2/SAV1/NRP1/BMP4/ROBO2/HES1/JAG1/TBX3/DHRS3/SOX4/SLIT2/NOG/PARVA/SLIT3/FGFR2/BMPR1A/RBPJ/TGFBR2/BMP7/ZFPM2/NOTCH2/TGFBR3
GOBP	INTRINSIC APOPTOTIC SIGNALING PATHWAY IN RESPONSE TO DNA DAMAGE	98	0.410344	1.62904	0.00132258	0.00999444	0.00698128	3676	tags=38%, list=18%, signal=31%	EPHA2/IFI16/PYCARD/BCL2A1/POLB/BAK1/DDIAS/BCL3/SFN/AEN/MIF/IKBKE/BID/HMOX1/CDKN1A/BCL2L12/BRCA2/PRKDC/CHEK2/TNFRSF1B/BOK/TP63/TRIAP1/HIPK2/TNFRSF1A/BRCA1/TNF/TMEM161A/PML/BAX/ING2/HTRA2/CIDEB/SHISA5/KDM1A/MCL1/CDKN2D
GOBP	REGULATION OF TRANSCRIPTION INVOLVED IN G1 S TRANSITION OF MITOTIC CELL CYCLE	34	0.54488	1.78874	0.00131297	0.00993303	0.00693838	2984	tags=44%, list=14%, signal=38%	RRM2/TFDP1/PCNA/CCNE1/TYMS/CDC6/CDC45/ZPR1/CDT1/CDK5/ORC1/DHFR/FBXO5/E2F6/RB1
GOBP	CHEMOKINE PRODUCTION	89	0.419016	1.63567	0.00130672	0.0098969	0.00691315	2901	tags=29%, list=14%, signal=25%	S100A9/WNT5A/NOD2/S100A8/EPHA2/CLEC7A/IL4R/MYD88/PYCARD/GSTP1/HIF1A/ADAM17/TLR2/IFNG/IL1B/HMOX1/DEFB124/SYK/IL6/LGALS9/FFAR2/CXCL6/LILRB4/TSLP/TNF/TREM2
GOBP	REGULATION OF DNA REPLICATION	105	0.403488	1.62007	0.00130289	0.00987905	0.00690068	3537	tags=34%, list=17%, signal=29%	TIMELESS/PCNA/TNFAIP1/PPP2CA/CDC6/CCNA2/STOML2/S100A11/E2F8/DBF4/ZMPSTE24/STN1/CDT1/GTPBP4/DONSON/WDR18/RFC2/DNA2/BLM/RFC3/BRCA2/ATG7/CDC7/EREG/FBXO5/HRAS/CHEK2/ESCO2/MAP2K4/ORC5/ATAD5/MSH3/METTL4/RFC4/PPP2R1A/RBBP6
GOBP	NECROTIC CELL DEATH	54	0.487651	1.76645	0.00129078	0.00979824	0.00684423	4189	tags=44%, list=20%, signal=36%	PPIF/PYGL/CASP1/CFLAR/MLKL/PGAM5/BIRC3/RIPK3/TMEM123/CASP8/FADD/BNIP3/BOK/ALKBH7/LY96/TNF/MAP3K5/FASLG/BAX/TSPO/PELI1/GSDME/TRAF2/RBCK1
GOMF	SINGLE STRANDED DNA HELICASE ACTIVITY	19	0.660208	1.89628	0.00128197	0.00974239	0.00680521	4746	tags=74%, list=23%, signal=57%	MCM6/RAD51/MCM5/MCM2/MCM7/RFC2/DNA2/RFC3/POLQ/PIF1/RFC4/WRNIP1/CHTF18/RFC5
GOBP	MOVEMENT IN HOST ENVIRONMENT	169	0.358664	1.53286	0.00124669	0.00948505	0.00662546	4109	tags=37%, list=20%, signal=30%	SERPINB3/KRT6A/TRIM14/EPHA2/CDK1/CXCR4/TMPRSS4/LDLR/PLSCR1/DYNLT1/PHB/TRIM22/PPIA/CXCL8/VAPA/CTSL/TRIM15/ACE2/IFITM1/P4HB/TRIM62/TRIM21/FCN1/TRIM10/IFITM3/LGALS9/CCR5/SLC52A2/SMPD1/XPR1/SELPLG/ITCH/NPC1/TFRC/VAMP8/TRIM5/SLAMF1/SIVA1/CD86/IDE/VPS37B/EXOC2/PML/SNX3/CLEC4G/ICAM1/CIITA/TRIM25/PC/KPNA3/IFITM2/TNFRSF4/TRIM11/NECTIN2/SLC20A2/CDH1/CHMP2A/CD80/PTX3/SLC1A5/HYAL3/GPR15
GOCC	RESPIRATORY CHAIN COMPLEX III	11	0.749062	1.85891	0.00124653	0.00948505	0.00662546	3899	tags=82%, list=19%, signal=67%	UQCRQ/UQCRH/UQCRFS1/UQCR10/CYC1/UQCC3/UQCRC2/UQCRC1/BCS1L
GOBP	POSITIVE REGULATION OF T CELL MIGRATION	29	0.585569	1.83753	0.00124247	0.00947435	0.00661798	3616	tags=59%, list=17%, signal=49%	WNT5A/CCL20/S100A7/PYCARD/CXCL13/CXCL10/ADAM17/ITGA4/DOCK8/OXSR1/ADAM10/ADAM8/FADD/CCL5/XCL1/CCR2/TMEM102
GOBP	NEURAL TUBE PATTERNING	33	-0.545292	-1.89304	0.00123679	0.00944173	0.0065952	5211	tags=45%, list=25%, signal=34%	IFT140/FOXA1/TBC1D32/PRKACB/TCTN1/BMP4/HES1/DZIP1L/EN1/TULP3/LRP6/PTCH1/WDR19/GLI2/GLI3
GOBP	DEVELOPMENT OF PRIMARY SEXUAL CHARACTERISTICS	208	-0.305002	-1.44218	0.00123356	0.0094278	0.00658547	3121	tags=26%, list=15%, signal=22%	SIRT1/ROBO2/PDGFRB/KITLG/ATRX/CSDE1/TESC/DACH1/LEP/SPATA2/MGST1/GNRH1/SLIT2/LHCGR/SOX8/WDR48/ESR1/FGF9/CTNNA1/KDM5A/PGR/SLIT3/AKR1C3/FOXC1/ZFX/HOXA11/BMPR1B/IRX5/STAR/ZFPM2/OSR1/FZD4/HOXA10/IMMP2L/WDR19/STAT5B/PLEKHA1/ACVR1B/NUPR1/AGO4/PDGFRA/INHBB/FST/RNF38/AR/PATZ1/KIT/BCL2/SOD1/RHOBTB3/WNT2B/CCND1/ANG/GATA3
GOBP	CYCLIC NUCLEOTIDE MEDIATED SIGNALING	88	-0.396913	-1.69269	0.00122557	0.00937742	0.00655028	5683	tags=38%, list=27%, signal=27%	MGRN1/APLNR/PDE4D/DGKQ/EDNRB/PEX5L/AKAP6/CAP2/NDUFS4/PCLO/GUCY1B1/RAPGEF4/NPR1/PDE3A/PDE9A/GAL/RGS2/KSR1/NPR2/RAPGEF3/PRKAR2B/APOE/PRKG1/PDE2A/PDE4A/EIF4EBP2/RAPGEF2/CRTC3/LPAR1/AQP1/GNAI1/IRAG1/ADCY2
GOCC	RNA POLYMERASE I COMPLEX	13	0.723223	1.87379	0.00122511	0.00937742	0.00655028	3892	tags=69%, list=19%, signal=56%	POLR2H/POLR2F/POLR1H/POLR2L/POLR1C/POLR1B/POLR2E/POLR1G/POLR1A
GOBP	REGULATION OF T CELL DIFFERENTIATION	142	0.375667	1.56937	0.0012001	0.00920354	0.00642882	4618	tags=44%, list=22%, signal=34%	ZC3H12A/NFKBIZ/PNP/PRELID1/IL4R/CD83/VNN1/PTPN2/IRF1/PRDM1/CD2/SASH3/RHOH/AP3D1/JAK3/IFNG/SOCS1/CBFB/IL12B/FANCD2/ZC3H8/SYK/IL7R/LGALS9/CCL19/CD27/AP3B1/IL23A/LAG3/IL2RA/ADAM8/LILRB4/TNFSF9/CD86/CRTAM/TMEM131L/LEF1/IL36B/NFKBID/IL1RL2/ANXA1/HLA-DRA/IL12RB1/CCR2/LILRB2/FOXN1/IL15/CARD11/ZAP70/NLRP3/HLA-G/CD80/FOXP3/XBP1/ZNF683/CR1/PTPRC/CD28/MALT1/FANCA/HLA-DOA/NKAP
GOBP	REGULATION OF NON CANONICAL WNT SIGNALING PATHWAY	23	-0.591144	-1.86564	0.00119724	0.0091921	0.00642083	3467	tags=61%, list=17%, signal=51%	WNT5B/ABL1/DAB2/RSPO3/MLLT3/NKD1/DACT1/DKK1/CSNK1D/ANKRD6/GPC3/NPHP3/DAAM2/ZNRF3
GOBP	FEMALE MEIOTIC NUCLEAR DIVISION	25	0.612255	1.8444	0.00119409	0.00917836	0.00641123	2785	tags=40%, list=13%, signal=35%	CCNB2/AURKA/TTK/TRIP13/CDC25B/TOP2A/PLK1/EREG/FBXO5/WASHC5
GOBP	SEGMENT SPECIFICATION	16	-0.683702	-1.94136	0.00119164	0.00917001	0.0064054	5282	tags=75%, list=25%, signal=56%	DLL1/IRX3/BMI1/MAFB/MEOX1/IRX2/MLLT3/DVL2/MEOX2/OSR1/IRX1/COBL
GOBP	REGULATION OF PHAGOCYTOSIS	87	0.420275	1.63223	0.00118275	0.00911202	0.00636489	5233	tags=48%, list=25%, signal=36%	NOD2/CLEC7A/PYCARD/PLSCR1/RAB27A/TLR2/LMAN2/IFNG/RAB31/IL1B/CCL2/ATG5/CSK/HCK/SYK/LYAR/CD36/IL2RG/ATG3/C2/SIRPG/CYBA/SFTPD/TNF/TREM2/SNX3/IL15/DOCK2/SPHK1/CD300A/PTX3/IL15RA/FGR/CD300LF/ABCA7/PTPRC/DNM2/FCER1G/IL2RB/SYT7/FPR2/PRTN3
GOMF	DNA POLYMERASE BINDING	17	0.668836	1.86623	0.00118169	0.00911202	0.00636489	3748	tags=65%, list=18%, signal=53%	PCNA/RAD51/FANCI/CDT1/FANCD2/LONP1/NAT10/SMARCA4/PTGES3/NABP2/CDK2AP1
GOBP	MEIOTIC CHROMOSOME SEPARATION	25	0.613306	1.84756	0.00117806	0.00909679	0.00635426	1635	tags=28%, list=8%, signal=26%	TTK/CENPX/TOP2A/SHOC1/CHFR/ESPL1/CENPS
GOBP	LYMPHOCYTE ACTIVATION INVOLVED IN IMMUNE RESPONSE	184	0.347341	1.49379	0.00117295	0.00906774	0.00633396	4902	tags=38%, list=23%, signal=29%	ZC3H12A/NFKBIZ/IL4R/ENTPD7/RAB27A/BCL3/STAT3/PLCG2/JAK3/IFNG/EXOSC3/EXO1/RELB/CORO1A/IL12B/IL6/LGALS9/CCL19/IL23A/BATF/NSD2/MAD2L2/GPR183/RNF168/PGLYRP2/TFRC/HMCES/HLA-DMB/ITGAL/VAMP7/CD86/LIG4/HSPD1/DOCK10/EOMES/LEF1/SEMA4A/NFKBID/PGLYRP3/ERCC1/RNF8/ANXA1/LCP1/HLA-DRA/ICAM1/IL12RB1/HLA-F/CD244/LILRB1/UNC13D/NLRP3/MTOR/CD80/IL10/FOXP3/XBP1/PARP3/ZNF683/CR1/TNFSF13/PTPRC/CD28/MALT1/FCER1G/CD40/TBX…
GOBP	RHYTHMIC PROCESS	287	-0.283989	-1.39927	0.00117092	0.00906253	0.00633032	4492	tags=34%, list=22%, signal=27%	USP9X/MAPK10/NCOA1/CRY1/NR1D2/MTA1/CIPC/MAGEL2/NONO/TGFB2/GAS2/SERPINF1/EGR2/MSTN/GNAQ/NCOA2/RBM4B/BTRC/UBE3A/PTEN/PHLPP1/LGR4/ZNF830/RAI1/EGR3/NCOR1/SIRT1/SIN3A/RORB/NPAS2/ROBO2/KCND2/RBM4/RORC/HS3ST2/CAVIN3/SFPQ/NR1H3/LEP/CIART/HLF/GNRH1/PER3/SLIT2/ADIPOQ/LHCGR/DBP/NLGN1/TIMP4/ARNTL/ADRB1/TWIST1/ESR1/METTL3/JUND/PPARG/PER2/EGFR/KDM5A/PGR/KLF10/CLOCK/NPY5R/CREBBP/SLIT3/DYRK1A/OGT/CSNK1D/PAM/KLF9…
GOBP	ORGANOPHOSPHATE CATABOLIC PROCESS	146	0.379898	1.59357	0.00116886	0.00905695	0.00632643	3538	tags=31%, list=17%, signal=26%	GDA/TYMP/PLBD1/UPP1/PNP/GDPD3/PGM2/ACOT7/PLA2G4D/LDLR/NUDT15/VCP/ENTPD7/LIPG/SMPD3/TDG/NT5C2/HPRT1/PLCG2/GPCPD1/AMPD3/ITPA/CNP/IMPA2/NUDT5/XDH/DNPH1/INPP1/GPX1/PDE8A/DCTPP1/SMUG1/MTMR2/NUDT1/SMPD1/BPNT1/SMPD2/SYNJ2/PRDX6/PRKCD/DERA/NUDT13/PNPLA8/ABHD16A/SAMHD1
GOBP	PROTEIN LOCALIZATION TO NUCLEAR BODY	12	0.746108	1.89132	0.0011664	0.00904833	0.0063204	2945	tags=67%, list=14%, signal=57%	CCT5/CCT2/CCT3/CCT7/TCP1/DKC1/CCT6A/CCT8
GOBP	REGULATION OF EPITHELIAL CELL MIGRATION	227	-0.303572	-1.45063	0.00115954	0.00900557	0.00629053	4621	tags=41%, list=22%, signal=32%	PDGFB/DAB2IP/CTSH/HDAC6/PTPN23/TEK/SEMA3A/CAPN7/KDR/HDAC9/HDAC5/TGFB2/SERPINF1/PRKD2/ANGPT1/SCARB1/TACSTD2/MAP2K5/PTEN/FOXC2/NRP1/PRKCE/IQSEC1/VEGFC/TAC1/FGF1/SIRT1/ABL1/BMP4/SRPX2/JCAD/SMOC2/AGT/PRKD1/RGCC/BCAS3/TMSB4X/CLASP1/PTPRM/STAT5A/EDN1/MACF1/SLIT2/SPRED1/PRKCA/SVBP/DOCK5/MMRN2/MET/EFNA1/DUSP10/PPARG/EGF/SASH1/RRAS/ACVRL1/ADGRA2/SYNJ2BP/APOE/PTK2/PIK3CB/PFN2/MECP2/RHOB/KLF4/NR2F2/FGFR1/PT…
GOBP	NEGATIVE REGULATION OF INTERLEUKIN 12 PRODUCTION	17	0.66964	1.86847	0.00114997	0.00894155	0.00624582	3970	tags=65%, list=19%, signal=52%	NOD2/C1QBP/CCR7/JAK3/NFKB1/TIGIT/SLAMF1/TLR8/IRAK3/LILRB1/IL10
GOBP	POSITIVE REGULATION OF IMMUNOGLOBULIN PRODUCTION	43	0.523258	1.79498	0.00113695	0.00885057	0.00618226	6698	tags=74%, list=32%, signal=51%	IL4R/SASH3/EXOSC3/GPI/IL6/NSD2/MAD2L2/TFRC/HMCES/HLA-E/XCL1/STX4/TNFRSF4/MZB1/IL10/XBP1/TNFSF13/PTPRC/CD28/IL33/CD40/TBX21/MLH1/KMT5C/CLCF1/TP53BP1/PAXIP1/IL13/IL5/TLR9/TNFSF4/TGFB1
GOBP	DE NOVO PROTEIN FOLDING	39	0.528705	1.77345	0.00113304	0.00883038	0.00616817	5046	tags=64%, list=24%, signal=49%	HSPA5/CCT2/ERO1A/HSPA14/HSPA9/CHCHD4/HSPE1/HSPA8/HSPH1/TOR1A/DNAJB1/FKBP1B/SDF2L1/DNAJC7/TOR2A/HSPD1/DNAJC2/PTGES3/TOR1B/DNAJB5/DNAJB12/SDF2/ENTPD5/FKBP1A/SELENOF
GOBP	REGULATION OF PROTEIN DEPOLYMERIZATION	82	-0.397202	-1.65774	0.00112703	0.00879374	0.00614257	3828	tags=39%, list=18%, signal=32%	APC/TRIOBP/DMTN/CAMSAP2/PIK3CA/ARHGEF2/RDX/SWAP70/ATXN7/CLASP1/ADD1/TMOD2/FGF13/PLEKHH2/BMERB1/DSTN/VILL/SPTAN1/CAMSAP3/TTBK2/SCIN/SVIL/CFL2/MAP1A/EPS8/SPTBN2/ADD3/LMOD1/TMOD1/GSN/SPTBN1/MAP1B
GOBP	NEGATIVE REGULATION OF CYTOSKELETON ORGANIZATION	150	-0.346619	-1.57966	0.0011213	0.00875921	0.00611845	3828	tags=35%, list=18%, signal=29%	APC/TRIOBP/DMTN/CAMSAP2/PIK3CA/PRKN/TACSTD2/ARHGEF2/RDX/WASF2/TMSB4X/SWAP70/ATXN7/CLASP1/CENATAC/SLIT2/KANK4/ADD1/MET/TMOD2/FGF13/PLEKHH2/TMSB15B/SHANK3/BMERB1/VILL/DYRK1A/PFN2/CLIP3/SPTAN1/MAP2/SNCA/CAMSAP3/ARHGAP6/TTBK2/SCIN/FHOD3/SVIL/MYOC/EPS8/SPTBN2/CORO2B/MYADM/PIK3R1/ADD3/LMOD1/DLC1/TMOD1/CGNL1/GSN/KANK1/SPTBN1/MAP1B
GOBP	STRIATED MUSCLE CELL DEVELOPMENT	101	-0.378981	-1.63256	0.00111273	0.00870232	0.00607871	3113	tags=34%, list=15%, signal=29%	DNER/OBSL1/KRT8/HDAC9/CAPN3/KRT19/BMP4/PDGFRB/LOX/SHOX2/EDN1/ACTC1/TMOD2/ACTA1/MYH3/AKAP13/SKI/FHOD3/CFL2/TNNT1/FLNC/CSRP1/SGCB/NEBL/PDGFRA/LMOD1/DMD/MYH11/TPM1/TMOD1/PGM5/CAV2/BCL2/MEF2A
GOBP	MORPHOGENESIS OF A POLARIZED EPITHELIUM	142	0.376504	1.57287	0.00110829	0.00867776	0.00606156	3178	tags=33%, list=15%, signal=28%	PSME2/PSMB2/WNT5A/PSMA5/PSMB5/FZD5/AP2S1/PSMA3/PSMD12/PSME4/PSMA2/PSME1/GRHL3/PSMB6/PSMB10/PSMB3/PSMD6/PSMB8/PSMC4/PSMA4/PSMD2/PSMD11/PSMD1/PSMD14/PSMC3/PSMB9/PSMA7/PSMD9/PSMD8/PSMA1/PSMD13/RAB10/PSMF1/PSMC5/PSMC2/PSMB1/PSMC6/SLC9A3R1/PSME3/PSMD7/PSMC1/TP63/SCRIB/PFN1/PSMB7/PSMD10/SAPCD2
GOCC	SMN SM PROTEIN COMPLEX	16	0.696672	1.92915	0.00110814	0.00867776	0.00606156	5481	tags=81%, list=26%, signal=60%	SNRPG/SNRPF/SNRPD1/SNRPD3/GEMIN6/GEMIN7/SNRPB/STRAP/GEMIN2/SNRPD2/GEMIN8/SNRPE/DDX20
GOBP	REGULATION OF CYCLIN DEPENDENT PROTEIN KINASE ACTIVITY	98	0.412242	1.63658	0.00110099	0.00864075	0.0060357	3679	tags=39%, list=18%, signal=32%	CCNB1/CCNB2/CKS2/CDKN3/SERTAD1/CCNE1/CDC6/CCNA2/CCNE2/SFN/ADAM17/CDC25A/CCNC/CCNF/GTPBP4/CDKN1A/PSRC1/PLK1/BCCIP/CKS1B/BLM/PKMYT1/CCND2/HERC5/CCNO/CCNQ/CDK7/MEN1/CDC37/CDKN2A/CDC25C/CCNH/GADD45A/PSMD10/CASP3/CCND3/CDKN2D/CDK4
GOBP	PROTEIN LOCALIZATION TO NUCLEUS	265	0.32707	1.46258	0.001098	0.00862734	0.00602633	4034	tags=34%, list=19%, signal=28%	ZC3H12A/RAN/KPNA2/PARP9/CDK1/CCT5/DTX3L/MMP12/FERMT1/CCT2/ZPR1/GBP2/CCT3/BCL3/HEATR3/ECT2/STAT3/BYSL/CCT7/IPO4/NUP88/IFNG/LAMTOR5/NUP62CL/PINX1/BAG3/CDK5/MFHAS1/CDKN1A/PLK1/SYK/NOLC1/LIMK2/NUP50/INTS13/GLUL/SESN2/CD36/HIKESHI/TOR1A/NXT1/E2F3/TFRC/CSE1L/RANGAP1/RPF2/ELAVL1/SUPT7L/LILRB4/SEC13/TXN/TARDBP/KPNB1/TCP1/PARK7/PIK3R2/DKC1/HCLS1/FBXO4/PAF1/NUP155/CCT6A/PLRG1/PML/CCT8/PARP1/MDM2/SP100/PKIA…
GOBP	CELLULAR RESPONSE TO CAMP	51	-0.471567	-1.79228	0.00108514	0.00853626	0.00596272	4567	tags=45%, list=22%, signal=35%	AKAP6/SLC26A3/CFTR/CPS1/RAP1B/PCK1/DMTN/RAP1A/APP/GPD1/ADIPOQ/RAPGEF3/ZFP36L1/PKD2/SLC8A1/IGFBP5/PDE2A/RAPGEF2/STAR/AKAP9/AQP1/AQP9/EEF2K
GOBP	ADHERENS JUNCTION ORGANIZATION	65	-0.430695	-1.70306	0.00108139	0.00851671	0.00594906	5439	tags=49%, list=26%, signal=37%	CDH13/HIPK1/CDH6/CDH5/PIP5K1C/NUMB/PAK2/PTPN23/CTNNB1/BMP6/CDHR3/RAMP2/CADM1/RDX/NECTIN3/VCL/CADM2/CDH10/ADD1/CTNNA1/CADM3/DSP/CDH12/CDH19/CAMSAP3/FERMT2/NUMBL/DLG5/DCHS1/JAM3/ZNF703/ANG
GOBP	RENAL SYSTEM PROCESS	113	-0.360657	-1.57555	0.00107702	0.00849227	0.00593198	3338	tags=30%, list=16%, signal=25%	TAC1/NPR1/KLHL3/PKN1/ATP6V1B1/ADCY6/ADGRF5/BMP4/AGT/MLLT6/EDN1/ADIPOQ/F2R/ADCY9/ADCY4/PRKAR2B/AKR1C3/GAS6/RAB11FIP2/AKAP11/MAGED2/KCNMA1/ADRA1A/PTPRO/CD34/TFAP2B/AQP1/CORO2B/AGTR1/GSN/BCL2/WFS1/ADCY2/BTC
GOBP	POSITIVE REGULATION OF KERATINOCYTE DIFFERENTIATION	17	0.670909	1.87201	0.00107066	0.00845208	0.00590391	2653	tags=59%, list=13%, signal=51%	MACROH2A1/PRKCH/TRIM16/ZBED2/IL20/CYP27B1/OVOL2/ETV4/MACROH2A2/PLAAT4
GOBP	RNA DEPENDENT DNA BIOSYNTHETIC PROCESS	68	0.460581	1.7163	0.00106327	0.00840356	0.00587002	4208	tags=47%, list=20%, signal=38%	PRKCQ/AURKB/CCT5/NEK2/NHP2/CCT2/PPIA/CCT3/NOP10/HNRNPC/CCT7/STN1/PINX1/PNKP/XRCC5/PIF1/GAR1/TCP1/DKC1/FBXO4/CCT6A/NAT10/CCT8/TINF2/TELO2/GNL3L/PTGES3/RAD50/ATR/MAPKAPK5/WRAP53/RPA1
GOBP	POSITIVE REGULATION OF ANIMAL ORGAN MORPHOGENESIS	29	-0.56188	-1.87568	0.00105652	0.00836006	0.00583964	3262	tags=48%, list=16%, signal=41%	BMP2/FGF1/BMP4/ROBO2/EDN1/SOX8/DKK1/HOXA11/WNT2/CD34/SPRY1/AR/WNT2B/GATA3
GOBP	MYD88 DEPENDENT TOLL LIKE RECEPTOR SIGNALING PATHWAY	35	0.54423	1.80231	0.00105558	0.00836006	0.00583964	4232	tags=46%, list=20%, signal=37%	IRF7/MYD88/IRAK2/IRF1/IRAK1/TLR2/CD36/TNIP1/HSPD1/LY96/TLR8/IRAK3/CD300A/IRAK4/TLR10/CD300LF
GOBP	POSITIVE REGULATION OF OSSIFICATION	48	-0.478195	-1.7971	0.00105412	0.00836006	0.00583964	4360	tags=65%, list=21%, signal=51%	PTPN11/ACVR2A/NELL1/KL/PKDCC/TMEM119/TOB2/TGFB2/ACVR2B/BMP2/BMP6/ATRAID/TAC1/BMP4/ADGRV1/TFAP2A/ATP2B1/ANO6/P2RX7/GPM6B/BMPR1A/PTN/MEF2C/SLC8A1/BMPR1B/SMAD3/BMP7/OSR1/ZBTB16/OSR2/ADRB2
GOBP	MEIOTIC SPINDLE ORGANIZATION	11	0.754656	1.8728	0.00105352	0.00836006	0.00583964	3156	tags=73%, list=15%, signal=62%	CCNB2/AURKA/TUBG1/ESPL1/FBXO5/WASHC5/MYH9/TUBG2
GOBP	PROTEIN LOCALIZATION TO KINETOCHORE	19	0.665543	1.9116	0.00104889	0.00833896	0.0058249	3940	tags=63%, list=19%, signal=51%	CDK1/NDC80/AURKB/TTK/KNL1/ZWILCH/CDT1/RCC2/HASPIN/MIS12/SPDL1/BUB3
GOBP	PTERIDINE CONTAINING COMPOUND METABOLIC PROCESS	31	0.57965	1.84685	0.0010404	0.0082813	0.00578462	4157	tags=55%, list=20%, signal=44%	GCH1/PTS/GGH/TYMS/GART/SHMT2/ATIC/MTHFD1/MTHFD2/MTRR/MTHFD1L/DHFR/SLC19A1/SLC25A32/MTHFR/PIPOX/SPR
GOBP	POSITIVE REGULATION OF DEFENSE RESPONSE TO VIRUS BY HOST	31	0.580045	1.84811	0.0010404	0.0082813	0.00578462	3674	tags=45%, list=18%, signal=37%	ZC3H12A/STAT1/PARP9/PYCARD/DTX3L/AIM2/CGAS/IL12B/PTPN22/IL23A/DDX58/PQBP1/IL12RB1/LILRB1
GOBP	KINETOCHORE ASSEMBLY	17	0.671597	1.87393	0.00103894	0.0082813	0.00578462	3189	tags=65%, list=15%, signal=55%	DLGAP5/CENPN/CENPW/CENPF/CENPX/CENPE/CENPK/CENPA/CENPS/CENPH/MIS12
GOBP	POSITIVE REGULATION OF I KAPPAB KINASE NF KAPPAB SIGNALING	174	0.363432	1.5567	0.0010351	0.00826849	0.00577567	3351	tags=32%, list=16%, signal=27%	S100A12/TRIM14/NOD2/LTF/UBE2N/MYD88/CCR7/CASP1/PLK2/CFLAR/TNFSF10/TRIM22/IRAK1/VAPA/ECT2/TFG/ZDHHC13/TNIP2/LAMTOR5/IKBKE/TRIM62/TRIM21/CASP10/HMOX1/TBK1/IFIT5/PIM2/BIRC3/CD36/LGALS9/CCL19/SLC44A2/SLC20A1/IKBKG/CARD16/TFRC/CASP8/TRIM5/TNFRSF10B/FADD/REL/LTBR/TNFRSF1A/BST2/TNF/CARD9/DDX21/FASLG/NEK6/CHUK/TRADD/PELI1/SECTM1/SHISA5/TRIM25/BCL10
GOCC	CHAPERONIN CONTAINING T COMPLEX	10	0.769789	1.85897	0.00103405	0.00826849	0.00577567	2945	tags=70%, list=14%, signal=60%	CCT5/CCT2/CCT3/CCT7/TCP1/CCT6A/CCT8
GOCC	VACUOLAR MEMBRANE	420	0.300832	1.39757	0.00102575	0.00821335	0.00573715	4905	tags=35%, list=24%, signal=28%	HPSE/TMEM165/AP2S1/MREG/LAMP3/LDLR/CKAP4/ATP6V0D1/DTX3L/DNAJC5/ATP10B/ATP6V1B2/ACP3/TMEM79/VNN1/ATP6V1G1/ATP6V0B/PCSK9/FPR1/SPPL2A/ABCB6/VAPA/BORCS5/SLC7A5/ATP6V1F/BLOC1S2/MEAK7/AP3D1/LAMTOR5/LAMTOR2/CLCN3/AP1S3/SNAP29/KPTN/PI4K2A/BORCS8/SLC36A1/HSPA8/GPR143/AP1M2/IFITM3/TMEM30A/SLC49A4/ATP6V1D/TM9SF1/SYNGR1/SLC3A2/ATP6V1C1/LAMP5/ATP6V1C2/AP3B1/NSF/GNAI3/AP5S1/CTNS/MTMR2/CTSD/THBD/SLC44A2/GRN/NPC…
GOBP	PROTEIN TRANSPORT ALONG MICROTUBULE	67	-0.442168	-1.76568	0.00101726	0.00815511	0.00569647	5820	tags=64%, list=28%, signal=46%	TTC21A/TNPO1/TTC30B/LCA5L/KIF3C/IFT88/RPGR/IFT81/TRIP11/IFT140/KIF3A/MAPK8IP3/BBS12/KIF17/IFT74/DYNC2LI1/IFT27/TTC30A/IFT172/IFT52/KIF5C/LCA5/TTC21B/DYNC2H1/SFPQ/DYNC2I1/TRAF3IP1/PURA/DYNLL2/TERF2/IFT22/TUB/CLUAP1/ARL3/DYNLRB2/CAMSAP3/PCM1/IFT122/WDR35/MAP1A/WDR19/DLG2/DYNLRB1
GOBP	REGULATION OF GENE SILENCING	131	0.385144	1.59768	0.00100769	0.00808803	0.00564962	4879	tags=40%, list=23%, signal=31%	ZC3H12A/EIF4E2/POLR2H/CDC45/NUP37/POLR2F/STAT3/NUP210/ZMPSTE24/TARBP2/NUP88/ATAD2/NUP50/IL6/POLR2L/ZFP36/ADAR/POLR2G/ELAVL1/POLR2D/RAE1/XPO5/SEC13/H3C10/NUP155/POLR2E/TNF/CDK2/MYCN/NDC1/SIRT6/HMGA1/EIF4G1/NUP188/NUP85/POLR2I/NUP205/NUP58/MAP2K1/NUP107/NUP93/H1-2/POM121/POLR2J/H3C7/NUP160/H3C8/H4C4/H4C9/NUP35/MAP2K2/NUP42/H1-5
GOBP	NATURAL KILLER CELL ACTIVATION	80	0.432047	1.65658	0.00100709	0.00808803	0.00564962	4902	tags=41%, list=23%, signal=32%	SLAMF7/ULBP2/RAB27A/PRDM1/TUSC2/CD2/PRDX1/CORO1A/IL12B/IL21R/RASGRP1/ITGB2/PTPN22/IL23A/PGLYRP2/CASP8/HLA-E/PIK3CD/VAMP7/NCR3/PGLYRP3/TYROBP/HLA-F/IL15/CD244/UNC13D/FGR/ZNF683/PTPRC/RHBDD3/TICAM1/IFNE/IFNA2
GOBP	MYELOID LEUKOCYTE MIGRATION	202	0.35089	1.53054	0.00100295	0.0080692	0.00563647	4673	tags=37%, list=22%, signal=29%	S100A12/S100A9/CXCR2/NOD2/S100A8/CCL20/C1QBP/MYD88/S100A7/CCR7/CXCL1/CXCL13/CXCL2/PPIA/CXCL10/CXCL8/CCL18/CCL4/CCL22/CXCL9/S100A14/RHOH/MIF/CCL2/LYN/SLAMF8/DEFB124/CD177/CCL8/SYK/RAC2/IL6/CCL7/CCL19/ITGB2/CXCL17/IL23A/CXCL3/CXCL6/CXCL11/ADAM8/PIK3CD/RHOG/SFTPD/CCL5/TREM2/XCL1/CCR1/PPIB/SRP54/ANXA1/ADGRE2/MCOLN2/WDR1/CCR2/NUP85/CCL17/LGMN/P2RX4/JAML/SERPINE1/CD300A/IRAK4/VAV1/CKLF/CSF3R/C5AR2/HRH1…
GOBP	REGULATION OF BIOMINERALIZATION	89	-0.385663	-1.63948	0.000982171	0.00791154	0.00552634	5450	tags=49%, list=26%, signal=37%	ACVR2A/NELL1/KL/BCOR/ECM1/PKDCC/WNT6/HEY1/TMEM119/S1PR1/RFLNB/ACVR2B/BMP2/BMP6/ATRAID/BMP4/ADGRV1/TFAP2A/ENPP1/DDR2/ATP2B1/ANO6/FBLN7/TWIST1/OMD/P2RX7/GPM6B/GREM1/MGP/GAS6/BMPR1A/PTN/MEF2C/SLC8A1/ROCK2/BMPR1B/SMAD3/BMP7/ASPN/OSR1/NBR1/ANKH/OSR2/ADRB2
GOBP	T CELL MIGRATION	62	0.477791	1.76069	0.000961732	0.00775621	0.00541783	4734	tags=53%, list=23%, signal=41%	C10orf99/WNT5A/CCL20/S100A7/PYCARD/CXCL13/CXCL16/CXCL10/ADAM17/CCL2/ITGA4/RIPK3/GPR183/DOCK8/OXSR1/ADAM10/CXCL11/ITGAL/ADAM8/FADD/PIK3CD/CCL5/XCL1/ICAM1/CCR2/TMEM102/ZAP70/MSN/GPR15/MYO1G/CXCR3/AIF1/AIRE
GOMF	WNT PROTEIN BINDING	30	-0.565725	-1.91744	0.00096002	0.0077517	0.00541469	4256	tags=63%, list=20%, signal=50%	APCDD1L/LRP5/SFRP5/FZD1/RECK/FZD3/ROR1/FZD10/FZD8/FZD7/RYK/LRP6/APCDD1/ROR2/FRZB/PTPRO/FZD4/WIF1/WLS
GOCC	NUCLEAR PORE	75	0.445821	1.68403	0.000959447	0.0077517	0.00541469	4992	tags=48%, list=24%, signal=37%	RAN/MAD2L1/NUP37/NUP210/RANBP1/NUP88/NUP62CL/MX2/NUP50/XPOT/NXT1/CETN2/RANGAP1/RAE1/MVP/SEC13/KPNB1/NUP155/NDC1/GLE1/NUP188/NUP85/KPNA3/NUP205/NUTF2/EIF5A/AGFG1/ENY2/NUP58/NUP107/NUP93/POM121/NUP160/NUP35/NUP42/NXT2
GOBP	REGULATION OF TELOMERE MAINTENANCE	75	0.445924	1.68442	0.000959447	0.0077517	0.00541469	4174	tags=44%, list=20%, signal=35%	PRKCQ/AURKB/CCT5/NEK2/CCT2/HNRNPA2B1/CCT3/GNL3/HNRNPC/CCT7/STN1/PINX1/MYC/PNKP/XRCC5/PIF1/TCP1/DKC1/FBXO4/CCT6A/NAT10/PML/CCT8/ERCC1/SIRT6/PARP1/TINF2/GNL3L/NABP2/RAD50/UPF1/ATR/MAPKAPK5
GOBP	NEGATIVE REGULATION OF NATURAL KILLER CELL MEDIATED IMMUNITY	18	0.673617	1.91027	0.000958905	0.0077517	0.00541469	5020	tags=67%, list=24%, signal=51%	SERPINB4/SERPINB9/LGALS9/HLA-E/KLRD1/CD96/HLA-F/HLA-B/LILRB1/HLA-G/ARRB2/HLA-A
GOBP	RIBOSOMAL SMALL SUBUNIT BIOGENESIS	72	0.455115	1.70988	0.000956481	0.0077517	0.00541469	3675	tags=44%, list=18%, signal=37%	MRPS11/MRPS7/RRP36/TSR1/DCAF13/BYSL/SNU13/NOL10/WDR46/XRCC5/EMG1/UTP4/DDX52/NOP14/FAM207A/RPP40/PRKDC/NPM1/UTP6/RRP7A/LSM6/ABT1/RIOK1/NAT10/NOB1/TBL3/WDR3/NOL11/RRS1/RIOK2/HEATR1/UTP3
GOBP	POSITIVE REGULATION OF ESTABLISHMENT OF PROTEIN LOCALIZATION TO TELOMERE	10	0.772794	1.86623	0.000952633	0.00773856	0.00540551	2945	tags=80%, list=14%, signal=69%	CCT5/CCT2/CCT3/CCT7/TCP1/DKC1/CCT6A/CCT8
GOBP	MITOCHONDRIAL ELECTRON TRANSPORT CYTOCHROME C TO OXYGEN	20	0.652577	1.88608	0.000951404	0.00773793	0.00540507	4183	tags=60%, list=20%, signal=48%	CYCS/COX6B1/COX7B/COX5A/COX8A/NDUFA4/COX6A1/COX10/COX7C/COX5B/COX4I1/COX6C
GOBP	NOTCH SIGNALING PATHWAY	179	-0.320247	-1.50341	0.000946271	0.00770552	0.00538243	4123	tags=34%, list=20%, signal=28%	DNER/TGFB2/GAS2/BMP2/NOTCH3/IFT74/ANXA4/FOXC2/MIB1/PLXND1/IFT172/CNTN1/APP/KRT19/ROBO2/HES1/DTX1/EGFL7/JAG1/DTX4/SPEN/YAP1/SNW1/IL6ST/CCN3/TIMP4/JAG2/TSPAN14/METTL3/EGF/EGFR/NEPRO/ENHO/CREBBP/SYNJ2BP/FOXC1/TM2D3/PBX1/NEURL1B/SORBS2/GALNT11/ZMIZ1/HIF1AN/CFD/RBPJ/FBXW7/TGFBR2/BMP7/PLN/GATA2/CBFA2T2/BCL6/NOTCH2NLA/LFNG/APH1B/ZNF423/NOTCH2/KIT/POSTN/EPN2/MAML2
GOBP	NEURAL TUBE DEVELOPMENT	144	-0.342805	-1.55784	0.00094402	0.00769652	0.00537614	5735	tags=47%, list=27%, signal=34%	SHROOM3/NUP133/INTU/CECR2/SFRP1/MED12/SFRP2/TSC2/TEAD2/IFT140/FOXA1/OPA1/CTHRC1/SEMA4C/SEMA3C/RPS7/PLOD3/TBC1D32/DVL1/PRKACB/DVL3/KAT2A/TGFB2/C2CD3/MIB1/IFT172/IFT52/SETD2/PRICKLE1/TCTN1/ABL1/BMP4/HES1/ZNF358/LMO4/DZIP1L/SOX4/STK3/NOG/DVL2/FZD3/DACT1/EN1/TWIST1/TULP3/LRP6/ARHGAP35/SEC24B/ZFP36L1/GDF7/PKD2/NPHP3/ALDH1A2/SKI/IFT122/SDC4/SALL2/BMP7/PTCH1/DCHS1/TSC1/PLXNA2/PKD1/WDR19/DLC1/GLI2/GLI3/C…
GOMF	GUANYL NUCLEOTIDE EXCHANGE FACTOR ACTIVITY	195	-0.308073	-1.44667	0.000938124	0.00765774	0.00534906	4172	tags=34%, list=20%, signal=28%	RAB3GAP2/FRMD7/RGL1/DENND1A/ARHGEF17/RASGRF2/RAPGEF4/PREX2/RABGEF1/ALS2/SOS1/ARHGEF2/RALGDS/MADD/EEF1D/RAP1A/IQSEC1/ANKRD27/SOS2/DENND3/ARHGEF1/SMCR8/CYTH3/NGEF/DENND5B/DENND5A/ARHGEF15/DOCK5/DOCK4/FBXO8/RAPGEF3/ADRB1/ARHGEF6/FARP1/SPATA13/TRIO/EGF/RAPGEFL1/FNIP1/SH3BP5/ARHGEF5/DENND11/DOCK7/AKAP13/HERC1/SBF2/DOCK1/VAV3/ARHGEF12/DENND2A/RAPGEF2/RAB3GAP1/RALGPS1/ARHGEF40/FGD4/ITSN1/SERGEF/ARFGEF3/…
GOBP	GLAND DEVELOPMENT	402	-0.268139	-1.36653	0.00093095	0.00760842	0.00531461	3956	tags=29%, list=19%, signal=24%	SERPINF1/LRP5/BMP2/PITX2/EDA/UPF2/PCK1/PIK3CA/SOCS2/DUT/BTRC/UBE3A/PTEN/ORAI1/PLXND1/MAFB/RAP1A/CCKBR/PTPN3/KRT18/HMGCL/FSTL3/TG/FGF1/HOXD9/ERBB4/ABL1/EDAR/FEM1B/BMP4/WNT7B/JARID2/HES1/TFCP2L1/NRG3/TBX3/LMO4/CSNK2A2/BCL11B/ASXL1/SOX10/NTN4/BTBD7/STAT5A/MST1/NOG/FA2H/DBP/SP3/MET/ESR1/PDGFA/RB1CC1/IRF6/SERPINA5/AACS/EGF/EGFR/PLAG1/CDO1/PGR/SLC29A1/DKK3/LRP6/FOXC1/ARHGAP35/PAM/FGFR2/PBX1/BMPR1A/GDF7…
GOBP	PROTEIN DENEDDYLATION	10	0.773207	1.86723	0.000920065	0.00752862	0.00525886	3853	tags=80%, list=18%, signal=65%	COPS3/COPS5/COPS2/TOR1A/GPS1/COPS6/COPS4/COPS7A
GOBP	BONE MINERALIZATION	105	-0.379589	-1.65525	0.000919212	0.00752862	0.00525886	4004	tags=41%, list=19%, signal=33%	RFLNB/ACVR2B/BMP2/BMP6/ATRAID/LGR4/FGFR3/BMP4/ADGRV1/PTH1R/TFAP2A/ENPP1/LOX/DDR2/ZBTB40/LEP/ATP2B1/ANO6/TWIST1/OMD/KLF10/P2RX7/GPM6B/FGFR2/GREM1/MGP/BMPR1A/ROR2/GPC3/PTN/MEF2C/SLC8A1/BMPR1B/SMAD3/BMP7/ASPN/OSR1/NBR1/ANKH/TUFT1/OSR2/AXIN2/ADRB2
GOBP	METANEPHRIC EPITHELIUM DEVELOPMENT	25	-0.593675	-1.91695	0.000917601	0.00752679	0.00525759	3438	tags=52%, list=16%, signal=43%	LGR4/WNT7B/HES1/WWTR1/YAP1/ADIPOQ/SOX8/LIF/POU3F3/LAMB2/PKD2/OSR1/PKD1
GOBP	RIBONUCLEOSIDE METABOLIC PROCESS	68	0.463348	1.72662	0.000908356	0.00746007	0.00521098	2926	tags=31%, list=14%, signal=27%	RAN/UPP1/PNP/NME1/AHCY/MFN1/ENTPD7/ACP3/APOBEC3B/TJP2/APRT/IMPDH1/NT5C2/HPRT1/XDH/ADK/GNAI3/GMPS/ADA2/AMD1/CASK
GOBP	PROTEASOME ASSEMBLY	13	0.732485	1.89779	0.000900582	0.00740528	0.00517271	4553	tags=69%, list=22%, signal=54%	POMP/PSMD11/PSMG1/PSMD9/PSMD13/ADRM1/PSMD10/PSMG2/PSMD4
GOCC	LAMININ COMPLEX	12	-0.736654	-1.95183	0.000886379	0.00729742	0.00509737	2654	tags=58%, list=13%, signal=51%	NTN4/LAMA3/LAMB2/LAMC1/LAMC2/LAMA5/LAMB4
GOBP	SIGNAL TRANSDUCTION IN RESPONSE TO DNA DAMAGE	129	0.397332	1.64366	0.000872831	0.0071947	0.00502561	5027	tags=45%, list=24%, signal=34%	CCNB1/CDK1/TFDP1/FOXM1/PCNA/AURKA/SMYD2/PLK2/BCL3/SFN/E2F8/ZMPSTE24/DTL/EEF1E1/MIF/CNOT11/BID/CDKN1A/PLK1/PLK3/SESN2/BRCA2/BATF/MAD2L2/CNOT1/PRKDC/CHEK2/BRCC3/BABAM2/TRIAP1/HIPK2/BRCA1/CDK2/CRADD/CDC25C/PML/BAX/GADD45A/PRMT1/MDM2/SP100/PSMD10/CNOT6/KDM1A/MAPK14/ATR/MYO6/RINT1/CASP9/PMAIP1/CNOT10/YJU2/USP10/GRB2/PYHIN1/PRPF19/BABAM1/PIDD1
GOBP	NUCLEOSIDE MONOPHOSPHATE CATABOLIC PROCESS	13	0.734556	1.90315	0.00086813	0.00716474	0.00500469	1371	tags=46%, list=7%, signal=43%	TYMP/UPP1/HPRT1/AMPD3/XDH/DNPH1
GOCC	ACTIN FILAMENT BUNDLE	70	-0.434146	-1.75463	0.000867327	0.00716474	0.00500469	4751	tags=47%, list=23%, signal=37%	PDLIM2/ACTN4/SYNPO/TEK/SHROOM4/DAAM1/RFLNB/ILK/PXN/FAM107A/PDLIM5/ABLIM1/MYL9/ROR1/ACTA1/PTK2/SEPTIN7/SEPTIN11/PDLIM3/FERMT2/MYH14/MYLK/ABLIM3/LIMCH1/LPP/MYH10/NEBL/SYNPO2/TPM1/PDLIM4/PGM5/SORBS1/CRYAB
GOMF	FRIZZLED BINDING	35	-0.538329	-1.87997	0.000856029	0.00708227	0.00494708	4919	tags=60%, list=24%, signal=46%	BAMBI/CTHRC1/WNT6/WNT11/DVL1/DVL3/WNT5B/WNT7B/FZD1/RSPO3/RNF43/DVL2/FZD7/RYK/LRP6/ROR2/SDCBP/WNT2/MYOC/ZNRF3/WNT2B
GOBP	REGULATION OF CELL MORPHOGENESIS	298	-0.288896	-1.43401	0.000843675	0.00698867	0.0048817	3850	tags=30%, list=18%, signal=25%	GRIP1/FAM171A1/HEXB/ILK/TRIOBP/DMTN/SS18L1/PRKN/TACSTD2/RDX/NEDD4L/NRP1/PLXND1/RELN/ZMYM4/SYT1/MFSD2A/DLG1/ANKRD27/ABL1/PARVB/CLDN3/BVES/EFNA5/SEMA3E/S100A13/S100A10/CFAP410/MACF1/FITM2/DVL2/BHLHB9/DOCK5/RHOBTB1/RHOQ/NEDD9/WASF3/PARVA/PALM2AKAP2/TESK1/PTK2/ARHGAP35/ITGA7/PHIP/RHOB/FN1/CAPRIN2/SEPTIN7/SH3D19/LIMS2/EPB41/PTN/SH3KBP1/SYT17/RHOJ/DAG1/CFDP1/FBLN1/DOCK1/FERMT2/SYNE3/MYH14/WDPCP/MYOC/PA…
GOBP	REGULATION OF ENDOTHELIAL CELL MIGRATION	166	-0.333632	-1.55103	0.000839875	0.00696578	0.00486571	4056	tags=40%, list=19%, signal=32%	HDAC9/HDAC5/SERPINF1/PRKD2/ANGPT1/SCARB1/MAP2K5/FOXC2/NRP1/VEGFC/FGF1/SIRT1/ABL1/BMP4/SRPX2/JCAD/SMOC2/AGT/PRKD1/RGCC/BCAS3/TMSB4X/PTPRM/STAT5A/EDN1/SLIT2/SPRED1/PRKCA/SVBP/MMRN2/MET/EFNA1/PPARG/EGF/SASH1/RRAS/ACVRL1/ADGRA2/SYNJ2BP/APOE/PTK2/PIK3CB/MECP2/RHOB/KLF4/NR2F2/FGFR1/PTN/MEF2C/AKT3/RHOJ/STARD13/ROCK2/DNAJA4/ATOH8/MEOX2/ATP2B4/FBXW7/SP1/CCBE1/DCN/GATA2/MAP3K3/PLPP3/PATZ1/GATA3
GOBP	REGULATION OF CELLULAR RESPONSE TO HEAT	77	0.437489	1.66435	0.000839231	0.00696578	0.00486571	4816	tags=51%, list=23%, signal=39%	DNAJB6/RPA3/NUP37/NUP210/HSBP1/NUP88/IER5/BAG3/HSPA8/HSPH1/NUP50/HIKESHI/DNAJB1/RAE1/SEC13/DNAJC7/CHORDC1/NUP155/NDC1/MLST8/DNAJC2/NUP188/NUP85/PTGES3/FKBP4/MAPKAPK2/NUP205/NUP58/MTOR/NUP107/NUP93/ATR/POM121/RPA1/NUP160/AKT1S1/NUP35/MAPK3/NUP42
GOBP	REGULATION OF LYMPHOCYTE DIFFERENTIATION	171	0.363484	1.55359	0.000828207	0.00688601	0.00480999	4929	tags=44%, list=24%, signal=34%	ZC3H12A/NFKBIZ/PNP/PRELID1/IL4R/HMGB3/CD83/VNN1/PTPN2/IRF1/PRDM1/CD2/SASH3/RHOH/AP3D1/JAK3/IFNG/SOCS1/CBFB/SLAMF8/IL12B/XRCC6/FANCD2/ZC3H8/SYK/IKZF3/IL7R/LGALS9/CCL19/CD27/AP3B1/IL23A/LAG3/PRKDC/IL2RA/PGLYRP2/ADAM8/LILRB4/TNFSF9/CD86/CRTAM/TMEM131L/LEF1/IL36B/NFKBID/IL1RL2/PGLYRP3/ANXA1/HLA-DRA/IL12RB1/CCR2/LILRB2/FOXN1/IL15/CARD11/ZAP70/NLRP3/HLA-G/CD80/IL10/FOXP3/XBP1/ZNF683/CR1/PTPRC/CD28/MALT…
GOBP	NUCLEOTIDE EXCISION REPAIR	105	0.410947	1.65002	0.000825399	0.00687117	0.00479962	3451	tags=35%, list=17%, signal=30%	COPS3/PCNA/POLR2H/HUS1/RPA3/POLR2F/BRIP1/PNKP/COPS5/POLD2/RBX1/RFC2/COPS2/POLR2L/RFC3/COMMD1/BRCA2/AQR/CETN2/POLR2G/HMGN1/POLR2D/LIG4/CDK7/ISY1/POLR2E/POLD4/ERCC8/GPS1/CCNH/COPS6/ERCC1/PARP1/RFC4/COPS4/POLD3/POLR2I
GOBP	POSITIVE REGULATION OF DNA BINDING TRANSCRIPTION FACTOR ACTIVITY	259	0.336338	1.50202	0.000824162	0.00686938	0.00479837	3970	tags=31%, list=19%, signal=25%	S100A12/S100A9/TRIM14/WNT5A/NOD2/LTF/S100A8/TFDP1/UBE2N/MYD88/PRKCQ/PYCARD/IRAK2/PRKCH/LRP8/PPARGC1B/CFLAR/TRIM22/PPIA/CARD14/IRAK1/TLR2/STAT3/TRIM15/BUD31/AIM2/FOSL1/ADGRF1/LAMTOR5/RIPK4/NFKB1/IL1B/TRIM62/TRIM21/COPS5/IL18RAP/RPS6KA4/TRAF1/IL6/RIPK3/CD36/LGALS9/ITGB2/CIB1/IKBKG/CARD16/TFRC/NPM1/TRIM5/DDRGK1/DHX33/FLOT2/ADAM8/HIPK2/PARK7/HCLS1/LPAR5/TNF/SMARCA4/DDX58/PPRC1/CHUK/TRIM41/TRADD/ICAM1…
GOMF	CYSTEINE TYPE ENDOPEPTIDASE ACTIVITY INVOLVED IN APOPTOTIC SIGNALING PATHWAY	10	0.776425	1.875	0.000822362	0.00686289	0.00479384	3226	tags=70%, list=15%, signal=59%	CASP4/CASP1/CFLAR/CASP5/CASP10/CASP8/CASP3
GOCC	RNA POLYMERASE II CORE COMPLEX	14	0.716605	1.89333	0.000807593	0.00674802	0.0047136	4846	tags=64%, list=23%, signal=49%	POLR2H/POLR2F/POLR2L/POLR2G/POLR2D/POLR2E/POLR2I/POLR2J/POLR2J2
GOBP	NCRNA EXPORT FROM NUCLEUS	37	0.549163	1.8279	0.000807207	0.00674802	0.0047136	4816	tags=59%, list=23%, signal=46%	RAN/NUP37/NUP210/NUP88/NUP50/XPOT/NOL6/NPM1/RAE1/SEC13/NUP155/NDC1/NUP188/NUP85/NUP205/NUP58/NUP107/NUP93/POM121/NUP160/NUP35/NUP42
GOBP	RNA SPLICING	428	0.300157	1.39737	0.000803505	0.0067306	0.00470144	4998	tags=36%, list=24%, signal=28%	EIF4A3/DDX39A/C1QBP/ESRP2/PPIL1/SNRPG/POLR2H/PPP2CA/SNRPF/SNRPD1/HNRNPA2B1/ZPR1/ZBTB8OS/NCBP1/SRSF9/POLR2F/PRMT5/HNRNPC/DDX41/LSM2/BUD31/PPP4R2/TXNL4A/SF3B3/LSM7/SNRPD3/EFTUD2/WDR77/SNRNP25/SF3B5/LSM1/CD2BP2/SNU13/UBL5/CPSF3/PPIH/LSM10/PSPC1/ALYREF/SNRPA1/GEMIN6/MAGOHB/CSTF2/SNRPC/RTCB/GEMIN7/HSPA8/SF3B6/ZNF326/LSM5/LSM4/POLR2L/SNRPB/SRSF2/AQR/SRPK1/POLR2G/DAZAP1/LUC7L2/ELAVL1/POLR2D/PRPF31/JMJD6…
GOBP	NEGATIVE REGULATION OF EPITHELIAL CELL MIGRATION	70	-0.435806	-1.76133	0.000803082	0.0067306	0.00470144	4590	tags=46%, list=22%, signal=36%	DAB2IP/PTPN23/SEMA3A/HDAC5/SERPINF1/TACSTD2/MAP2K5/PTEN/RGCC/PTPRM/SLIT2/SPRED1/SVBP/MMRN2/DUSP10/PPARG/ACVRL1/SYNJ2BP/APOE/PFN2/MECP2/KLF4/NR2F2/MEF2C/STARD13/DNAJA4/EPPK1/MEOX2/ATP2B4/DCN/MCC/PATZ1
GOCC	ENDOLYSOSOME	24	0.631462	1.90274	0.000801021	0.00672657	0.00469862	4824	tags=54%, list=23%, signal=42%	AP2S1/LDLR/CTSB/PCSK9/CTSL/SMPD1/CTSS/TLR8/CLTA/PRKCD/LGMN/AP2M1/SLC15A4
GOBP	EPITHELIAL TO MESENCHYMAL TRANSITION	144	-0.346123	-1.57291	0.000792981	0.00666739	0.00465728	5115	tags=44%, list=25%, signal=34%	GLIPR2/SMAD4/FOXA1/ALX1/BAMBI/LOXL3/WNT11/DAB2IP/HEY1/MSX1/TMEM100/PHLDB2/CTNNB1/TGFB2/RFLNB/BMP2/LDLRAD4/USF3/PTEN/GCNT2/SPRED2/BMP4/DAB2/RGCC/DACT3/JAG1/WWTR1/CLASP1/NOG/SPRED1/EFNA1/TWIST1/KLHL12/LRP6/FOXC1/S100A4/FGFR2/GREM1/DDX17/GSK3B/FGFR1/PHLDB1/ELL3/SDCBP/DAG1/WNT2/SMAD3/FERMT2/TGFB1I1/RTN4/RBPJ/TGFBR2/BMP7/DLG5/TASOR/PDCD4/IL17RD/SPRY1/TCF7L2/ZNF703/SPRY2/AXIN2/TGFBR3/GATA3
GOBP	LEUKOCYTE APOPTOTIC PROCESS	100	0.42657	1.69793	0.000790352	0.00665361	0.00464766	3351	tags=41%, list=16%, signal=35%	CD274/IRF7/WNT5A/NOD2/SLC7A11/PRELID1/TNFRSF21/PRKCQ/AURKB/CCR7/BAK1/HIF1A/IDO1/ADAM17/CTSL/JAK3/LYN/ZC3H8/IL7R/IL6/RIPK3/LGALS9/CCL19/CD27/DOCK8/NOC2L/CD3G/IL2RA/ADAM8/FADD/PIK3CD/TCP1/HCLS1/CCL5/DNAJA3/CDKN2A/FASLG/BAX/ANXA1/CASP3/BCL10
GOBP	SEGMENTATION	91	-0.396877	-1.69127	0.000771239	0.00650085	0.00454095	5538	tags=48%, list=27%, signal=36%	SFRP1/POFUT1/MED12/SFRP2/DLL1/EP300/PCDH8/SMAD4/IRX3/SEMA3C/SEMA3A/ATM/KAT2A/BMI1/EGR2/XRCC2/FOXC2/MIB1/HOXD8/MAFB/MEOX1/BMP4/IRX2/TBX3/MLLT3/NKD1/DVL2/DMRT2/LRP6/FOXC1/BMPR1A/ROR2/ALDH1A2/SMAD3/RBPJ/MEOX2/PLD6/OSR1/LFNG/PLXNA2/IRX1/TASOR/AXIN2/COBL
GOBP	REGULATION OF ACTIN FILAMENT ORGANIZATION	260	-0.294157	-1.43796	0.000767499	0.00647746	0.00452461	3843	tags=31%, list=18%, signal=26%	ARHGEF10L/ELN/TRIOBP/DMTN/PIK3CA/PRKN/TACSTD2/RDX/NRP1/PRKCE/TAC1/ASAP3/PXN/DLG1/WASHC1/ABL1/CCN2/TENM1/WASF2/RGCC/TMSB4X/CXCL12/SWAP70/CLASP1/S100A10/SLIT2/ARHGEF15/KANK4/RAPGEF3/ADD1/MET/FMN1/TMOD2/WASF3/ALMS1/FER/PLEKHH2/TMSB15B/SHANK3/TESK1/DSTN/BIN1/VILL/SORBS3/ARHGAP35/PFN2/SPTAN1/ARHGEF5/RICTOR/ROCK2/ARHGAP6/SCIN/SMAD3/FERMT2/FHOD3/SVIL/ABI2/SDC4/CFL2/MYOC/PAK3/TSC1/LPAR1/EPS8/SPTBN2/LIMCH…
GOBP	PROTEIN K63 LINKED UBIQUITINATION	55	0.489911	1.77684	0.000758104	0.00640622	0.00447485	4605	tags=53%, list=22%, signal=41%	NOD2/UBE2N/UBE2T/TRIP12/OTUB2/UBE2S/TRIM21/TRAF1/TRAF3/PTPN22/RNF168/ITCH/PLAA/TRIM5/UBE2G1/UBE2V2/ARIH2/HECTD1/RNF126/RNF8/PELI1/OTUB1/PARP10/TRAF4/UBE2E2/TRAF2/NEDD4/RNF152/TRAF3IP2
GOMF	ENDORIBONUCLEASE ACTIVITY	58	0.484873	1.7583	0.000757993	0.00640622	0.00447485	4614	tags=47%, list=22%, signal=36%	ZC3H12A/RNASEH2A/FEN1/EXO1/CPSF3/RIDA/ELAC2/ENDOU/ZC3H12C/ZC3H12D/ENDOG/RPP40/POP5/SND1/POP4/TSEN34/POP1/NOB1/KHNYN/MRPL44/SLFN13/POP7/RPP30/RPP38/EXOG/TSEN2/ENDOV
GOBP	FOLIC ACID CONTAINING COMPOUND METABOLIC PROCESS	25	0.625247	1.88353	0.000753601	0.00638423	0.00445949	4071	tags=60%, list=20%, signal=48%	GCH1/GGH/TYMS/GART/SHMT2/ATIC/MTHFD1/MTHFD2/MTRR/MTHFD1L/DHFR/SLC19A1/SLC25A32/MTHFR/PIPOX
GOBP	OVULATION CYCLE	61	-0.442906	-1.73129	0.000751686	0.00637604	0.00445377	4040	tags=43%, list=19%, signal=34%	TGFB2/GAS2/SERPINF1/MSTN/ZNF830/SIRT1/ROBO2/LEP/GNRH1/SLIT2/LHCGR/TIMP4/ESR1/EGFR/PGR/NPY5R/SLIT3/PAM/PTN/BMPR1B/FZD4/STAT5B/PLEKHA1/NCOR2/AXL/PDGFRA
GOBP	RENAL SYSTEM VASCULATURE DEVELOPMENT	25	-0.598401	-1.93221	0.000747873	0.00635172	0.00443678	4621	tags=64%, list=22%, signal=50%	PDGFB/TEK/ANGPT1/FOXC2/BMP4/HES1/PDGFRB/PECAM1/PKD2/PDGFD/CD34/ACTA2/BMP7/OSR1/PDGFRA/NOTCH2
GOBP	AORTA DEVELOPMENT	51	-0.47836	-1.8181	0.000747257	0.00635172	0.00443678	5058	tags=47%, list=24%, signal=36%	LOXL1/TBX1/LRP1/HEY1/NPRL3/TGFB2/EFEMP2/PLXND1/PRICKLE1/ROBO2/HES1/PDGFRB/LOX/JAG1/SOX4/LEP/ACVRL1/SEC24B/BMPR1A/PKD2/PDE2A/RBPJ/TFAP2B/MYLK
GOBP	PYRUVATE METABOLIC PROCESS	147	0.376635	1.58447	0.000746692	0.00635172	0.00443678	4423	tags=39%, list=21%, signal=31%	ENO1/TPI1/PGAM1/PGK1/HK2/TIGAR/HIF1A/EIF6/SLC16A1/NUP37/NUP210/LDHA/ALDOA/FOXK2/NUP88/IFNG/GAPDH/GPI/GALK1/NUP50/NR4A3/PCK2/GSTZ1/VDAC1/RAE1/DHTKD1/SEC13/ME1/PFKFB2/PFKP/NUP155/PDHB/SLC16A3/PKM/NDC1/PFKFB4/ADPGK/DLAT/NUP188/PRKAG1/NUP85/DLD/PC/ME2/NUP205/OGDHL/ENO3/PGK2/NUP58/NUP107/NUP93/PDHA1/POM121/LDHB/HK3/PDP2/NUP160
GOCC	CHAPERONE COMPLEX	27	0.608317	1.89025	0.00074481	0.00634979	0.00443543	4265	tags=67%, list=20%, signal=53%	CCT5/CCT2/CCT3/DNAJB11/CCT7/PSMG1/BAG3/HSPA8/STIP1/SDF2L1/TCP1/CCT6A/CDC37/CCT8/PTGES3/PSMG2/SDF2/PPP5C
GOBP	TELOMERE MAINTENANCE VIA SEMI CONSERVATIVE REPLICATION	26	0.621823	1.90526	0.000740852	0.00632408	0.00441747	4287	tags=69%, list=21%, signal=55%	POLE2/PCNA/RPA3/FEN1/POLE4/POLE3/POLD2/RFC2/DNA2/RFC3/POLA2/PRIM1/POLD4/RFC4/POLD3/UPF1/RPA1/POLD1
GOBP	CELL REDOX HOMEOSTASIS	43	0.534511	1.83358	0.000724216	0.00618992	0.00432376	5548	tags=58%, list=27%, signal=43%	ERP44/SELENOT/ERO1A/TXNRD1/PRDX1/NOS2/GPX1/RAC2/GLRX2/NCF2/TXN/PRDX5/TXN2/TXNRD3/CYBA/PRDX6/GCLC/DLD/PRDX4/LPO/SELENOS/APEX1/CYBB/NQO1/NCF4
GOBP	POSITIVE REGULATION OF LYMPHOCYTE MIGRATION	35	0.557609	1.84662	0.000716174	0.00612899	0.0042812	3616	tags=54%, list=17%, signal=45%	WNT5A/CCL20/S100A7/PYCARD/CXCL13/CXCL10/CCL4/ADAM17/ITGA4/CCL7/DOCK8/OXSR1/ADAM10/ADAM8/FADD/CCL5/XCL1/CCR2/TMEM102
GOBP	POSITIVE REGULATION OF MITOCHONDRIAL MEMBRANE POTENTIAL	11	0.765351	1.89934	0.000700228	0.00600017	0.00419121	1945	tags=55%, list=9%, signal=49%	MFN1/VCP/STOML2/BID/MTLN/CTNS
GOBP	CARDIAC SEPTUM DEVELOPMENT	95	-0.393161	-1.68142	0.000697088	0.00598089	0.00417775	5212	tags=47%, list=25%, signal=36%	FRS2/RARB/HOXA13/MAML1/HEYL/HEG1/TRIP11/SMAD4/TBX1/SEMA3C/WNT11/HEY1/NPRL3/CRELD1/TGFB2/SAV1/NRP1/PLXND1/BMP4/ROBO2/HES1/JAG1/MATR3/TBX3/LMO4/DHRS3/SOX4/SLIT2/NOG/PARVA/ZBTB14/SLIT3/ANK2/FGFR2/BMPR1A/NPHP3/PDE2A/RBPJ/MDM4/TGFBR2/BMP7/ZFPM2/NOTCH2/TGFBR3/GATA3
GOBP	REGULATION OF MEMBRANE PERMEABILITY	81	0.441091	1.69661	0.000694589	0.00596707	0.00416809	4105	tags=40%, list=20%, signal=32%	TFDP1/PPIF/SLC25A5/GZMB/HK2/BAK1/NMT1/DYNLT1/YWHAQ/TJP2/SFN/BLOC1S2/VDAC2/CNP/BID/RASIP1/CASP8/LAPTM5/BNIP3/TMEM14A/BOK/TP63/ALKBH7/PDCD6IP/YWHAZ/BAX/HIP1R/TMEM102/MAPK8/GSK3A/MTOR/ATP5IF1
GOCC	TERTIARY GRANULE LUMEN	55	0.49209	1.78474	0.000687394	0.00591282	0.0041302	2640	tags=36%, list=13%, signal=32%	TCN1/LTF/LRG1/CSTB/ILF2/CXCL1/GGH/PRSS3/MMP9/ALDOA/DBNL/LYZ/CNN2/NIT2/CTSD/GSDMD/CAMP/CTSS/QSOX1/CYFIP1
GOBP	CANONICAL WNT SIGNALING PATHWAY	318	-0.286773	-1.43128	0.000683902	0.00589033	0.00411449	3828	tags=36%, list=18%, signal=29%	TMEM170B/LRP5/BMP2/APC/PPM1B/EDA/ILK/GNAQ/PRKN/BTRC/JRK/PTEN/TNN/WNT5B/SFRP5/LGR4/RNF220/LGR6/NPHP4/PRICKLE1/WNT7B/DAB2/DACT3/PTPRU/FZD1/RSPO3/SOX10/LRRK2/MLLT3/SOX13/SOX4/WWTR1/RECK/YAP1/NKD1/STK3/WNK1/NOG/DVL2/FZD3/DACT1/DKK1/ARNTL/BCL9/FZD10/LGR5/LATS2/ZBED3/EGF/EGFR/FZD8/FZD7/ADGRA2/RYK/DDIT3/DKK3/GPRC5B/APOE/KLHL12/CSNK1D/LRP6/RNF146/FGFR2/GREM1/SMURF2/ANKRD6/USP34/KLF4/CAPRIN2/GSK3B/CCNY/RO…
GOMF	TRANSMEMBRANE RECEPTOR PROTEIN SERINE THREONINE KINASE ACTIVITY	18	-0.661011	-1.91981	0.000677615	0.00584367	0.0040819	3930	tags=50%, list=19%, signal=41%	ACVR2B/ACVR1C/ACVRL1/LTBP4/BMPR1A/BMPR1B/TGFBR2/ACVR1B/TGFBR3
GOBP	NEGATIVE REGULATION OF PROTEIN CONTAINING COMPLEX ASSEMBLY	132	-0.35243	-1.58445	0.000672858	0.00581011	0.00405845	4098	tags=36%, list=20%, signal=29%	TRIM9/CLU/SORL1/LDLRAD4/TRIOBP/DMTN/RDX/ANKRD27/PRRT2/TMSB4X/LMO4/RPL13A/SLIT2/DACT1/DKK1/TRAF3IP1/KANK4/ADD1/TMOD2/TMSB15B/VILL/DYRK1A/PFN2/AIDA/CLIP3/SPTAN1/PMEPA1/GSK3B/MAP2/SNCA/THRA/SCIN/FHOD3/SVIL/SVIP/EPS8/SPTBN2/MYADM/ADD3/LMOD1/CTNNBIP1/JAM3/TMOD1/GSN/KANK1/SPTBN1/CRYAB/NOP53
GOMF	ALPHA ACTININ BINDING	24	-0.60635	-1.92032	0.000672392	0.00581011	0.00405845	2623	tags=46%, list=13%, signal=40%	PDLIM2/RARA/PDLIM5/MYOT/PPARG/PKD2/DAG1/PDLIM3/MAGI1/SYNPO2/PDLIM4
GOBP	NEGATIVE REGULATION OF DEFENSE RESPONSE	191	0.367904	1.59334	0.000669159	0.00579305	0.00404654	4047	tags=34%, list=19%, signal=27%	SERPINB4/NMI/NOD2/IFI16/PPARD/PBK/C1QBP/NLRX1/LDLR/SOCS3/GSTP1/MMP12/PTPN2/PARP14/SUSD4/UFD1/TARBP2/CST7/ARG1/NFKB1/TRIM21/MFHAS1/SLAMF8/IL12B/SERPINB9/DHX58/GPX1/PSMA1/AOAH/LYAR/LGALS9/TTLL12/CXCL17/ADAR/ITCH/GRN/IL2RA/LPCAT3/NLRC5/HLA-E/TNFRSF1B/TNFRSF1A/NLRC3/MICB/RB1/KLRD1/IRAK3/CD96/PRKCD/YTHDF2/HLA-F/SAMHD1/NPLOC4/SIGLEC10/HLA-B/LILRB1/NLRP3/HLA-G/OTULIN/IL10/RNF26/FOXP3/ILRUN/MAPK7
GOBP	NADH METABOLIC PROCESS	42	0.546326	1.86483	0.000667622	0.0057872	0.00404246	4360	tags=50%, list=21%, signal=40%	ENO1/TPI1/PGAM1/PGK1/HK2/TIGAR/VCP/MDH2/ALDOA/FOXK2/GAPDH/GPI/PCK2/MDH1/PFKP/PKM/ADPGK/NUDT13/ENO3/HK3/SLC25A12
GOBP	DNA REPLICATION CHECKPOINT	17	0.684332	1.90947	0.000666861	0.0057872	0.00404246	2420	tags=47%, list=12%, signal=42%	TIMELESS/CDC6/HUS1/CDC45/CDT1/ORC1/DNA2/CLSPN
GOBP	PYRIMIDINE NUCLEOSIDE BIOSYNTHETIC PROCESS	16	0.711251	1.96953	0.000662407	0.00575686	0.00402126	1723	tags=44%, list=8%, signal=40%	TYMP/UPP1/TK1/UCK2/DTYMK/PUDP/UMPS
GOBP	REGULATION OF PROTEIN MODIFICATION BY SMALL PROTEIN CONJUGATION OR REMOVAL	228	0.344625	1.51925	0.000647089	0.00563101	0.00393335	3843	tags=32%, list=18%, signal=26%	ZC3H12A/CDC20/NMI/NOD2/DCUN1D5/UBE2C/UBE2N/MAD2L1/VCP/ISG15/DTX3L/TRIP12/HIF1A/FANCI/UBE2L3/HSPA5/PPIA/CENPX/GNL3/COPS9/TBC1D7/OTUB2/UBE2S/PRMT3/TOLLIP/PINX1/GTPBP4/CHFR/AIMP2/SIRT7/RAB1A/ATG5/TRIM21/CDK5/UBE2D1/RBX1/PLK1/BIRC3/GLMN/CENPS/PDCD6/PHF23/COMMD1/PTPN22/SAE1/MAD2L2/ITCH/FBXO5/PLAA/HSPBP1/LAPTM5/TNIP1/SIAH2/PARK7/BRCA1/FBXO4/TSPO/PSMD10/PELI1/CDK9/ARRB1/BCL10/CTR9/GNL3L/DAXX/KDM1A/DCUN1…
GOCC	RNA POLYMERASE COMPLEX	99	0.4167	1.65597	0.000643286	0.00560518	0.00391531	4846	tags=43%, list=23%, signal=34%	POLR3G/POLR2H/POLR2F/TAF10/POLR3K/POLR1H/MCM3/POLR3B/GTF2A2/POLR2L/POLR1C/LEO1/GTF2E2/TAF13/POLR2G/POLA2/POLR2D/POLR1B/PRIM1/POLR3D/CDK7/PAF1/POLR2E/POLR1G/GTF2E1/CCNH/TAF11/PEX2/GTF2B/CTR9/POLR2I/POLR1A/RPRD1B/TADA3/MYO6/POLR2J/ZNFX1/SUPT3H/TAF5/RPAP2/TAF2/POLR3A/POLR2J2
GOBP	MYOFIBRIL ASSEMBLY	57	-0.461991	-1.80133	0.000636346	0.00555192	0.0038781	3113	tags=40%, list=15%, signal=34%	OBSL1/KRT8/CAPN3/KRT19/PDGFRB/EDN1/ACTC1/TMOD2/ACTA1/MYH3/AKAP13/FHOD3/CFL2/TNNT1/CSRP1/NEBL/PDGFRA/LMOD1/MYH11/TPM1/TMOD1/PGM5/MEF2A
GOBP	POSITIVE REGULATION OF CANONICAL WNT SIGNALING PATHWAY	139	0.387929	1.61358	0.000627696	0.00548357	0.00383036	2337	tags=30%, list=11%, signal=27%	PSME2/PSMB2/CDH3/PSMA5/PSMB5/RUVBL1/PSMA3/PSMD12/PSME4/PSMA2/PSME1/VCP/PSMB6/PSMB10/PSMB3/PSMD6/PSMB8/PSMC4/PSMA4/PSMD2/PSMD11/PSMD1/PSMD14/PSMC3/PSMB9/NFKB1/PSMA7/PSMD9/PSMD8/PSMA1/PSMD13/PSMF1/GSKIP/PSMC5/PSMC2/PSMB1/CSNK1G2/PSMC6/PSME3/PSMD7/CSNK1G3/PSMC1
GOBP	NEGATIVE REGULATION OF ACTIN FILAMENT DEPOLYMERIZATION	43	-0.508021	-1.86948	0.000624275	0.00546078	0.00381444	3750	tags=44%, list=18%, signal=36%	TRIOBP/DMTN/PIK3CA/RDX/SWAP70/ADD1/TMOD2/PLEKHH2/VILL/SPTAN1/SCIN/SVIL/EPS8/SPTBN2/ADD3/LMOD1/TMOD1/GSN/SPTBN1
GOBP	RESPONSE TO CALCIUM ION	138	-0.347881	-1.57228	0.00062394	0.00546078	0.00381444	3788	tags=32%, list=18%, signal=26%	TRPV6/DMTN/CPNE2/ENTPD6/CAPN3/SEC31A/SYT1/CALM2/CLIC4/ADGRV1/RASA4/CPNE8/KCNMB1/RYR3/EDN1/DUSP1/NLGN1/FOS/CPNE3/ADD1/JUND/EGFR/CACYBP/AKR1C3/ANXA11/ITPKB/PRKAA2/PKD2/MEF2C/SYT17/KCNMA1/IQGAP1/BRAF/ITPR3/TRPC1/CASQ2/CAV1/SYT8/MEF2A/KCNMB4/CCND1/EEF2K/TXNIP/CHP2
GOBP	PROTEIN HOMOOLIGOMERIZATION	172	0.364128	1.55924	0.000607561	0.00532845	0.00372201	4230	tags=31%, list=20%, signal=25%	TK1/PYCARD/KCTD5/ALDH1A3/TNFAIP1/SHMT2/GBP5/MLKL/ECT2/PNPT1/HPRT1/ALDOA/PRF1/MIF/HSD17B10/OSBPL2/TDO2/KCTD11/SOD2/KCTD1/BLM/STEAP4/EHD4/POLQ/KCNJ2/ELAVL1/JMJD6/GSDMD/ACOT13/KCTD21/PDCD6IP/ACACA/KCTD4/KCNS3/KCND3/PRMT1/SIGMAR1/RNF213/BEND3/NLRC4/SHKBP1/B2M/ARC/SAMHD1/ROM1/ALOX5AP/HLA-G/KCNC3/CHMP2A/THG1L/SLC1A5/VASP/KCNG1
GOBP	REGULATION OF NOTCH SIGNALING PATHWAY	103	-0.394887	-1.7082	0.00060544	0.00531679	0.00371386	3048	tags=33%, list=15%, signal=28%	ROBO2/HES1/DTX1/EGFL7/JAG1/YAP1/SNW1/IL6ST/CCN3/JAG2/TSPAN14/METTL3/EGF/EGFR/NEPRO/ENHO/CREBBP/SYNJ2BP/TM2D3/GALNT11/ZMIZ1/HIF1AN/RBPJ/FBXW7/BMP7/GATA2/CBFA2T2/BCL6/NOTCH2NLA/LFNG/KIT/POSTN/EPN2/MAML2
GOBP	NADPH REGENERATION	17	0.689586	1.92413	0.000595835	0.00523929	0.00365973	4085	tags=65%, list=20%, signal=52%	PGAM1/PGM2/TIGAR/PGD/TALDO1/RBKS/SHPK/PGLS/G6PD/DERA/TKT
GOBP	PYRIMIDINE NUCLEOSIDE METABOLIC PROCESS	34	0.565915	1.85779	0.000592843	0.00521981	0.00364612	1723	tags=26%, list=8%, signal=24%	TYMP/UPP1/TK1/UCK2/NT5C3A/APOBEC3B/DTYMK/PUDP/UMPS
GOBP	POSITIVE REGULATION OF DNA METABOLIC PROCESS	193	0.354415	1.53503	0.000587275	0.00517758	0.00361662	4965	tags=38%, list=24%, signal=29%	PARP9/H2AX/UBE2N/FOXM1/PRKCQ/TIGAR/AURKB/CCT5/NEK2/TIMELESS/PCNA/DTX3L/RAD51/CCT2/HNRNPA2B1/CCT3/GNL3/CCT7/RAD51AP1/EXOSC3/MYC/PNKP/RFC2/IL6/ENDOG/ST20/RFC3/XRCC5/NSD2/MAD2L2/RNF168/PRKDC/TFRC/HMCES/BRCC3/UBE2V2/BABAM2/TCP1/DKC1/BRCA1/FBXO4/CCT6A/TMEM161A/ERCC8/PML/CCT8/BAX/ERCC1/SIRT6/PARP1/RNF8/RFC4/PRKCD/PTGES3/WAS/NABP2/RAD50/ATR/PARP3/SLF1/MAPKAPK5/WRAP53/CHTF18/TNFSF13/PTPRC/CD28/CD40/RFC5/…
GOBP	MATURATION OF SSU RRNA FROM TRICISTRONIC RRNA TRANSCRIPT SSU RRNA 5 8S RRNA LSU RRNA	36	0.555067	1.84078	0.000576613	0.00509026	0.00355563	3675	tags=47%, list=18%, signal=39%	MRPS11/RRP36/TSR1/DCAF13/BYSL/NOL10/WDR46/UTP4/NOP14/FAM207A/RPP40/UTP6/ABT1/TBL3/RRS1/HEATR1/UTP3
GOBP	DNA INTEGRITY CHECKPOINT	152	0.373589	1.57809	0.000569372	0.00503295	0.0035156	3136	tags=32%, list=15%, signal=28%	CCNB1/CDK1/TFDP1/H2AX/TIMELESS/PCNA/AURKA/CDC6/HUS1/CDC45/FBXO6/PLK2/SFN/E2F8/DTL/CDT1/BRIP1/DONSON/CNOT11/CDKN1A/ORC1/PLK1/FANCD2/DNA2/PLK3/BLM/CNOT1/PRKDC/WDR76/CHEK2/BRCC3/BABAM2/CLSPN/TRIAP1/INTS7/THOC5/BRCA1/DOT1L/FBXO4/CDK2/CRADD/CDC25C/PML/BAX/GADD45A/PRMT1/MDM2/EME1/RFWD3
GOMF	PSEUDOURIDINE SYNTHASE ACTIVITY	13	0.742736	1.92435	0.000569178	0.00503295	0.0035156	4523	tags=85%, list=22%, signal=66%	TRUB2/PUSL1/PUS10/PUS1/PUS7/DKC1/RPUSD1/TRUB1/RPUSD2/PUS3/RPUSD3
GOMF	TUMOR NECROSIS FACTOR RECEPTOR BINDING	31	0.594038	1.89269	0.000564349	0.00500171	0.00349377	4500	tags=65%, list=22%, signal=51%	STAT1/TNFSF10/LTB/TRAP1/TRAF1/TRAF3/CASP8/FADD/BABAM2/SIVA1/TNFSF9/TNF/FASLG/TNFSF15/TRADD/TNFSF13B/TRAF4/TRAF2/TNFSF13/TNFSF14
GOBP	POSITIVE REGULATION OF PHOSPHATIDYLINOSITOL 3 KINASE SIGNALING	88	-0.410033	-1.74864	0.000557601	0.00494844	0.00345656	3778	tags=43%, list=18%, signal=36%	TEK/KDR/TGFB2/ANGPT1/GPER1/PIK3CA/UBE3A/ERBB3/IL18/ERBB4/SIRT1/PDGFRB/AGT/INSR/LEP/F2R/IGF1R/ROR1/PDGFA/EGF/PTK2/NTF3/PIK3CB/NTRK2/FN1/FGFR1/PDGFD/ROR2/MYOC/DCN/FYN/PIK3R1/PDGFRA/KIT/IRS2/CAT/SERPINA12/PDGFC
GOBP	ACTIVATION OF CYSTEINE TYPE ENDOPEPTIDASE ACTIVITY INVOLVED IN APOPTOTIC PROCESS	85	0.444472	1.72094	0.000557363	0.00494844	0.00345656	3496	tags=42%, list=17%, signal=35%	S100A9/CYCS/S100A8/FAM162A/PYCARD/VCP/BAK1/CFLAR/TNFSF10/LCK/AIFM1/HSPE1/XDH/BID/CASP10/PDCD6/ST20/TNFRSF10A/BEX3/CASP8/TNFRSF10B/FADD/LAPTM5/BOK/HSPD1/TNF/DIABLO/CRADD/PML/FASLG/BAX/TNFSF15/TRADD/HIP1R/NLRC4/PDCD2
GOBP	CELLULAR DEFENSE RESPONSE	51	0.513019	1.83779	0.000557048	0.00494844	0.00345656	4509	tags=49%, list=22%, signal=39%	CXCR2/LGALS3BP/CXCL9/PRF1/FOSL1/GNLY/ADORA2B/CCR5/SH2D1A/NCF2/ITK/FCMR/LY96/IL1RL2/TYROBP/BCL10/CCR2/LILRB2/BECN1/MNDA/HLA-G/NCR2/KLRG1/KLRC3/IL33
GOBP	GENE SILENCING	268	0.330317	1.47921	0.000553176	0.00492869	0.00344277	4929	tags=36%, list=24%, signal=28%	ZC3H12A/RAN/H2AX/EIF4E2/MACROH2A1/H2AZ1/EIF6/POLR2H/EZH2/CDC45/HNRNPA2B1/NCBP1/NUP37/POLR2F/STAT3/NUP210/ZMPSTE24/TARBP2/NUP88/ATAD2/HENMT1/MIR155HG/H2AJ/CNOT11/MIR3142HG/PUS10/NUP50/MSL3/IL6/POLR2L/HAT1/TUT7/CNOT1/ZFP36/ADAR/POLR2G/DPY30/ELAVL1/POLR2D/SND1/RAE1/XPO5/ERI1/SEC13/SPOUT1/MACROH2A2/H3C10/DOT1L/NRDE2/CLP1/NUP155/POLR2E/HDAC2/TNF/CDK2/MYCN/NDC1/SIRT6/HMGA1/EIF4G1/EED/NUP188/CNOT6/MRPL4…
GOBP	PURINE CONTAINING COMPOUND BIOSYNTHETIC PROCESS	197	0.365635	1.58564	0.000542296	0.00483817	0.00337954	3901	tags=32%, list=19%, signal=27%	ENO1/ATP5MF/PNP/AK2/NME1/ACOT7/VCP/ATP5MC3/ATP5PF/GART/ATP5F1B/STOML2/ATP5MC1/SHMT2/APRT/ATIC/IMPDH1/HPRT1/MTHFD1/ATP5PB/ALDOA/SLC25A13/ELOVL7/AMPD3/ADSL/NOS2/ATP5ME/COASY/AK1/ATP5MG/ATP5F1C/ADK/PPT2/UQCC3/HACD1/GSTZ1/ATP5PO/ATP6V1A/GMPS/ANTKMT/ADA2/ACACA/AMD1/PDHB/ADCY3/GCDH/TREM2/PPCDC/PKM/ATP5F1D/PARP1/PRPSAP2/ATP5F1A/ELOVL4/DLAT/PAPSS2/DLD/ATP5PD/ELOVL1/PANK2/VPS9D1/NME7/GMPR2/PRPS2
GOMF	CYSTEINE TYPE ENDOPEPTIDASE ACTIVITY INVOLVED IN APOPTOTIC PROCESS	15	0.713064	1.92872	0.000538792	0.0048133	0.00336217	3226	tags=60%, list=15%, signal=51%	CASP4/PYCARD/CASP1/CASP7/CFLAR/CASP5/CASP10/CASP8/CASP3
GOBP	ATTACHMENT OF MITOTIC SPINDLE MICROTUBULES TO KINETOCHORE	15	0.713144	1.92894	0.000538792	0.0048133	0.00336217	3567	tags=60%, list=17%, signal=50%	NDC80/KIF2C/AURKB/NUF2/CENPE/CDT1/RMDN1/MIS12/BECN1
GOBP	REGULATION OF DNA DEPENDENT DNA REPLICATION	46	0.516275	1.79468	0.000533487	0.00477862	0.00333794	3251	tags=43%, list=16%, signal=37%	TIMELESS/PCNA/STOML2/E2F8/DBF4/ZMPSTE24/CDT1/DONSON/WDR18/RFC2/BLM/RFC3/BRCA2/ATG7/CDC7/FBXO5/CHEK2/MSH3/METTL4/RFC4
GOBP	MUSCLE CELL DEVELOPMENT	155	-0.346866	-1.58943	0.000529306	0.0047475	0.0033162	4123	tags=32%, list=20%, signal=26%	DNER/OBSL1/KRT8/HDAC9/RAMP2/PARP2/EFEMP2/CAPN3/KRT19/BMP4/HES1/PDGFRB/SMYD3/LOX/TBX3/BVES/RGS2/PDLIM5/SHOX2/EDN1/ACTC1/TMOD2/ACTA1/MYH3/ANK2/BIN1/NFATC2/SORBS2/PPARA/SLC8A1/AKAP13/SKI/ADRA1A/FHOD3/CFL2/TNNT1/FLNC/CSRP1/SGCB/NEBL/PDGFRA/LMOD1/DMD/MYH11/TPM1/TMOD1/PGM5/CAV2/BCL2/MEF2A
GOBP	NEGATIVE REGULATION OF TYPE I INTERFERON PRODUCTION	45	0.530835	1.83984	0.000524679	0.00471229	0.00329161	4034	tags=53%, list=19%, signal=43%	NMI/UBE2L6/NLRX1/PYCARD/IFIH1/ISG15/UFD1/RELB/IKBKE/TBK1/DHX58/ITCH/HERC5/NLRC5/REL/LILRA4/NLRC3/DDX58/TRIM25/NPLOC4/LILRB1/UBA7/IL10/ILRUN
GOBP	ACTIN FILAMENT BASED MOVEMENT	145	-0.343896	-1.56583	0.000522884	0.00470246	0.00328474	2151	tags=24%, list=10%, signal=22%	CACNB2/ACTC1/PARVA/FGF13/ACTA1/MYH3/SYNE2/EPDR1/TNNC2/DSG2/FNBP1L/ANK2/DSP/BIN1/MYO5C/MYH14/TNNT1/PLN/AKAP9/TPM2/SCN3B/TNNC1/ATP1A2/VIM/DES/TNNI2/LIMCH1/MYH10/GPD1L/CACNA2D1/DMD/TPM1/TMOD1/GSN/CAV1
GOMF	RIBOSOME BINDING	53	0.506889	1.82494	0.000511862	0.0046095	0.00321981	4674	tags=55%, list=22%, signal=43%	ZC3H12A/C1QBP/EIF6/EIF2S1/HSPA5/TACO1/NAA10/PYM1/MAIP1/PRMT3/SRP19/EIF3K/SHFL/SEC61A1/ERI1/MRPS27/ZNF598/SRP72/RPN2/OLA1/EIF5A/NAA15/MTOR/CPEB4/EFL1/SRP68/SEC61A2/CPEB3/OXA1L
GOMF	ENDONUCLEASE ACTIVITY	112	0.408193	1.65618	0.000503454	0.00453987	0.00317117	5625	tags=47%, list=27%, signal=35%	ZC3H12A/RNASEH2A/FEN1/DNASE1L3/PGBD5/EXO1/APEX2/CPSF3/RIDA/PNKP/DIS3/ELAC2/ENDOU/ZC3H12C/DNA2/RNASE7/ZC3H12D/ENDOG/GEN1/RPP40/POP5/SND1/POP4/TSEN34/POP1/NOB1/ERCC1/EME1/KHNYN/MRPL44/DNASE1L1/REXO4/RAD50/SLFN13/POP7/RPP30/RPP38/EXOG/DNASE1L2/RAD51C/TSEN2/PXDNL/N4BP2/ENDOV/NTHL1/PELO/APEX1/RNASET2/APLF/EME2/ZRANB3/RBBP8/PIWIL1
GOBP	TRNA MODIFICATION	85	0.446853	1.73016	0.000502653	0.00453874	0.00317039	4521	tags=45%, list=22%, signal=35%	WDR4/MTO1/FTSJ1/PUSL1/METTL6/METTL1/HSD17B10/TRMT10C/ELP6/PUS10/DUS1L/TPRKB/MOCS3/TYW5/NSUN2/PUS1/TRMT6/TRMT112/METTL8/TRMU/CTU2/PUS7/MTFMT/NAT10/OSGEP/DUS2/TRMT1/LCMT2/TRUB1/DUS3L/THUMPD3/TYW3/THG1L/QTRT2/ADAT3/ELP5/TRMT5/PUS3
GOBP	REGULATION OF MIRNA METABOLIC PROCESS	10	0.78871	1.90466	0.000498282	0.00450533	0.00314704	2093	tags=40%, list=10%, signal=36%	ZC3H12A/PNPT1/NFKB1/HRAS
GOBP	PROTEIN LOCALIZATION TO CILIUM	58	-0.467557	-1.82891	0.000497814	0.00450533	0.00314704	4701	tags=50%, list=23%, signal=39%	INPP5E/TBC1D32/BBIP1/ARL6/ZDHHC3/SPATA7/ROPN1/RABEP1/FAM149B1/NPHP4/TCTN1/EFCAB7/BBS9/TTC21B/DZIP1L/DYNC2H1/DZIP1/TULP3/TUB/CSNK1D/ARL3/BBS1/CROCC/RAB11FIP3/IFT122/WDR35/LZTFL1/WDR19/ZNF423
GOBP	RESPONSE TO HEAT	152	0.375512	1.58621	0.000484781	0.00439508	0.00307004	4816	tags=43%, list=23%, signal=34%	EIF2B2/DNAJB6/VCP/RPA3/EIF2S1/DNAJA2/CXCL10/ATP2A2/NUP37/IRAK1/NUP210/HSBP1/NUP88/CLPB/IER5/BAG3/LYN/HMOX1/HSPA8/CDKN1A/HSPH1/PDCD6/NUP50/HIKESHI/DNAJB1/POLR2D/EIF2B1/RAE1/SEC13/DNAJC7/TFEC/EIF2B4/CHORDC1/NUP155/HDAC2/DNAJA3/TRPV3/MICB/NDC1/MLST8/HTRA2/DNAJC2/NUP188/NUP85/GCLC/PTGES3/FKBP4/EIF2B5/DAXX/MAPKAPK2/NUP205/EIF2B3/NUP58/MTOR/NUP107/NUP93/ATR/POM121/RPA1/NUP160/AKT1S1/DNAJA1/NUP35/MAPK3/…
GOBP	POSITIVE REGULATION OF MONONUCLEAR CELL MIGRATION	61	0.483436	1.77419	0.000482941	0.00438432	0.00306252	3874	tags=48%, list=19%, signal=39%	WNT5A/CCL20/C1QBP/S100A7/PYCARD/CCR7/CXCL13/CXCL10/CCL4/ADAM17/S100A14/DEFB124/ITGA4/LGALS9/CCL7/CXCL17/DOCK8/OXSR1/ADAM10/ADAM8/FADD/CCL5/TNF/XCL1/CCR1/CCR2/LGMN/TMEM102/SERPINE1
GOBP	IMP BIOSYNTHETIC PROCESS	10	0.790261	1.90841	0.000482078	0.00438241	0.00306118	1143	tags=50%, list=5%, signal=47%	GART/ATIC/HPRT1/AMPD3/ADSL
GOBP	REGULATION OF MUSCLE CONTRACTION	151	-0.34736	-1.58496	0.000480387	0.00437296	0.00305458	2662	tags=26%, list=13%, signal=23%	RGS2/MYL9/ATP2B1/EDN1/F2R/DOCK5/PPP1R12B/DOCK4/TACR1/FGF13/TNNC2/DSG2/ANK2/DSP/BIN1/ARHGAP42/SLC8A1/P2RX1/ORMDL3/MYOCD/KCNMA1/ADRA1A/PRKG1/TNNT1/PLN/AKAP9/TNNC1/ATP1A2/ADRA2A/TNNI2/CASQ2/CNN1/DMD/TPM1/C12orf57/KIT/CAV1/SOD1/ADRB2
GOBP	REGULATION OF LEUKOCYTE DIFFERENTIATION	267	0.335873	1.50363	0.000472185	0.00430413	0.0030065	4929	tags=40%, list=24%, signal=31%	ZC3H12A/NFKBIZ/IRF7/PNP/LTF/GPR68/PRELID1/IL4R/NME1/HMGB3/PLA2G3/CD83/PPARGC1B/VNN1/IL20/PTPN2/IRF1/PRDM1/CD2/SASH3/CEBPB/RHOH/AP3D1/JAK3/IFNG/MYC/LYN/SOCS1/HAX1/CBFB/SLAMF8/IL12B/XRCC6/FANCD2/ZC3H8/SYK/IKZF3/IL7R/LGALS9/CCL19/CD27/AP3B1/IL23A/LAG3/PRKDC/IL2RA/PGLYRP2/GPR137B/CASP8/ADAM8/FADD/LILRB4/TMEM64/TNFSF9/CD86/CRTAM/TMEM131L/HCLS1/TNF/LEF1/IL36B/NFKBID/TREM2/RB1/IL1RL2/PGLYRP3/CCR1/ANXA1/…
GOMF	TRANSMEMBRANE RECEPTOR PROTEIN TYROSINE KINASE ACTIVITY	61	-0.45451	-1.77665	0.000469891	0.00428903	0.00299595	4635	tags=57%, list=22%, signal=45%	EPHA7/FLT1/MST1R/CSF1R/EPHB3/DDR1/FGFRL1/TEK/CRIM1/KDR/NRP1/EFNA3/FGFR3/EFNB3/ERBB3/ERBB4/PDGFRB/MERTK/DDR2/INSR/IGF1R/EPHB6/MET/EGFR/PDGFRL/FGFR2/EFNA4/NTRK2/FGFR1/ROR2/EPHB1/EFEMP1/AXL/PDGFRA/KIT
GOBP	EMBRYONIC DIGIT MORPHOGENESIS	51	-0.486729	-1.84991	0.00046878	0.00428471	0.00299294	4466	tags=51%, list=21%, signal=40%	MSX1/TBC1D32/LRP5/C2CD3/BPNT2/FREM2/IFT52/BMP4/TBX3/ECE1/NOG/TWIST1/LNPK/MAP3K20/TULP3/CREBBP/BMPR1A/ROR2/HOXA11/WDPCP/OSR1/ZBTB16/GLI2/LRP4/GLI3/OSR2
GOBP	MIDDLE EAR MORPHOGENESIS	17	-0.678749	-1.96733	0.000468359	0.00428471	0.00299294	4986	tags=71%, list=24%, signal=54%	NKX3-2/TBX1/MSX1/PRKRA/INSIG1/PRRX1/EDN1/NOG/TSHZ1/OSR1/RPL38/OSR2
GOBP	DEOXYRIBONUCLEOTIDE METABOLIC PROCESS	39	0.544136	1.82521	0.000467941	0.00428471	0.00299294	1988	tags=36%, list=10%, signal=33%	TYMP/RRM2/UPP1/NUDT15/TYMS/CMPK2/DTYMK/TDG/XDH/ADK/RRM1/DCTPP1/SMUG1/NUDT1
GOBP	EAR DEVELOPMENT	195	-0.315928	-1.48356	0.000466757	0.00428371	0.00299224	4040	tags=31%, list=19%, signal=25%	TGFB2/KCNK2/BMP2/PJVK/IFT27/PRRX1/TRIOBP/FREM2/MAFB/LIN7A/ATP6V1B1/BMP4/ADGRV1/HES1/PDGFRB/TFAP2A/JAG1/AHI1/ECE1/EDN1/NOG/DVL2/FZD3/ROR1/TSKU/JAG2/LGR5/TWIST1/FGFR2/SEC24B/CXCL14/SLC25A27/SOBP/ROR2/FRZB/NTN1/TSHZ1/MYCL/MAF/RBPJ/LRIG1/MAPK1/LRIG3/SDC4/WDPCP/GATA2/OSR1/RPL38/DCHS1/ANP32B/MCOLN3/WDR19/SLITRK6/GLI2/GLI3/SPRY2/BCL2/OSR2/SOD1/GATA3
GOBP	REGULATION OF MITOCHONDRION ORGANIZATION	148	0.392073	1.64888	0.000463277	0.00425758	0.00297399	3775	tags=38%, list=18%, signal=31%	TFDP1/PPIF/SLC25A5/GZMB/FZD5/PRELID1/GHITM/TIGAR/FAM162A/PYCARD/BAK1/HIF1A/NMT1/BIK/YWHAQ/MMP9/TNFSF10/SFN/CYRIB/MARCHF5/SIRT7/BID/HAX1/PDCD5/GPX1/PRMT6/STAT2/PLAUR/TFRC/CASP8/VDAC1/BNIP3/TMEM14A/BOK/TP63/TRIAP1/YWHAZ/PARK7/SREBF2/TREM2/MFF/BAX/FXN/HTRA2/MIEF1/TSPO/PSMD10/ZDHHC6/HIP1R/MYO19/CIDEB/HTT/TMEM102/MAPK8/SREBF1/GSK3A
GOBP	SNRNA TRANSCRIPTION	74	0.464281	1.75039	0.000462505	0.00425632	0.00297311	4345	tags=41%, list=21%, signal=32%	NABP1/POLR2H/ELL2/NCBP1/POLR2F/ZC3H8/INTS13/GTF2A2/POLR2L/GTF2E2/TAF13/POLR2G/POLR2D/ELL/INTS7/CDK7/POLR2E/GTF2E1/INTS5/TAF11/INTS9/CDK9/GTF2B/INTS14/POLR2I/NABP2/RPRD1B/CCNK/POLR2J/TAF5
GOBP	PSEUDOURIDINE SYNTHESIS	18	0.690076	1.95695	0.000461582	0.00425364	0.00297124	4523	tags=83%, list=22%, signal=65%	NHP2/NOP10/TRUB2/PUSL1/PUS10/PUS1/GAR1/PUS7/DKC1/RPUSD1/TRUB1/TSR3/RPUSD2/PUS3/RPUSD3
GOMF	CCR CHEMOKINE RECEPTOR BINDING	30	0.602547	1.90106	0.000459239	0.00423786	0.00296022	3438	tags=57%, list=16%, signal=47%	CCL20/CXCL13/CNIH4/CCL18/CCL4/CCL22/CCL2/CCL8/NARS1/CCL7/CCL19/CCL5/NES/XCL1/CCRL2/CCR2/CCL17
GOBP	SPINAL CORD DEVELOPMENT	94	-0.39865	-1.70476	0.000457296	0.00422574	0.00295175	3432	tags=27%, list=16%, signal=22%	PTBP2/IFT172/RELN/TCTN1/LMO4/SOX13/SOX4/DYNC2H1/NOG/ZC4H2/TULP3/PTPRS/HOXC10/GDF7/PKD2/PTN/ADARB1/VIT/GATA2/PTCH1/DAAM2/PKD1/GLI2/GLI3/SOX6
GOBP	NEGATIVE REGULATION OF DEVELOPMENTAL GROWTH	98	-0.396267	-1.70386	0.000450571	0.00416933	0.00291235	3748	tags=40%, list=18%, signal=33%	MSTN/WWC3/SAV1/SOCS2/SEMA6D/PTEN/VGLL4/NRP1/FGFR3/RAI1/BMP4/JARID2/RTN4R/RGS2/SEMA3E/NKD1/STK3/NOG/SPART/SEMA4G/SEMA6A/ADRB1/DUSP10/FGF13/SEMA3B/RYK/PTPRS/PPARA/RBP4/MAP2/NTN1/CDKN1B/RTN4/TGFBR2/PTCH1/SEMA3G/BBS2/MEIS1/ADRB2
GOBP	POSITIVE REGULATION OF CELL SUBSTRATE JUNCTION ORGANIZATION	30	-0.584964	-1.98265	0.00044452	0.00411901	0.0028772	4390	tags=57%, list=21%, signal=45%	MAPRE2/TEK/KDR/NRP1/IQSEC1/ABL1/S100A10/DUSP3/FMN1/COL16A1/IQGAP1/SMAD3/FERMT2/SDC4/MYOC/TSC1/PIK3R1
GOBP	TRNA TRANSPORT	35	0.568665	1.88323	0.000444398	0.00411901	0.0028772	4816	tags=63%, list=23%, signal=48%	RAN/NUP37/NUP210/NUP88/NUP50/XPOT/NOL6/RAE1/SEC13/NUP155/NDC1/YBX1/NUP188/NUP85/NUP205/NUP58/NUP107/NUP93/POM121/NUP160/NUP35/NUP42
GOBP	NATURAL KILLER CELL ACTIVATION INVOLVED IN IMMUNE RESPONSE	29	0.611496	1.91889	0.000441561	0.00410291	0.00286595	5627	tags=48%, list=27%, signal=35%	RAB27A/CORO1A/IL12B/PGLYRP2/VAMP7/PGLYRP3/HLA-F/CD244/UNC13D/ZNF683/IFNE/IFNA2/IFNK/IFNW1
GOBP	NEGATIVE REGULATION OF LYMPHOCYTE ACTIVATION	143	0.393791	1.64745	0.000440488	0.00409861	0.00286295	4262	tags=38%, list=20%, signal=30%	ZC3H12A/CD274/IL4R/TNFRSF21/HMGB3/IDO1/PTPN2/IRF1/PLA2G2F/SAMSN1/ARG1/CEBPB/JAK3/LYN/SOCS1/CBFB/TIGIT/ZC3H8/GLMN/LGALS9/PTPN22/LAG3/IL2RA/PGLYRP2/LILRB4/LAPTM5/CD86/CRTAM/TMEM131L/SCRIB/SFTPD/XCL1/PGLYRP3/CLEC4G/ANXA1/PELI1/CASP3/TYROBP/TNFRSF13B/LILRB2/PAG1/HLA-F/TBC1D10C/MNDA/LILRB1/HLA-G/CD300A/CD80/IL10/FOXP3/FGR/PARP3/LST1/CR1
GOCC	CILIARY TRANSITION ZONE	68	-0.438435	-1.75843	0.000436451	0.00406668	0.00284064	5478	tags=49%, list=26%, signal=36%	UNC119B/CCDC66/CEP290/IFT140/TOPORS/NPHP1/TMEM216/CDKL1/KIF17/CFAP36/DYNC2LI1/SPATA7/KIAA1549/IFT52/NPHP4/SEPTIN2/TCTN1/BBS9/LCA5/AHI1/IQCB1/CFAP410/CPLANE1/TRAF3IP1/MACIR/TMEM80/CIBAR1/ARL3/PCM1/TTBK2/IFT122/WDR19/CCSAP
GOMF	STRUCTURAL CONSTITUENT OF RIBOSOME	153	0.385507	1.62876	0.000432724	0.00403756	0.0028203	2788	tags=36%, list=13%, signal=31%	MRPL15/MRPL51/RPL26L1/MRPL35/MRPS11/MRPS7/MRPL47/MRPL13/MRPS16/MRPS15/MRPL46/MRPS12/MRPL37/MRPS17/MRPL3/MRPL27/MRPL36/RPL22L1/MRPL11/MRPL17/MRPL42/MRPS25/NDUFA7/MRPL52/MRPL32/MRPL14/MRPS21/MRPS22/MRPS14/MRPL20/MRPS33/MRPL54/MRPS18C/MRPL19/MRPL4/MRPL16/MRPL22/MRPS36/MRPL12/MRPL21/MRPL41/MRPL23/MRPL28/MRPS2/MRPS35/MRPS6/MRPL18/MRPS30/MRPL55/MRPL57/MRPS18A/MRPS23/MRPS34/RPL39L/MRPL34
GOBP	INTERLEUKIN 17 PRODUCTION	35	0.56899	1.88431	0.000429708	0.00401499	0.00280453	1898	tags=31%, list=9%, signal=29%	NOD2/MYD88/IL36RN/PRKCQ/PHB/TUSC2/SLC7A5/IFNG/IL12B/IL6/IL23A
GOBP	REGULATION OF WNT SIGNALING PATHWAY	347	-0.277866	-1.40924	0.000428899	0.00401301	0.00280315	3828	tags=33%, list=18%, signal=28%	APC/PPM1B/EDA/CBY1/ILK/GNAQ/PRKN/BTRC/JRK/VGLL4/TNN/WNT5B/SFRP5/LGR4/RNF220/LGR6/NPHP4/PRICKLE1/APP/ABL1/DAB2/DACT3/PTPRU/RSPO3/SOX10/RNF43/LRRK2/MLLT3/SOX13/SOX4/WWTR1/RECK/YAP1/NKD1/MACF1/STK3/WNK1/NOG/DVL2/DACT1/DKK1/TSKU/ARNTL/LGR5/ESR1/HIC1/LATS2/ZBED3/EGF/EGFR/FZD7/ADGRA2/DDIT3/DKK3/GPRC5B/APOE/KLHL12/CSNK1D/LRP6/APCDD1/RNF146/FGFR2/GREM1/SMURF2/ANKRD6/CDC73/USP34/CAPRIN2/GSK3B/CCNY/ROR2/GP…
GOBP	PROTEIN IMPORT INTO MITOCHONDRIAL MATRIX	17	0.697527	1.94628	0.000422217	0.00395601	0.00276333	4029	tags=82%, list=19%, signal=67%	GRPEL1/TIMM50/TIMM17A/TIMM23/TOMM40L/TOMM40/ROMO1/DNAJC15/TIMM44/TIMM21/GRPEL2/DNLZ/TIMM17B/DNAJC19
GOBP	TELOMERE MAINTENANCE VIA TELOMERE LENGTHENING	75	0.461418	1.74295	0.000420791	0.00394814	0.00275784	4208	tags=45%, list=20%, signal=36%	PRKCQ/AURKB/CCT5/NEK2/NHP2/RAD51/CCT2/HNRNPA2B1/CCT3/NOP10/HNRNPC/CCT7/STN1/PINX1/PNKP/XRCC5/PIF1/GAR1/TCP1/DKC1/FBXO4/CCT6A/NAT10/CCT8/PARP1/TINF2/TELO2/GNL3L/PTGES3/RAD50/ATR/MAPKAPK5/WRAP53/RPA1
GOBP	TRANSCRIPTION BY RNA POLYMERASE I	67	0.484142	1.79963	0.000417554	0.00392325	0.00274046	5250	tags=54%, list=25%, signal=40%	MACROH2A1/IPPK/POLR2H/POLR2F/MARS1/ZMPSTE24/SIRT7/POLR1H/PIH1D1/LYAR/POLR2L/POLR1C/TAF1D/BNC1/DHX33/POLR1B/ATF4/MACROH2A2/CDK7/UTP15/POLR2E/POLR1G/SMARCA4/CCNH/NOL11/HEATR1/POLR1A/MTOR/PWP1/TAF1B/NCL/MAPK3/TCOF1/GTF2H1/ERCC6/WDR75
GOCC	PRECATALYTIC SPLICEOSOME	52	0.516285	1.85044	0.000417554	0.00392325	0.00274046	2761	tags=40%, list=13%, signal=35%	SNRPG/SNRPF/SNRPD1/LSM2/TXNL4A/SF3B3/LSM7/SNRPD3/EFTUD2/SF3B5/SNU13/SNRPA1/MAGOHB/SF3B6/LSM5/LSM4/SNRPB/PRPF31/PRPF38A/LSM6/PRPF4
GOBP	RESPONSE TO GAMMA RADIATION	52	0.516544	1.85136	0.000417554	0.00392325	0.00274046	4406	tags=60%, list=21%, signal=47%	H2AX/TIGAR/POLB/BAK1/RAD51/HSPA5/CXCL10/ZMPSTE24/MYC/CDKN1A/XRCC6/FANCD2/GPX1/XRCC5/CCL7/BRCA2/HRAS/PRKDC/CHEK2/LIG4/MEN1/PML/BAX/PARP1/MDM2/KDM1A/DCUN1D3/ELK1/ATR/TLK2/PTPRC
GOBP	NEGATIVE REGULATION OF EXTRINSIC APOPTOTIC SIGNALING PATHWAY VIA DEATH DOMAIN RECEPTORS	38	0.556399	1.86365	0.000415687	0.00392217	0.0027397	4079	tags=47%, list=20%, signal=38%	CFLAR/TNFSF10/FAIM/HMOX1/GPX1/TNFRSF10A/CASP8/TNFRSF10B/FADD/HMGB2/PARK7/BRCA1/FASLG/TRADD/ICAM1/ITPRIP/SERPINE1/TRAF2
GOBP	EPIDERMIS DEVELOPMENT	371	0.313726	1.443	0.000414411	0.00391563	0.00273513	3288	tags=25%, list=16%, signal=22%	KRT16/DSC2/PI3/KRT6A/HPSE/KLK13/DSG3/FABP5/SERPINB13/LCE3D/TGM1/SPRR1B/CDH3/WNT5A/EPHA2/ZDHHC21/TFDP1/SPRR3/KRT6B/CERS3/PPARD/CNFN/CRABP2/S100A7/SPRR1A/IVL/HDAC1/MACROH2A1/GRHL3/ABCA12/PRKCH/TGM3/EZH2/KRT17/TMEM79/FERMT1/ST14/CSTA/TRIM16/ZBED2/IL20/ATP2A2/SPRR2G/BCR/SFN/CTSL/ZMPSTE24/CYP27B1/CBFB/CAPN1/KRTDAP/PRSS8/KLK12/SULT2B1/KLK7/AP3B1/NSUN2/PCSK6/TRPC4AP/OVOL2/KRT24/OVOL1/ZFP36/BNC1/SLC9A3R1…
GOBP	ANIMAL ORGAN FORMATION	59	-0.464715	-1.81002	0.000412354	0.00390168	0.00272539	3262	tags=37%, list=16%, signal=32%	FGF1/BMP4/ROBO2/HES1/NOG/NTF4/DKK1/FGFR2/BMPR1A/MEF2C/HOXA11/WNT2/RBPJ/MAPK1/TGFBR2/BMP7/SPRY1/GLI2/AR/GLI3/WNT2B/AXIN2
GOCC	CELL CELL JUNCTION	471	-0.261729	-1.36113	0.00041087	0.00389312	0.00271941	4764	tags=33%, list=23%, signal=26%	PERP/PDLIM2/FLOT1/PIP5K1C/CDC42BPB/DSC1/SCN1B/SYNPO/AKAP6/PAK2/POF1B/FGFRL1/TEK/AQP7/CCDC85B/GJB5/SHROOM4/TMEM65/FLRT2/CTNNB1/TRPC6/CLDN15/OBSL1/KRT8/PCDH12/MAGI3/CDHR3/RAP1B/APC/PIK3CA/SAV1/ARHGEF2/CADM1/NFASC/RDX/PIKFYVE/NECTIN3/TMEM204/VCL/KLHL24/LIN7A/KRT18/CGN/DSG1/IGSF11/PKN2/NPHP4/MXRA8/CLIC4/MPDZ/PXN/DLG1/APP/PACSIN2/PTPRK/ITGA5/JCAD/ANKRD23/WASF2/ABCB4/HEPACAM/CLDN3/PTPRU/JAM2/JAG1/AHI1/…
GOBP	REGULATION OF TRANSCRIPTION BY RNA POLYMERASE I	33	0.591387	1.9225	0.000408096	0.0038723	0.00270487	4534	tags=58%, list=22%, signal=45%	MACROH2A1/IPPK/MARS1/ZMPSTE24/SIRT7/PIH1D1/LYAR/POLR2L/BNC1/DHX33/ATF4/MACROH2A2/UTP15/SMARCA4/NOL11/HEATR1/MTOR/PWP1/NCL
GOBP	POSITIVE REGULATION OF TRANSCRIPTION BY RNA POLYMERASE I	23	0.646468	1.91874	0.000407138	0.00386868	0.00270233	4534	tags=61%, list=22%, signal=48%	IPPK/MARS1/PIH1D1/LYAR/BNC1/DHX33/ATF4/UTP15/SMARCA4/NOL11/HEATR1/MTOR/PWP1/NCL
GOBP	REGULATION OF CARDIOCYTE DIFFERENTIATION	26	-0.613436	-1.99961	0.000402925	0.00383407	0.00267816	5282	tags=65%, list=25%, signal=49%	DLL1/SMAD4/DHX36/KAT2A/TGFB2/BMP2/GPER1/PRICKLE1/BMP4/DKK1/EGFR/FZD7/GREM1/MEF2C/MYOCD/SOX6/EFNB2
GOBP	MUSCLE FILAMENT SLIDING	39	-0.521788	-1.88051	0.000399985	0.00381148	0.00266238	2095	tags=33%, list=10%, signal=30%	ACTC1/ACTA1/MYH3/TNNC2/TNNT1/TPM2/TNNC1/VIM/DES/TNNI2/DMD/TPM1/TMOD1
GOBP	RIBONUCLEOSIDE MONOPHOSPHATE METABOLIC PROCESS	56	0.508394	1.84672	0.000398956	0.00380709	0.00265931	3901	tags=41%, list=19%, signal=33%	UPP1/UCK2/AK2/GART/TJP2/APRT/ATIC/IMPDH1/NT5C2/HPRT1/AMPD3/ADSL/XDH/AK1/ADK/UMPS/GMPS/CASK/RFK/CARD11/CAD/GMPR2/PRPS2
GOBP	ADENYLATE CYCLASE ACTIVATING ADRENERGIC RECEPTOR SIGNALING PATHWAY	24	-0.621815	-1.96929	0.000398775	0.00380709	0.00265931	2089	tags=38%, list=10%, signal=34%	ADCY9/ADRB1/AKAP13/ADRA1A/ATP2B4/RAPGEF2/PLN/ADRA2A/ADRB2
GOBP	POSITIVE REGULATION OF ALPHA BETA T CELL DIFFERENTIATION	46	0.522816	1.81741	0.000390272	0.00373482	0.00260883	3986	tags=54%, list=19%, signal=44%	NFKBIZ/PNP/IL4R/CD83/SASH3/AP3D1/IFNG/SOCS1/CBFB/IL12B/SYK/LGALS9/CCL19/AP3B1/IL23A/LILRB4/CD86/NFKBID/ANXA1/HLA-DRA/IL12RB1/ZAP70/NLRP3/CD80/FOXP3
GOBP	SMALL GTPASE MEDIATED SIGNAL TRANSDUCTION	491	-0.255505	-1.33742	0.000386749	0.00370639	0.00258897	3722	tags=28%, list=18%, signal=23%	PLD1/SQSTM1/LPAR4/ALS2/SOS1/ARHGEF2/RALGDS/MADD/RDX/NRP1/PPP2CB/RAP1A/IQSEC1/RELN/GNA12/TIAM2/GNA13/RIPOR1/RABL3/RAB30/SRGAP3/ABL1/SOS2/DENND3/RASA4/SHC3/PDGFRB/KITLG/SHOC2/WASF2/PRKD1/ARHGEF1/GNB1/ARHGAP24/RAB33B/RTN4R/ARHGAP10/RASA3/KSR1/CYTH3/NET1/ERBIN/HACD3/AMOT/NGEF/BRAP/SYDE1/SLIT2/CHML/MRAS/F2R/ZNF304/DOCK5/DOCK4/FBXO8/AUTS2/RHOBTB1/RAPGEF3/RHOQ/MET/ARHGAP20/A2M/GARRE1/ARHGEF6/SHC2/TRIO/R…
GOBP	RIBONUCLEOPROTEIN COMPLEX SUBUNIT ORGANIZATION	189	0.366317	1.58069	0.000386409	0.00370639	0.00258897	2748	tags=30%, list=13%, signal=26%	RUVBL1/MRPS11/MRPS7/MCTS1/EIF2S2/VCP/RUVBL2/SNRPG/EIF6/EIF3J/SNRPF/SNRPD1/NCBP1/SRSF9/PRMT5/LSM2/NOP2/TXNL4A/DDX28/TARBP2/EIF3I/FASTKD2/CPSF6/MRTO4/SNRPD3/WDR77/CD2BP2/MRPL20/GEMIN6/SNRPC/GEMIN7/DENR/EIF3K/PIH1D1/PPAN/LSM4/XRCC5/BOP1/SNRPB/ADAR/SRPK1/TRAF7/PRKDC/EIF3B/LUC7L2/RPF2/POLR2D/PRPF31/EIF4H/RRP7A/SRSF1/USP39/SHQ1/STRAP/ABT1/ISY1/CLP1
GOCC	SPINDLE MIDZONE	36	0.563932	1.87018	0.000385636	0.0037063	0.00258891	1894	tags=36%, list=9%, signal=33%	AURKB/KIF18B/PRC1/AURKA/CDC6/KIF14/CDCA8/CENPE/RACGAP1/KIF18A/PLK1/KIF20B/RCC2
GOBP	GLUCOSE 6 PHOSPHATE METABOLIC PROCESS	24	0.650522	1.96018	0.000382836	0.00368466	0.0025738	5106	tags=71%, list=24%, signal=54%	PGAM1/PGM2/HK2/TIGAR/PGD/TALDO1/GPI/RBKS/SHPK/PGLS/G6PD/DERA/G6PC1/TKT/HK3/RPE/G6PC2
GOBP	BODY MORPHOGENESIS	44	-0.515541	-1.89619	0.00038141	0.0036762	0.00256789	5323	tags=61%, list=26%, signal=46%	PTPN11/MAB21L2/ZNF281/EP300/TBX1/MSX1/PHLDB2/TIPARP/MMP2/GNAS/CRISPLD1/CLASP1/NOG/CLDN5/MYH3/RRAS/LRP6/GPC3/PHLDB1/DAG1/SKI/IFT122/RAB3GAP1/PLEKHA1/PDGFRA/CDON/GREM2
GOBP	POSITIVE REGULATION OF CYTOKINE PRODUCTION INVOLVED IN IMMUNE RESPONSE	50	0.522423	1.86501	0.000376027	0.00362953	0.00253528	4079	tags=50%, list=20%, signal=40%	WNT5A/NOD2/FZD5/CLEC7A/RSAD2/SLC7A5/SASH3/IL1B/SEMA7A/NR4A3/IL6/CD36/FFAR2/LAPTM5/HLA-E/DDX21/XCL1/DDX58/BCL10/B2M/HLA-F/LILRB1/NLRP3/HLA-G/TRAF2
GOBP	AORTA MORPHOGENESIS	29	-0.590081	-1.96982	0.000375476	0.00362942	0.00253521	4986	tags=55%, list=24%, signal=42%	TBX1/LRP1/HEY1/NPRL3/TGFB2/EFEMP2/HES1/PDGFRB/JAG1/SOX4/ACVRL1/SEC24B/BMPR1A/RBPJ/TFAP2B/MYLK
GOBP	DNA STRAND ELONGATION	26	0.635522	1.94724	0.000372466	0.00360551	0.00251851	3666	tags=54%, list=18%, signal=44%	GINS3/PCNA/GINS2/MCM4/GINS1/POLE3/POLD2/MCM7/MCM3/DNA2/RFC3/RFC4/POLD3/RAD50
GOBP	TISSUE MIGRATION	299	-0.294484	-1.45914	0.000372178	0.00360551	0.00251851	3677	tags=34%, list=18%, signal=29%	PIK3CA/SCARB1/TACSTD2/MAP2K5/TNFSF12/PTEN/FOXC2/FSTL1/NRP1/CYP1B1/PRKCE/PLXND1/IQSEC1/VEGFC/TAC1/FGF1/PKN2/EGR3/PKN1/PXN/SIRT1/ABL1/BMP4/SRPX2/JCAD/SMOC2/AGT/PRKD1/RGCC/BCAS3/TMSB4X/AMOT/CLASP1/PTPRM/STAT5A/EDN1/CLEC14A/MACF1/SLIT2/CCN3/SPRED1/PRKCA/SVBP/DOCK5/MMRN2/MET/ACTC1/EFNA1/DUSP10/PPARG/ACTA1/EGF/SASH1/KRT2/RRAS/ACVRL1/ADGRA2/TESK1/SYNJ2BP/APOE/PTK2/PIK3CB/PFN2/GREM1/MECP2/ZEB2/PLEKHG5/RH…
GOBP	POSITIVE REGULATION OF BMP SIGNALING PATHWAY	32	-0.556242	-1.90249	0.000371736	0.00360551	0.00251851	3069	tags=53%, list=15%, signal=45%	CCN1/SOX11/SMAD2/SMAD4/CDH5/MSX1/BMP4/HES1/ACVRL1/NUMA1/GPC3/NEO1/RBPJ/FOXD1/ELAPOR2/ZNF423/NOTCH2
GOCC	NEURON TO NEURON SYNAPSE	335	-0.285771	-1.43931	0.000369251	0.00358991	0.00250761	4908	tags=32%, list=24%, signal=25%	GRIN2D/ARHGEF9/LZTS3/GRIA2/SEMA4C/GRID1/RPS18/PDPK1/ITPR1/SYNPO/PAK2/CAP2/DVL1/PSD3/ARHGAP44/INPP4A/PCLO/GPHN/TANC1/TNIK/PRR12/RAPGEF4/GRIP1/LRRC4C/RNF112/GPER1/DMTN/SOS1/GRIN3A/CHRM1/MIB1/NOS1/SHANK2/SPOCK1/NECTIN3/LIN7A/IQSEC1/EFNB3/ZDHHC2/SYT1/IGSF11/RPS25/MPDZ/ERBB4/DLG1/PCBP2/PRRT2/KCND2/STXBP5/GOPC/PDLIM5/NPTN/RPS27/CLSTN1/NLGN1/SYN2/ADD1/RPL12/ND2/ZDHHC15/DYNLL2/SHANK3/SYNJ2BP/RNF19A/PTPRS…
GOBP	NEGATIVE REGULATION OF INTRINSIC APOPTOTIC SIGNALING PATHWAY	90	0.43539	1.69827	0.000367301	0.00357613	0.00249798	4159	tags=39%, list=20%, signal=31%	ENO1/PPIF/HDAC1/HIF1A/NDUFA13/MMP9/VNN1/PPIA/DDIAS/NDUFS3/VDAC2/TRAP1/MIF/FIGNL1/BID/BCL2L12/GPX1/SOD2/HYOU1/ARMC10/NOC2L/PLAUR/BDKRB2/TRIAP1/PARK7/TMEM161A/ING2/HTRA2/MDM2/KDM1A/MCL1/CDKN2D/MAPK7/XBP1/EPO
GOBP	CELLULAR COMPONENT ASSEMBLY INVOLVED IN MORPHOGENESIS	96	-0.396061	-1.70504	0.000367231	0.00357613	0.00249798	3516	tags=39%, list=17%, signal=32%	TNNT3/CASQ1/ABCA2/CD9/PHLDB2/OBSL1/KRT8/CAPN3/PIKFYVE/KRT19/PDGFRB/GPC1/CLASP1/EDN1/ACTC1/TMOD2/ACTA1/MYH3/GNPAT/PHLDB1/DAG1/AKAP13/FHOD3/CFL2/TNNT1/PAFAH1B1/CSRP1/NEBL/PDGFRA/LMOD1/MYH11/TPM1/TMOD1/PGM5/PMP22/MEF2A/TPPP
GOBP	REGULATION OF T CELL MEDIATED IMMUNITY	73	0.467569	1.76364	0.000366738	0.00357613	0.00249798	5020	tags=58%, list=24%, signal=44%	NOD2/FZD5/RSAD2/CYRIB/ARG1/SASH3/IL1B/IL12B/IL7R/IL6/RIPK3/IL23A/FADD/LILRB4/HLA-E/TNFRSF1B/HSPD1/XCL1/KLRD1/CD1B/CLEC4G/HLA-DRA/IL12RB1/CCR2/B2M/HLA-F/WAS/HLA-B/LILRB1/NECTIN2/NLRP3/HLA-G/FOXP3/TRAF2/FBXO38/CD1D/PTPRC/MALT1/AGER/TBX21/IFNA2/HLA-A
GOBP	MRNA TRANSPORT	140	0.392823	1.63391	0.000365844	0.00357613	0.00249798	4158	tags=41%, list=20%, signal=33%	EIF4A3/DDX39A/EIF4E/HNRNPA2B1/NCBP1/SRSF9/NUP37/NUP210/NUP88/MX2/CPSF3/ALYREF/MAGOHB/NUP50/SARNP/NSUN2/SRSF2/NXT1/ZFP36/CETN2/POLR2D/RAE1/NCBP3/MVP/SRSF7/SEC13/SRSF1/THOC5/IWS1/NUP155/IGF2BP3/THOC6/THOC7/NDC1/CPSF4/GLE1/MAGOH/NUP188/DDX19A/WDR33/NUP85/FYTTD1/ARC/CHTOP/NUP205/NUTF2/EIF5A/AGFG1/UPF1/ENY2/NUP58/LRPPRC/NUP107/NUP93/SRSF3/IGF2BP1/POM121
GOBP	POSITIVE REGULATION OF RESPONSE TO CYTOKINE STIMULUS	52	0.518855	1.85965	0.000361414	0.00353932	0.00247227	3342	tags=40%, list=16%, signal=34%	IRF7/WNT5A/PARP9/CXCR4/CASP4/IFIH1/CASP1/HIF1A/MMP12/PARP14/ADAM17/TLR2/IKBKE/TBK1/NLRC5/FADD/LAPTM5/TSLP/TREM2/DDX58/CPNE1
GOBP	CARDIAC EPITHELIAL TO MESENCHYMAL TRANSITION	30	-0.590715	-2.00214	0.000356169	0.00349306	0.00243996	4512	tags=57%, list=22%, signal=44%	SMAD4/HEY1/MSX1/TMEM100/TGFB2/BMP2/JAG1/NOG/EFNA1/TWIST1/WNT2/RTN4/RBPJ/TGFBR2/PDCD4/SPRY1/TGFBR3
GOBP	ATP BIOSYNTHETIC PROCESS	50	0.523796	1.86991	0.000351445	0.00345177	0.00241112	3460	tags=48%, list=17%, signal=40%	ENO1/ATP5MF/VCP/ATP5MC3/ATP5PF/ATP5F1B/STOML2/ATP5MC1/ATP5PB/ALDOA/SLC25A13/ATP5ME/ATP5MG/ATP5F1C/UQCC3/ATP5PO/ATP6V1A/ANTKMT/TREM2/PKM/ATP5F1D/PARP1/ATP5F1A/ATP5PD
GOBP	INTERLEUKIN 2 PRODUCTION	59	0.493858	1.80391	0.000349024	0.003433	0.00239801	4438	tags=54%, list=21%, signal=43%	NOD2/PNP/CLEC7A/PRKCQ/CD83/STOML2/GBP1/SASH3/IL1B/GLMN/ZFP36/LAG3/LILRB4/LAPTM5/HOMER3/CD86/SFTPD/CARD9/XCL1/CD3E/ANXA1/CCR2/CARD11/CD80/FOXP3/IL17F/NAV3/TRAF2/CR1/PTPRC/CD28/MALT1
GOBP	ESTABLISHMENT OF PROTEIN LOCALIZATION TO CHROMOSOME	27	0.622254	1.93355	0.000347534	0.00342337	0.00239128	4190	tags=67%, list=20%, signal=53%	CCT5/MACROH2A1/RUVBL2/CCT2/CCT3/CCT7/PIH1D1/BRCA2/LRWD1/TCP1/MACROH2A2/DKC1/NIPBL/CCT6A/CCT8/NABP2/ATR/WRAP53
GOBP	ANTIGEN PROCESSING AND PRESENTATION OF PEPTIDE OR POLYSACCHARIDE ANTIGEN VIA MHC CLASS II	99	0.425191	1.68972	0.000347447	0.00342337	0.00239128	5007	tags=45%, list=24%, signal=35%	AP2S1/KIF2C/PYCARD/KIF4A/KIF2A/KIF11/IFI30/CENPE/KIF23/CTSL/RACGAP1/AP1S3/KIF15/KIF18A/ACTR1A/AP1M2/CAPZA1/DYNLL1/SEC24C/CTSD/LAG3/HLA-DMB/CTSS/HLA-DOB/SEC13/KIF22/DCTN5/DCTN6/CANX/AP1B1/TREM2/CLTA/HLA-DRA/LGMN/MARCHF1/DCTN2/KIFAP3/AP2M1/DNM2/HLA-DOA/DCTN3/FCER1G/HLA-DMA/HLA-DQB1/SEC24A
GOBP	POSITIVE REGULATION OF CD4 POSITIVE ALPHA BETA T CELL DIFFERENTIATION	30	0.607924	1.91803	0.000343694	0.0033955	0.00237181	4438	tags=63%, list=21%, signal=50%	NFKBIZ/IL4R/CD83/SASH3/IFNG/SOCS1/IL12B/LGALS9/CCL19/IL23A/CD86/NFKBID/ANXA1/HLA-DRA/IL12RB1/NLRP3/CD80/FOXP3/MALT1
GOBP	BIOLOGICAL PROCESS INVOLVED IN INTERACTION WITH SYMBIONT	84	0.449954	1.73819	0.000339577	0.00335976	0.00234685	3131	tags=35%, list=15%, signal=29%	KRT6A/ZC3H12A/IFI27/LTF/APOL1/HDAC1/PHB/VAPA/CCL4/TUSC2/ARG1/PSMC3/GAPDH/ROMO1/HSPA8/GPX1/CCL8/CXCL6/CAMP/SUGT1/TARDBP/HSPD1/SFTPD/CCL5/LEF1/CFL1/SMARCA4/TAF11/PPIB
GOBP	NUCLEAR TRANSCRIBED MRNA CATABOLIC PROCESS	203	-0.321621	-1.51779	0.000335764	0.00332693	0.00232392	3808	tags=36%, list=18%, signal=30%	UPF2/RPL24/RPS11/RPS5/RPS9/RPL41/SMG6/RPL23A/SMG1/RPS25/RPS15A/TTC37/RPS15/CNOT8/CSDE1/UPF3A/RPL13A/TENT4A/RPL32/RPL7A/DCP1B/RPS27/RPL31/RPL18/EIF4ENIF1/RPL27/RPS8/RPL4/RPL12/RPL9/XRN1/PAN2/EXOSC7/TNRC6B/RPS6/PAN3/RPL13/RPL10A/RPL11/RPL37/ZFP36L1/SAMD4B/TNRC6C/RPL14/RPS4X/RPLP2/RPS14/TUT4/RPLP1/RPL8/GSPT2/RPS17/RPS24/RPL22/RPS23/EIF3E/RBM8A/RPL23/RPL38/CTIF/RPS20/RPL3/SAMD4A/RPL15/RPL34/NBAS/RPS3…
GOBP	RNA MODIFICATION	161	0.380971	1.62223	0.000334937	0.00332365	0.00232162	4577	tags=40%, list=22%, signal=31%	NHP2/APOBEC3B/WDR4/DIMT1/NOP10/MTO1/NOP2/FTSJ1/TRUB2/PUSL1/METTL6/METTL1/HENMT1/HSD17B10/TRMT10C/TFB2M/ELP6/PUS10/DUS1L/TPRKB/RBM47/MOCS3/TYW5/EMG1/NSUN2/PUS1/CMTR2/ADAR/GAR1/TRMT6/TRMT112/JMJD6/METTL8/TRMU/CTU2/PUS7/DKC1/MTFMT/NAT10/OSGEP/RPUSD1/DUS2/MRM2/TRMT1/LCMT2/METTL4/TRUB1/DUS3L/MRM3/THUMPD3/TYW3/FDXACB1/THG1L/ALKBH3/BUD23/TSR3/QTRT2/ADAT3/ELP5/RPUSD2/TRMT5/PUS3/RPUSD3/METTL5
GOBP	CARDIAC MUSCLE CELL PROLIFERATION	46	-0.490943	-1.8332	0.000332661	0.00330594	0.00230925	4040	tags=50%, list=19%, signal=40%	TGFB2/KCNK2/SAV1/PTEN/FOXC2/VGLL4/ERBB4/JARID2/YAP1/NOG/FOXC1/FGFR2/BMPR1A/DIPK2A/MEF2C/RBP4/WNT2/RBPJ/MAPK1/TGFBR2/ZFPM2/MEIS1/TGFBR3
GOMF	SULFUR COMPOUND BINDING	245	-0.313364	-1.51731	0.00032896	0.003274	0.00228694	3955	tags=33%, list=19%, signal=27%	SOAT1/LIPC/METTL17/LTBP2/MSTN/GSTM3/EFEMP2/CHST15/FSTL1/NRP1/ADAMTS5/BMT2/LGR6/APLP2/HMGCL/FGF1/APP/BMP4/CCN2/SMOC2/SULT1A1/ZCCHC4/TENM1/CTSG/ENPP1/THBS2/RSPO3/THBS3/ACBD4/RTN4R/VEGFB/FGFBP3/MGST1/SLIT2/CCN3/ECI2/LXN/PGF/SOD3/FBLN7/METTL3/FGF9/PCOLCE2/SERPINA5/SLIT3/APOE/ALDH6A1/PTPRS/FGFR2/DBT/LPL/TNXB/FN1/PNPLA3/FGFR1/PTPRF/PTN/ECM2/HACL1/PRELP/CCN5/PANK3/RPL22/CD34/CFH/RSPO1/NDNF/LAMC2/BMP7/PT…
GOBP	CELL CHEMOTAXIS	274	0.340637	1.52681	0.000328358	0.00327287	0.00228615	4443	tags=35%, list=21%, signal=28%	S100A12/S100A9/CXCR2/C10orf99/WNT5A/NOD2/S100A8/EPHA2/TPBG/CCL20/CXCR4/C1QBP/S100A7/PRKCQ/ABCC1/CCR7/CXCL1/CXCL13/CXCL2/CYP7B1/GSTP1/CXCL16/HBEGF/PPIA/CXCL10/CXCR6/CXCL8/CCL18/CCL4/CCL22/ADAM17/CXCL9/S100A14/CH25H/MIF/CCL2/LYN/CORO1A/SLAMF8/DEFB124/CCL8/SYK/RAC2/IL6/LGALS9/CCL7/CCL19/CCR5/ITGB2/CXCL17/IL23A/CXCL3/GPR183/FFAR2/OXSR1/CXCL6/ADAM10/ACKR2/CXCL11/ADAM8/PIK3CD/RHOG/HMGB2/SFTPD/BIN2/CCL5…
GOMF	EXONUCLEASE ACTIVITY	82	0.450313	1.73123	0.000321517	0.00320944	0.00224185	4366	tags=43%, list=21%, signal=34%	ZC3H12A/TREX2/ISG20/EXOSC4/TDP1/FEN1/PNPT1/AEN/EXOSC3/EXO1/ISG20L2/APEX2/CPSF3/DIS3/PDE12/POLQ/CNOT1/EXOSC2/ERI1/ERI2/USB1/EXOSC5/APTX/XRN2/NOCT/CNOT6/TOE1/REXO4/RAD50/DCPS/PLD4/DXO/EXOG/POLD1/ANGEL1
GOBP	ESTABLISHMENT OF PROTEIN LOCALIZATION TO MITOCHONDRIAL MEMBRANE	52	0.521745	1.87	0.00031948	0.00319385	0.00223096	4058	tags=46%, list=19%, signal=37%	TFDP1/GZMB/HSPA4/TIMM8B/TOMM22/NMT1/NDUFA13/YWHAQ/TIMM13/SFN/TIMM10/MAIP1/BID/ROMO1/PDCD5/AP3B1/CASP8/TP63/YWHAZ/BAX/AGK/MAPK8/BCS1L/SAMM50
GOBP	REGULATION OF DEVELOPMENTAL GROWTH	294	-0.298833	-1.48431	0.000318803	0.00319183	0.00222955	3748	tags=30%, list=18%, signal=25%	MSTN/WWC3/PIK3CA/PRKN/SAV1/SOCS2/MBD5/SEMA6D/PTEN/FOXC2/CAPN3/VGLL4/NEDD4L/NRP1/FGFR3/RAI1/SYT1/ERBB4/MFSD2A/APP/ABL1/SIN3A/GPAM/BMP4/JARID2/CXCL12/RTN4R/RGS2/FTO/SEMA3E/GOLGA4/YAP1/INSR/STAT5A/LEP/DIO3/EDN1/NKD1/MACF1/L1CAM/STK3/NOG/PLCB1/SPART/SEMA4G/SEMA6A/ADRB1/DUSP10/FGF13/LATS2/SEMA3B/RYK/APOE/PTPRS/FOXC1/FGFR2/GHR/FN1/BMPR1A/GSK3B/PPARA/MEF2C/RBP4/MAP2/SYT17/NTN1/CDKN1B/WNT2/NPY1R/EPPK1/RT…
GOBP	ATP DEPENDENT CHROMATIN REMODELING	83	0.456416	1.75857	0.000318078	0.00318933	0.0022278	5247	tags=48%, list=25%, signal=36%	RUVBL1/PSME4/CENPN/HDAC1/KNL1/CENPW/CENPX/HNRNPC/OIP5/HJURP/CENPM/CENPK/CENPA/CENPS/NASP/NPM1/CENPH/ACTR8/CENPI/HDAC2/MBD2/ZNHIT1/MIS18A/SMARCA4/SMARCA5/RNF8/SPTY2D1/ACTL6A/CENPL/CENPO/CENPU/INO80B/H4C4/H4C9/MBD3/RBBP4/H4C2/SRCAP/ERCC6/CENPQ
GOBP	NUCLEOSIDE MONOPHOSPHATE BIOSYNTHETIC PROCESS	41	0.563735	1.91893	0.000315312	0.00316632	0.00221172	3901	tags=44%, list=19%, signal=36%	UPP1/TK1/UCK2/TYMS/GART/APRT/ATIC/IMPDH1/HPRT1/AMPD3/ADSL/ADK/UMPS/GMPS/DCTD/RFK/CAD/PRPS2
GOBP	REGULATION OF RELEASE OF CYTOCHROME C FROM MITOCHONDRIA	43	0.552216	1.89432	0.000313719	0.00315504	0.00220384	3321	tags=47%, list=16%, signal=39%	PPIF/PRELID1/GHITM/FAM162A/PYCARD/BAK1/BIK/MMP9/TNFSF10/BID/PDCD5/GPX1/PLAUR/BNIP3/TRIAP1/MFF/BAX/FXN/PSMD10/CIDEB
GOBP	CELLULAR RESPONSE TO INTERFERON BETA	21	0.670088	1.95293	0.000313243	0.00315498	0.0022038	3979	tags=43%, list=19%, signal=35%	STAT1/IFI16/NDUFA13/IRF1/PNPT1/AIM2/HTRA2/MNDA/CDC34
GOBP	MESENCHYME MORPHOGENESIS	48	-0.504749	-1.89689	0.000311555	0.00314268	0.00219521	4675	tags=50%, list=22%, signal=39%	WNT11/HEY1/MSX1/TMEM100/TGFB2/BMP2/FOXC2/ROBO2/NOG/ACTC1/TWIST1/ACTA1/ACVRL1/FOXC1/BMPR1A/SMAD3/ACTA2/RBPJ/MDM4/TGFBR2/BMP7/OSR1/DCHS1/ACTG2
GOBP	HINDBRAIN DEVELOPMENT	137	-0.36965	-1.6731	0.000311067	0.00314248	0.00219507	3432	tags=29%, list=16%, signal=25%	PTBP2/MAFB/CNTN1/ABL1/HES1/ND4/CBLN1/COX1/AHI1/ZNF365/NOG/EN1/HOXB2/EGF/GNPAT/LRP6/PTPRS/FOXC1/MECP2/SEC24B/PTN/PPARGC1A/ALDH1A2/HERC1/TTBK2/RBFOX2/BMP7/HOXB3/RERE/GATA2/FZD4/CKB/PLXNA2/LPAR1/SPTBN2/ZNF423/DLC1/GLI2/BCL2/RORA
GOBP	REGULATION OF HISTONE UBIQUITINATION	12	0.776059	1.96725	0.000308932	0.00312561	0.00218329	3652	tags=67%, list=18%, signal=55%	UBE2N/TRIP12/OTUB2/PARK7/CDK9/CTR9/KDM1A/OTUB1
GOBP	CGMP METABOLIC PROCESS	17	-0.689659	-1.99895	0.000307781	0.00311866	0.00217844	4263	tags=53%, list=20%, signal=42%	GUCY1B1/PDE1A/NPR1/PDE5A/PDE9A/NPR2/GUCY1A2/PDE2A/RORA
GOBP	CARDIAC CELL DEVELOPMENT	71	-0.437016	-1.76507	0.000307531	0.00311866	0.00217844	3069	tags=34%, list=15%, signal=29%	BMP4/PDGFRB/JAG1/TBX3/BVES/RGS2/PDLIM5/SHOX2/EDN1/ACTC1/SORBS2/PPARA/SLC8A1/AKAP13/ADRA1A/FHOD3/PDCD4/SGCB/NEBL/PDGFRA/SPRY1/MYH11/MEF2A/TGFBR3
GOBP	PHAGOCYTOSIS	275	0.341443	1.53089	0.000306283	0.00311287	0.00217439	5595	tags=43%, list=27%, signal=32%	NOD2/CLEC7A/MYD88/PYCARD/LDLR/PLSCR1/RAB27A/ARPC1A/TLR2/ARPC3/TUSC2/PLCG2/ARPC1B/IRF8/RHOH/LMAN2/IFNG/ACTR3/CLCN3/MESD/RAB31/IL1B/RAB5A/CCL2/ATG5/LYN/CSK/FCN1/CORO1A/CD247/HCK/SYK/ARPC2/RAC2/LYAR/CD36/ITGB2/ARHGAP25/BRK1/CD3G/IL2RG/ATG3/PLD2/NCF2/JMJD6/ITGAL/C2/SLAMF1/WASL/VAMP7/RHOG/ARPC5/PIK3R2/SIRPG/CYFIP1/CYBA/ABI1/SFTPD/BIN2/TNF/TREM2/MYH9/SNX3/ICAM3/ANXA1/BAIAP2/C1orf43/P2RY6/TYROBP/PRKCD/E…
GOBP	NEGATIVE REGULATION OF SMOOTH MUSCLE CONTRACTION	13	-0.755758	-2.05803	0.000303818	0.0030925	0.00216016	2662	tags=62%, list=13%, signal=54%	RGS2/DOCK5/DOCK4/ARHGAP42/KCNMA1/PRKG1/SOD1/ADRB2
GOBP	SMOOTH MUSCLE CELL DIFFERENTIATION	56	-0.486316	-1.88185	0.000302915	0.00308798	0.00215701	3985	tags=46%, list=19%, signal=38%	PDGFB/HEY1/ANKRD17/RAMP2/GPER1/EFEMP2/TMEM204/SIRT1/BMP4/HES1/TBX3/FGF9/NFATC2/FGFR2/MECP2/MEF2C/MYOCD/RBPMS2/MRTFB/PDCD4/SGCB/NFATC1/PRDM6/EPC1/PIAS1/KIT
GOCC	REPLICATION FORK	64	0.48835	1.8101	0.00029926	0.00305536	0.00213422	4287	tags=44%, list=21%, signal=35%	UHRF1/H2AX/TIMELESS/PCNA/MCM10/RPA3/DONSON/POLD2/RFC2/MCM3/BLM/RFC3/WDHD1/PIF1/POLA2/HMCES/PRIM1/RAD18/PLRG1/POLD4/SMARCA5/RFC4/TEX264/POLD3/RPA1/TIPIN/RAD51C/POLD1
GOBP	POSITIVE REGULATION OF BONE MINERALIZATION	39	-0.527902	-1.90255	0.00029925	0.00305536	0.00213422	5450	tags=67%, list=26%, signal=49%	ACVR2A/NELL1/KL/PKDCC/TMEM119/ACVR2B/BMP2/BMP6/ATRAID/BMP4/ADGRV1/TFAP2A/ATP2B1/ANO6/P2RX7/GPM6B/BMPR1A/PTN/MEF2C/SLC8A1/BMPR1B/SMAD3/BMP7/OSR1/OSR2/ADRB2
GOBP	RESPIRATORY CHAIN COMPLEX IV ASSEMBLY	26	0.639812	1.96038	0.000295272	0.00302383	0.0021122	3899	tags=58%, list=19%, signal=47%	SCO2/TACO1/COA4/COA1/COA6/SCO1/COA3/COX10/PET100/COX14/COX17/TIMM21/COX16/FASTKD3/BCS1L
GOBP	SYNAPSE ASSEMBLY	166	-0.347252	-1.61435	0.000291835	0.00299321	0.0020908	4366	tags=36%, list=21%, signal=29%	DVL1/NRXN1/PCDHB13/PCLO/FLRT2/DNER/OBSL1/AMIGO1/PCDHB11/LINGO2/GABRA2/PTEN/GABRB3/SHANK2/PLXND1/SLITRK2/ERBB4/APP/SRPX2/ROBO2/CBLN1/SETD5/FZD1/PDLIM5/PCDHB14/NPTN/SLITRK4/CLSTN1/PCDHB2/BHLHB9/LRRN1/PCDHB10/NLGN1/PCDHB4/FARP1/PCDHB5/FGF13/GNPAT/SHANK3/RYK/GPC4/PTPRS/MECP2/GPC6/NTRK2/ADGRL3/MEF2C/SNCA/NTN1/CLSTN2/LRFN5/DLG5/EPHB1/SPTBN2/PCDHB16/SLITRK6/LRP4/EFNB2/MAP1B/EEF2K
GOBP	DNA TEMPLATED TRANSCRIPTION ELONGATION	112	0.415043	1.68398	0.000287474	0.00295299	0.00206271	4252	tags=40%, list=20%, signal=32%	TSFM/POLR2H/EZH2/ELL2/NCBP1/POLR2F/ELOC/ELOB/NELFCD/ALYREF/POLR1H/ZNF326/POLR2L/ELOF1/POLR1C/TAF1D/LEO1/RNF168/ADRM1/POLR2G/HMGN1/POLR2D/POLR1B/ELL/EAF1/THOC5/CDK7/IWS1/PAF1/POLR2E/POLR1G/CCNH/RNF8/NELFE/TEFM/CDK9/CTR9/POLR2I/SSRP1/SUPT4H1/ENY2/POLR1A/CCNK/TCERG1/POLR2J
GOBP	NEGATIVE REGULATION OF IMMUNE EFFECTOR PROCESS	123	0.414822	1.71152	0.000285341	0.00293556	0.00205054	5020	tags=46%, list=24%, signal=35%	SERPINB4/ZC3H12A/NOD2/C1QBP/IL4R/NLRX1/SUSD4/UFD1/TARBP2/ARG1/JAK3/HMOX1/SLAMF8/SERPINB9/DHX58/IL7R/LGALS9/ITCH/GRN/PRKDC/IL2RA/PGLYRP2/LILRB4/HLA-E/BST2/TNF/MICB/XCL1/KLRD1/PGLYRP3/CLEC4G/ANXA1/IRAK3/CD96/CCR2/HLA-F/NPLOC4/HLA-B/LILRB1/HLA-G/CD300A/IL10/RNF26/FOXP3/ILRUN/PARP3/CR1/PTPRC/IL33/FOXF1/TBX21/ARRB2/IFNA2/GPATCH3/MUL1/HLA-A
GOBP	TRNA 5 END PROCESSING	15	0.730162	1.97497	0.000276134	0.0028452	0.00198742	4057	tags=73%, list=19%, signal=59%	HSD17B10/TRMT10C/RPP40/POP5/RPP25L/POP4/POP1/POP7/THG1L/RPP30/RPP38
GOBP	SMOOTHENED SIGNALING PATHWAY	130	-0.372085	-1.66527	0.000275985	0.0028452	0.00198742	3867	tags=45%, list=19%, signal=37%	GLI1/MGRN1/INTU/RAB34/SFRP1/PDCL/IFT81/HIPK1/IFT140/FBXL17/TXNDC15/FOXA1/KCTD6/TBC1D32/PRKACB/BBS7/IFT27/C2CD3/PRRX1/BTRC/IFT172/IFT52/SEPTIN2/TCTN1/PTCHD1/HES1/ENPP1/DZIP1L/DYNC2H1/SHOX2/DZIP1/EVC/CTNNA1/CIBAR1/GLIS2/EVC2/TULP3/CREBBP/RO60/FGFR2/ARL3/ROR2/GPC3/MOSMO/TTBK2/IFT122/TGFBR2/WDPCP/DLG5/PTCH1/WDR19/GAS1/ZNF423/CDON/GLI2/GLI3/BOC/RORA
GOBP	PROTEIN LOCALIZATION TO CHROMOSOME CENTROMERIC REGION	25	0.645813	1.94549	0.000263854	0.00272704	0.00190488	3940	tags=60%, list=19%, signal=49%	CDK1/NDC80/BUB1B/AURKB/TTK/KNL1/ZWILCH/CENPA/CDT1/RCC2/HASPIN/RB1/MIS12/SPDL1/BUB3
GOBP	PRODUCTION OF MOLECULAR MEDIATOR INVOLVED IN INFLAMMATORY RESPONSE	67	0.493902	1.83591	0.000263616	0.00272704	0.00190488	4090	tags=43%, list=20%, signal=35%	ZC3H12A/NOD2/CLEC7A/IL4R/MYD88/PYCARD/PLA2G3/HIF1A/GBP5/STAT3/NOS2/LYN/CD6/SLAMF8/SYK/IL6/CD36/GRN/VAMP8/LILRB4/VAMP7/TNF/NLRC3/NLRP7/SERPINE1/PLD4/MAPK14/IL17F/GPSM3
GOBP	SKIN DEVELOPMENT	323	0.334322	1.52204	0.000260173	0.00269729	0.0018841	3354	tags=26%, list=16%, signal=22%	KRT16/DSC2/PI3/KRT6A/HPSE/KLK13/DSG3/SERPINB13/LCE3D/TGM1/SPRR1B/CDH3/WNT5A/EPHA2/ZDHHC21/SPRR3/KRT6B/CERS3/CNFN/S100A7/SPRR1A/IVL/HDAC1/MACROH2A1/GRHL3/ABCA12/PRKCH/TGM3/KRT17/TMEM79/FERMT1/ST14/CSTA/TRIM16/ZBED2/IL20/ALOX12B/SLC27A4/SPRR2G/BCR/ABCB6/SFN/CTSL/ZMPSTE24/LTB/CYP27B1/STMN1/CBFB/CAPN1/PRSS8/KLK12/AP3B1/NSUN2/PCSK6/TRPC4AP/OVOL2/KRT24/OVOL1/ZFP36/EREG/ETV4/KRT78/PKP3/WNT10A/GRHL1/TP63…
GOBP	MRNA PROCESSING	488	0.303324	1.42584	0.000258931	0.00268856	0.001878	5066	tags=35%, list=24%, signal=27%	CCNB1/EIF4A3/DDX39A/C1QBP/ESRP2/PPIL1/SNRPG/POLR2H/SNRPF/SNRPD1/HNRNPA2B1/ZPR1/AURKAIP1/NCBP1/SRSF9/POLR2F/PRMT5/HNRNPC/PNPT1/DDX41/LSM2/BUD31/PPP4R2/TXNL4A/CPSF6/SF3B3/TRUB2/LSM7/SNRPD3/FASTKD5/EFTUD2/WDR77/SNRNP25/SF3B5/LSM1/CD2BP2/SNU13/UBL5/CPSF3/PPIH/LSM10/PSPC1/ALYREF/SNRPA1/GEMIN6/MAGOHB/CSTF2/SNRPC/TBRG4/GEMIN7/HSPA8/PDE12/SF3B6/ZNF326/LSM5/LSM4/POLR2L/SARNP/LEO1/SNRPB/SRSF2/CMTR2/AQR/ADA…
GOBP	INTERFERON BETA PRODUCTION	51	0.526426	1.88582	0.000256238	0.00266472	0.00186135	3060	tags=37%, list=15%, signal=32%	IRF7/NMI/POLR3G/NLRX1/PYCARD/IFIH1/IRF1/TLR2/RELB/TBK1/DHX58/POLR3B/TRAF3/REL/HMGB2/POLR3D/TLR8/NLRC3/DDX58
GOBP	MITOCHONDRIAL CYTOCHROME C OXIDASE ASSEMBLY	22	0.65102	1.92716	0.000254546	0.00265123	0.00185193	3899	tags=59%, list=19%, signal=48%	SCO2/TACO1/COA4/COA1/SCO1/COA3/PET100/COX14/COX17/TIMM21/COX16/FASTKD3/BCS1L
GOCC	PROTON TRANSPORTING ATP SYNTHASE COMPLEX COUPLING FACTOR F O	12	0.779712	1.97651	0.000252396	0.00263291	0.00183913	2184	tags=67%, list=10%, signal=60%	ATP5MF/ATP5MC3/ATP5PF/ATP5MC1/ATP5PB/ATP5ME/ATP5MG/ATP5PO
GOBP	DENDRITE DEVELOPMENT	230	-0.318501	-1.53095	0.000250673	0.00261901	0.00182942	4590	tags=34%, list=22%, signal=27%	DAB2IP/CUX2/PAK2/HDAC6/SEMA3A/DVL1/ARHGAP44/TRPC6/OBSL1/TNIK/PHACTR1/GRIP1/PREX2/SS18L1/CAMSAP2/GRIN3A/UBE3A/PTEN/NEDD4L/NRP1/SHANK2/IQSEC1/RELN/MFSD2A/ANKRD27/APP/SARM1/HECW2/CAMK1D/LRRK2/PDLIM5/ZNF365/NGEF/BHLHB9/NLGN1/MAP6/EFNA1/FARP1/ZDHHC15/DIP2A/FOXO6/SHANK3/APOE/TMEM106B/PTPRS/DCLK1/MECP2/CAPRIN2/TRAK2/GSK3B/PTN/MEF2C/MAP2/NTN1/IQGAP1/PRKG1/RBFOX2/ABI2/KIDINS220/LAMC2/BMP7/RERE/RAPGEF2/DLG…
GOBP	REPRODUCTIVE SYSTEM DEVELOPMENT	395	-0.282388	-1.44773	0.00024532	0.00256707	0.00179314	3630	tags=29%, list=17%, signal=24%	STOX2/VASH2/UBE3A/ARID4A/PTEN/LGR4/ZNF830/C3/FSTL3/SETD2/DLG1/SIRT1/KRT19/FEM1B/BMP4/WNT7B/ROBO2/HES1/PDGFRB/KITLG/ATRX/CSDE1/TESC/MERTK/TBX3/RSPO3/GJB3/LEP/SPATA2/MGST1/GNRH1/SLIT2/STK3/NOG/ETNK2/LHCGR/SOX8/BPTF/SP3/WDR48/ESR1/FGF9/PPARG/SERPINA5/CTNNA1/PLAG1/LIF/KDM5A/PGR/RPS6/GGNBP2/SLIT3/AKR1C3/PTK2/LRP6/FOXC1/FGFR2/TPPP3/ZNF568/ZFP36L1/NR2F2/GDF7/PKD2/ZFX/ROR2/PTN/RBP4/HOXA11/MYOCD/WNT2/PSAP…
GOMF	CYTOKINE ACTIVITY	219	0.363632	1.59503	0.000245315	0.00256707	0.00179314	4636	tags=33%, list=22%, signal=26%	NAMPT/IL36G/C10orf99/WNT5A/CCL20/IL36RN/CXCL1/CXCL13/CXCL2/IL36A/IL19/AREG/CXCL16/TNFSF10/IL20/CXCL10/CXCL8/CCL18/CCL4/CCL22/CXCL9/AIMP1/LTB/IFNG/IL26/MIF/IL1B/FAM3D/CCL2/IL1RN/GPI/IL12B/CCL8/IL6/CCL7/CCL19/IL17C/IL24/IL23A/CXCL3/GRN/CXCL6/IL32/CXCL11/WNT10A/TNFSF9/TSLP/CCL5/TNF/EBI3/IL36B/FASLG/XCL1/TNFSF15/SECTM1/IL22/CCL17/IL15/TNFSF13B/SPP1/IL10/IL17F/EPO/CKLF/TNFRSF11B/TNFSF13/INHBC/TNFSF14/…
GOBP	ACUTE PHASE RESPONSE	43	0.560325	1.92213	0.000242013	0.00254038	0.0017745	5680	tags=56%, list=27%, signal=41%	SERPINA1/PLSCR1/APOL2/CEBPB/SERPINA3/IL1B/IL6/PTGER3/TNF/SAA4/IL22/PTGES/HP/EPO/SERPINF2/CRP/REG3A/F2/HAMP/TFR2/PTGS2/IL6R/INS/TNFRSF11A
GOBP	PYRIMIDINE CONTAINING COMPOUND SALVAGE	11	0.791112	1.96327	0.000240891	0.00253256	0.00176903	964	tags=45%, list=5%, signal=43%	TYMP/UPP1/TK1/UCK2/PUDP
GOBP	B CELL MEDIATED IMMUNITY	130	0.406695	1.68385	0.000238812	0.00251464	0.00175652	5845	tags=45%, list=28%, signal=32%	IRF7/NOD2/C1QBP/IL4R/MYD88/BCL3/SUSD4/EXOSC3/EXO1/CD27/BATF/NSD2/MAD2L2/RNF168/TFRC/HMCES/C2/C1QB/HLA-E/SLA2/LIG4/HSPD1/TLR8/TNF/XCL1/ERCC1/RNF8/PRKCD/BCL10/NECTIN2/C1QC/IGHV7-81/HLA-G/IL10/FOXP3/PARP3/TRDC/CR1/TNFSF13/PTPRC/CD28/FCER1G/CD40/CRP/TBX21/SLC15A4/HLA-DQB1/C1R/C4BPA/MLH1/KMT5C/CLCF1/LTA/TP53BP1/C1QA/IGHG1/CD226/PAXIP1
GOBP	POSITIVE REGULATION OF LEUKOCYTE PROLIFERATION	141	0.399541	1.66583	0.000236071	0.00248968	0.00173908	4807	tags=45%, list=23%, signal=35%	CD24/CD274/PNP/SLC7A1/MYD88/PRKCQ/PYCARD/SASH3/JAK3/MIF/IL1B/LYN/CD6/CORO1A/IL12B/CDKN1A/SYK/IL6/LGALS9/CCL19/PTPN22/IL23A/GPR183/IL2RA/TFRC/HLA-DMB/FADD/HLA-E/TNFSF9/CD86/BST2/CCL5/DNAJA3/EBI3/XCL1/CD3E/ANXA1/PELI1/IL12RB1/CCR2/CD38/LILRB2/IL15/TNFRSF4/CARD11/ZAP70/RASAL3/TNFSF13B/CD80/FOXP3/EPO/VCAM1/NCK2/CCDC88B/CD1D/CLECL1/PTPRC/CD28/AIF1/AGER/CD40/MAPK3/TICAM1
GOBP	ORGAN GROWTH	144	-0.363026	-1.64973	0.000229952	0.00242896	0.00169667	4040	tags=47%, list=19%, signal=38%	GLI1/YBX3/SMAD2/FGF2/PTPN11/ARID2/HEG1/PAK1/DLL1/IGF1/IL7/ECM1/LATS1/AKAP6/PSAP/PI16/S1PR1/TGFB2/KCNK2/PARP2/WWC3/SAV1/UBE3A/PTEN/FOXC2/VGLL4/FGFR3/ERBB4/JARID2/PDGFRB/THBS3/DDR2/RGS2/PDLIM5/YAP1/LEP/EDN1/STK3/NOG/TSKU/EVC/ESR1/LATS2/PLAG1/FOXC1/FGFR2/SORBS2/BMPR1A/PPARA/DIPK2A/MEF2C/RBP4/AKAP13/WNT2/ADRA1A/PSAPL1/RBPJ/MAPK1/TGFBR2/ZFPM2/AR/SPRY2/BCL2/LEPR/MEIS1/SOD1/TGFBR3
GOBP	SPINAL CORD MOTOR NEURON DIFFERENTIATION	29	-0.600505	-2.00461	0.000225562	0.00238633	0.00166689	3421	tags=34%, list=16%, signal=29%	IFT172/TCTN1/LMO4/SOX4/DYNC2H1/ZC4H2/HOXC10/PTCH1/GLI2/GLI3
GOCC	ORGANELLE ENVELOPE LUMEN	93	0.456135	1.79167	0.000224216	0.00237584	0.00165956	4094	tags=49%, list=20%, signal=40%	CYCS/AK2/PRELID1/CIAPIN1/TIMM8B/PRELID3B/STOML2/TIMM13/DTYMK/SHMT2/STMP1/TIMM23/PNPT1/TIMM10/COA4/AIFM1/CLPB/TRAP1/CHCHD2/CHCHD4/COA6/LYN/TIMM8A/HAX1/NDUFB7/UQCC2/CHCHD5/IMMT/CHCHD7/NDUFA8/COX17/TRIAP1/PARK7/SDHAF3/DIABLO/CDC25C/COA7/HTRA2/THOP1/AGK/PTGES/NDUFS5/PANK2/CPOX/FGR/NDUFS1
GOBP	CLEAVAGE INVOLVED IN RRNA PROCESSING	27	0.63524	1.97391	0.000216971	0.0023027	0.00160847	3999	tags=59%, list=19%, signal=48%	RRP36/TSR1/NHP2/EXOSC3/BOP1/NOP14/RPP40/EXOSC2/ERI1/ERI2/ABT1/NOB1/TBL3/RRS1/EXOSC8/NOL9
GOMF	MOLECULAR CARRIER ACTIVITY	64	0.49427	1.83204	0.00021277	0.00226169	0.00157983	3589	tags=38%, list=17%, signal=31%	RAN/KPNA2/ATOX1/SCO2/NDUFAB1/IPO4/SCO1/EMC6/EMC3/EMC8/HIKESHI/EMC9/XPO6/CSE1L/XPO5/COX17/KPNB1/PARK7/IPCEF1/EMC1/FXN/EMC7/KPNA3/NUTF2
GOBP	POSITIVE REGULATION OF ACTIN FILAMENT BUNDLE ASSEMBLY	61	-0.465625	-1.8201	0.000211525	0.00225202	0.00157307	3502	tags=43%, list=17%, signal=36%	ARHGEF10L/NRP1/TAC1/PXN/ABL1/CCN2/RGCC/SWAP70/S100A10/ARHGEF15/RAPGEF3/TESK1/SORBS3/PFN2/ARHGEF5/ROCK2/SMAD3/FERMT2/SDC4/MYOC/TSC1/LPAR1/LIMCH1/SYNPO2/TPM1/ARHGEF10
GOBP	REGULATION OF MYELOID LEUKOCYTE MEDIATED IMMUNITY	52	0.529924	1.89932	0.000211243	0.00225202	0.00157307	4049	tags=50%, list=19%, signal=40%	IL4R/PTAFR/PLA2G3/DNASE1L3/ARG1/LYN/HMOX1/CD177/SYK/RAC2/LGALS9/ITGB2/CXCL6/VAMP8/HLA-E/C12orf4/VAMP7/DDX21/DDX58/ADGRE2/TYROBP/STX4/CCR2/UNC13D/CD300A/FGR
GOCC	RESPIRATORY CHAIN COMPLEX IV	21	0.677626	1.9749	0.000210801	0.00225144	0.00157267	3949	tags=62%, list=19%, signal=50%	COX6B1/COX7B/UQCRFS1/COX5A/COX8A/C15orf48/COA6/NDUFA4/COX6A1/UQCRC2/COX7C/COX4I1/COX7B2
GOBP	ZYMOGEN ACTIVATION	56	0.523087	1.90009	0.000209037	0.00223617	0.001562	4996	tags=43%, list=24%, signal=33%	ENO1/PGK1/IFI16/PYCARD/PLGRKT/F12/BAK1/PRSS3/PLAT/CTSL/PLAU/CASP8/FADD/FURIN/CIDEB/NLRC4/LGMN/HP/SERPINE1/CYFIP2/SERPINF2/SERPINE2/F9/C1R
GOCC	COSTAMERE	18	-0.685826	-1.99188	0.000208655	0.00223564	0.00156163	4126	tags=83%, list=20%, signal=67%	PLEC/KRT8/VCL/KRT19/ANK2/DAG1/SVIL/SDC4/SYNM/FLNC/FXR1/DMD/AHNAK/PGM5/AHNAK2
GOMF	ATPASE ACTIVITY COUPLED TO TRANSMEMBRANE MOVEMENT OF IONS ROTATIONAL MECHANISM	22	0.654696	1.93805	0.000207913	0.00223125	0.00155856	2676	tags=55%, list=13%, signal=48%	ATP6V0D1/ATP6V1B2/ATP5F1B/ATP6V1G1/ATP6V0B/ATP6V1F/ATP6V1D/ATP6V1C1/ATP6V1C2/ATP6V1H/ATP6V1A/ATP6V0E1
GOBP	EXTERNAL ENCAPSULATING STRUCTURE ORGANIZATION	383	-0.281629	-1.43887	0.000207188	0.00222702	0.00155561	5389	tags=37%, list=26%, signal=28%	ANGPTL7/NTNG2/ITGB3/ADAMTS17/COL5A1/SFRP2/FBN1/VWF/COL1A2/SULF2/COL7A1/COL5A3/VCAN/CMA1/LOXL1/LOXL3/ELANE/NF1/ATP7A/FLOT1/DDR1/PDGFB/MELTF/COL6A1/BGN/ITGAM/HTRA1/PLOD3/LRP1/HPSE2/PHLDB2/COL6A2/KDR/FLRT2/CCDC80/POMT1/ITGB8/TPSAB1/TGFB2/GAS2/ADAMTSL4/BMP2/MMP2/ITGA1/RAMP2/CTSK/ELN/ITGAV/EFEMP2/COL4A5/MMP27/SLC2A10/MATN4/FOXC2/CYP1B1/ADAMTS5/COL28A1/LAMA2/CREB3L1/SH3PXD2B/COL8A1/MFAP2/WASHC1/APP/ABL…
GOCC	PROTON TRANSPORTING TWO SECTOR ATPASE COMPLEX PROTON TRANSPORTING DOMAIN	22	0.656301	1.9428	0.000204027	0.00219656	0.00153433	3724	tags=59%, list=18%, signal=49%	ATP5MF/ATP5MC3/ATP6V0D1/ATP5PF/ATP5MC1/ATP6V0B/ATP5PB/ATP5ME/ATP5MG/ATP5PO/ATP6V0E1/ATP5PD/ATP6V0A2
GOBP	SPLICEOSOMAL SNRNP ASSEMBLY	37	0.577435	1.922	0.00020349	0.00219429	0.00153275	3127	tags=43%, list=15%, signal=37%	SNRPG/SNRPF/SNRPD1/PRMT5/LSM2/SNRPD3/WDR77/CD2BP2/GEMIN6/SNRPC/GEMIN7/LSM4/SNRPB/PRPF31/STRAP/GEMIN2
GOBP	PROTEIN INSERTION INTO MEMBRANE	76	0.48788	1.85112	0.000198806	0.00214723	0.00149987	4058	tags=43%, list=19%, signal=35%	TFDP1/GZMB/HSPA4/TIMM8B/RTP4/TOMM22/NMT1/NDUFA13/YWHAQ/TIMM13/SFN/TIMM10/UBL4A/MAIP1/BID/ROMO1/EMC6/PDCD5/EMC3/EMC8/EMC9/CASP8/TP63/YWHAZ/GET3/EMC1/BAX/AGK/EMC7/MAPK8/SGTA/BCS1L/SAMM50
GOBP	POSITIVE REGULATION OF INTERLEUKIN 8 PRODUCTION	56	0.524925	1.90677	0.000194985	0.00210935	0.00147342	3874	tags=45%, list=19%, signal=36%	WNT5A/NOD2/CLEC7A/MYD88/AFAP1L2/PYCARD/TLR2/STAT3/CD2/LAMTOR5/IL1B/FCN1/SYK/IL6/LGALS9/FFAR2/CD58/FADD/PARK7/TLR8/TNF/DDX58/BCL10/CD244/SERPINE1
GOBP	POSITIVE REGULATION OF CELL KILLING	58	0.514183	1.86458	0.000194788	0.00210935	0.00147342	4406	tags=55%, list=21%, signal=44%	CLEC7A/CYRIB/ARG1/PRF1/IFNG/NOS2/RAET1E/IL12B/RASGRP1/SYK/IL18RAP/SH2D1A/IL23A/LAG3/FADD/HLA-E/NCR3/CRTAM/XCL1/KLRD1/CD1B/HLA-DRA/IL12RB1/TYROBP/B2M/HLA-F/HLA-B/NECTIN2/HLA-G/VAV1/CD1D/PTPRC
GOBP	DNA TEMPLATED TRANSCRIPTION TERMINATION	72	0.483602	1.8169	0.000194683	0.00210935	0.00147342	5659	tags=57%, list=27%, signal=42%	SNRPG/POLR2H/SNRPF/NCBP1/POLR2F/PRMT5/ZMPSTE24/SNRPD3/CPSF3/LSM10/CSTF2/POLR3K/POLR1H/POLR2L/POLR1C/TAF1D/SNRPB/POLR1B/CDK7/CLP1/POLR2E/POLR1G/TTF2/CCNH/CPSF4/XRN2/SSU72/CSTF1/WDR33/CSTF3/POLR1A/TAF1B/PAPOLA/GTF2H1/SLBP/SYMPK/SNRPE/NCBP2/TAF1A/MED18/ZNF473
GOMF	PEPTIDE TRANSMEMBRANE TRANSPORTER ACTIVITY	32	0.591466	1.90939	0.000192303	0.00209044	0.00146021	4824	tags=59%, list=23%, signal=46%	ABCC1/TOMM22/SEC61G/TIMM17A/TAP1/TIMM23/TOMM40L/TAP2/TOMM40/SLC15A1/SEC61A1/TAPBP/SLC15A3/TIMM17B/MCL1/GJA1/ABCC5/SEC61A2/SLC15A4
GOBP	REGULATION OF ACTIN FILAMENT BASED PROCESS	374	-0.283866	-1.45077	0.000190922	0.00207879	0.00145207	3136	tags=27%, list=15%, signal=23%	PXN/DLG1/WASHC1/ABL1/CCN2/PDGFRB/TENM1/WASF2/RGCC/BCAS3/TMSB4X/CXCL12/FAM107A/EFNA5/SEMA3E/SWAP70/BST1/CLASP1/S100A10/EDN1/SLIT2/ARHGEF15/KANK4/RHOBTB1/FZD10/RAPGEF3/RHOQ/ADD1/MET/FMN1/PDGFA/TMOD2/WASF3/FGF13/ALMS1/FER/PLEKHH2/TMSB15B/SHANK3/TESK1/GPM6B/DSTN/DSG2/ANK2/DSP/BIN1/VILL/SORBS3/ARHGAP35/NTF3/PAM/PFN2/SPTAN1/RHOB/ARHGEF5/RICTOR/AKAP13/IQGAP1/ROCK2/ARHGAP6/SCIN/SMAD3/FERMT2/FHOD3/SVIL/AB…
GOBP	PROTEIN DNA COMPLEX SUBUNIT ORGANIZATION	250	0.351789	1.56569	0.000189129	0.00206261	0.00144077	3657	tags=30%, list=18%, signal=25%	DLGAP5/RUVBL1/H2AX/PSME4/CENPN/MCM6/MACROH2A1/PSMC4/KNL1/RPA3/RAD51/CENPW/MCM4/CDC45/CENPF/MCM5/CENPX/MCM2/ASF1B/CENPE/OIP5/HJURP/CENPM/CENPK/CENPA/IPO4/PSMC3/CDT1/MYC/POLE3/MCM7/RBX1/PIH1D1/CENPS/MCM3/GTF2A2/HAT1/PSMC5/SMARCD3/PSMC2/NASP/PSMC6/CETN2/NPM1/GRWD1/CENPH/CENPI/NAP1L4/HMGB2/H2BC9/MACROH2A2/CDK7/H3C10/HELLS/PAF1/GTF2E1/ZNHIT1/MIS18A/SMARCA4/RB1/CCNH/TAF11/PARP1/SMARCA5/HMGA1/RNF8/CAND1…
GOBP	NEGATIVE REGULATION OF GROWTH	233	-0.323065	-1.55278	0.000186872	0.00204131	0.00142589	4470	tags=39%, list=21%, signal=31%	PI16/MSX1/SEMA3A/UBAP2/WFDC1/CCDC85B/BTG1/NDRG3/RBBP7/TGFB2/KCNK2/CGRRF1/MSTN/WWC3/SAV1/IP6K2/SOCS2/SEMA6D/PTEN/VGLL4/NRP1/MT1H/OSGIN2/FGFR3/NPR1/RAI1/SIRT1/ING5/BMP4/MEG3/JARID2/SCGB3A1/DACT3/ST7L/ENPP1/ING1/RTN4R/RGS2/SEMA3E/NKD1/SLIT2/STK3/NOG/CCN3/SPART/SEMA4G/SERTAD2/SEMA6A/ADRB1/DUSP10/FGF13/PPARG/SEMA3B/ACVRL1/RYK/SLIT3/PTPRS/RERG/SMARCA2/GREM1/TSPYL2/SH3BP4/CAPRIN2/PPARA/GPC3/FRZB/MT1X/RB…
GOCC	RIBOSOMAL SUBUNIT	176	0.382613	1.63756	0.00018569	0.00203171	0.00141918	2788	tags=35%, list=13%, signal=30%	MRPL15/MRPL51/RPL26L1/MRPL35/MRPS11/MRPS7/MRPL47/MRPL13/MCTS1/MRPS16/MRPS15/ISG15/MRPL46/MRPS12/MRPL37/MRPS17/MRPL3/MRPL27/MRPL36/MRPL11/MRPL17/MRPL42/MRPL52/NDUFAB1/MRPL32/MRPL14/MRPS21/MRPS22/MRPS14/MRPL20/MRPS33/MRPL58/MRPL54/MRPS18C/MRPL19/MRPL50/MRPL4/MRPL16/MRPL22/MRPS36/MRPL12/MRPL21/MRPL41/MRPL39/MRPL23/MPV17L2/MRPL28/MRPS28/MRPS2/MRPS35/MRPS6/MRPL18/MRPS30/MRPL55/MRPL48/MRPL57/MRPS27/MRP…
GOCC	SMALL NUCLEAR RIBONUCLEOPROTEIN COMPLEX	69	0.486052	1.81583	0.000183593	0.00201203	0.00140544	2761	tags=36%, list=13%, signal=32%	SNRPG/SNRPF/SNRPD1/LSM2/TXNL4A/SF3B3/LSM7/SNRPD3/EFTUD2/SF3B5/CD2BP2/SNU13/PPIH/LSM10/SNRPA1/SNRPC/SF3B6/LSM5/LSM4/SNRPB/LUC7L2/PRPF31/USP39/LSM6/PRPF4
GOMF	UBIQUITIN LIKE PROTEIN LIGASE BINDING	302	0.336456	1.5291	0.000182088	0.0019988	0.0013962	4190	tags=35%, list=20%, signal=28%	CCNB1/TPI1/STAT1/PARP9/SLC25A5/CXCR4/UBE2C/FZD5/UBE2L6/UBE2N/PSMA3/UBE2T/EIF4E2/VCP/AURKA/ISG15/DTX3L/HIF1A/UBE2L3/HSPA5/CCT2/HM13/RALB/HSPA9/TRIB2/ELOB/CEBPB/PSMD1/TOLLIP/IKBKE/LYN/BID/GPI/CASP10/MFHAS1/UBE2D1/STAM/HSPA8/CDKN1A/RBX1/UBE2A/GLMN/PA2G4/TRAF1/TRAF3/XRCC5/PTPN22/CACUL1/ITCH/STAT2/IKBKG/AUP1/RANGAP1/CASP8/CUL1/CHEK2/ARRDC1/UBE2G1/DDRGK1/PRKAR2A/HSPBP1/LAPTM5/LTBR/TNFRSF1B/BOK/RAD18/MI…
GOBP	SEX DIFFERENTIATION	252	-0.30713	-1.48696	0.000179735	0.00197621	0.00138041	3121	tags=26%, list=15%, signal=23%	SIRT1/ROBO2/PDGFRB/KITLG/ATRX/CSDE1/TESC/MERTK/TBX3/DACH1/LEP/SPATA2/MGST1/GNRH1/SLIT2/LHCGR/SOX8/WDR48/ESR1/FGF9/CTNNA1/KDM5A/PGR/DMRT2/SLIT3/AKR1C3/LRP6/FOXC1/PBX1/BMPR1A/ZFX/ROR2/RBP4/HOXA11/SMAD5/BMPR1B/IRX5/STAR/ZFPM2/OSR1/FZD4/HOXA10/PKD1/IMMP2L/WDR19/STAT5B/PLEKHA1/ACVR1B/NUPR1/AGO4/AXL/PDGFRA/ASB1/INHBB/FST/RNF38/AR/PATZ1/KIT/BCL2/SOD1/RHOBTB3/WNT2B/CCND1/ANG/GATA3
GOBP	RESPONSE TO TOPOLOGICALLY INCORRECT PROTEIN	199	0.363191	1.58047	0.000179175	0.00197327	0.00137836	4453	tags=38%, list=21%, signal=30%	HSPA4/MANF/CHAC1/VCP/HSPA4L/F12/ATP6V0D1/ERP44/BAK1/EIF2S1/HSPA5/FBXO6/SERP1/ERO1A/PTPN2/CXCL8/DNAJB11/HSPA14/HSPA9/UFD1/YIF1A/HSPE1/CCL2/BAG3/COPS5/SRPRB/HSPA8/HDGF/SHC1/HSPH1/HYOU1/EDEM1/PREB/TOR1A/DERL2/DNAJB1/AUP1/DDRGK1/PDIA6/ATF4/BOK/SDF2L1/HSPD1/EDEM2/GET3/UBE2J2/CANX/RNF126/EDEM3/COMP/BAX/PPP1R15B/WIPI1/SSR1/MYDGF/ASNS/DAXX/TMEM129/TOR1B/EXTL3/PPP2R5B/UBE2W/STT3B/GSK3A/DNAJB5/YOD1/TMEM33/…
GOCC	TIM23 MITOCHONDRIAL IMPORT INNER MEMBRANE TRANSLOCASE COMPLEX	13	0.770131	1.99532	0.000178872	0.00197317	0.00137829	4029	tags=85%, list=19%, signal=68%	GRPEL1/TIMM50/TIMM17A/TIMM23/TIMM10/ROMO1/DNAJC15/TIMM21/GRPEL2/TIMM17B/DNAJC19
GOMF	TOLL LIKE RECEPTOR BINDING	12	0.785254	1.99055	0.000177817	0.00196477	0.00137242	2707	tags=67%, list=13%, signal=58%	S100A9/S100A8/MYD88/TLR2/TOLLIP/SYK/CD36/LY96
GOBP	MONONUCLEAR CELL MIGRATION	174	0.382995	1.64049	0.000176662	0.00195522	0.00136575	4814	tags=42%, list=23%, signal=33%	S100A12/CXCR2/C10orf99/WNT5A/CCL20/CXCR4/C1QBP/S100A7/PYCARD/CCR7/CXCL13/CYP7B1/CXCL16/CXCL10/CCL18/CCL4/CCL22/ADAM17/S100A14/CH25H/CCL2/LYN/SLAMF8/SPNS2/DEFB124/CCL8/IL6/ITGA4/RIPK3/LGALS9/CCL7/CCL19/CCR5/CXCL17/GPR183/DOCK8/OXSR1/ADAM10/CXCL11/ITGAL/ADAM8/FADD/WASL/PIK3CD/EXT1/CRTAM/CCL5/TNF/XCL1/CCR1/ANXA1/ICAM1/CCR2/CCL17/GCSAM/LGMN/TMEM102/ZAP70/JAML/SERPINE1/MSN/GPR15/CKLF/MYO1G/AKIRIN1/C3A…
GOBP	AUTONOMIC NERVOUS SYSTEM DEVELOPMENT	46	-0.503398	-1.87971	0.000174794	0.00193773	0.00135354	5087	tags=52%, list=24%, signal=40%	RET/SOX11/PLXNA4/INSM1/EDNRB/TBX1/NF1/SEMA3A/CTNNB1/EGR2/NRP1/HES1/TFAP2A/SOX10/SOX4/SOX8/FZD3/HOXB2/GFRA3/FN1/ADARB1/TFAP2B/KIF26A/GATA3
GOBP	POSITIVE REGULATION OF CELL JUNCTION ASSEMBLY	91	-0.419676	-1.78843	0.000174602	0.00193773	0.00135354	5183	tags=47%, list=25%, signal=36%	NPHP1/AMIGO2/LRRTM2/SLITRK5/EPHB3/FLOT1/CUX2/TEK/NRXN1/KDR/FLRT2/AMIGO1/LINGO2/NRP1/SLITRK2/NPHP4/ABL1/SRPX2/CBLN1/AGT/CLDN3/S100A10/CLSTN1/BHLHB9/LRRN1/NLGN1/FMN1/CLDN5/NTRK2/COL16A1/CLSTN2/IQGAP1/SMAD3/FERMT2/SDC4/DLG5/MYOC/EPHB1/TSC1/SLITRK6/CAV1/EEF2K/CLDN1
GOBP	REGULATION OF DEFENSE RESPONSE TO VIRUS BY HOST	40	0.568989	1.92037	0.000171716	0.00190991	0.00133411	3674	tags=45%, list=18%, signal=37%	ZC3H12A/STAT1/PARP9/PYCARD/DTX3L/MMP12/TARBP2/AIM2/CGAS/IL12B/PTPN22/IL23A/MICB/DDX58/PQBP1/IL12RB1/IL15/LILRB1
GOBP	HEART VALVE DEVELOPMENT	60	-0.471025	-1.83118	0.000170656	0.00190127	0.00132807	4040	tags=42%, list=19%, signal=34%	TGFB2/BMP2/ELN/BMP4/ROBO2/JAG1/MATR3/SOX4/SHOX2/SLIT2/EFNA1/TWIST1/ZBTB14/SLIT3/BMPR1A/MEF2C/ROCK2/PDE2A/RBPJ/MDM4/TGFBR2/DCHS1/NFATC1/NOTCH2/GATA3
GOBP	ALPHA BETA T CELL DIFFERENTIATION	103	0.438374	1.75884	0.000170049	0.00189765	0.00132554	4101	tags=43%, list=20%, signal=34%	ZC3H12A/NFKBIZ/PNP/IL4R/CD83/ENTPD7/RSAD2/BCL3/IRF1/PRDM1/STAT3/CTSL/SASH3/AP3D1/JAK3/IFNG/RELB/SOCS1/CBFB/IL12B/SYK/IL6/LGALS9/CCL19/AP3B1/IL23A/BATF/GPR183/ITK/LILRB4/CD86/EOMES/LEF1/SEMA4A/NFKBID/ANXA1/HLA-DRA/IL12RB1/ZAP70/NLRP3/MTOR/CD80/FOXP3/ZNF683
GOBP	T CELL DIFFERENTIATION	238	0.359178	1.595	0.000169921	0.00189765	0.00132554	4101	tags=38%, list=20%, signal=31%	ZC3H12A/NFKBIZ/PNP/FZD5/PRELID1/IL4R/CCR7/CD83/ENTPD7/VNN1/RSAD2/PTPN2/LCK/BCL3/IRF1/ADAM17/PRDM1/STAT3/CTSL/CD2/SASH3/RHOH/AP3D1/JAK3/IFNG/RELB/IL1B/CD3D/ATG5/SOCS1/CBFB/IL12B/FANCD2/ZC3H8/SYK/IL7R/IL6/RIPK3/LGALS9/CCL19/CD27/AP3B1/PTPN22/IL23A/BATF/GPR183/LAG3/CD3G/PRKDC/IL2RA/JMJD6/ITK/ADAM8/FADD/LILRB4/PIK3CD/TNFSF9/CD86/LIG4/CRTAM/TMEM131L/CD8A/EOMES/DNAJA3/LEF1/SEMA4A/IL36B/NFKBID/THEMIS/IL…
GOCC	MITOTIC SPINDLE	157	0.393269	1.66918	0.00016877	0.00188966	0.00131996	2746	tags=30%, list=13%, signal=26%	CXCR2/CDK1/NUSAP1/AURKB/KIF18B/PRC1/MAD2L1/ASPM/AURKA/TPX2/SPAG5/TUBG1/CDC6/KIF11/TACC3/CENPE/ECT2/KIF23/SKA3/SKA1/FAM83D/RACGAP1/ESPL1/RMDN1/HAUS1/KIF18A/PLK1/RMDN2/BCCIP/LIMK2/DYNLL1/KIF20B/RCC2/TAF1D/CDC7/IKBKG/RANGAP1/RAE1/CKAP2L/NUDCD2/SPOUT1/KIF22/TRAPPC14/SMC6/GPSM2/KIFC1/MAPRE1
GOBP	TRANSCRIPTION COUPLED NUCLEOTIDE EXCISION REPAIR	72	0.486457	1.82763	0.000166673	0.0018693	0.00130574	5193	tags=53%, list=25%, signal=40%	COPS3/PCNA/POLR2H/RPA3/POLR2F/COPS5/POLD2/RBX1/RFC2/COPS2/POLR2L/RFC3/AQR/POLR2G/HMGN1/POLR2D/CDK7/ISY1/POLR2E/POLD4/ERCC8/GPS1/CCNH/COPS6/ERCC1/RFC4/COPS4/POLD3/POLR2I/COPS7A/RPA1/POLR2J/POLD1/RFC5/PRPF19/LIG1/GTF2H1/ERCC6
GOBP	MONOSACCHARIDE CATABOLIC PROCESS	60	0.499761	1.82922	0.000164674	0.00184996	0.00129223	3165	tags=37%, list=15%, signal=31%	ENO1/TPI1/PGAM1/PGK1/PGM2/HK2/TIGAR/GALE/FUT2/ALDOA/FOXK2/FUT1/GAPDH/NUDT5/GPI/GALK1/RBKS/PFKFB2/PFKP/GLYCTK/PKM/ADPGK
GOBP	SYNAPSE ORGANIZATION	399	-0.275531	-1.40893	0.000164084	0.00184643	0.00128976	4590	tags=32%, list=22%, signal=25%	DAB2IP/ITGAM/CUX2/SYNPO/ERC1/HDAC6/DVL1/ARHGAP44/NRXN1/PCDHB13/PCLO/FLRT2/GPHN/DNER/OBSL1/TANC1/AMIGO1/LRRC4C/PCDHB11/LINGO2/GABRA2/COL4A5/NFASC/UBE3A/PTEN/PDZRN3/GABRB3/SHANK2/PPFIBP1/PLXND1/RELN/C3/ZDHHC2/SLITRK2/CTTNBP2/ERBB4/DLG1/APP/ABL1/WNT7B/SRPX2/ROBO2/DOK7/CBLN1/WASF2/SETD5/FZD1/LRRK2/PDLIM5/ZNF365/SEMA3E/PCDHB14/NPTN/NGEF/INSR/L1CAM/SNCG/SLITRK4/F2R/CLSTN1/MYOT/PCDHB2/BHLHB9/ARHGEF15/ZC…
GOBP	PROTEIN TRANSMEMBRANE TRANSPORT	57	0.518699	1.8828	0.000163203	0.0018396	0.00128499	3595	tags=47%, list=17%, signal=39%	TOMM22/GRPEL1/SEC61G/TIMM50/HSPA5/TIMM17A/TIMM23/TOMM40L/AIFM1/SEC61B/TOMM40/CHCHD4/ROMO1/HSPA8/DNAJC15/PEX10/SEC61A1/TIMM44/TIMM21/HSPD1/GRPEL2/DNLZ/SRP54/PEX13/PEX2/TIMM17B/MCL1
GOCC	OUTER MITOCHONDRIAL MEMBRANE PROTEIN COMPLEX	20	0.696039	2.01169	0.000159791	0.00180416	0.00126024	1597	tags=60%, list=8%, signal=55%	MFN1/TOMM22/TOMM5/MTX2/HSPA9/TOMM40L/MICOS10/TOMM40/MICOS13/MTX1/CHCHD3/IMMT
GOBP	CARDIAC CHAMBER DEVELOPMENT	150	-0.371339	-1.69232	0.000158776	0.00179572	0.00125434	4733	tags=37%, list=23%, signal=29%	SEMA3C/WNT11/HEY1/NPRL3/TEK/MED1/TMEM65/CRELD1/TGFB2/KCNK2/BMP2/SAV1/SOS1/FOXC2/NRP1/PLXND1/PPP1R13L/BMP4/ROBO2/HES1/JAG1/MATR3/TBX3/LMO4/DHRS3/SOX4/SHOX2/SLIT2/NOG/CPE/PARVA/ZBTB14/NPY5R/SLIT3/ANK2/DSP/FOXC1/FGFR2/BMPR1A/NPHP3/MEF2C/RBP4/MYOCD/WNT2/PDE2A/RBPJ/MDM4/TGFBR2/BMP7/ZFPM2/TNNC1/TPM1/NOTCH2/TGFBR3/GATA3
GOMF	ANION TRANSMEMBRANE TRANSPORTER ACTIVITY	435	0.30809	1.43591	0.000158241	0.00179269	0.00125222	4573	tags=29%, list=22%, signal=23%	SLC6A14/SLC26A9/SLC5A1/SLC25A5/SLC7A1/SLC7A11/SFXN1/CLCA2/APOL1/ABCC1/FLVCR2/SLC35B1/ABCA12/TOMM22/SEC61G/SLC16A1/LRRC8B/SLC23A2/SLC16A6/SLC16A10/TIMM17A/TAP1/TIMM23/ABCB6/SLC7A5/TOMM40L/SLC25A13/TAP2/CLDN17/VDAC2/SLC28A3/CLCN3/SLC25A15/TOMM40/SLC5A6/SLC24A3/LRRC8D/SLC2A1/SLC38A5/ABCG1/SLC25A10/PACC1/SLC36A1/SLC25A25/SLC25A33/SLC25A51/SLC25A44/FXYD3/SFXN2/SLCO4A1/SLC6A15/SLC3A2/CD36/SLC4A11/SLC15…
GOBP	POSITIVE REGULATION OF ADAPTIVE IMMUNE RESPONSE	98	0.444044	1.76283	0.00015778	0.00179048	0.00125068	5845	tags=57%, list=28%, signal=41%	CD274/NFKBIZ/NOD2/FZD5/PRKCQ/PYCARD/RSAD2/CYRIB/SASH3/EXOSC3/IL1B/IL12B/IL6/IL23A/NSD2/MAD2L2/TFRC/HMCES/FADD/HLA-E/HSPD1/TNF/NFKBID/XCL1/CD1B/HLA-DRA/IL12RB1/CCR2/B2M/HLA-F/HLA-B/NECTIN2/NLRP3/TNFSF13B/HLA-G/FOXP3/TRAF2/FBXO38/TNFSF13/CD1D/NLRP10/PTPRC/CD28/MALT1/CD40/TBX21/HLA-A/PVR/MLH1/KMT5C/IL1R1/CLCF1/LTA/TP53BP1/CD226/PAXIP1
GOMF	PROTON TRANSPORTING ATP SYNTHASE ACTIVITY ROTATIONAL MECHANISM	15	0.741267	2.00501	0.000157445	0.00178971	0.00125014	3460	tags=80%, list=17%, signal=67%	ATP5MF/ATP5PF/ATP5F1B/ATP5PB/ATP5ME/ATP5MG/ATP5F1C/ATP5PO/ATP6V1A/ATP5F1D/ATP5F1A/ATP5PD
GOBP	PHAGOSOME ACIDIFICATION	28	0.630487	1.97812	0.000153547	0.00174836	0.00122126	2676	tags=46%, list=13%, signal=41%	RAB38/ATP6V0D1/ATP6V1B2/ATP6V1G1/ATP6V0B/ATP6V1F/SLAMF8/ATP6V1D/ATP6V1C1/ATP6V1C2/ATP6V1H/ATP6V1A/ATP6V0E1
GOBP	RESPONSE TO INTERLEUKIN 12	48	0.547412	1.93447	0.000153185	0.00174719	0.00122044	3970	tags=54%, list=19%, signal=44%	PSME2/GSTO1/IL12RB2/HNRNPA2B1/PPIA/HSPA9/IFNG/MIF/TALDO1/P4HB/SNRPA1/IL12B/SOD2/CAPZA1/CNN2/LMNB1/TCP1/HNRNPF/CFL1/PITPNA/LCP1/IL12RB1/RPLP0/MSN/SERPINB2/IL10
GOCC	WNT SIGNALOSOME	11	-0.791205	-2.02477	0.000152912	0.00174705	0.00122034	4366	tags=100%, list=21%, signal=79%	CTNNB1/LRP5/APC/FZD1/LRRK2/RECK/ADGRA2/LRP6/GSK3B/WNT2
GOBP	ENDOCARDIAL CUSHION MORPHOGENESIS	33	-0.586769	-2.03703	0.00015233	0.00174336	0.00121777	5056	tags=48%, list=24%, signal=37%	SMAD4/HEY1/MSX1/TMEM100/TGFB2/BMP2/ROBO2/NOG/TWIST1/ACVRL1/BMPR1A/RBPJ/MDM4/TGFBR2/BMP7/DCHS1
GOBP	POSITIVE REGULATION OF T CELL APOPTOTIC PROCESS	12	0.78898	2	0.000151698	0.00173909	0.00121478	2825	tags=67%, list=14%, signal=58%	CD274/WNT5A/PRELID1/IDO1/ZC3H8/LGALS9/ADAM8/CCL5
GOBP	RIBONUCLEOSIDE MONOPHOSPHATE BIOSYNTHETIC PROCESS	34	0.594222	1.95072	0.000150497	0.00172827	0.00120722	5291	tags=56%, list=25%, signal=42%	UPP1/UCK2/GART/APRT/ATIC/IMPDH1/HPRT1/AMPD3/ADSL/ADK/UMPS/GMPS/RFK/CAD/PRPS2/PAICS/LHPP/PPAT/CMPK1
GOBP	NEGATIVE REGULATION OF NUCLEAR DIVISION	54	0.529864	1.91936	0.000148668	0.00171019	0.0011946	2381	tags=39%, list=11%, signal=35%	CCNB1/CDC20/NDC80/BUB1B/AURKB/MAD2L1/ZWINT/TTK/BUB1/TRIP13/AURKAIP1/CENPF/CDT1/ZNF207/PLK1/GEN1/MAD2L2/FBXO5/MAD2L1BP/TOM1L1/LCMT1
GOCC	PROTEASOME REGULATORY PARTICLE BASE SUBCOMPLEX	12	0.789427	2.00113	0.000147679	0.00170173	0.00118869	3166	tags=83%, list=15%, signal=71%	PSMC4/PSMD2/PSMD1/PSMC3/PSMD9/PSMC5/PSMC2/PSMC6/PSMC1/PSMD10
GOBP	CELLULAR RESPONSE TO HEAT	113	0.429987	1.74817	0.000145729	0.00168214	0.001175	4434	tags=45%, list=21%, signal=36%	DNAJB6/VCP/RPA3/EIF2S1/CXCL10/ATP2A2/NUP37/IRAK1/NUP210/HSBP1/NUP88/CLPB/IER5/BAG3/LYN/HMOX1/HSPA8/CDKN1A/HSPH1/PDCD6/NUP50/HIKESHI/DNAJB1/POLR2D/RAE1/SEC13/DNAJC7/TFEC/CHORDC1/NUP155/HDAC2/NDC1/MLST8/HTRA2/DNAJC2/NUP188/NUP85/PTGES3/FKBP4/DAXX/MAPKAPK2/NUP205/NUP58/MTOR/NUP107/NUP93/ATR/POM121/RPA1/NUP160/AKT1S1
GOBP	PROTEIN TARGETING TO MEMBRANE	193	-0.335492	-1.5758	0.0001436	0.00166043	0.00115983	4893	tags=44%, list=23%, signal=34%	GDI1/RPS12/TRAM2/RPS7/RPS18/MYO1C/RPL19/AQP11/ITGAM/PDZK1/RPL35/ZDHHC7/SRP14/RPL37A/ARL6/ZDHHC3/VPS37C/TRAM1/RPL24/RABGEF1/DMTN/RPS11/RPS5/RPS9/NACAD/RPL41/PIKFYVE/C2CD5/RPL23A/SGTB/ZDHHC2/TCAF1/RPS25/RPS15A/RPS15/RPL13A/RPL32/RPL7A/RPS27/RPL31/RPL18/RPL27/RPS8/RPL4/CHMP4B/RPL12/RPL9/ZDHHC15/RPS6/RPL13/NACA4P/RPL10A/SEC62/RPL11/RPL37/RPL14/RPS4X/RPLP2/SDCBP/RPS14/RPLP1/RPL8/GOLGA7/RPS17/RPS24/RPL…
GOBP	NEGATIVE REGULATION OF VASCULAR PERMEABILITY	15	-0.727864	-2.04913	0.000142758	0.00165353	0.00115502	3852	tags=67%, list=18%, signal=54%	RAMP2/ANGPT1/PDE3A/SLIT2/CLDN5/ARHGAP35/AKAP12/PDE2A/FERMT2/DDAH1
GOBP	EPIDERMAL CELL DIFFERENTIATION	269	0.350081	1.56777	0.000141149	0.00163772	0.00114397	2941	tags=24%, list=14%, signal=21%	KRT16/DSC2/PI3/KRT6A/KLK13/DSG3/SERPINB13/LCE3D/TGM1/SPRR1B/CDH3/WNT5A/EPHA2/SPRR3/KRT6B/CERS3/CNFN/S100A7/SPRR1A/IVL/HDAC1/MACROH2A1/ABCA12/PRKCH/TGM3/EZH2/KRT17/TMEM79/ST14/CSTA/TRIM16/ZBED2/IL20/SPRR2G/BCR/SFN/CTSL/CYP27B1/CBFB/CAPN1/PRSS8/KLK12/SULT2B1/PCSK6/OVOL2/KRT24/OVOL1/ZFP36/SLC9A3R1/EREG/ETV4/KRT78/PKP3/GRHL1/TP63/AQP3/KRT37/FURIN/MACROH2A2/PLAAT4/KEAP1/HDAC2/ADAM9/RPTN/UGCG
GOBP	REGULATION OF CELL DEVELOPMENT	464	-0.270412	-1.4075	0.000141142	0.00163772	0.00114397	4184	tags=31%, list=20%, signal=25%	CTNNB1/TRPC6/OBSL1/RUFY3/HDAC9/RFLNB/SORL1/SERPINF1/BMP2/EGR2/XRCC2/AMIGO1/RNF112/GPER1/ILK/TRIOBP/DMTN/SS18L1/TACSTD2/SEMA6D/PTEN/NRP1/HOOK3/PLXND1/VCL/VEGFC/EFNB3/RELN/TIAM2/PDE3A/ANKRD27/ABL1/BMP4/ROBO2/HES1/CXCL12/NAP1L1/RTN4R/SOX10/LRRK2/EFNA5/SPEN/ZNF365/SHOX2/SEMA3E/RECK/GOLGA4/NPTN/YAP1/NPR2/DIO3/S100A10/MACF1/L1CAM/PRUNE1/SLIT2/SNW1/NOG/IL6ST/ADIPOQ/PLCB1/SOX8/BHLHB9/FZD3/SPART/SEMA4G/DO…
GOBP	PHAGOSOME MATURATION	46	0.541747	1.88322	0.000140927	0.00163772	0.00114397	2676	tags=35%, list=13%, signal=30%	RAB38/MREG/ATP6V0D1/ATP6V1B2/ATP6V1G1/ATP6V0B/ATP6V1F/RAB31/CORO1A/SLAMF8/ATP6V1D/ATP6V1C1/ATP6V1C2/ATP6V1H/ATP6V1A/ATP6V0E1
GOBP	PROTEIN PROCESSING	215	0.374508	1.64422	0.00013984	0.00163098	0.00113927	3579	tags=30%, list=17%, signal=25%	KLK13/ENO1/KLK6/PGK1/IFI16/TMPRSS4/CHAC1/CASP4/PYCARD/PLGRKT/F12/CASP1/ECE2/BAK1/PRSS3/STOML2/HM13/TIMM17A/PLAT/PCSK9/TMEM208/ADAM17/AOPEP/CTSL/ZMPSTE24/CST7/PSENEN/ACE2/SRGN/SEC11C/BCL2L12/PLAU/PCSK7/PCSK6/ADAM19/METAP2/PCSK1/SNX12/CARD16/LPCAT3/ADAM10/CASP8/ADAM8/FADD/CTSS/SPCS3/RCE1/FURIN/REN/PMPCA/COMP/MYH9/FXN/NLRP7/PARP1/PHEX/HTRA2/CASP3/DDI2/CIDEB/MYRF/NLRC4/BACE1/CARD18/LGMN
GOBP	REGULATION OF PHOSPHATIDYLINOSITOL 3 KINASE SIGNALING	122	-0.386956	-1.70848	0.000128599	0.00150248	0.00104951	4723	tags=45%, list=23%, signal=35%	PIP5K1C/INPP5E/PDGFB/DAB2IP/PTPN13/TEK/KDR/TGFB2/PIP4K2A/ANGPT1/GPER1/PIK3CA/UBE3A/PTEN/PIP5K1B/ERBB3/IL18/ERBB4/SIRT1/PDGFRB/AGT/INSR/LEP/F2R/IGF1R/ROR1/TWIST1/PDGFA/EGF/EGFR/PTK2/NTF3/PIK3CB/PIK3IP1/NTRK2/FN1/KLF4/FGFR1/PDGFD/ROR2/DIPK2A/MAPK1/PIP4K2B/MYOC/DCN/FYN/PPP2R5C/PIK3R1/PDGFRA/KIT/IRS2/CAT/SERPINA12/NOP53/PDGFC
GOBP	REGULATION OF OSSIFICATION	106	-0.406071	-1.76287	0.00012745	0.00149166	0.00104195	4360	tags=42%, list=21%, signal=34%	TMEM119/S1PR1/TOB2/TGFB2/RFLNB/ACVR2B/BMP2/BMP6/EGR2/ATRAID/TAC1/BMP4/ADGRV1/TFAP2A/ENPP1/DDR2/DHRS3/ATP2B1/ANO6/DKK1/TWIST1/OMD/P2RX7/GPM6B/LRP6/GREM1/PBX1/MGP/BMPR1A/PTN/MEF2C/SLC8A1/BMPR1B/SMAD3/RBPJ/MAPK1/BMP7/OSR1/ZBTB16/NBR1/ANKH/LRP4/BCL2/OSR2/ADRB2
GOBP	REGULATION OF SUPRAMOLECULAR FIBER ORGANIZATION	352	-0.291937	-1.48116	0.000125514	0.00147156	0.00102791	3843	tags=31%, list=18%, signal=26%	ARHGEF10L/APC/ELN/TRIOBP/DMTN/CAMSAP2/PIK3CA/PRKN/EFEMP2/TACSTD2/ARHGEF2/RDX/NRP1/PRKCE/TAC1/ASAP3/PXN/DLG1/WASHC1/APP/ABL1/CCN2/TENM1/WASF2/RGCC/TMSB4X/CXCL12/AEBP1/SWAP70/ATXN7/CLASP1/S100A10/EDN1/CHADL/PRUNE1/SLIT2/ARHGEF15/KANK4/RAPGEF3/ADD1/MET/FMN1/TMOD2/WASF3/FGF13/ALMS1/FER/PLEKHH2/TMSB15B/SHANK3/TESK1/BMERB1/DSTN/APOE/BIN1/VILL/DYRK1A/SORBS3/ARHGAP35/PFN2/MECP2/CLIP3/SPTAN1/NUMA1/ARHGEF5…
GOMF	METAL CLUSTER BINDING	62	0.511253	1.884	0.00012537	0.00147156	0.00102791	4690	tags=47%, list=22%, signal=36%	GLRX3/CIAPIN1/KIF4A/UQCRFS1/RSAD2/NDUFS7/SDHB/NUBP1/NDUFV2/BRIP1/XDH/ACO2/NDUFS8/DNA2/CISD3/GLRX2/NDUFV1/FECH/NUBP2/CISD1/NDUFS2/FXN/CIAO3/NDUFS1/POLD1/CISD2/ETFDH/FDX2/NTHL1
GOMF	PROTON CHANNEL ACTIVITY	20	0.700625	2.02495	0.000124928	0.00146982	0.00102669	3460	tags=65%, list=17%, signal=54%	ATP5MF/ATP5PF/ATP5F1B/ATP5PB/ATP5ME/ATP5MG/ATP5F1C/SLC4A11/ATP5PO/ATP6V1A/ATP5F1D/ATP5F1A/ATP5PD
GOBP	PHARYNGEAL SYSTEM DEVELOPMENT	23	-0.642248	-2.02692	0.000123601	0.00145675	0.00101757	4040	tags=48%, list=19%, signal=39%	TBX1/TGFB2/ADGRF5/BMP4/HES1/NOG/BMPR1A/BMP7/PTCH1/PLXNA2/GATA3
GOCC	CONDENSED NUCLEAR CHROMOSOME	87	0.459756	1.78556	0.000123263	0.00145533	0.00101657	4365	tags=41%, list=21%, signal=33%	CCNB1/NDC80/H2AX/BUB1B/NEK2/BUB1/TUBG1/HUS1/RAD51/NUF2/CENPK/CENPA/SHOC1/PLK1/RGS12/BLM/NOL6/BRCA2/RCC1/NIFK/BRCA1/PMF1/MIS12/PELI1/RRS1/SYCE3/UBE2I/CENPO/RAD50/REC8/CHMP1A/LRPPRC/KIFAP3/FKBP6/SMC1A/HORMAD1
GOMF	TRANSFORMING GROWTH FACTOR BETA ACTIVATED RECEPTOR ACTIVITY	12	-0.785505	-2.08127	0.00011428	0.00135164	0.00094414	1785	tags=50%, list=9%, signal=46%	ACVRL1/LTBP4/BMPR1A/BMPR1B/TGFBR2/TGFBR3
GOBP	CARDIAC CHAMBER MORPHOGENESIS	114	-0.388496	-1.70556	0.00011356	0.0013455	0.000939851	4733	tags=37%, list=23%, signal=29%	SEMA3C/WNT11/HEY1/TEK/MED1/TGFB2/BMP2/SAV1/SOS1/FOXC2/NRP1/PPP1R13L/BMP4/ROBO2/HES1/JAG1/TBX3/DHRS3/SOX4/SHOX2/SLIT2/NOG/CPE/PARVA/NPY5R/SLIT3/DSP/FOXC1/FGFR2/BMPR1A/MEF2C/RBP4/WNT2/RBPJ/TGFBR2/BMP7/ZFPM2/TNNC1/TPM1/NOTCH2/TGFBR3/GATA3
GOCC	ACTOMYOSIN	71	-0.451729	-1.82449	0.000109069	0.00129457	0.000904277	4751	tags=49%, list=23%, signal=38%	PDLIM2/ACTN4/CDC42BPB/SYNPO/HDAC4/TEK/SHROOM4/DAAM1/ILK/PXN/FAM107A/PDLIM5/ABLIM1/MYL9/ROR1/ACTA1/PTK2/SEPTIN7/SEPTIN11/PDLIM3/FERMT2/MYH14/MYLK/CDC42BPA/ABLIM3/LIMCH1/LPP/MYH10/NEBL/DBN1/SYNPO2/TPM1/PDLIM4/PGM5/SORBS1
GOBP	CELL FATE COMMITMENT	240	-0.323584	-1.56108	0.000107289	0.00127569	0.000891089	3139	tags=23%, list=15%, signal=20%	ERBB4/OLIG1/BMP4/WNT7B/HES1/JAG1/TBX3/LMO4/BCL11B/SOX13/MGA/NTF4/SOX8/EBF2/DKK1/JAG2/FGF13/PPARG/FZD7/TM2D3/FGFR2/HOXC10/CDC73/KLF4/BMPR1A/NR2F2/GDF7/ROR2/DOCK7/MEF2C/HOXA11/SATB2/WNT2/SMAD5/TGFB1I1/RTF1/RBPJ/GATA2/ZNF521/PTCH1/MITF/TBX15/CYP26B1/GAS1/CDON/TCF7L2/GLI2/AR/NOTCH2/GLI3/SPRY2/BCL2/SOX6/WNT2B/SOX5/GATA3
GOBP	RESPIRATORY SYSTEM DEVELOPMENT	185	-0.333972	-1.57721	0.000106967	0.00127412	0.000889994	3320	tags=31%, list=16%, signal=27%	MAN1A2/FSTL3/FGF1/BMP4/KCNAB1/WNT7B/CCN2/HES1/PDGFRB/LOX/ASXL1/YAP1/NOG/SRSF6/SP3/PDGFA/FGF9/EGFR/LIF/PGR/SPEF2/TULP3/LRP6/FGFR2/SEC24B/KLF2/BMPR1A/ATXN1L/GPC3/PTN/NPHP3/RBP4/IGFBP5/THRA/MYOCD/DAG1/ALDH1A2/SKI/WNT2/NFIB/RBPJ/MAPK1/FBXW7/TGFBR2/WDPCP/DLG5/CCBE1/ZFPM2/ABCA3/PKD1/LAMA5/PDGFRA/SPRY1/GLI2/GLI3/SPRY2/HSD11B1/WNT2B
GOBP	NUCLEOBASE CONTAINING SMALL MOLECULE BIOSYNTHETIC PROCESS	109	0.441728	1.7872	0.000106702	0.00127323	0.000889369	1988	tags=28%, list=10%, signal=26%	GDA/TYMP/UPP1/TK1/PNP/UCK2/NME1/ACOT7/NUDT15/VCP/ENTPD7/DTYMK/APRT/TDG/IMPDH1/NT5C2/HPRT1/PUDP/AMPD3/ITPA/CNP/NUDT5/XDH/DNPH1/GPX1/PDE8A/ADK/UMPS/DCTPP1/SMUG1/NUDT1
GOBP	CD4 POSITIVE ALPHA BETA T CELL ACTIVATION	92	0.464295	1.818	0.000105221	0.00125778	0.00087858	3986	tags=40%, list=19%, signal=33%	ZC3H12A/CD274/NFKBIZ/IL4R/PRKCQ/CD83/ENTPD7/STOML2/RSAD2/BCL3/STAT3/CTSL/SASH3/JAK3/IFNG/RELB/SOCS1/CBFB/IL12B/IL6/LGALS9/CCL19/IL23A/BATF/GPR183/CD86/LEF1/SEMA4A/NFKBID/XCL1/ANXA1/HLA-DRA/IL12RB1/NLRP3/MTOR/CD80/FOXP3
GOBP	NEGATIVE REGULATION OF FAT CELL DIFFERENTIATION	45	-0.540083	-2.0079	0.000104471	0.00125105	0.000873877	4368	tags=60%, list=21%, signal=48%	CCDC85B/INSIG1/CCN4/GPER1/FOXO1/SIRT1/ENPP1/JAG1/ASXL1/JDP2/WWTR1/YAP1/LRP3/ADIPOQ/ARNTL/TRIO/DDIT3/SMAD3/FERMT2/TGFB1I1/ZADH2/ZFPM2/GATA2/RUNX1T1/ZFP36L2/GATA3/RORA
GOBP	LYMPHOCYTE MIGRATION	104	0.44782	1.7955	0.000103496	0.00124158	0.000867263	4245	tags=44%, list=20%, signal=35%	C10orf99/WNT5A/CCL20/S100A7/PYCARD/CCR7/CXCL13/CYP7B1/CXCL16/CXCL10/CCL18/CCL4/CCL22/ADAM17/CH25H/CCL2/SPNS2/CCL8/ITGA4/RIPK3/CCL7/CCL19/GPR183/DOCK8/OXSR1/ADAM10/CXCL11/ITGAL/ADAM8/FADD/WASL/PIK3CD/EXT1/CRTAM/CCL5/XCL1/ICAM1/CCR2/CCL17/GCSAM/TMEM102/ZAP70/MSN/GPR15/CKLF/MYO1G
GOMF	PATTERN RECOGNITION RECEPTOR ACTIVITY	23	0.671943	1.99435	9.88e-05	0.00118772	0.000829645	3029	tags=57%, list=15%, signal=48%	NOD2/CLEC7A/PTAFR/PGLYRP4/TLR2/FCN1/CLEC4E/CD36/PGLYRP2/TRIM5/LY96/TLR8/PGLYRP3
GOBP	MORPHOGENESIS OF A BRANCHING STRUCTURE	183	-0.34933	-1.63439	9.81e-05	0.00118094	0.000824907	4763	tags=39%, list=23%, signal=31%	FAT4/WNT6/SEMA3C/DDR1/CTSH/SEMA3A/MED1/LRP5L/KDR/CTNNB1/LRP5/BMP2/TACSTD2/BTRC/FOXC2/NRP1/LGR4/PLXND1/FGF1/SETD2/CLIC4/DLG1/ABL1/FEM1B/BMP4/AGT/TBX3/RSPO3/SOX10/LRRK2/NTN4/BTBD7/SHOX2/SEMA3E/YAP1/EDN1/SLIT2/NOG/SOX8/MET/ESR1/PDGFA/EGF/PGR/LRP6/FGFR2/GREM1/PBX1/GDF7/PKD2/GPC3/HOXA11/DAG1/WNT2/RTN4/TGFBR2/BMP7/RERE/FOXD1/DLG5/PTCH1/DCHS1/PKD1/LAMA5/SPRY1/CTNNBIP1/GLI2/AR/GLI3/SPRY2/BCL2/WNT2B
GOBP	TRANSLESION SYNTHESIS	42	0.586044	2.0004	9.38e-05	0.00113135	0.000790269	4808	tags=64%, list=23%, signal=50%	PCLAF/UBE2L6/POLE2/PCNA/VCP/ISG15/RPA3/UFD1/DTL/POLD2/RFC2/RFC3/POLDIP2/MAD2L2/USP43/FAAP20/POLD4/RFC4/TRIM25/POLD3/NPLOC4/PARP10/RPA1/POLD1/SPRTN/RFC5/USP10
GOBP	REGULATION OF TYPE I INTERFERON MEDIATED SIGNALING PATHWAY	34	0.604559	1.98465	9.35e-05	0.00112951	0.000788984	3538	tags=47%, list=17%, signal=39%	IRF7/WNT5A/MMP12/PTPN2/IKBKE/USP18/ABCE1/TBK1/TTLL12/ADAR/NLRC5/FADD/CDC37/IFNAR2/YTHDF2/SAMHD1
GOBP	INTERLEUKIN 8 PRODUCTION	82	0.468194	1.79998	9.32e-05	0.00112868	0.000788401	4406	tags=45%, list=21%, signal=36%	WNT5A/NOD2/CLEC7A/MYD88/AFAP1L2/PYCARD/BCL3/TLR2/STAT3/CD2/LAMTOR5/IL1B/NOS2/RAB1A/FCN1/SYK/IL6/LGALS9/PTPN22/FFAR2/CD58/FADD/PARK7/TLR8/TNF/DDX58/ANXA1/ARRB1/BCL10/CD244/LILRA2/SERPINE1/IL10/IL17F/C5AR2/NLRP10/PTPRC
GOBP	SIGNAL TRANSDUCTION INVOLVED IN CELL CYCLE CHECKPOINT	74	0.492016	1.85496	9.18e-05	0.00111283	0.000777329	3325	tags=41%, list=16%, signal=34%	CCNB1/CDK1/TFDP1/PCNA/AURKA/ZWILCH/PLK2/SFN/E2F8/DTL/CNOT11/CDKN1A/PLK1/PLK3/CNOT1/PRKDC/CHEK2/BRCC3/BABAM2/TRIAP1/BRCA1/CDK2/CRADD/CDC25C/PML/BAX/GADD45A/PRMT1/MDM2/CNOT6
GOBP	NEGATIVE REGULATION OF SUPRAMOLECULAR FIBER ORGANIZATION	152	-0.364426	-1.66211	9.05e-05	0.00109997	0.000768348	3828	tags=37%, list=18%, signal=30%	APC/TRIOBP/DMTN/CAMSAP2/PIK3CA/PRKN/TACSTD2/ARHGEF2/RDX/WASF2/TMSB4X/SWAP70/ATXN7/CLASP1/CHADL/SLIT2/KANK4/ADD1/MET/TMOD2/FGF13/PLEKHH2/TMSB15B/SHANK3/BMERB1/APOE/VILL/DYRK1A/PFN2/CLIP3/SPTAN1/MAP2/SNCA/CAMSAP3/ARHGAP6/TTBK2/SCIN/FHOD3/SVIL/MYOC/EPS8/SPTBN2/CORO2B/PFDN5/MYADM/PIK3R1/ADD3/LMOD1/DLC1/TMOD1/CGNL1/GSN/KANK1/SPTBN1/CRYAB/MAP1B
GOCC	PROTEASOME CORE COMPLEX BETA SUBUNIT COMPLEX	10	0.829768	2.00382	9.03e-05	0.0010991	0.000767742	3025	tags=90%, list=14%, signal=77%	PSMB2/PSMB5/PSMB6/PSMB10/PSMB3/PSMB8/PSMB9/PSMB1/PSMB7
GOBP	POSITIVE REGULATION OF MITOTIC CELL CYCLE	106	0.442845	1.78518	8.91e-05	0.00108639	0.000758858	3972	tags=43%, list=19%, signal=35%	CCNB1/DLGAP5/CDK1/TFDP1/EIF4EBP1/UBE2C/CDCA5/EIF4E/RAB11A/CDC6/CDC25B/ADAM17/CDC25A/DTL/ANAPC7/KLHL18/CDT1/ESPL1/LSM10/TTL/POLDIP2/BRCA2/RCC2/SMARCD3/CDC7/CCND2/FBXO5/MAD2L1BP/TMOD3/ANAPC11/MTA3/PLRG1/CDC25C/RB1/MDM2/EIF4G1/ANXA1/CDC23/PHB2/ASNS/USP2/CCND3/LGMN/CDK4/SPHK1/UBE2E2
GOBP	REGULATION OF CYTOSKELETON ORGANIZATION	491	-0.266324	-1.39405	8.88e-05	0.00108406	0.000757231	3156	tags=26%, list=15%, signal=23%	CLIC4/PXN/DLG1/WASHC1/ABL1/CCN2/CEP120/PDGFRB/TENM1/WASF2/RGCC/BCAS3/TMSB4X/CXCL12/TPR/FAM107A/EFNA5/SEMA3E/SWAP70/BST1/ATXN7/CLASP1/CENATAC/S100A10/EDN1/SYDE1/PRUNE1/SLIT2/ARHGEF15/MAP6/TRAF3IP1/KANK4/RHOBTB1/FZD10/RAPGEF3/RHOQ/ADD1/NEXN/MET/CHMP4B/FMN1/PDGFA/TMOD2/WASF3/FGF13/ALMS1/FER/P2RX7/PLEKHH2/TMSB15B/SHANK3/TESK1/BMERB1/GPM6B/DSTN/BIN1/VILL/DYRK1A/SORBS3/PTK2/ARHGAP35/NTF3/PAM/PFN2/MECP2…
GOBP	REGULATION OF LEUKOCYTE MEDIATED CYTOTOXICITY	73	0.486684	1.83574	8.56e-05	0.00104755	0.000731731	5048	tags=56%, list=24%, signal=43%	SERPINB4/DNASE1L3/CYRIB/ARG1/NOS2/RAET1E/IL12B/SERPINB9/RASGRP1/IL18RAP/IL7R/RIPK3/LGALS9/SH2D1A/IL23A/LAG3/CXCL6/FADD/HLA-E/NCR3/CRTAM/XCL1/KLRD1/CD1B/HLA-DRA/ICAM1/IL12RB1/TYROBP/B2M/HLA-F/HLA-B/LILRB1/NECTIN2/HLA-G/VAV1/CD1D/PTPRC/AGER/ARRB2/HLA-A/SLAMF6
GOBP	ESTABLISHMENT OF TISSUE POLARITY	121	0.428901	1.76497	8.55e-05	0.00104755	0.000731731	2469	tags=33%, list=12%, signal=29%	PSME2/PSMB2/WNT5A/PSMA5/PSMB5/FZD5/AP2S1/PSMA3/PSMD12/PSME4/PSMA2/PSME1/GRHL3/PSMB6/PSMB10/PSMB3/PSMD6/PSMB8/PSMC4/PSMA4/PSMD2/PSMD11/PSMD1/PSMD14/PSMC3/PSMB9/PSMA7/PSMD9/PSMD8/PSMA1/PSMD13/PSMF1/PSMC5/PSMC2/PSMB1/PSMC6/PSME3/PSMD7/PSMC1/TP63
GOBP	MRNA EXPORT FROM NUCLEUS	105	0.442278	1.77581	8.32e-05	0.00102165	0.000713642	4158	tags=45%, list=20%, signal=36%	EIF4A3/DDX39A/EIF4E/HNRNPA2B1/NCBP1/SRSF9/NUP37/NUP210/NUP88/CPSF3/ALYREF/MAGOHB/NUP50/SARNP/NSUN2/SRSF2/NXT1/POLR2D/RAE1/SRSF7/SEC13/SRSF1/THOC5/IWS1/NUP155/THOC6/THOC7/NDC1/CPSF4/GLE1/MAGOH/NUP188/DDX19A/WDR33/NUP85/FYTTD1/CHTOP/NUP205/EIF5A/AGFG1/UPF1/ENY2/NUP58/NUP107/NUP93/SRSF3/POM121
GOCC	PIGMENT GRANULE	105	0.44351	1.78076	8.07e-05	0.000992666	0.000693393	4573	tags=45%, list=22%, signal=35%	RAB38/RAN/MREG/AHCY/GGH/DNAJC5/CTSB/ATP6V1B2/RAB27A/ATP1B3/HSPA5/PRDX1/SLC2A1/CNP/RAB5A/RAB1A/P4HB/HSPA8/GPR143/MYO5A/SYNGR1/SLC3A2/CTNS/CTSD/PDIA4/PMEL/TFRC/SND1/RPN1/PDIA6/PDCD6IP/YWHAZ/CANX/ATP1A1/PPIB/TYRP1/CAPG/MLANA/STX3/TMEM33/SLC1A5/SLC1A4/RAB29/MYO7A/TPP1/TYR/SLC45A2
GOBP	TELOMERASE RNA LOCALIZATION	19	0.722714	2.07581	8.05e-05	0.000991851	0.000692824	2945	tags=68%, list=14%, signal=59%	RUVBL1/CCT5/RUVBL2/NHP2/CCT2/CCT3/NOP10/CCT7/TCP1/SHQ1/DKC1/CCT6A/CCT8
GOBP	RESPONSE TO RADIATION	434	0.31852	1.48604	7.99e-05	0.000987319	0.000689658	4917	tags=36%, list=24%, signal=28%	PCLAF/SERPINB13/IFI16/SLC7A11/H2AX/PBK/COPS3/TIGAR/AURKB/IVL/NABP1/PCNA/RUVBL2/POLB/BAK1/HIF1A/NMT1/MAPK13/FKBPL/HUS1/RAD51/METAP1/EIF2S1/MMP9/HSPA5/CXCL10/FEN1/BCL3/ECT2/CDC25A/NDRG4/COPS9/ZMPSTE24/DTL/RGS14/RAD51AP1/AEN/PPP1CA/MYC/PNKP/FIGNL1/CDK5/DNMT3B/MMP1/IL12B/CDKN1A/XRCC6/FANCD2/GPX1/SOD2/UBE2A/RRM1/PLK3/BLM/ST20/XRCC5/CCL7/BRCA2/FECH/CTNS/SMPD1/RNF168/THBD/METAP2/NR2F6/NOC2L/HRAS/PRKDC/C…
GOCC	PRERIBOSOME SMALL SUBUNIT PRECURSOR	15	0.7556	2.04378	7.93e-05	0.000981516	0.000685605	3370	tags=60%, list=16%, signal=50%	TSR1/BYSL/RRP1/NOC4L/NOP14/FAM207A/RIOK1/NOB1/RIOK2
GOBP	TRANSFORMING GROWTH FACTOR BETA RECEPTOR SIGNALING PATHWAY	187	-0.348838	-1.64969	7.89e-05	0.000978351	0.000683394	5601	tags=45%, list=27%, signal=34%	SMAD2/GDF15/RNF111/CIDEA/RHOA/NLK/FBN1/GDF10/COL1A2/FLCN/EP300/NRROS/SMAD4/CDH5/STUB1/LATS1/BAMBI/GDF9/LEMD3/RASL11B/PEG10/PDPK1/HTRA1/USP9X/UBC/LRRC32/ITGB8/APPL1/TGFB2/SMURF1/LTBP2/LDLRAD4/MSTN/SLC2A10/GCNT2/TGFBRAP1/CGN/HTRA4/PXN/SIRT1/SPRED2/PTPRK/DAB2/LOX/GLG1/SNW1/CD109/SPRED1/FUT8/FOS/TRIM33/LATS2/CLDN5/ACVRL1/SNX25/CREBBP/DKK3/LTBP4/PTK2/HPGD/SMURF2/PMEPA1/BMPR1A/PPARA/ZMIZ1/SDCBP/SMAD9/M…
GOBP	RIBOSE PHOSPHATE BIOSYNTHETIC PROCESS	186	0.384202	1.65527	7.66e-05	0.000950912	0.000664228	4401	tags=38%, list=21%, signal=30%	ENO1/ATP5MF/UPP1/UCK2/AK2/NME1/ACOT7/CTPS1/PYGL/VCP/ATP5MC3/ATP5PF/GART/ATP5F1B/STOML2/ATP5MC1/APRT/ATIC/IMPDH1/HPRT1/ATP5PB/ALDOA/SLC25A13/ELOVL7/AMPD3/ADSL/ATP5ME/COASY/AK1/ATP5MG/ATP5F1C/ADK/UMPS/PPT2/UQCC3/HACD1/GSTZ1/ATP5PO/ATP6V1A/GMPS/ANTKMT/ACACA/PDHB/ADCY3/GCDH/TREM2/PPCDC/PKM/ATP5F1D/PARP1/PRPSAP2/G6PD/ATP5F1A/ELOVL4/DLAT/PAPSS2/DLD/ATP5PD/RFK/ELOVL1/PANK2/VPS9D1/NME7/CAD/PRPS2/TKT/DNAJ…
GOCC	90S PRERIBOSOME	27	0.655061	2.0355	7.65e-05	0.000950912	0.000664228	3641	tags=59%, list=17%, signal=49%	RRP36/WDR12/IMP4/NOL6/UTP4/NOC4L/BOP1/NOP14/FAM207A/NOC2L/UTP6/PES1/RRP7A/TBL3/WDR3/HEATR1
GOBP	CD4 POSITIVE ALPHA BETA T CELL DIFFERENTIATION	78	0.483009	1.84044	7.64e-05	0.000950912	0.000664228	3986	tags=42%, list=19%, signal=34%	ZC3H12A/NFKBIZ/IL4R/CD83/ENTPD7/RSAD2/BCL3/STAT3/CTSL/SASH3/JAK3/IFNG/RELB/SOCS1/CBFB/IL12B/IL6/LGALS9/CCL19/IL23A/BATF/GPR183/CD86/LEF1/SEMA4A/NFKBID/ANXA1/HLA-DRA/IL12RB1/NLRP3/MTOR/CD80/FOXP3
GOBP	RIBONUCLEOSIDE TRIPHOSPHATE BIOSYNTHETIC PROCESS	65	0.511293	1.90026	7.6e-05	0.000949339	0.000663129	4092	tags=49%, list=20%, signal=40%	ENO1/ATP5MF/UCK2/NME1/CTPS1/VCP/ATP5MC3/ATP5PF/ATP5F1B/STOML2/ATP5MC1/IMPDH1/ATP5PB/ALDOA/SLC25A13/ATP5ME/ATP5MG/ATP5F1C/UQCC3/ATP5PO/ATP6V1A/ANTKMT/TREM2/PKM/ATP5F1D/PARP1/ATP5F1A/ATP5PD/VPS9D1/NME7/CAD/DNAJC30
GOBP	DNA STRAND ELONGATION INVOLVED IN DNA REPLICATION	19	0.723776	2.07886	7.57e-05	0.000947064	0.00066154	3406	tags=68%, list=16%, signal=57%	GINS3/PCNA/GINS2/MCM4/GINS1/POLE3/POLD2/MCM7/MCM3/DNA2/RFC3/RFC4/POLD3
GOMF	THREONINE TYPE ENDOPEPTIDASE ACTIVITY	13	0.790041	2.04691	7.51e-05	0.000940963	0.000657278	3025	tags=77%, list=14%, signal=66%	PSMB2/PSMB5/PSMB6/PSMB10/PSMB3/PSMB8/PSMA4/PSMB9/PSMB1/PSMB7
GOBP	RESPONSE TO OXIDATIVE STRESS	421	0.320429	1.48998	7.31e-05	0.000917386	0.000640809	3743	tags=30%, list=18%, signal=25%	GJB2/ZC3H12A/CYCS/MELK/PSMB5/PPIF/ATOX1/HMOX2/SLC7A11/GCH1/GPX2/S100A7/CCR7/NUDT15/PCNA/MACROH2A1/SRXN1/GSTP1/VRK2/BAK1/HIF1A/EZH2/MAPK13/NCOA7/CCNA2/SLC23A2/EIF2S1/NDUFB4/MMP9/SMPD3/PPARGC1B/CFLAR/VNN1/PPIA/ERO1A/ATP2A2/ADPRS/TXNRD1/ECT2/PNPT1/LDHA/ARG1/RGS14/FOSL1/MEAK7/PRDX1/TRAP1/CHCHD2/DUOX1/NDUFA6/PNKP/P4HB/PDCD10/ROMO1/HMOX1/FANCD2/GPX1/PDE8A/SOD2/NDUFS8/NAPRT/IL18RAP/NR4A3/IL6/CYP2E1/ENDO…
GOBP	NCRNA TRANSCRIPTION	107	0.446089	1.79571	6.93e-05	0.000871616	0.000608838	4534	tags=45%, list=22%, signal=35%	GTF3C6/NABP1/MACROH2A1/IPPK/POLR2H/ELL2/NCBP1/POLR2F/MARS1/SIRT7/PIH1D1/ZC3H8/INTS13/GTF2A2/POLR2L/GTF2E2/TAF13/POLR2G/NPM3/POLR2D/POLR1B/NIFK/ELL/INTS7/MACROH2A2/CDK7/POLR2E/POLR1G/GTF2E1/INTS5/SMARCA4/TAF11/INTS9/CDK9/NOL11/GTF2B/INTS14/POLR2I/NABP2/MTOR/GTF3C2/RPRD1B/CCNK/PWP1/POLR2J/TAF5/TAF1B/NCL
GOCC	INTRINSIC COMPONENT OF ORGANELLE MEMBRANE	388	0.329265	1.51978	6.82e-05	0.000859023	0.000600042	5271	tags=41%, list=25%, signal=32%	MREG/SFXN1/SCO2/RER1/GHITM/MFN1/SLC35B1/DNAJC5/MCUB/ATP10B/BAK1/DHRS9/DPAGT1/HSPA5/HM13/TIMM17A/TAP1/SPPL2A/TIMM23/ABCB6/MTX2/HSPA9/TMEM70/ZMPSTE24/MICOS10/TMEM177/TAP2/ELOVL7/STX6/BCAP31/TOMM40/YIF1A/COA1/YIF1B/RAB5A/SCO1/PEX3/SFXN4/BID/MICOS13/TMCO1/COA3/EMC6/CCDC51/UBXN8/MTX1/CHCHD3/SFXN2/COQ2/IMMT/MTLN/EDEM1/SYNGR1/EMC3/CYP2E1/EMC8/PREB/UQCC3/PCSK7/DERL2/EMC9/TMEM163/HACD1/NPC1/PET100/GDAP1/A…
GOBP	OSSIFICATION	373	-0.294081	-1.50218	6.75e-05	0.000852301	0.000595346	4814	tags=37%, list=23%, signal=29%	PKDCC/NF1/CTHRC1/TWIST2/FAT4/FASN/WNT11/CDK6/KREMEN2/COL6A1/HDAC4/MN1/TOB1/TEK/TMEM119/S1PR1/LRP5L/CRIM1/TOB2/SNRNP200/IGSF10/CCN4/TGFB2/RFLNB/RSL1D1/LRP5/ACVR2B/BMP2/MMP2/BMP6/EGR2/INPPL1/TAPT1/BPNT2/ATRAID/FOXC2/ATP6V0A4/TNN/LGR4/VEGFC/FGFR3/CREB3L1/TAC1/FSTL3/ATP6V1B1/BMP4/RORB/WNT7B/ADGRV1/CCN2/GNAS/RPS15/MMP16/PTH1R/PRKD1/TFAP2A/ASF1A/ENPP1/LOX/FZD1/SLC26A2/JAG1/THBS3/DDR2/DHRS3/ZBTB40/WWTR1…
GOCC	CONDENSED CHROMOSOME OUTER KINETOCHORE	14	0.777346	2.05381	6.75e-05	0.000852301	0.000595346	1507	tags=64%, list=7%, signal=60%	CCNB1/NDC80/BUB1B/BUB1/CENPF/SKA3/SKA2/SKA1/PLK1
GOBP	SIGNAL TRANSDUCTION BY P53 CLASS MEDIATOR	257	0.355211	1.58854	6.62e-05	0.000839169	0.000586173	4898	tags=41%, list=23%, signal=32%	CCNB1/IFI16/CDK1/TFDP1/FOXM1/AURKB/PYCARD/HDAC1/PCNA/AURKA/TPX2/SMYD2/HUS1/RPA3/PLK2/BCL3/PRMT5/SFN/E2F8/ZMPSTE24/NOP2/AEN/EXO1/EEF1E1/MIF/BRIP1/CNOT11/CDK5/TAF10/CDKN1A/BCL2L12/RFC2/CSNK2A1/DNA2/MYBBP1A/PLK3/BLM/SESN2/RFC3/PRMT6/BRCA2/BOP1/BATF/RRP8/WWOX/CNOT1/ARMC10/NOC2L/TAF13/RPF2/CHEK2/E2F2/BDKRB2/BOK/TP63/TRIAP1/HIPK2/BRCA1/HDAC2/CDK2/CRADD/MEAF6/CDC25C/PML/BAX/ING2/TAF11/GADD45A/PRMT1/TOP3…
GOBP	NEGATIVE REGULATION OF LEUKOCYTE MEDIATED IMMUNITY	52	0.54774	1.96318	6.61e-05	0.000839169	0.000586173	5251	tags=62%, list=25%, signal=46%	SERPINB4/NOD2/SUSD4/ARG1/JAK3/HMOX1/SERPINB9/IL7R/LGALS9/LILRB4/HLA-E/BST2/XCL1/KLRD1/CLEC4G/CD96/CCR2/HLA-F/HLA-B/LILRB1/HLA-G/CD300A/FOXP3/PARP3/CR1/PTPRC/FOXF1/TBX21/ARRB2/IFNA2/HLA-A/C4BPA
GOBP	REGULATION OF CELL KILLING	92	0.472275	1.84925	6.51e-05	0.000828557	0.00057876	3933	tags=46%, list=19%, signal=37%	SERPINB4/KRT6A/CLEC7A/DNASE1L3/CYRIB/ARG1/PRF1/IFNG/NOS2/RAET1E/IL12B/SERPINB9/RASGRP1/SYK/IL18RAP/IL7R/RIPK3/LGALS9/SH2D1A/IL23A/LAG3/CXCL6/CASP8/FADD/HLA-E/NCR3/CRTAM/XCL1/KLRD1/CD1B/HLA-DRA/ICAM1/IL12RB1/TYROBP/B2M/HLA-F/CR1L/HLA-B/LILRB1/NECTIN2/HLA-G/VAV1
GOBP	INOSITOL LIPID MEDIATED SIGNALING	187	-0.350817	-1.65904	6.49e-05	0.000826752	0.000577499	3812	tags=34%, list=18%, signal=28%	PIP4K2A/PREX2/ANGPT1/GPER1/PLD1/PIK3CA/UBE3A/PTEN/PIP5K1B/ERBB3/IL18/ERBB4/SIRT1/PDGFRB/AGT/PLCH2/PEAR1/INSR/LEP/EDN1/PLCB1/F2R/IGF1R/ROR1/TNFAIP8L3/TWIST1/PDGFA/EGF/EGFR/OGT/PTK2/PLCL2/NTF3/PIK3CB/PIK3IP1/NTRK2/ZFP36L1/FN1/KLF4/FGFR1/PDGFD/ROR2/DIPK2A/PLCB4/MAPK1/PIP4K2B/MYOC/DCN/FYN/PLEKHA1/PPP2R5C/IRS1/PIK3C2G/PIK3R1/PDGFRA/KIT/GSN/GAB2/IRS2/CAT/SERPINA12/NOP53/PDGFC/GATA3
GOBP	ENDOCARDIAL CUSHION DEVELOPMENT	42	-0.56692	-2.07512	6.38e-05	0.000815339	0.000569527	5071	tags=50%, list=24%, signal=38%	RBM24/SMAD4/HEY1/MSX1/TMEM100/CRELD1/TGFB2/BMP2/ERBB3/BMP4/ROBO2/JAG1/NOG/TWIST1/ACVRL1/BMPR1A/RBPJ/MDM4/TGFBR2/BMP7/DCHS1
GOBP	NEGATIVE REGULATION OF CELL SUBSTRATE ADHESION	60	-0.495076	-1.92468	6.36e-05	0.000813397	0.000568171	4702	tags=52%, list=23%, signal=40%	ACTN4/MELTF/LRP1/PHLDB2/ACER2/DMTN/TACSTD2/PTEN/GCNT2/SPOCK1/BCAS3/JAG1/FAM107A/EFNA5/SEMA3E/APOD/ACVRL1/FZD7/LGALS1/ARHGAP6/FBLN1/PTPRO/NEXMIF/MYOC/FZD4/BCL6/CORO2B/PIK3R1/DLC1/POSTN/KANK1
GOBP	DICARBOXYLIC ACID METABOLIC PROCESS	92	0.472787	1.85125	6.26e-05	0.000802142	0.000560309	3758	tags=40%, list=18%, signal=33%	KYNU/GOT2/SLC7A11/GOT1/GPT2/SHMT2/MDH2/ATIC/MTHFD1/MTHFD2/HAL/SDHB/ALDH4A1/IDH2/MTRR/NAGS/MRPS36/GLUL/NIT2/FH/GCLM/PCK2/MTHFD1L/DHFR/MDH1/SDHAF3/L2HGDH/ME1/SLC19A1/KYAT3/ALDH5A1/GCLC/DLD/ME2/GAD1/SLC25A32/MTHFR
GOMF	THREONINE TYPE PEPTIDASE ACTIVITY	20	0.714993	2.06648	6.12e-05	0.000786038	0.00054906	3526	tags=55%, list=17%, signal=46%	PSMB2/PSMB5/PSMB6/PSMB10/PSMB3/PSMB8/PSMA4/PSMB9/PSMB1/PSMB7/BACE1
GOBP	REGULATION OF MITOCHONDRIAL GENE EXPRESSION	29	0.655735	2.05772	6.1e-05	0.000785132	0.000548428	4705	tags=72%, list=23%, signal=56%	C1QBP/TSFM/SHMT2/TACO1/FASTKD2/TRUB2/MTG1/TRMT10C/COA3/UQCC2/MPV17L2/MRPS27/RCC1L/METTL4/MTG2/FASTKD3/LRPPRC/UQCC1/MALSU1/RPUSD3/CHCHD10
GOBP	HOMOPHILIC CELL ADHESION VIA PLASMA MEMBRANE ADHESION MOLECULES	149	-0.373562	-1.69925	6.04e-05	0.000778502	0.000543796	5268	tags=40%, list=25%, signal=30%	PCDHB3/CDH6/PCDH8/AMIGO2/PCDHGA10/PCDHB6/CDH5/PCDHGA3/FAT4/DSC1/TRO/PCDHB12/PTPN23/PCDHB13/OBSL1/PCDH12/CDHR3/AMIGO1/PCDHB11/CADM1/ROBO3/NECTIN3/DSG1/IGSF11/ROBO2/FAT3/PCDH9/CDH10/PCDHB7/PCDHB14/PECAM1/NPTN/PTPRM/L1CAM/CLSTN1/MYOT/PCDHB2/PCDHB10/PCDH19/PCDH18/PCDHB4/NEXN/PCDHB5/ROBO4/CNTN4/CADM3/DSG2/ITGB1/CDH12/CDH19/CLSTN2/PCDH20/PCDHGA8/DCHS1/PKD1/PCDHB16/PCDHGA4/PCDH7/CDHR1
GOBP	SMOOTH MUSCLE CONTRACTION	95	-0.428922	-1.83436	6.01e-05	0.000776917	0.000542689	2762	tags=35%, list=13%, signal=30%	GPER1/EDN3/SETD3/DLG1/TBX3/RGS2/ATP2B1/EDN1/F2R/DOCK5/DOCK4/TACR1/ARHGAP42/SLC8A1/P2RX1/ORMDL3/MYOCD/KCNMA1/ROCK2/ADRA1A/PRKG1/ACTA2/ATP2B4/MYLK/ATP1A2/ADRA2A/CNN1/MYH11/BBS2/KIT/CAV1/SOD1/ADRB2
GOBP	T CELL MEDIATED IMMUNITY	97	0.46366	1.83591	5.92e-05	0.000765796	0.000534921	5020	tags=55%, list=24%, signal=42%	NOD2/FZD5/CTSC/RAB27A/RSAD2/CYRIB/HPRT1/ARG1/SASH3/PRF1/IL1B/IL12B/IL7R/IL6/RIPK3/IL23A/FADD/LILRB4/HLA-E/TNFRSF1B/HSPD1/CD8A/XCL1/KLRD1/CD1B/CLEC4G/HLA-DRA/ICAM1/IL12RB1/DENND1B/CCR2/B2M/HLA-F/WAS/HLA-B/LILRB1/BTN3A3/NECTIN2/NLRP3/HLA-G/FOXP3/TRAF2/FBXO38/EMP2/MYO1G/CD1D/PTPRC/MALT1/AGER/AIRE/TBX21/IFNA2/HLA-A
GOBP	ACTIN MEDIATED CELL CONTRACTION	115	-0.400874	-1.75631	5.91e-05	0.000765796	0.000534921	2151	tags=26%, list=10%, signal=24%	CACNB2/ACTC1/PARVA/FGF13/ACTA1/MYH3/EPDR1/TNNC2/DSG2/ANK2/DSP/BIN1/TNNT1/PLN/AKAP9/TPM2/SCN3B/TNNC1/ATP1A2/VIM/DES/TNNI2/LIMCH1/GPD1L/CACNA2D1/DMD/TPM1/TMOD1/GSN/CAV1
GOBP	NEGATIVE REGULATION OF NEURON PROJECTION DEVELOPMENT	128	-0.390749	-1.74007	5.82e-05	0.00075575	0.000527904	4765	tags=42%, list=23%, signal=33%	SEMA4C/SEMA3C/INPP5F/LRP1/SEMA3A/CERS2/PTPN9/LRIG2/RUFY3/UBE3A/SEMA6D/PTEN/NRP1/SPOCK1/EFNB3/BAG5/ADCY6/NR2F1/MYLIP/RTN4R/LRRK2/ZNF365/SEMA3E/NGEF/DENND5A/SPART/SEMA4G/NLGN1/TSKU/SEMA6A/EFNA1/FGF13/SEMA3B/RYK/APOE/PTPRS/LGALS1/TRAK2/ITM2C/MAP2/NTN1/PTPRO/RTN4/CBFA2T2/TSC1/RTN4RL1/SEMA3G/LPAR1/VIM/RGMA/DPYSL3/LRP4/EFNB2/KANK1
GOCC	SPLICEOSOMAL TRI SNRNP COMPLEX	32	0.617834	1.99451	5.8e-05	0.000754779	0.000527225	2761	tags=53%, list=13%, signal=46%	SNRPG/SNRPF/SNRPD1/LSM2/TXNL4A/LSM7/SNRPD3/EFTUD2/SNU13/PPIH/LSM5/LSM4/SNRPB/PRPF31/USP39/LSM6/PRPF4
GOBP	CELL DIFFERENTIATION INVOLVED IN KIDNEY DEVELOPMENT	58	-0.508304	-1.9883	5.75e-05	0.000750142	0.000523986	3538	tags=48%, list=17%, signal=40%	FOXC2/LGR4/BMP4/HES1/JAG1/ASXL1/WWTR1/YAP1/ADIPOQ/LIF/GLIS2/MTSS1/PODXL/GREM1/POU3F3/LAMB2/MEF2C/IQGAP1/PTPRO/CD34/ACTA2/OSR1/PTCH1/KLF15/MAGI2/NOTCH2/GLI3/GATA3
GOBP	ACTIN FILAMENT BUNDLE ORGANIZATION	150	-0.383601	-1.7482	5.66e-05	0.000739252	0.000516379	4675	tags=41%, list=22%, signal=32%	WNT11/SYNPO/PAK2/SHTN1/PHLDB2/S1PR1/FRMD7/RFLNB/PHACTR1/ARHGEF10L/FAM171A1/ELN/DMTN/PRKN/TACSTD2/RDX/NRP1/TAC1/ASAP3/PXN/ABL1/MICAL1/CCN2/WASF2/RGCC/FAM107A/SWAP70/CLASP1/S100A10/ARHGEF15/RAPGEF3/ADD1/MET/NEDD9/ALMS1/SHANK3/TESK1/SORBS3/PFN2/ARHGEF5/CALD1/AIF1L/ROCK2/ARHGAP6/SMAD3/FERMT2/SDC4/MYOC/TSC1/LPAR1/EPS8/LIMCH1/CORO2B/PIK3R1/ITGB5/DLC1/DPYSL3/SYNPO2/TPM1/CGNL1/SORBS1/ARHGEF10
GOBP	REGULATION OF MUSCLE CELL DIFFERENTIATION	128	-0.391402	-1.74298	5.64e-05	0.000738027	0.000515523	5524	tags=48%, list=26%, signal=36%	CAMK1/MYLK3/PAK1/DLL1/IGF1/RBM24/SMAD4/TRIM32/TBX1/MAMSTR/PDGFB/AKAP6/HDAC4/PI16/MSX1/TMEM119/CTNNB1/KAT2A/HDAC9/HDAC5/PLPP7/ANKRD17/BMP2/PARP2/GPER1/EFEMP2/SETD3/SIRT1/ABL1/BMP4/RBM4/RGS2/SHOX2/EDN1/CCN3/DKK1/FGF9/CTNNA1/FZD7/NFATC2/FGFR2/GREM1/MECP2/PPARA/MEF2C/MYOCD/NLN/RBPMS2/PDCD4/CYP26B1/NFATC1/BHLHE41/PRDM6/BNIP2/CDON/PIAS1/KIT/BCL2/SOX6/EFNB2/MEF2A/BOC
GOBP	REGULATION OF BMP SIGNALING PATHWAY	85	-0.448769	-1.87483	5.55e-05	0.000728077	0.000508574	6342	tags=58%, list=30%, signal=40%	CCN1/SOX11/CTDSPL2/SMAD7/HOXA13/TMPRSS6/SFRP4/SMAD2/SFRP1/SFRP2/FBN1/SMAD4/CDH5/BAMBI/LEMD3/HTRA1/MSX1/TOB1/CRIM1/SMURF1/SORL1/FSTL1/SFRP5/FSTL3/ABL1/BMP4/HES1/NOG/SPART/TRIM33/PPARG/NBL1/ACVRL1/GREM1/SMURF2/NUMA1/GPC3/NEO1/CHRDL1/SKI/RBPMS2/RBPJ/FOXD1/TFAP2B/ELAPOR2/ZNF423/FST/NOTCH2/GREM2
GOBP	MATURATION OF 5 8S RRNA	35	0.610486	2.02173	5.47e-05	0.000719587	0.000502643	3999	tags=51%, list=19%, signal=42%	MPHOSPH6/EXOSC4/WDR12/EIF6/EXOSC3/RRP15/BOP1/NOP14/RPP40/PRKDC/EXOSC2/ERI1/PES1/ERI2/ABT1/RRS1/EXOSC8/NOL9
GOBP	DNA SYNTHESIS INVOLVED IN DNA REPAIR	53	0.546356	1.96703	5.45e-05	0.000717468	0.000501163	4808	tags=55%, list=23%, signal=42%	PCLAF/UBE2L6/POLE2/PCNA/VCP/ISG15/RPA3/UFD1/DTL/POLD2/RFC2/RFC3/POLDIP2/MAD2L2/USP43/FAAP20/POLD4/RFC4/TRIM25/POLD3/NPLOC4/CDKN2D/PARP10/RPA1/POLD1/WRNIP1/SPRTN/RFC5/USP10
GOBP	CARDIAC MUSCLE CELL DIFFERENTIATION	95	-0.429579	-1.83717	5.43e-05	0.000717074	0.000500888	4119	tags=37%, list=20%, signal=30%	OBSL1/KAT2A/BMP2/PARP2/CBY1/BMP4/PDGFRB/TBX3/BVES/RGS2/PDLIM5/SHOX2/EDN1/DKK1/ACTC1/FZD7/CACYBP/GREM1/SORBS2/PPARA/MEF2C/SLC8A1/MYOCD/AKAP13/ADRA1A/FHOD3/RBPJ/TSC1/SGCB/NEBL/PDGFRA/MYH11/SOX6/EFNB2/MEF2A
GOBP	POSITIVE REGULATION OF STRESS FIBER ASSEMBLY	52	-0.527142	-2.00861	5.36e-05	0.000708872	0.000495158	3843	tags=46%, list=18%, signal=38%	ARHGEF10L/NRP1/TAC1/PXN/ABL1/CCN2/RGCC/S100A10/ARHGEF15/RAPGEF3/TESK1/SORBS3/PFN2/ARHGEF5/ROCK2/SMAD3/FERMT2/SDC4/MYOC/TSC1/LPAR1/LIMCH1/TPM1/ARHGEF10
GOBP	PROTEIN TRANSMEMBRANE IMPORT INTO INTRACELLULAR ORGANELLE	33	0.630247	2.04883	5.31e-05	0.000703365	0.000491312	3472	tags=58%, list=17%, signal=48%	GRPEL1/TIMM50/TIMM17A/TIMM23/TOMM40L/AIFM1/TOMM40/CHCHD4/ROMO1/DNAJC15/PEX10/TIMM44/TIMM21/HSPD1/GRPEL2/DNLZ/PEX13/PEX2/TIMM17B
GOBP	RNA PHOSPHODIESTER BOND HYDROLYSIS ENDONUCLEOLYTIC	74	0.500533	1.88707	5.17e-05	0.000687029	0.000479901	5169	tags=51%, list=25%, signal=39%	ZC3H12A/TSR1/RNASEH2A/FEN1/EXO1/CPSF3/RIDA/ELAC2/ENDOU/ZC3H12C/ZC3H12D/ENDOG/BOP1/NOP14/RPP40/POP5/SND1/ABT1/POP4/TSEN34/POP1/NOB1/TBL3/KHNYN/MRPL44/RRS1/SLFN13/POP7/RPP30/NOL9/RPP38/EXOG/TSEN2/ENDOV/BMS1/APEX1/NUDT16L1/RNASET2
GOBP	EMBRYONIC ORGAN MORPHOGENESIS	268	-0.320348	-1.56493	5.03e-05	0.000668779	0.000467153	3538	tags=28%, list=17%, signal=24%	FOXC2/MIB1/MAFB/IFT172/IFT52/SETD2/HOXD9/MFAP2/DLG1/ATP6V1B1/BMP4/HES1/GNAS/MMP16/TFAP2A/HOXB5/AHI1/TBX3/SHOX2/YAP1/EDN1/DYNC2I1/NOG/HOXB6/DVL2/FZD3/HOXC4/HOXB2/SP3/EFNA1/TWIST1/MFAP5/PCGF2/TULP3/HOXD4/LRP6/FGFR2/SEC24B/PKD2/SOBP/ROR2/FRZB/NPHP3/MEF2C/RBP4/HOXA11/NTN1/TSHZ1/SATB2/RBPMS2/SMAD3/IRX5/LRIG1/MAPK1/LRIG3/TGFBR2/WDPCP/BMP7/HOXB3/GATA2/OSR1/RPL38/TBX15/WDR19/EFEMP1/PDGFRA/SLITRK6/GLI2/HO…
GOBP	CHRONIC INFLAMMATORY RESPONSE	19	0.7329	2.10506	5e-05	0.000666376	0.000465474	4213	tags=74%, list=20%, signal=59%	S100A9/S100A8/AHCY/CXCL13/IDO1/VNN1/CCL5/TNF/PTGES/UNC13D/GJA1/IL10/FOXP3/VCAM1
GOBP	NUCLEOSIDE TRIPHOSPHATE BIOSYNTHETIC PROCESS	76	0.507816	1.92676	4.92e-05	0.000657298	0.000459133	3869	tags=47%, list=19%, signal=39%	ENO1/ATP5MF/UCK2/NME1/CTPS1/VCP/ATP5MC3/TYMS/CMPK2/ATP5PF/ATP5F1B/STOML2/ATP5MC1/DTYMK/IMPDH1/ATP5PB/ALDOA/SLC25A13/ATP5ME/AK1/ATP5MG/ATP5F1C/ADK/UQCC3/ATP5PO/ATP6V1A/ANTKMT/TREM2/PKM/ATP5F1D/PARP1/ATP5F1A/ATP5PD/VPS9D1/NME7/CAD
GOBP	REGULATION OF ACTOMYOSIN STRUCTURE ORGANIZATION	93	-0.438309	-1.8795	4.91e-05	0.000656576	0.000458629	4675	tags=55%, list=22%, signal=43%	CCDC88A/ARAP1/BAG4/NOX4/SFRP1/RHOA/MYLK3/PAK1/SMAD4/WNT11/PAK2/PHLDB2/S1PR1/FRMD7/ARHGEF10L/TACSTD2/NRP1/TAC1/ASAP3/PXN/ABL1/CCN2/WASF2/RGCC/CLASP1/S100A10/EDN1/ARHGEF15/RAPGEF3/MET/ALMS1/TESK1/SORBS3/PFN2/ARHGEF5/AKAP13/ROCK2/ARHGAP6/SMAD3/FERMT2/SDC4/MYOC/TSC1/LPAR1/LIMCH1/CORO2B/PIK3R1/DLC1/TPM1/CGNL1/ARHGEF10
GOBP	REGULATION OF NEURON PROJECTION DEVELOPMENT	414	-0.286383	-1.47006	4.82e-05	0.000646568	0.000451638	4656	tags=34%, list=22%, signal=27%	FBXO7/MAPT/SCN1B/DAB2IP/CUX2/ABL2/PAK2/INPP5F/SHTN1/LRP1/ALKAL2/SEMA3A/DVL1/ARHGAP44/CERS2/RND2/PTPN9/SF3A2/TRPC6/ULK4/FRMD7/OBSL1/FUT9/LRIG2/TNIK/RUFY3/SERPINF1/EFHC2/AMIGO1/PRRX1/LRRC4C/NCKIPSD/SERPINI1/SS18L1/CAMSAP2/FEZ1/UBE3A/SEMA6D/PTEN/NEDD4L/NRP1/SPOCK1/PLXND1/RAP1A/EFNB3/RELN/TIAM2/BAG5/CNTN1/MFSD2A/ANKRD27/ADCY6/NR2F1/ROBO2/SARM1/PRKD1/CXCL12/MYLIP/HECW2/FZD1/CAMK1D/RTN4R/LRRK2/RGS2/PDL…
GOBP	URETER DEVELOPMENT	18	-0.716913	-2.08217	4.69e-05	0.000630499	0.000440414	3069	tags=50%, list=15%, signal=43%	BMP4/SOX8/NPHP3/ALDH1A2/LZTS2/OSR1/NFIA/EMX2/GATA3
GOBP	REGULATION OF CELL MATRIX ADHESION	120	-0.401464	-1.76924	4.61e-05	0.000621191	0.000433912	4798	tags=46%, list=23%, signal=35%	NF1/CCL28/CDK6/DDR1/LRP1/TEK/PHLDB2/ACER2/KDR/DMTN/EFEMP2/PTEN/NRP1/VCL/ABL1/BCAS3/JAG1/FAM107A/EFNA5/SEMA3E/BST1/CLASP1/S100A10/MACF1/DUSP3/APOD/FMN1/RRAS/ACVRL1/GPM6B/PTK2/PIK3CB/GREM1/GSK3B/COL16A1/CAMSAP3/DAG1/IQGAP1/ROCK2/ARHGAP6/SMAD3/FERMT2/SDC4/WDPCP/NEXMIF/MYOC/BCL6/TSC1/LIMCH1/PIK3R1/PEAK1/DLC1/BCL2/POSTN/UTRN
GOBP	REGULATION OF LEUKOCYTE PROLIFERATION	229	0.374323	1.65212	4.6e-05	0.000620821	0.000433654	4807	tags=41%, list=23%, signal=32%	CD24/CD274/PNP/SLC7A1/MYD88/TNFRSF21/PRKCQ/PYCARD/GSTP1/IDO1/IRF1/PLA2G2F/ARG1/SASH3/CEBPB/JAK3/MIF/IL1B/LYN/CD6/CORO1A/IL12B/CDKN1A/CCL8/GLMN/SYK/IKZF3/RAC2/IL6/RIPK3/LGALS9/CCL19/PTPN22/IL23A/GPR183/IL2RA/TFRC/HLA-DMB/FADD/LILRB4/HLA-E/TNFRSF1B/TNFSF9/CD86/CRTAM/TMEM131L/SCRIB/BST2/SFTPD/CCL5/DNAJA3/EBI3/XCL1/CD3E/CLEC4G/ANXA1/PELI1/IL12RB1/CASP3/TYROBP/CCR2/CD38/TNFRSF13B/LILRB2/IL15/TNFRSF4/C…
GOBP	NUCLEAR EXPORT	192	0.396624	1.71799	4.55e-05	0.00061561	0.000430013	4158	tags=40%, list=20%, signal=32%	RAN/IFI27/EIF4A3/DDX39A/EIF4E/EIF6/HNRNPA2B1/NCBP1/SRSF9/NUP37/SFN/HSPA9/NUP210/CPSF6/NUP88/NUP62CL/IL1B/SIRT7/BAG3/CPSF3/ALYREF/CDK5/MAGOHB/ABCE1/NUP50/XPOT/NOL6/SARNP/NSUN2/SRSF2/NXT1/XPO6/CSE1L/RANGAP1/NPM1/POLR2D/RAE1/XPO5/SRSF7/SEC13/SRSF1/TXN/PARK7/THOC5/IWS1/NRDE2/NUP155/THOC6/THOC7/NDC1/SP100/CPSF4/GLE1/MAGOH/NUP188/DDX19A/RRS1/RIOK2/WDR33/NUP85/UHMK1/FYTTD1/CHTOP/NUP205/NUTF2/EIF5A/AGFG1…
GOBP	DNA PACKAGING	212	0.379802	1.66624	4.53e-05	0.00061302	0.000428204	4684	tags=38%, list=22%, signal=30%	CCNB1/RUVBL1/H2AX/NUSAP1/CDCA5/PSME4/NCAPH/NCAPG/CENPN/HDAC1/MACROH2A1/KNL1/CENPW/CENPX/MCM2/ASF1B/TOP2A/OIP5/HJURP/CENPM/DNMT1/CENPK/CENPA/NAA10/AIFM1/NCAPG2/IPO4/SMC2/POLE3/SMC4/CENPS/HAT1/RRP8/NASP/NOC2L/SRPK1/NPM1/GRWD1/CENPH/CENPI/NAP1L4/HMGB2/H2BC9/MACROH2A2/H3C10/HELLS/NRDE2/PAF1/NCAPD2/MBD2/CDKN2A/MIS18A/SIRT6/SMARCA5/HMGA1/RNF8/BEND3/SPTY2D1/DAXX/CENPL/CHAF1A/NAA60/CENPO/PARP10/CHMP1A/DN…
GOBP	POSITIVE REGULATION OF ALPHA BETA T CELL ACTIVATION	62	0.529015	1.94945	4.34e-05	0.000589679	0.0004119	4618	tags=61%, list=22%, signal=48%	NFKBIZ/PNP/IL4R/PRKCQ/CD83/SASH3/AP3D1/IFNG/SOCS1/CBFB/IL12B/HSPH1/SYK/LGALS9/CCL19/AP3B1/PTPN22/IL23A/LILRB4/HLA-E/CD86/EBI3/NFKBID/XCL1/CD3E/ANXA1/HLA-DRA/IL12RB1/CCR2/ZAP70/RASAL3/NLRP3/CD80/FOXP3/PTPRC/CD28/MALT1/NKAP
GOBP	REGULATION OF MRNA METABOLIC PROCESS	324	0.345448	1.57477	4.25e-05	0.000577469	0.000403372	3743	tags=31%, list=18%, signal=26%	ZC3H12A/PSME2/CCNB1/CARHSP1/PSMB2/PSMA5/PSMB5/PSMA3/C1QBP/MYD88/PSMD12/PSME4/PSMA2/PSME1/PSMB6/EXOSC4/PSMB10/PSMB3/PSMD6/PSMB8/PSMC4/PSMA4/HNRNPA2B1/PSMD2/NCBP1/SRSF9/HNRNPC/PNPT1/FASTKD2/CPSF6/PSMD11/PSMD1/FASTKD5/PSMD14/PSMC3/PSMB9/EXOSC3/FASTKD1/RIDA/PSMA7/DIS3/PSMD9/PSMD8/TBRG4/HSPA8/PDE12/PSMA1/EXOSC1/ZC3H12D/PSMD13/PSMF1/PSMC5/PSMC2/LEO1/CNOT1/PSMB1/ZFP36/PSMC6/SRPK1/POLR2G/PSME3/EXOSC2/PSM…
GOBP	REGULATION OF WNT SIGNALING PATHWAY PLANAR CELL POLARITY PATHWAY	15	-0.75525	-2.12623	4.23e-05	0.000577006	0.000403048	3115	tags=73%, list=15%, signal=62%	ABL1/DAB2/RSPO3/MLLT3/NKD1/DACT1/DKK1/ANKRD6/GPC3/NPHP3/ZNRF3
GOBP	POSITIVE REGULATION OF CYSTEINE TYPE ENDOPEPTIDASE ACTIVITY	146	0.419151	1.75822	4.2e-05	0.000573719	0.000400752	3579	tags=38%, list=17%, signal=32%	S100A9/CYCS/SOX7/S100A8/IFI16/CLEC7A/FAM162A/PYCARD/VCP/CASP1/BAK1/NDUFA13/CFLAR/TNFSF10/LCK/AIM2/AIFM1/BCAP31/HSPE1/MYC/XDH/BID/CASP10/PDCD5/SYK/PDCD6/ST20/LGALS9/CTSD/TNFRSF10A/BEX3/CASP8/TNFRSF10B/FADD/LAPTM5/BOK/NLRP2/HSPD1/TNF/DIABLO/CRADD/MAP3K5/CARD9/PML/FASLG/BAX/HTRA2/TNFSF15/TRADD/HIP1R/ARRB1/CIDEB/BCL10/NLRC4/PDCD2/LGMN
GOBP	REGULATION OF SMALL GTPASE MEDIATED SIGNAL TRANSDUCTION	315	-0.311731	-1.55751	4.06e-05	0.000556047	0.000388408	3710	tags=31%, list=18%, signal=26%	SQSTM1/LPAR4/ALS2/SOS1/ARHGEF2/MADD/RDX/NRP1/PPP2CB/IQSEC1/RELN/TIAM2/GNA13/RABL3/SRGAP3/ABL1/SOS2/DENND3/RASA4/PDGFRB/KITLG/SHOC2/ARHGEF1/ARHGAP24/RTN4R/ARHGAP10/RASA3/CYTH3/NET1/ERBIN/AMOT/NGEF/SYDE1/SLIT2/F2R/FBXO8/AUTS2/RHOBTB1/RHOQ/MET/ARHGAP20/A2M/ARHGEF6/TRIO/ARHGAP26/RALGAPB/RHOT1/ARHGAP12/APOE/OGT/ARHGAP35/ITPKB/PIK3CB/ARHGAP42/PLEKHG5/RHOB/STMN3/ARHGEF5/SCAI/RHOJ/STARD13/AKAP13/ARHGAP6/…
GOBP	REGULATION OF KILLING OF CELLS OF OTHER ORGANISM	16	0.765291	2.11917	4.06e-05	0.000556047	0.000388408	2196	tags=62%, list=11%, signal=56%	KRT6A/CLEC7A/ARG1/PRF1/IFNG/NOS2/SERPINB9/SYK/CXCL6/CASP8
GOBP	RNA 3 END PROCESSING	137	0.432415	1.79408	4e-05	0.000549803	0.000384046	3669	tags=39%, list=18%, signal=32%	CCNB1/EIF4A3/DDX39A/EXOSC4/NCBP1/SRSF9/PNPT1/CPSF6/EXOSC3/HSD17B10/CPSF3/ALYREF/TRMT10C/MAGOHB/CSTF2/ELAC2/POLR3K/TUT7/SARNP/LEO1/SRSF2/EXOSC2/POLR2D/ERI1/SRSF7/SRSF1/GRSF1/ERI2/USB1/INTS7/DKC1/EXOSC5/THOC5/TRNT1/CLP1/PAF1/THOC6/INTS5/THOC7/SNRPA/NELFE/CPSF4/SSU72/CSTF1/MAGOH/CDK9/WDR33/CTR9/INTS14/CHTOP/EXOSC8/TOE1/CSTF3
GOBP	POSITIVE REGULATION OF KILLING OF CELLS OF OTHER ORGANISM	10	0.844395	2.03914	4e-05	0.000549803	0.000384046	1638	tags=60%, list=8%, signal=55%	CLEC7A/ARG1/PRF1/IFNG/NOS2/SYK
GOBP	CRISTAE FORMATION	34	0.619415	2.03342	3.91e-05	0.000539461	0.000376822	5190	tags=71%, list=25%, signal=53%	ATP5MF/ATP5MC3/ATP5PF/ATP5F1B/ATP5MC1/ATP5PB/ATP5ME/MICOS13/CHCHD3/ATP5MG/ATP5F1C/IMMT/UQCC3/ATP5PO/ATP5F1D/ATP5F1A/APOO/ATP5PD/DNAJC11/SAMM50/CHCHD10/ATP5F1E/AFG3L2/ADCK1
GOBP	CELL CELL ADHESION VIA PLASMA MEMBRANE ADHESION MOLECULES	251	-0.32963	-1.59652	3.9e-05	0.000539434	0.000376803	5105	tags=37%, list=24%, signal=28%	PCDH8/AMIGO2/PCDHGA10/PCDHB6/CDH5/PCDHGA3/FAT4/MBP/DSC1/ITGAM/TRO/FGFRL1/PCDHB12/PTPN23/PCDHB13/SCARF2/CLDN15/OBSL1/PCDH12/TGFB2/MPZ/BMP2/CDHR3/AMIGO1/LRRC4C/PCDHB11/CADM1/MAP2K5/ROBO3/NECTIN3/SLITRK2/DSG1/IGSF11/ITGA5/ROBO2/TENM1/CBLN1/CLDN3/FAT3/CD164/CLDN11/PCDH9/CDH10/PCDHB7/PCDHB14/PECAM1/NPTN/PTPRM/L1CAM/WNK1/ADIPOQ/CLSTN1/MYOT/PCDHB2/PCDHB10/PCDH19/NLGN1/PCDH18/PCDHB4/NEXN/PCDHB5/ROBO4/CLD…
GOBP	NUCLEOSIDE METABOLIC PROCESS	100	0.470103	1.87121	3.88e-05	0.000536961	0.000375076	3901	tags=37%, list=19%, signal=30%	TYMP/RAN/UPP1/TK1/PNP/UCK2/NME1/NT5C3A/AHCY/MFN1/ENTPD7/ACP3/APOBEC3B/DTYMK/TJP2/APRT/ATIC/IMPDH1/NT5C2/HPRT1/PUDP/XDH/DNPH1/ADK/UMPS/GNAI3/GMPS/ADA2/AMD1/CASK/PRPSAP2/DERA/CARD11/NME7/CAD/GMPR2/PRPS2
GOMF	HEPARIN BINDING	157	-0.368109	-1.69114	3.83e-05	0.000531521	0.000371276	3940	tags=37%, list=19%, signal=30%	LIPC/LTBP2/MSTN/EFEMP2/FSTL1/NRP1/ADAMTS5/LGR6/APLP2/FGF1/APP/BMP4/CCN2/SMOC2/TENM1/CTSG/THBS2/RSPO3/THBS3/RTN4R/VEGFB/FGFBP3/SLIT2/CCN3/LXN/PGF/SOD3/FBLN7/FGF9/PCOLCE2/SERPINA5/SLIT3/APOE/PTPRS/FGFR2/LPL/TNXB/FN1/FGFR1/PTPRF/PTN/ECM2/PRELP/CCN5/RPL22/CFH/RSPO1/NDNF/LAMC2/BMP7/PTCH1/PAFAH1B1/RTN4RL1/GPNMB/POSTN/GREM2/TGFBR3/ANG
GOBP	REGULATION OF OSTEOBLAST DIFFERENTIATION	114	-0.402841	-1.76854	3.83e-05	0.000531521	0.000371276	5583	tags=50%, list=27%, signal=37%	HDAC7/SFRP1/ACVR2A/NELL1/SFRP2/GDF10/IGF1/BAMBI/CTHRC1/TWIST2/CDK6/HDAC4/TOB1/TMEM119/CRIM1/CCN4/LRP5/ACVR2B/BMP2/BMP6/ATRAID/TNN/VEGFC/BMP4/RORB/WNT7B/GNAS/PRKD1/JAG1/DDR2/WWTR1/YAP1/LRP3/NOG/IL6ST/TWIST1/JUND/PPARG/PTK2/FGFR2/GREM1/BMPR1A/MEF2C/IGFBP5/SKI/SMAD5/BMPR1B/SMAD3/FERMT2/ZHX3/BMP7/PTCH1/GDPD2/CTNNBIP1/NBR1/GLI3/AXIN2
GOCC	MCM COMPLEX	11	0.828849	2.05692	3.8e-05	0.000529723	0.00037002	1698	tags=64%, list=8%, signal=58%	MCM6/MCM4/MCM5/MCM2/MCM7/MCM3/MCMBP
GOBP	REGULATION OF APOPTOTIC SIGNALING PATHWAY	328	0.349177	1.59088	3.78e-05	0.000528255	0.000368994	4189	tags=34%, list=20%, signal=27%	S100A9/ENO1/S100A8/PPIF/SLC25A5/CTSC/PRELID1/GHITM/PYCARD/HDAC1/IFI6/GSTP1/HIF1A/NDUFA13/IL19/MMP9/CFLAR/VNN1/TNFSF10/PPIA/PTPN2/LCK/DDIAS/NDUFS3/VDAC2/BCAP31/TRAP1/PPP1CA/MIF/IL1B/P4HB/FIGNL1/BID/FAIM/HMOX1/BCL2L12/GPX1/SOD2/CSNK2A1/PIH1D1/HYOU1/TRAF1/RIPK3/DEDD2/GCLM/GNAI3/CAAP1/WWOX/TNFRSF12A/ARMC10/TNFRSF10A/NOC2L/SLC9A3R1/PLAUR/TRAF7/PSME3/CASP8/PPP2R1B/TNFRSF10B/FADD/SIAH2/BDKRB2/TPD52L1/LT…
GOBP	NEGATIVE REGULATION OF TRANSMEMBRANE RECEPTOR PROTEIN SERINE THREONINE KINASE SIGNALING PATHWAY	122	-0.401823	-1.77411	3.73e-05	0.000521389	0.000364199	5601	tags=48%, list=27%, signal=35%	SMAD2/CIDEA/SFRP1/SFRP2/FBN1/NRROS/STUB1/BAMBI/LEMD3/RASL11B/PEG10/PDPK1/HTRA1/UBC/TOB1/DACT2/CRIM1/SMURF1/SORL1/LDLRAD4/SLC2A10/FSTL3/HTRA4/SIRT1/ABL1/SPRED2/GLG1/NOG/CCN3/CD109/SPRED1/SPART/DKK1/TRIM33/PPARG/NBL1/SNX25/GREM1/SMURF2/PMEPA1/PPARA/CHRDL1/SKI/RBPMS2/SMAD3/TGFB1I1/CILP/TGFBR2/ASPN/MAGI2/IL17RD/SPRY1/FST/SPRY2/CAV2/CAV1/GREM2/TGFBR3
GOBP	RESPONSE TO BMP	157	-0.368541	-1.69313	3.69e-05	0.0005173	0.000361342	5056	tags=38%, list=24%, signal=29%	SMAD4/CDH5/BAMBI/GDF9/LEMD3/HTRA1/USP9X/MSX1/TOB1/TMEM100/CRIM1/TGFB2/SMURF1/SORL1/ACVR2B/BMP2/BMP6/FSTL1/SFRP5/FSTL3/ABL1/BMP4/HES1/NOG/SPART/TRIM33/PPARG/NBL1/ACVRL1/HIVEP1/GREM1/SMURF2/NUMA1/TNMD/BMPR1A/GDF7/ROR2/GPC3/NEO1/SMAD9/CHRDL1/SKI/RBPMS2/SMAD5/BMPR1B/SMAD3/RBPJ/BMP7/FOXD1/TFAP2B/ELAPOR2/RGMB/PDCD4/RGMA/ZNF423/FST/NOTCH2/GREM2/TGFBR3/GATA3
GOBP	REGULATION OF CARTILAGE DEVELOPMENT	61	-0.499115	-1.95101	3.58e-05	0.000503807	0.000351917	4102	tags=52%, list=20%, signal=42%	TRPS1/PKDCC/WNT11/CCN4/KAT2A/RFLNB/BMP2/BMP6/TAPT1/BMP4/CCN2/GLG1/SHOX2/LEP/CHADL/NOG/LNPK/ACVRL1/GREM1/FRZB/HOXA11/SCIN/BMPR1B/MAF/SMAD3/EFEMP1/ZBTB16/GLI2/GLI3/SOX6/AXIN2/SOX5
GOBP	SENSORY ORGAN MORPHOGENESIS	237	-0.33519	-1.60996	3.58e-05	0.000503807	0.000351917	3430	tags=28%, list=16%, signal=24%	NECTIN3/MAFB/IFT172/COL8A1/MFAP2/MFSD2A/ATP6V1B1/BMP4/RORB/TFAP2A/JAG1/AHI1/PTPRM/DIO3/EDN1/NKD1/NOG/DVL2/SOX8/FZD3/TSKU/SP3/TWIST1/MFAP5/LRP6/FGFR2/SEC24B/NTRK2/COL8A2/SOBP/ROR2/PTN/FRZB/RBP4/NTN1/TSHZ1/ZHX2/SKI/WNT2/ABI2/LRIG1/MAPK1/IFT122/LRIG3/WDPCP/BMP7/TFAP2B/GATA2/OSR1/RPL38/WDR19/EFEMP1/CYP26B1/CDON/SLITRK6/GLI2/NOTCH2/GLI3/SPRY2/C12orf57/BCL2/OSR2/MEIS1/SOD1/BCAR3/WNT2B/GATA3
GOMF	CHEMOKINE ACTIVITY	42	0.602725	2.05734	3.56e-05	0.000502506	0.000351008	3002	tags=50%, list=14%, signal=43%	C10orf99/CCL20/CXCL1/CXCL13/CXCL2/CXCL16/CXCL10/CXCL8/CCL18/CCL4/CCL22/CXCL9/CCL2/CCL8/CCL7/CCL19/CXCL3/CXCL6/CXCL11/CCL5/XCL1
GOBP	ESTABLISHMENT OF RNA LOCALIZATION	188	0.385867	1.66519	3.55e-05	0.000502326	0.000350883	4158	tags=40%, list=20%, signal=33%	RAN/EIF4A3/DDX39A/EIF4E/EIF6/HNRNPA2B1/NCBP1/SRSF9/NUP37/PNPT1/NUP210/CPSF6/NUP88/NUP62CL/MX2/CPSF3/ALYREF/CKAP5/MAGOHB/ABCE1/NUP50/XPOT/NOL6/SARNP/NSUN2/SRSF2/NXT1/ZFP36/TST/CETN2/NPM1/POLR2D/MRPL18/RAE1/NCBP3/MVP/XPO5/SRSF7/SEC13/SRSF1/THOC5/IWS1/NRDE2/NUP155/IGF2BP3/THOC6/THOC7/NDC1/YBX1/CPSF4/GLE1/MAGOH/NUP188/DDX19A/RRS1/RIOK2/WDR33/NUP85/FYTTD1/ARC/CHTOP/NUP205/NUTF2/EIF5A/AGFG1/UPF1/ENY2/N…
GOBP	DNA REPLICATION INDEPENDENT NUCLEOSOME ORGANIZATION	48	0.571391	2.01921	3.49e-05	0.000494455	0.000345385	5572	tags=62%, list=27%, signal=46%	RUVBL1/CENPN/KNL1/CENPW/CENPX/ASF1B/OIP5/HJURP/CENPM/CENPK/CENPA/IPO4/CENPS/HAT1/NASP/NPM1/CENPH/CENPI/MIS18A/SMARCA5/CENPL/CENPO/CENPU/H4C4/H4C9/RBBP4/H4C2/CENPQ/HIRA/H4C5
GOBP	SUBSTRATE ADHESION DEPENDENT CELL SPREADING	108	-0.42349	-1.84891	3.43e-05	0.000487846	0.000340768	3757	tags=42%, list=18%, signal=34%	ILK/TRIOBP/DMTN/ITGAV/TACSTD2/NRP1/PXN/ABL1/PARVB/MERTK/BVES/NTN4/EFNA5/S100A10/ANTXR1/DOCK5/EFNA1/NEDD9/PARVA/FER/FZD7/TESK1/PTK2/ITGA8/LAMB2/FN1/LIMS2/LAMC3/FBLN1/DOCK1/FERMT2/LAMC1/MYOC/FZD4/LAMA5/MEGF9/MYADM/PIK3R1/AXL/PEAK1/ARHGEF7/LAMB4/POSTN/SRGAP2/KANK1
GOBP	GLYCOSYL COMPOUND BIOSYNTHETIC PROCESS	39	0.596483	2.0008	3.41e-05	0.00048527	0.000338969	3869	tags=49%, list=19%, signal=40%	TYMP/UPP1/TK1/UCK2/NME1/DTYMK/APRT/IMPDH1/HPRT1/PUDP/ADK/UMPS/TYW5/GMPS/ADA2/AMD1/LCMT2/NME7/CAD
GOBP	REGULATION OF ALPHA BETA T CELL ACTIVATION	93	0.481664	1.89195	3.35e-05	0.000478082	0.000333948	4624	tags=52%, list=22%, signal=40%	ZC3H12A/CD274/NFKBIZ/PNP/IL4R/PRKCQ/CD83/IRF1/PRDM1/SASH3/AP3D1/JAK3/IFNG/SOCS1/CBFB/IL12B/HSPH1/SYK/LGALS9/CCL19/AP3B1/PTPN22/IL23A/LILRB4/HLA-E/CD86/CRTAM/EBI3/NFKBID/XCL1/CD3E/ANXA1/HLA-DRA/IL12RB1/CCR2/ZAP70/LILRB1/RASAL3/NLRP3/CD300A/CD80/FOXP3/ZNF683/PTPRC/CD28/MALT1/NKAP/AGER
GOMF	UNFOLDED PROTEIN BINDING	109	0.454002	1.83686	3.35e-05	0.000478082	0.000333948	3530	tags=42%, list=17%, signal=35%	DNAJB6/CCT5/RUVBL2/GRPEL1/CLPX/DNAJA2/HSPA5/CCT2/MKKS/PPIA/CCT3/DNAJB11/HEATR3/HSPA14/HSPA9/TTC1/CCT7/TRAP1/HSPE1/HSPA8/HYOU1/TOR1A/DNAJB1/PET100/NPM1/VBP1/NUDCD2/TCP1/NAP1L4/TAPBP/NDUFAF1/SHQ1/PFDN4/HSPD1/GRPEL2/CCT6A/PDRG1/CANX/DNAJA3/CDC37/CCT8/HTRA2/PPIB/LMAN1/PTGES3/CHAF1A
GOCC	AZUROPHIL GRANULE LUMEN	84	0.482728	1.86479	3.26e-05	0.000466634	0.000325952	4254	tags=49%, list=20%, signal=39%	SERPINB3/GM2A/FABP5/CTSC/S100A7/PYCARD/GGH/VCP/PRSS2/CCT2/IMPDH1/PLAC8/ARG1/PSMD1/TOLLIP/SERPINA3/NAPRT/LYZ/PA2G4/PTGES2/GRN/CTSA/CPPED1/GLA/ADA2/ARSA/ARHGAP45/STK11IP/CCT8/PRDX6/PRKCD/FRK/MNDA/UNC13D/TRAPPC1/CAP1/AGA/MAN2B1/TUBB4B/CREG1/GALNS
GOBP	NUCLEOSIDE SALVAGE	16	0.769737	2.13148	3.23e-05	0.000464065	0.000324157	1633	tags=50%, list=8%, signal=46%	TYMP/UPP1/TK1/UCK2/APRT/HPRT1/PUDP/ADK
GOBP	BRANCHING MORPHOGENESIS OF AN EPITHELIAL TUBE	141	-0.387892	-1.75828	3.17e-05	0.000455899	0.000318453	5056	tags=44%, list=24%, signal=34%	SMAD4/HOXB7/FOXA1/FAT4/WNT6/DDR1/CTSH/MED1/LRP5L/KDR/CTNNB1/LRP5/BMP2/TACSTD2/BTRC/FOXC2/NRP1/LGR4/PLXND1/FGF1/CLIC4/DLG1/ABL1/BMP4/AGT/TBX3/SEMA3E/YAP1/EDN1/SLIT2/NOG/SOX8/MET/ESR1/EGF/PGR/LRP6/FGFR2/GREM1/PBX1/GDF7/PKD2/GPC3/HOXA11/DAG1/WNT2/TGFBR2/BMP7/FOXD1/DLG5/PTCH1/DCHS1/PKD1/LAMA5/SPRY1/CTNNBIP1/GLI2/AR/GLI3/SPRY2/BCL2/WNT2B
GOBP	REGULATION OF MUSCLE SYSTEM PROCESS	217	-0.348624	-1.66036	3.15e-05	0.000454197	0.000317264	3204	tags=29%, list=15%, signal=25%	CALM2/PDE9A/FOXO1/DLG1/JARID2/CCN2/AGT/RGS2/MYL9/ATP2B1/EDN1/IL6ST/F2R/PRKCA/DOCK5/PPP1R12B/DOCK4/TACR1/FGF13/FOXO3/TNNC2/DSG2/SGCA/ANK2/DSP/BIN1/CAMK2G/ARHGAP42/KLF4/PPARA/FBXO32/PPARGC1A/SLC8A1/IGFBP5/P2RX1/ORMDL3/MYOCD/KCNMA1/DAG1/LMCD1/ROCK2/ADRA1A/PRKG1/SMAD3/ATP2B4/TNNT1/PLN/AKAP9/TNNC1/ATP1A2/ADRA2A/TNNI2/CASQ2/CNN1/DMD/TPM1/C12orf57/KIT/CAV1/SOD1/MEF2A/ADRB2/UTRN
GOBP	CHROMATIN REMODELING AT CENTROMERE	41	0.602229	2.04995	3.01e-05	0.000434279	0.000303351	5247	tags=63%, list=25%, signal=48%	RUVBL1/CENPN/KNL1/CENPW/CENPX/OIP5/HJURP/CENPM/CENPK/CENPA/CENPS/NASP/NPM1/CENPH/CENPI/HELLS/MIS18A/SMARCA5/CENPL/CENPO/CENPU/H4C4/H4C9/RBBP4/H4C2/CENPQ
GOBP	BONE MORPHOGENESIS	87	-0.448269	-1.89784	2.99e-05	0.000432324	0.000301985	4466	tags=44%, list=21%, signal=34%	MSX1/TEK/TMEM119/LRP5L/FREM1/INSIG1/LRP5/BMP6/INPPL1/BPNT2/FGFR3/BMP4/GNAS/MMP16/TFAP2A/GLG1/RAB23/THBS3/DHRS3/SHOX2/TSKU/TWIST1/LRP6/FOXC1/FGFR2/SP5/MEF2C/HOXA11/MEF2D/SKI/BMPR1B/TGFBR2/CYP26B1/NAB1/GLI3/OSR2/FOXN3/AXIN2
GOBP	CYTOKINE PRODUCTION INVOLVED IN IMMUNE RESPONSE	90	0.478168	1.86512	2.89e-05	0.0004199	0.000293307	4098	tags=44%, list=20%, signal=36%	WNT5A/NOD2/FZD5/CLEC7A/RSAD2/SLC7A5/ARG1/SASH3/JAK3/IL1B/SEMA7A/ATG5/HMOX1/NR4A3/IL6/CD36/FFAR2/LILRB4/LAPTM5/HLA-E/TNFRSF1B/BST2/TNF/DDX21/XCL1/DDX58/IRAK3/CD96/BCL10/DENND1B/CCR2/B2M/HLA-F/LILRB1/NLRP3/HLA-G/IL10/FOXP3/TRAF2/TRIL
GOBP	SMALL MOLECULE CATABOLIC PROCESS	413	0.332193	1.54201	2.81e-05	0.000408009	0.000285001	4360	tags=32%, list=21%, signal=26%	KYNU/AKR1B10/TYMP/ENO1/TPI1/PGAM1/UPP1/PGK1/PNP/PGM2/GOT2/ALDH7A1/PPARD/HK2/GOT1/TIGAR/NT5C3A/AHCY/GALE/GK/BDH1/NUDT15/ENTPD7/PGD/FUT2/GPT2/APOBEC3B/IDO1/AASS/IL4I1/SRD5A3/SHMT2/SLC27A4/HPRT1/CBR3/ALDOA/ACOX3/FOXK2/ARG1/HAL/CYP27B1/ADH7/FUT1/GAPDH/HSD17B10/NOS2/OXCT1/RIDA/CROT/ALDH4A1/ALDH2/IMPA2/TDO2/NUDT5/XDH/GPI/MTRR/CYP24A1/SLC25A44/INPP1/ALDH3B2/GALK1/ETFA/GLUL/SESN2/HSD17B4/PCK2/BCKDK/MTMR2…
GOMF	MHC PROTEIN BINDING	30	0.661437	2.08686	2.77e-05	0.000403217	0.000281654	4376	tags=67%, list=21%, signal=53%	CLEC7A/VCP/ATP5F1B/TAP1/CYRIB/TAP2/BCAP31/LAG3/PILRA/HLA-E/TAPBP/CD8A/KLRD1/ATP5F1A/LILRB2/CD244/LILRB1/MARCHF1/TUBB4B/KIR2DS4
GOMF	DNA REPLICATION ORIGIN BINDING	23	0.70023	2.07831	2.74e-05	0.000399749	0.000279231	3338	tags=61%, list=16%, signal=51%	MCM6/MCM10/CDC6/MCM4/CDC45/MCM5/MCM2/MCM7/ORC1/MCM3/GRWD1/HSPD1/ORC5/MCM9
GOMF	UBIQUITIN LIKE PROTEIN CONJUGATING ENZYME ACTIVITY	38	0.605031	2.02654	2.73e-05	0.000399229	0.000278868	4118	tags=55%, list=20%, signal=44%	UBE2F/UBE2C/UBE2L6/UBE2N/UBE2T/UBE2L3/UBE2NL/UBE2D3/UBE2S/UBE2D1/UBE2A/UBE2G1/UBE2D2/UBE2J2/UBE2E1/UBE2I/UBE2W/UBE2E2/CDC34/UBE2Z/UBE2J1
GOBP	MONONUCLEAR CELL DIFFERENTIATION	399	0.329327	1.52468	2.71e-05	0.000398051	0.000278045	4929	tags=38%, list=24%, signal=30%	ZC3H12A/NFKBIZ/IRF7/PNP/GPR68/IFI16/BLNK/FZD5/PRELID1/IL4R/CCR7/HMGB3/CD83/ENTPD7/BAK1/EZH2/VNN1/RSAD2/PTPN2/LCK/BCL3/IRF1/ADAM17/PRDM1/STAT3/TUSC2/CTSL/PLCG2/CD2/SASH3/CEBPB/IRF8/LY6D/RHOH/AP3D1/JAK3/IFNG/RELB/IL1B/BATF2/CD3D/MYC/ATG5/LYN/SOCS1/CBFB/SLAMF8/IL12B/XRCC6/FANCD2/BATF3/ZC3H8/SYK/IKZF3/IL7R/IL6/ITGA4/RIPK3/LGALS9/CCL19/CD27/AP3B1/PTPN22/IL23A/BATF/GPR183/LAG3/CD3G/PRKDC/IL2RA/PGLYRP2/…
GOCC	I BAND	130	-0.40045	-1.79222	2.69e-05	0.000395182	0.000276041	2721	tags=31%, list=13%, signal=27%	KRT19/PARVB/RYR3/PDLIM5/MYL9/MYOT/PPP1R12B/NEXN/ACTC1/PARVA/JPH2/SYNE2/PPP3CB/ANK2/BIN1/DST/SYNC/SORBS2/FBXO32/SLC8A1/PPP1R12A/PDLIM3/ADRA1A/FERMT2/FHOD3/ATP2B4/CFL2/SCN3B/FLNC/CSRP1/DES/CASQ2/NEBL/DMD/FLNB/SYNPO2/PDLIM4/PGM5/CRYAB/AHNAK2
GOCC	T CELL RECEPTOR COMPLEX	49	0.574073	2.04264	2.6e-05	0.000383309	0.000267747	5489	tags=59%, list=26%, signal=44%	STOML2/CD3D/CD6/CD247/SYK/TRAC/CD3G/TRAV9-2/CD8A/TRAV13-1/TRBV7-3/TRAV12-1/CD3E/TRAV12-3/ZAP70/TRAV21/TRGV5/TRAV26-2/TRDV3/TRDC/TRAV23DV6/TRAV39/TRAT1/TRAV8-1/TRAV20/TRBV24-1/TRAV8-6/TRAV13-2/TRAV25
GOBP	PHOSPHATIDYLINOSITOL 3 KINASE SIGNALING	148	-0.383675	-1.74389	2.59e-05	0.000382444	0.000267144	4850	tags=44%, list=23%, signal=34%	HTR2A/NF1/PIP5K1C/INPP5E/PDGFB/DAB2IP/PTPN13/TEK/KDR/TGFB2/PIP4K2A/PREX2/ANGPT1/GPER1/PIK3CA/UBE3A/PTEN/PIP5K1B/ERBB3/IL18/ERBB4/SIRT1/PDGFRB/AGT/PEAR1/INSR/LEP/EDN1/F2R/IGF1R/ROR1/TWIST1/PDGFA/EGF/EGFR/PTK2/NTF3/PIK3CB/PIK3IP1/NTRK2/ZFP36L1/FN1/KLF4/FGFR1/PDGFD/ROR2/DIPK2A/MAPK1/PIP4K2B/MYOC/DCN/FYN/PLEKHA1/PPP2R5C/IRS1/PIK3C2G/PIK3R1/PDGFRA/KIT/IRS2/CAT/SERPINA12/NOP53/PDGFC/GATA3
GOBP	CENTROMERE COMPLEX ASSEMBLY	50	0.567989	2.02768	2.52e-05	0.000372844	0.000260437	3976	tags=52%, list=19%, signal=42%	DLGAP5/RUVBL1/CENPN/KNL1/CENPW/CENPF/CENPX/CENPE/OIP5/HJURP/CENPM/CENPK/CENPA/CENPS/NASP/NPM1/CENPH/CENPI/HELLS/MIS18A/RB1/SMARCA5/MIS12/CENPL/CENPO/CENPU
GOBP	GLOMERULUS DEVELOPMENT	61	-0.505688	-1.97671	2.45e-05	0.000363124	0.000253648	3778	tags=48%, list=18%, signal=39%	ANGPT1/FOXC2/LGR4/BMP4/HES1/PDGFRB/JAG1/ASXL1/WWTR1/PECAM1/NOG/ADIPOQ/FOXC1/MTSS1/PODXL/LAMB2/PDGFD/MEF2C/IQGAP1/PTPRO/CD34/ACTA2/BMP7/OSR1/KLF15/MAGI2/PDGFRA/NOTCH2/BCL2
GOBP	MITOTIC CELL CYCLE CHECKPOINT	154	0.414379	1.75525	2.39e-05	0.000355524	0.000248339	3658	tags=38%, list=18%, signal=31%	CCNB1/CDC20/CDK1/TFDP1/NDC80/BUB1B/AURKB/NABP1/PCNA/MAD2L1/ZWINT/AURKA/TTK/BUB1/CDC6/HUS1/TRIP13/ZWILCH/PLK2/CENPF/SFN/E2F8/CDT1/CHFR/ZNF207/DONSON/CNOT11/CDKN1A/ORC1/PLK1/FANCD2/GEN1/PLK3/BLM/MAD2L2/CNOT1/MAD2L1BP/PRKDC/CHEK2/LCMT1/CLSPN/TRIAP1/BRCA1/CDK2/CRADD/CDC25C/PML/BAX/GADD45A/PRMT1/MDM2/EME1/RFWD3/CNOT6/PRCC/SPDL1/KNTC1/NABP2
GOBP	STRESS FIBER ASSEMBLY	100	-0.435571	-1.88187	2.39e-05	0.000355524	0.000248339	4675	tags=45%, list=22%, signal=35%	WNT11/PAK2/PHLDB2/S1PR1/FRMD7/PHACTR1/ARHGEF10L/FAM171A1/ELN/TACSTD2/NRP1/TAC1/ASAP3/PXN/ABL1/CCN2/WASF2/RGCC/CLASP1/S100A10/ARHGEF15/RAPGEF3/MET/ALMS1/TESK1/SORBS3/PFN2/ARHGEF5/ROCK2/ARHGAP6/SMAD3/FERMT2/SDC4/MYOC/TSC1/LPAR1/LIMCH1/CORO2B/PIK3R1/ITGB5/DLC1/TPM1/CGNL1/SORBS1/ARHGEF10
GOBP	CELLULAR METABOLIC COMPOUND SALVAGE	34	0.628166	2.06215	2.38e-05	0.000355524	0.000248339	1645	tags=35%, list=8%, signal=33%	TYMP/UPP1/TK1/PNP/UCK2/APRT/HPRT1/PUDP/AMPD3/ADI1/ADK/NAPRT
GOCC	SITE OF DOUBLE STRAND BREAK	68	0.525282	1.9574	2.38e-05	0.000355524	0.000248339	4190	tags=47%, list=20%, signal=38%	H2AX/TIMELESS/NABP1/VCP/ARPC1A/HUS1/RPA3/RAD51/ARPC3/ACTR3/SIRT7/CGAS/ARPC2/MAD2L2/PAXX/RNF168/ESCO2/RAD18/ARPC5/XRCC4/SMC6/RNF138/PARP1/RNF8/RFWD3/SAMHD1/WAS/NABP2/RAD50/PARP3/SLF1/WRAP53
GOBP	EMBRYONIC SKELETAL SYSTEM MORPHOGENESIS	88	-0.457101	-1.94937	2.38e-05	0.000355524	0.000248339	3238	tags=38%, list=16%, signal=32%	SETD2/HOXD9/DLG1/BMP4/GNAS/MMP16/TFAP2A/HOXB5/SHOX2/DYNC2I1/NOG/HOXB6/HOXC4/HOXB2/TWIST1/PCGF2/TULP3/HOXD4/FGFR2/HOXA11/SATB2/SMAD3/IRX5/TGFBR2/BMP7/HOXB3/OSR1/TBX15/WDR19/PDGFRA/HOXC9/GLI3/OSR2
GOBP	BIOLOGICAL PROCESS INVOLVED IN INTERACTION WITH HOST	208	0.391497	1.70884	2.35e-05	0.000352442	0.000246186	4109	tags=39%, list=20%, signal=32%	SERPINB3/KRT6A/TRIM14/KPNA2/EPHA2/CDK1/CXCR4/TMPRSS4/LDLR/PLSCR1/TYMS/DYNLT1/PHB/TRIM22/PPIA/CXCL8/VAPA/CTSL/TRIM15/IFIT1/ACE2/IFITM1/ATG5/P4HB/TRIM62/TRIM21/ALYREF/FCN1/TRIM10/SERPINB9/IFITM3/LGALS9/CCR5/SLC52A2/ATG7/SMPD1/XPR1/SELPLG/ITCH/NPC1/PGLYRP2/TFRC/VAMP8/CASP8/TRIM5/SLAMF1/TNIP1/SIVA1/KPNB1/TCP1/HIPK2/CD86/THOC5/SCRIB/THOC6/IDE/VPS37B/EXOC2/PML/THOC7/PGLYRP3/SNX3/CLEC4G/CPSF4/ICAM1/CIIT…
GOBP	PROXIMAL DISTAL PATTERN FORMATION	31	-0.63875	-2.1738	2.29e-05	0.000344956	0.000240957	3223	tags=52%, list=15%, signal=44%	HOXD9/IRX2/EN1/GREM1/PBX1/HOXC10/HOXA11/ALDH1A2/OSR1/HOXA10/IRX1/CYP26B1/GLI2/LRP4/HOXC9/GLI3
GOBP	ROOF OF MOUTH DEVELOPMENT	83	-0.462799	-1.92761	2.26e-05	0.00034073	0.000238005	5056	tags=52%, list=24%, signal=39%	SMAD4/EPHB3/TBX1/LOXL3/PKDCC/WNT11/NPRL3/MSX1/TBC1D32/LRRC32/INSIG1/TIPARP/BBS7/ITGB8/TGFB2/PRRX1/SOS1/GABRB3/IFT172/FRAS1/DLG1/TFAP2A/TBX3/DHRS3/JAG2/TWIST1/IRF6/CLDN5/LRP6/BMPR1A/TSHZ1/SATB2/SKI/MEOX2/TGFBR2/WDPCP/OSR1/ANP32B/PLEKHA1/PDGFRA/GLI3/OSR2/TGFBR3
GOBP	CORNIFICATION	97	0.475581	1.88311	2.22e-05	0.000336438	0.000235008	2538	tags=29%, list=12%, signal=25%	KRT16/DSC2/PI3/KRT6A/KLK13/DSG3/LCE3D/TGM1/SPRR1B/SPRR3/KRT6B/CERS3/SPRR1A/IVL/KRT17/TMEM79/ST14/CSTA/SPRR2G/CAPN1/PRSS8/KLK12/PCSK6/KRT24/KRT78/PKP3/KRT37/FURIN
GOBP	GLYCOSYL COMPOUND METABOLIC PROCESS	122	0.445764	1.83989	2.11e-05	0.000320678	0.000223999	3901	tags=35%, list=19%, signal=29%	AKR1B10/TYMP/RAN/UPP1/TK1/PNP/UCK2/NME1/NT5C3A/AHCY/MFN1/ENTPD7/ACP3/APOBEC3B/DTYMK/TJP2/APRT/ATIC/IMPDH1/NT5C2/HPRT1/PUDP/GBA2/XDH/DNPH1/NAGA/ADK/UMPS/TYW5/GNAI3/GMPS/GLA/ADA2/AMD1/CASK/PRPSAP2/LCMT2/DERA/CARD11/NME7/CAD/GMPR2/PRPS2
GOMF	RIBONUCLEASE ACTIVITY	104	0.467157	1.87303	2.06e-05	0.000313456	0.000218954	4366	tags=46%, list=21%, signal=37%	ZC3H12A/ISG20/EXOSC4/RNASEH2A/FEN1/PNPT1/HELZ2/EXOSC3/EXO1/ISG20L2/CPSF3/RIDA/DIS3/ELAC2/PDE12/ENDOU/ZC3H12C/RNASE7/ZC3H12D/ENDOG/CNOT1/RPP40/EXOSC2/POP5/SND1/ERI1/ERI2/USB1/EXOSC5/POP4/TSEN34/POP1/NOB1/XRN2/NOCT/KHNYN/CNOT6/MRPL44/SAMHD1/TOE1/SLFN13/DCPS/POP7/RPP30/RPP38/EXOG/TSEN2/ANGEL1
GOBP	LEUKOCYTE CHEMOTAXIS	205	0.387436	1.68913	2.06e-05	0.000313193	0.00021877	4443	tags=39%, list=21%, signal=31%	S100A12/S100A9/CXCR2/C10orf99/WNT5A/NOD2/S100A8/CCL20/CXCR4/C1QBP/S100A7/CCR7/CXCL1/CXCL13/CXCL2/CYP7B1/CXCL16/PPIA/CXCL10/CXCL8/CCL18/CCL4/CCL22/ADAM17/CXCL9/S100A14/CH25H/MIF/CCL2/LYN/CORO1A/SLAMF8/DEFB124/CCL8/SYK/RAC2/IL6/LGALS9/CCL7/CCL19/CCR5/ITGB2/CXCL17/IL23A/CXCL3/GPR183/FFAR2/OXSR1/CXCL6/ADAM10/CXCL11/ADAM8/PIK3CD/SFTPD/CCL5/XCL1/CCR1/PPIB/SRP54/ANXA1/ADGRE2/CCR2/NUP85/CCL17/LGMN/TMEM10…
GOBP	RIBONUCLEOSIDE TRIPHOSPHATE METABOLIC PROCESS	79	0.496928	1.90059	2.03e-05	0.000310007	0.000216545	4360	tags=49%, list=21%, signal=39%	ENO1/RAN/ATP5MF/UCK2/NME1/CTPS1/MFN1/VCP/ATP5MC3/ENTPD7/ATP5PF/ATP5F1B/STOML2/ATP5MC1/IMPDH1/ATP5PB/ALDOA/SLC25A13/ITPA/ATP5ME/ATP5MG/ATP5F1C/GNAI3/UQCC3/ATP5PO/ATP6V1A/ANTKMT/TREM2/PKM/ATP5F1D/PARP1/ATP5F1A/ATP5PD/VPS9D1/NME7/CAD/DNAJC30/EFL1/SLC25A12
GOBP	NEGATIVE REGULATION OF CELL PROJECTION ORGANIZATION	171	-0.365507	-1.70731	2.01e-05	0.000307015	0.000214455	4765	tags=39%, list=23%, signal=30%	SEMA4C/SEMA3C/ARPIN/INPP5F/LRP1/SEMA3A/ARHGAP44/CERS2/PTPN9/TRPC6/LRIG2/RUFY3/TACSTD2/UBE3A/SEMA6D/PTEN/NRP1/SPOCK1/EFNB3/BAG5/ADCY6/NR2F1/MYLIP/ARHGAP24/RTN4R/LRRK2/ZNF365/SEMA3E/NGEF/YAP1/SLIT2/DENND5A/SPART/SEMA4G/NLGN1/TSKU/SEMA6A/EFNA1/FGF13/SEMA3B/RYK/TESK1/APOE/PTPRS/PFN2/LGALS1/TRAK2/ITM2C/MAP2/NTN1/PTPRO/RTN4/RAPGEF2/CBFA2T2/TSC1/RTN4RL1/SEMA3G/LPAR1/FYN/VIM/RGMA/DPYSL3/LRP4/SPRY2/EFNB2/…
GOBP	POSITIVE REGULATION OF INTERLEUKIN 1 PRODUCTION	58	0.553704	2.0079	1.98e-05	0.000304019	0.000212362	3769	tags=48%, list=18%, signal=40%	WNT5A/NOD2/IFI16/FZD5/CLEC7A/PYCARD/CASP1/PANX1/TRIM16/STMP1/STAT3/AIM2/IFNG/IL6/LGALS9/CCL19/PYDC1/CASP8/GSDMD/NLRP2/TLR8/HDAC2/TNF/TYROBP/NLRC4/LILRA2/MNDA/NLRP3
GOBP	CELLULAR RESPONSE TO VIRUS	61	0.537218	1.97156	1.97e-05	0.000302367	0.000211208	3551	tags=46%, list=17%, signal=38%	ZC3H12A/IRF7/C1QBP/NLRX1/IFI6/IFIH1/HIF1A/MMP12/PHB/TRIM15/UFD1/USP15/DDX60/CLPB/IKBKE/DHX58/BIRC3/IL6/LGALS9/CCL19/ADAR/WDFY4/BAX/DDX58/CHUK/PHB2/GSDME/NPLOC4
GOBP	HISTONE EXCHANGE	52	0.567071	2.03246	1.89e-05	0.000291771	0.000203807	5625	tags=62%, list=27%, signal=45%	RUVBL1/PSME4/CENPN/KNL1/CENPW/CENPX/OIP5/HJURP/CENPM/CENPK/CENPA/CENPS/NASP/NPM1/CENPH/CENPI/ZNHIT1/MIS18A/SMARCA5/RNF8/SPTY2D1/CENPL/CENPO/CENPU/H4C4/H4C9/RBBP4/H4C2/SRCAP/CENPQ/H4C5/PIWIL1
GOMF	TRNA BINDING	64	0.534586	1.98147	1.86e-05	0.000286493	0.00020012	4072	tags=52%, list=20%, signal=42%	YARS1/TARS1/MARS1/IARS1/AIMP1/FARSA/METTL1/HSD17B10/RARS1/TRMT10C/IFIT5/XPOT/TYW5/SARS2/NSUN2/PUS1/SARS1/XPO5/YARS2/TRNAU1AP/TRMU/CTU2/DARS2/MRPS27/TRNT1/YRDC/NAT10/DTD2/TRMT1/FARS2/SLFN13/THG1L/CARS1
GOBP	MITOTIC DNA REPLICATION	16	0.781924	2.16522	1.85e-05	0.00028642	0.000200069	2227	tags=69%, list=11%, signal=61%	GINS3/MCM6/RAD51/MCM4/CDC45/GINS1/MCM2/ZMPSTE24/MCM3/BRCA2/CHEK2
GOBP	ATTACHMENT OF SPINDLE MICROTUBULES TO KINETOCHORE	35	0.629598	2.08503	1.85e-05	0.00028642	0.000200069	1894	tags=43%, list=9%, signal=39%	CCNB1/NDC80/KIF2C/AURKB/NEK2/SPAG5/KNL1/NUF2/CENPE/ECT2/RACGAP1/CDT1/ZNF207/RMDN1/RCC2
GOBP	POSITIVE REGULATION OF TELOMERASE RNA LOCALIZATION TO CAJAL BODY	15	0.781383	2.11352	1.84e-05	0.000286197	0.000199913	2945	tags=87%, list=14%, signal=74%	RUVBL1/CCT5/RUVBL2/NHP2/CCT2/CCT3/NOP10/CCT7/TCP1/SHQ1/DKC1/CCT6A/CCT8
GOBP	REGULATION OF DNA METABOLIC PROCESS	340	0.348897	1.59778	1.83e-05	0.000284648	0.000198831	4965	tags=39%, list=24%, signal=30%	KPNA2/PARP9/TFDP1/SUB1/H2AX/UBE2N/FOXM1/PRKCQ/TIGAR/AURKB/CCT5/NEK2/TIMELESS/PCNA/DTX3L/TRIP12/RAD51/PPP4C/CCT2/HNRNPA2B1/CCT3/PARPBP/GNL3/PRMT5/HNRNPC/GZMA/ZMPSTE24/CCT7/STN1/OTUB2/PPP4R2/AUNIP/RAD51AP1/EXOSC3/PINX1/CDT1/MYC/SIRT7/PNKP/FIGNL1/CGAS/ALYREF/WDR18/CDKN1A/RFC2/IL7R/IL6/ENDOG/BLM/ST20/RFC3/XRCC5/NSD2/POLQ/MAD2L2/PIF1/RNF168/PRKDC/TFRC/HMCES/NPM1/BRCC3/UBE2V2/BABAM2/TCP1/DKC1/BRCA1/FBX…
GOCC	SPINDLE MICROTUBULE	69	0.527861	1.97203	1.75e-05	0.000272863	0.000190599	1713	tags=33%, list=8%, signal=31%	CDK1/BIRC5/AURKB/KIF18B/PRC1/KIF4A/AURKA/RAB11A/POLB/TUBG1/KIF2A/KIF11/CENPE/SKA3/SKA2/SKA1/RMDN1/HAUS1/KIF18A/PSRC1/PLK1/RMDN2/TTL
GOBP	REGULATION OF INFLAMMATORY RESPONSE	310	0.353789	1.60725	1.67e-05	0.000261973	0.000182993	4107	tags=32%, list=20%, signal=26%	S100A12/S100A9/NFKBIZ/NMI/WNT5A/NOD2/S100A8/CTSC/PPARD/PBK/NLRX1/MYD88/ABCC1/CASP4/PYCARD/CCR7/LDLR/SOCS3/PLA2G3/F12/CASP1/GSTP1/OSMR/MAPK13/DUOXA1/IDO1/MMP9/IL20/PTPN2/DNASE1L3/TLR2/IFI35/CST7/CEBPB/CASP5/IFNG/ACE2/NFKB1/IL1B/SEMA7A/USP18/LYN/MFHAS1/SLAMF8/SBNO2/IL12B/FANCD2/GPX1/HCK/BIRC3/PSMA1/AOAH/SELE/IL6/CXCL17/IL23A/GRN/FFAR2/IL2RA/PGLYRP2/LPCAT3/VAMP8/ADAM8/TNIP1/HLA-E/TNFRSF1B/VAMP7/PTGE…
GOBP	REGULATION OF CELLULAR KETONE METABOLIC PROCESS	171	0.404776	1.73009	1.67e-05	0.000261411	0.0001826	3212	tags=33%, list=15%, signal=28%	PSME2/FABP5/PSMB2/PSMA5/PSMB5/SLC7A11/PPARD/PSMA3/PSMD12/PSME4/PSMA2/PSME1/PLA2G3/PSMB6/PSMB10/PSMB3/RDH10/PSMD6/EIF6/PSMB8/PSMC4/PSMA4/PSMD2/PSMD11/PSMD1/PSMD14/PSMC3/PSMB9/ADIPOR2/IL1B/PSMA7/STARD4/PSMD9/PSMD8/ADIPOR1/PSMA1/NR4A3/PSMD13/PSMF1/COQ3/PSMC5/PSMC2/PSMB1/PSMC6/PSME3/GSTZ1/PSMD7/PSMC1/OAZ3/PARK7/BRCA1/UGT1A8/OAZ1/PSMB7/ANXA1/PSMD10/MID1IP1
GOBP	DORSAL VENTRAL PATTERN FORMATION	73	-0.484889	-1.96002	1.66e-05	0.000260473	0.000181945	3421	tags=32%, list=16%, signal=26%	IFT172/IFT52/TCTN1/BMP4/DYNC2H1/EDN1/NOG/EN1/HOXB2/NBL1/ACVRL1/TULP3/DDIT3/GREM1/AIDA/BMPR1A/HOXA11/BMPR1B/PTCH1/WDR19/GLI2/LRP4/GLI3
GOCC	SITE OF DNA DAMAGE	90	0.487408	1.90116	1.57e-05	0.000247247	0.000172706	4208	tags=44%, list=20%, signal=36%	PARP9/H2AX/TIMELESS/NABP1/VCP/ARPC1A/HUS1/RPA3/RAD51/ADPRS/ARPC3/AUNIP/ACTR3/SIRT7/CGAS/ARPC2/XRCC5/MAD2L2/PAXX/RNF168/WDR76/ESCO2/RAD18/ARPC5/XRCC4/SMC6/RNF138/PARP1/RNF8/UBQLN4/RFWD3/SAMHD1/CBX3/WAS/NABP2/RAD50/PARP3/SLF1/WRAP53/RPA1
GOBP	NUCLEOSIDE MONOPHOSPHATE METABOLIC PROCESS	73	0.511101	1.92784	1.57e-05	0.000247247	0.000172706	3901	tags=42%, list=19%, signal=35%	TYMP/UPP1/TK1/UCK2/AK2/TYMS/CMPK2/GART/DTYMK/TJP2/APRT/ATIC/IMPDH1/NT5C2/HPRT1/AMPD3/ADSL/XDH/DNPH1/AK1/ADK/UMPS/GMPS/CASK/DCTD/RFK/CARD11/RAD50/CAD/GMPR2/PRPS2
GOBP	FOREBRAIN DEVELOPMENT	349	-0.303318	-1.53825	1.56e-05	0.000247043	0.000172563	3434	tags=28%, list=16%, signal=24%	HOOK3/HSD3B1/RELN/SETD2/TCTN1/PTCHD1/ERBB4/MFSD2A/FOXP2/APP/SIN3A/BMP4/WNT7B/ROBO2/CEP120/HES1/POU3F1/ATRX/CXCL12/NRG3/TBX3/PGAP1/CSNK2A2/BCL11B/RTN4R/LRRK2/PCDH9/DYNC2H1/SLIT2/NOG/PLCB1/SUN2/TSKU/METTL3/FGF13/SYNE2/SHANK3/RYK/BMERB1/LRP6/PTPRS/ARHGAP35/FGFR2/DCLK1/POU3F3/NTRK2/BMPR1A/NR2F2/GSK3B/GDF7/PTN/ZMIZ1/DOCK7/PPARGC1A/SLC8A1/PCM1/SATB2/ALDH1A2/SKI/GNG12/PRKG1/NFIB/RTN4/RBPJ/METTL14/NUMBL/…
GOBP	PROTEIN IMPORT	181	0.404019	1.7347	1.55e-05	0.000246615	0.000172265	4058	tags=39%, list=19%, signal=32%	ZC3H12A/RAN/KPNA2/HSPA4/TOMM22/GRPEL1/TIMM50/MMP12/FERMT1/ZPR1/TIMM17A/TIMM23/HEATR3/ECT2/STAT3/TOMM40L/AIFM1/IPO4/NUP88/IFNG/TOMM40/NUP62CL/CHCHD4/PEX3/BAG3/ROMO1/HSPA8/PDCD5/CDKN1A/SYK/NOLC1/NUP50/CD36/HIKESHI/DNAJC15/NXT1/E2F3/PEX10/CSE1L/ELAVL1/SEC13/TARDBP/TIMM44/KPNB1/PIK3R2/TIMM21/HSPD1/GRPEL2/HCLS1/NUP155/PML/DNLZ/PEX13/PEX2/PKIA/NUP188/PHB2/PRKCD/NUP85/TIMM17B/KPNA3/NUTF2/HDAC3/NUP58/CDH…
GOBP	NUCLEOSIDE TRIPHOSPHATE METABOLIC PROCESS	100	0.480904	1.9142	1.53e-05	0.000243977	0.000170422	3869	tags=45%, list=19%, signal=37%	ENO1/RAN/ATP5MF/UCK2/NME1/CTPS1/MFN1/NUDT15/VCP/ATP5MC3/TYMS/ENTPD7/CMPK2/ATP5PF/ATP5F1B/STOML2/ATP5MC1/DTYMK/IMPDH1/ATP5PB/ALDOA/SLC25A13/ITPA/ATP5ME/AK1/ATP5MG/ATP5F1C/ADK/DCTPP1/GNAI3/UQCC3/NUDT1/ATP5PO/ATP6V1A/ANTKMT/TREM2/PKM/ATP5F1D/PARP1/ATP5F1A/ATP5PD/SAMHD1/VPS9D1/NME7/CAD
GOBP	CELL DIFFERENTIATION IN SPINAL CORD	47	-0.559649	-2.11051	1.51e-05	0.000241165	0.000168458	3421	tags=30%, list=16%, signal=25%	IFT172/TCTN1/LMO4/SOX13/SOX4/DYNC2H1/ZC4H2/HOXC10/GDF7/GATA2/PTCH1/GLI2/GLI3/SOX6
GOMF	BETA CATENIN BINDING	85	-0.468333	-1.95657	1.5e-05	0.000239538	0.000167321	5366	tags=49%, list=26%, signal=37%	MED12/CD2AP/EP300/CDH5/CHD8/CALCOCO1/NUMB/HDAC6/SKP1/DACT2/DVL1/DVL3/CTNNB1/GRIP1/APC/CBY1/PRKN/BTRC/VCL/FOXO1/PXN/PTPRK/PTPRU/DACT1/BCL9/ESR1/CTNNA1/FOXO3/KLF4/GSK3B/SMAD3/DLG5/TCF7L1/TCF7L2/CTNNBIP1/TBL1XR1/AR/GLI3/TCF4/KANK1/AXIN2/RORA
GOBP	CENTRAL NERVOUS SYSTEM NEURON DIFFERENTIATION	172	-0.373327	-1.74152	1.49e-05	0.000239414	0.000167234	3554	tags=28%, list=17%, signal=23%	PTEN/SPOCK1/IFT172/TCTN1/ERBB4/SIN3A/ROBO2/HES1/CBLN1/FZD1/LMO4/BCL11B/SOX4/DYNC2H1/LEP/SLIT2/ZC4H2/EPHB6/TSKU/SHANK3/RYK/TULP3/CSNK1D/LRP6/ARHGAP35/FGFR2/DCLK1/NTRK2/HOXC10/GDF7/ZMIZ1/MAP2/ADARB1/SATB2/HERC1/WNT2/NFIB/NDNF/RAPGEF2/GATA2/PTCH1/PAFAH1B1/EPHB1/NIN/GLI2/GLI3/C12orf57/RORA
GOBP	CELLULAR MODIFIED AMINO ACID METABOLIC PROCESS	180	0.403085	1.73126	1.47e-05	0.000235531	0.000164522	4725	tags=45%, list=23%, signal=35%	ETHE1/GOT2/SLC7A11/GCH1/ALDH7A1/CHAC1/VNN3/AHCY/PLA2G4D/GGH/CHAC2/PLA2G3/PLSCR1/TYMS/GSTP1/GSTO1/CNDP2/GART/DUOXA1/VNN1/SLC16A10/SHMT2/PLA2G2F/ATIC/PDZD11/GSTA4/MTHFD1/MTHFD2/GGCT/SLC5A6/DUOX1/CROT/ALDH4A1/MTRR/GPX1/GCLM/GLRX2/MBOAT2/CTNS/MTHFD1L/DHFR/PTGES2/GDAP1/GSTZ1/LPCAT3/SERINC2/PARK7/PLA2G12A/MGST2/SLC19A1/CPT2/PTDSS2/CPT1C/SERINC5/G6PD/GDAP1L1/GCLC/PLOD2/GCNT4/ABHD16A/OPLAH/SLC25A32/MTHFR…
GOBP	PROTEIN MATURATION	282	0.364451	1.6444	1.46e-05	0.000234414	0.000163742	3874	tags=31%, list=19%, signal=25%	KLK13/ENO1/KLK6/PGK1/IFI16/TMPRSS4/GLRX3/CHAC1/CASP4/PYCARD/PLGRKT/F12/CASP1/ECE2/BAK1/CIAO2A/PRSS3/STOML2/HM13/TIMM17A/ERO1A/PLAT/PCSK9/TMEM208/DNAJB11/ADAM17/AOPEP/CTSL/NDUFAB1/ZMPSTE24/NAA10/TSPAN17/CST7/PSENEN/ACE2/CHCHD4/SRGN/SEC11C/BCL2L12/CIAO2B/PLAU/CISD3/NAA50/PCSK7/PCSK6/ADAM19/METAP2/PCSK1/SNX12/FKBP1B/CARD16/LPCAT3/ADAM10/CASP8/NAA20/ADAM8/FADD/CTSS/SPCS3/RCE1/SNAPIN/FURIN/HSPD1/REN/P…
GOCC	SM LIKE PROTEIN FAMILY COMPLEX	79	0.501528	1.91818	1.44e-05	0.000232754	0.000162582	3142	tags=39%, list=15%, signal=33%	SNRPG/SNRPF/SNRPD1/LSM2/TXNL4A/SF3B3/LSM7/SNRPD3/EFTUD2/SF3B5/LSM1/CD2BP2/SNU13/PPIH/LSM10/SNRPA1/GEMIN6/SNRPC/GEMIN7/SF3B6/LSM5/LSM4/SNRPB/LUC7L2/PRPF31/USP39/STRAP/LSM6/PRPF4/GEMIN2/SNRPA
GOBP	NATURAL KILLER CELL MEDIATED IMMUNITY	60	0.539691	1.97537	1.43e-05	0.000231047	0.00016139	4151	tags=48%, list=20%, signal=39%	SERPINB4/GZMB/SLAMF7/ULBP2/RAB27A/RAET1E/CORO1A/IL12B/SERPINB9/RASGRP1/IL18RAP/LGALS9/SH2D1A/LAG3/HLA-E/VAMP7/NCR3/CRTAM/KLRD1/CD96/HLA-F/HLA-B/LILRB1/UNC13D/NECTIN2/RNF19B/HLA-G/VAV1/TUBB4B
GOBP	RNA 5 END PROCESSING	22	0.712484	2.10911	1.42e-05	0.000229935	0.000160614	4057	tags=68%, list=19%, signal=55%	PNPT1/HSD17B10/TRMT10C/NOP14/RPP40/POP5/RPP25L/ABT1/POP4/POP1/TBL3/POP7/THG1L/RPP30/RPP38
GOBP	KILLING OF CELLS OF OTHER ORGANISM	55	0.563165	2.04253	1.41e-05	0.000229028	0.00015998	2324	tags=36%, list=11%, signal=32%	S100A12/KRT6A/LTF/CLEC7A/APOL1/PGLYRP4/TUSC2/ARG1/PRF1/IFNG/GAPDH/GNLY/NOS2/ROMO1/SERPINB9/SYK/LYZ/CXCL6/CASP8/CAMP
GOBP	REGULATION OF SMOOTH MUSCLE CONTRACTION	55	-0.5301	-2.0471	1.39e-05	0.000227254	0.000158741	2662	tags=38%, list=13%, signal=33%	RGS2/ATP2B1/EDN1/F2R/DOCK5/DOCK4/TACR1/ARHGAP42/P2RX1/ORMDL3/MYOCD/KCNMA1/ADRA1A/PRKG1/ATP1A2/ADRA2A/CNN1/KIT/CAV1/SOD1/ADRB2
GOBP	NADP METABOLIC PROCESS	34	0.641275	2.10519	1.35e-05	0.000220181	0.0001538	3506	tags=53%, list=17%, signal=44%	PGAM1/PGM2/TIGAR/PGD/TALDO1/TP53I3/IDH2/RBKS/FMO1/ME1/SHPK/PGLS/KCNAB2/G6PD/NOCT/DERA/NUDT13/ME2
GOBP	PROTEIN N LINKED GLYCOSYLATION	73	0.513512	1.93694	1.33e-05	0.000218115	0.000152357	4935	tags=53%, list=24%, signal=41%	TMEM165/DPAGT1/SRD5A3/MPDU1/ALG3/PMM2/OSTC/ALG1/ALG14/ALG2/RFT1/ALG8/TUSC3/OST4/ALG13/ALG5/RPN1/ALG6/DDOST/DOLK/TMEM258/DPM2/DOLPP1/ALG10/RPN2/LMAN1/DPM1/EXT2/B4GALT7/STT3B/DAD1/B4GALNT2/UBE2J1/MGAT5/NUDT14/MAGT1/ENTPD5/MGAT5B/ALG12
GOBP	OUTFLOW TRACT MORPHOGENESIS	71	-0.479188	-1.93539	1.32e-05	0.000217478	0.000151912	5056	tags=49%, list=24%, signal=37%	SMAD4/TBX1/SEMA3C/WNT11/ATF2/CTNNB1/TGFB2/PITX2/ELN/FOXC2/NRP1/PLXND1/BMP4/ROBO2/HES1/JAG1/TBX3/DHRS3/NOG/DVL2/TWIST1/PARVA/CLDN5/NPY5R/FOXC1/FGFR2/SEC24B/BMPR1A/MEF2C/NPY1R/RBPJ/TGFBR2/BMP7/ZFPM2/TGFBR3
GOBP	POSITIVE REGULATION OF CELL CYCLE PHASE TRANSITION	93	0.494237	1.94133	1.31e-05	0.000215878	0.000150794	3679	tags=45%, list=18%, signal=37%	CCNB1/DLGAP5/CDK1/TFDP1/UBE2C/CDCA5/RAB11A/EZH2/CDC6/CDC25B/ADAM17/CDC25A/DTL/ANAPC7/FAM83D/KLHL18/CDT1/ESPL1/LSM10/RCC2/SMARCD3/CDC7/CCND2/FBXO5/MAD2L1BP/NPM1/TMOD3/DDRGK1/ANAPC11/PAF1/MTA3/PLRG1/CDC25C/ATAD5/RB1/EIF4G1/ANXA1/CDC23/PHB2/PAGR1/CCND3/CDK4
GOBP	REGULATION OF DEFENSE RESPONSE TO VIRUS	66	0.53629	1.99678	1.27e-05	0.000208856	0.000145889	4034	tags=47%, list=19%, signal=38%	ZC3H12A/STAT1/PARP9/C1QBP/NLRX1/PYCARD/DTX3L/MMP12/ZMPSTE24/UFD1/IFIT1/TARBP2/AIM2/CGAS/IL12B/DHX58/TRAF3/PTPN22/IL23A/ITCH/HERC5/IL2RA/MICB/DDX58/PQBP1/IL12RB1/IL15/NPLOC4/LILRB1/RNF26/ILRUN
GOBP	CYTOCHROME COMPLEX ASSEMBLY	36	0.628212	2.08335	1.24e-05	0.000205673	0.000143666	3964	tags=61%, list=19%, signal=50%	SCO2/HCCS/UQCRFS1/TACO1/COA4/COA1/COA6/SCO1/COA3/SLC25A33/UQCC2/UQCC3/COX10/PET100/COX14/COX17/TIMM21/CYBA/COX16/FASTKD3/BCS1L/UQCC1
GOBP	RESPONSE TO PROTOZOAN	21	0.73838	2.15196	1.2e-05	0.000198278	0.000138501	2310	tags=62%, list=11%, signal=55%	CLEC7A/IL4R/MYD88/GBP6/GBP2/BCL3/ARG1/IRF8/BATF2/IL12B/BATF/HRAS/GBP4
GOMF	MHC CLASS I PROTEIN BINDING	18	0.759529	2.1539	1.19e-05	0.000198278	0.000138501	4151	tags=78%, list=20%, signal=62%	VCP/ATP5F1B/TAP1/TAP2/BCAP31/PILRA/HLA-E/TAPBP/CD8A/ATP5F1A/LILRB2/CD244/LILRB1/TUBB4B
GOBP	LYMPHOCYTE CHEMOTAXIS	51	0.581448	2.08292	1.19e-05	0.000197656	0.000138066	3616	tags=55%, list=17%, signal=45%	C10orf99/WNT5A/CCL20/S100A7/CXCL13/CYP7B1/CXCL16/CXCL10/CCL18/CCL4/CCL22/ADAM17/CH25H/CCL2/CCL8/CCL7/CCL19/GPR183/OXSR1/ADAM10/CXCL11/ADAM8/PIK3CD/CCL5/XCL1/CCR2/CCL17/TMEM102
GOBP	OLIGOSACCHARIDE LIPID INTERMEDIATE BIOSYNTHETIC PROCESS	20	0.745306	2.15409	1.13e-05	0.000189426	0.000132317	3172	tags=70%, list=15%, signal=59%	DPAGT1/SRD5A3/MPDU1/ALG3/ALG1/ALG14/ALG2/RFT1/ALG8/ALG13/ALG6/DOLK/DOLPP1/ALG10
GOBP	TRICARBOXYLIC ACID CYCLE	33	0.652275	2.12044	1.13e-05	0.000189012	0.000132028	4139	tags=58%, list=20%, signal=46%	IDH3A/SUCLG1/MDH2/SDHB/IDH2/IDH3B/ACO2/FH/MDH1/DHTKD1/PDHB/FAHD1/SDHD/DLAT/SDHAF2/DLD/ME2/OGDHL/PDHA1
GOCC	DNA REPLICATION PREINITIATION COMPLEX	12	0.835831	2.11876	1.13e-05	0.000189012	0.000132028	1658	tags=83%, list=8%, signal=77%	GINS3/MCM6/GINS2/MCM4/CDC45/GINS1/MCM5/MCM2/MCM7/MCM3
GOBP	NCRNA 3 END PROCESSING	39	0.613364	2.05742	1.1e-05	0.000185397	0.000129503	3570	tags=46%, list=17%, signal=38%	EXOSC4/EXOSC3/HSD17B10/TRMT10C/ELAC2/POLR3K/EXOSC2/ERI1/ERI2/USB1/INTS7/DKC1/EXOSC5/TRNT1/INTS5/INTS14/EXOSC8/TOE1
GOBP	RELEASE OF CYTOCHROME C FROM MITOCHONDRIA	54	0.57213	2.07247	1.09e-05	0.000184019	0.00012854	3321	tags=48%, list=16%, signal=41%	PPIF/PRELID1/GHITM/FAM162A/PYCARD/IFI6/BAK1/TIMM50/BIK/MMP9/TNFSF10/SFN/GGCT/BID/PDCD5/GPX1/SOD2/PLAUR/BNIP3/BOK/TRIAP1/MFF/BAX/FXN/PSMD10/CIDEB
GOBP	NEUTROPHIL CHEMOTAXIS	93	0.495788	1.94743	1.06e-05	0.000179263	0.000125218	4673	tags=47%, list=22%, signal=37%	S100A12/S100A9/CXCR2/NOD2/S100A8/CCL20/C1QBP/CCR7/CXCL1/CXCL13/CXCL2/PPIA/CXCL10/CXCL8/CCL18/CCL4/CCL22/CXCL9/CCL2/CCL8/SYK/RAC2/CCL7/CCL19/ITGB2/IL23A/CXCL3/CXCL6/CXCL11/PIK3CD/CCL5/XCL1/PPIB/SRP54/CCL17/JAML/VAV1/CKLF/CSF3R/C5AR2/C3AR1/CXCR1/CXCL5/FCER1G
GOCC	CONDENSED NUCLEAR CHROMOSOME KINETOCHORE	17	0.771484	2.15265	1.05e-05	0.000177711	0.000124134	3702	tags=76%, list=18%, signal=63%	CCNB1/NDC80/BUB1B/BUB1/NUF2/CENPK/CENPA/PLK1/PMF1/MIS12/PELI1/CENPO/REC8
GOBP	RESPONSE TO CHEMOKINE	90	0.492017	1.91914	1.05e-05	0.000177711	0.000124134	3438	tags=39%, list=16%, signal=33%	ZC3H12A/CXCR2/CCL20/CXCR4/CCR7/CXCL1/CXCL13/CXCL2/HIF1A/CXCL10/CXCR6/CXCL8/CCL18/CCL4/CCL22/CXCL9/CCL2/CCL8/CCL7/CCL19/CCR5/CIB1/CXCL3/DOCK8/OXSR1/CXCL6/ACKR2/CXCL11/CCL5/TREM2/XCL1/CCR1/CCRL2/CCR2/CCL17
GOBP	MITOTIC SPINDLE ORGANIZATION	115	0.458819	1.86986	1.02e-05	0.000173152	0.000120949	2985	tags=40%, list=14%, signal=34%	CCNB1/CDC20/RAN/DLGAP5/NDC80/SPC25/AURKB/NEK2/PRC1/KIF4A/VCP/AURKA/TPX2/TTK/RAB11A/TUBG1/KIF2A/KIF11/PLK2/TACC3/NUF2/CENPE/KIF23/STIL/RACGAP1/STMN1/BORA/ZNF207/MYBL2/RMDN1/CKAP5/PSRC1/PLK1/BCCIP/INTS13/RCC1/CHEK2/RAE1/CENPH/KPNB1/DCTN6/GPSM2/KIFC1/DRG1/CHMP5/CHMP1B
GOMF	ISOMERASE ACTIVITY	146	0.43238	1.81371	9.91e-06	0.000169342	0.000118288	4963	tags=47%, list=24%, signal=36%	TPI1/PGAM1/PGM2/PPIF/GALE/PPIL1/GFUS/ERP44/TOP1/DHRS9/PPIA/ERO1A/ALOX12B/TOP2A/PMM2/TRUB2/PUSL1/FUOM/MIF/PPIH/P4HB/EBPL/GPI/CYP2S1/PUS10/EBP/CRELD2/THAP4/NAXE/HSD17B4/GLRX2/MPI/FKBP11/PUS1/PTGES2/PDIA4/FKBP1B/GSTZ1/PDIA6/GNPDA1/QSOX1/PUS7/HSPD1/DKC1/RPUSD1/TOP3A/PPIB/FKBP3/TRUB1/KATNA1/PTGES/PTGES3/FKBP4/FKBP2/PPIC/ENOSF1/ENOPH1/MCEE/RPUSD2/PUS3/RPUSD3/TBXAS1/PDILT/PDIA3/HMGCS1/ALOXE3/FKBP1A/BPGM
GOMF	RNA POLYMERASE ACTIVITY	41	0.617779	2.10289	9.61e-06	0.000164758	0.000115086	4846	tags=56%, list=23%, signal=43%	POLR3G/POLR2H/POLR2F/POLR3K/POLR1H/POLR3B/POLR2L/POLR1C/POLR2G/POLR2D/POLR1B/MED21/PRIM1/POLR3D/TRNT1/POLR2E/POLR1G/POLR2I/POLR1A/MED20/POLR2J/POLR3A/POLR2J2
GOBP	APOPTOTIC MITOCHONDRIAL CHANGES	111	0.467349	1.8961	9.54e-06	0.000163959	0.000114528	4105	tags=43%, list=20%, signal=35%	TFDP1/PPIF/SLC25A5/GZMB/PRELID1/HK2/GHITM/FAM162A/PYCARD/IFI6/BAK1/NMT1/TIMM50/BIK/YWHAQ/MMP9/TNFSF10/SFN/GGCT/BLOC1S2/VDAC2/BID/PDCD5/GPX1/SOD2/GCLM/PLAUR/ATG3/CASP8/BNIP3/TMEM14A/BOK/TP63/TRIAP1/YWHAZ/HSPD1/MFF/BAX/FXN/PSMD10/HIP1R/CIDEB/TMEM102/MAPK8/GSK3A/IFIT2/NDUFS1/ATP5IF1
GOBP	MEIOSIS I CELL CYCLE PROCESS	121	0.454541	1.87048	9.04e-06	0.000155661	0.000108732	3702	tags=31%, list=18%, signal=25%	PTTG1/CCNB2/CKS2/AURKA/CCNE1/RAD51/TRIP13/CCNE2/CDC25B/CENPX/PTTG3P/TOP2A/CDC25A/RAD51AP1/SHOC1/ESPL1/BRIP1/SIRT7/MND1/PLK1/FANCD2/CENPS/PSMD13/BRCA2/FBXO5/RAD54L/SGO2/RAD54B/CDC25C/NDC1/ING2/ERCC1/MSH3/EME1/SYCE3/RAD50/REC8
GOBP	SPINDLE ORGANIZATION	177	0.413137	1.76996	8.93e-06	0.000154171	0.000107691	2995	tags=34%, list=14%, signal=29%	CCNB1/CDC20/RAN/DLGAP5/CCNB2/NDC80/SPC25/AURKB/NEK2/PRC1/KIF4A/VCP/ASPM/AURKA/TPX2/TTK/SPAG5/RAB11A/TUBG1/KIF2A/KIF11/PLK2/TACC3/NUF2/CENPE/KIF23/STIL/AUNIP/RACGAP1/RGS14/NTMT1/STMN1/BORA/ESPL1/ZNF207/MYBL2/RMDN1/CKAP5/HAUS1/PSRC1/PLK1/BCCIP/LIMK2/INTS13/RCC1/FBXO5/CHEK2/RAE1/CENPH/KPNB1/DCTN6/GPSM2/KIFC1/MAPRE1/WASHC5/DRG1/MYH9/CHMP5/CHMP1B/NEK6
GOBP	POSITIVE REGULATION OF INTERLEUKIN 12 PRODUCTION	39	0.616514	2.06799	8.78e-06	0.000151942	0.000106134	2619	tags=44%, list=13%, signal=38%	NOD2/CLEC7A/CCR7/IDO1/IRF1/TLR2/LTB/IRF8/IFNG/IL12B/SYK/CD36/LGALS9/CCL19/IL23A/LAPTM5/HSPD1
GOBP	POSITIVE REGULATION OF INTERLEUKIN 6 PRODUCTION	82	0.505418	1.94308	8.65e-06	0.000150151	0.000104883	4807	tags=46%, list=23%, signal=36%	WNT5A/NOD2/CLEC7A/MYD88/PYCARD/PTAFR/IFIH1/MAPK13/AKIRIN2/TLR2/STAT3/IFNG/IL1B/SYK/IL6/CD36/LGALS9/EREG/TSLP/HSPD1/CYBA/TLR8/TNF/CARD9/IL1RL2/DDX58/TYROBP/BCL10/LILRB2/LILRA2/IL17F/XBP1/NLRP10/IL33/AIF1/AGER/TLR1/TICAM1
GOCC	AZUROPHIL GRANULE	146	0.433605	1.81885	8.63e-06	0.000150111	0.000104855	4421	tags=44%, list=21%, signal=35%	SERPINB3/GM2A/FABP5/CTSC/S100A7/PYCARD/GGH/CKAP4/VCP/DNAJC5/ACP3/PRSS2/CCT2/VNN1/FPR1/VAPA/IMPDH1/PLAC8/ARG1/PSMD1/TOLLIP/SERPINA3/SNAP29/TMEM30A/NAPRT/LYZ/PA2G4/SYNGR1/PTGES2/GRN/VAMP8/SURF4/CTSA/CPPED1/GLA/VAMP7/DDOST/ADA2/ARSA/CMTM6/LPCAT1/BST2/TOM1/ARHGAP45/STK11IP/CCT8/PRDX6/CPNE1/PRKCD/CD68/RAB3D/FRK/MNDA/UNC13D/STX3/TRAPPC1/CAP1/AGA/MAN2B1/TUBB4B/CREG1/GALNS/ATP11B/C3AR1
GOBP	MITOCHONDRIAL ATP SYNTHESIS COUPLED PROTON TRANSPORT	21	0.743988	2.1683	8.59e-06	0.000149884	0.000104696	3460	tags=71%, list=17%, signal=60%	ATP5MF/ATP5MC3/ATP5PF/ATP5F1B/STOML2/ATP5MC1/ATP5PB/ATP5ME/ATP5MG/ATP5F1C/ATP5PO/ANTKMT/ATP5F1D/ATP5F1A/ATP5PD
GOBP	POSITIVE REGULATION OF PEPTIDASE ACTIVITY	190	0.412836	1.7836	8.5e-06	0.000148626	0.000103818	3579	tags=38%, list=17%, signal=32%	SERPINB3/S100A9/CYCS/PSME2/SOX7/S100A8/IFI16/PRELID1/CLEC7A/FAM162A/PYCARD/PSME4/PSME1/VCP/CASP1/BAK1/CLPX/NDUFA13/AKIRIN2/PRSS22/CFLAR/TNFSF10/LCK/STAT3/AIM2/PSENEN/AIFM1/PSMD14/BCAP31/HSPE1/MYC/LYN/XDH/BID/CASP10/PDCD5/SYK/PDCD6/ST20/LGALS9/CTSD/TNFRSF10A/ADRM1/GRN/PSME3/BEX3/CASP8/DDRGK1/TNFRSF10B/FADD/LAPTM5/BOK/NLRP2/HSPD1/TNF/DIABLO/CRADD/MAP3K5/CARD9/PML/FASLG/BAX/HTRA2/TNFSF15/TRADD/HIP1R…
GOBP	DEFENSE RESPONSE TO FUNGUS	32	0.65212	2.1052	8.42e-06	0.000147647	0.000103134	1730	tags=34%, list=8%, signal=32%	S100A12/S100A9/C10orf99/LTF/S100A8/IL36RN/ARG1/GAPDH/GNLY/COTL1/RNASE7
GOBP	STRIATED MUSCLE CELL DIFFERENTIATION	244	-0.341852	-1.65232	8.4e-06	0.000147647	0.000103134	4732	tags=40%, list=23%, signal=31%	PAK1/MYOF/DLL1/ERVW-1/IGF1/RBM24/SMAD4/TRIM32/TBX1/TNNT3/FLOT1/CASQ1/MAMSTR/CD9/AKAP6/HDAC4/ERVFRD-1/PI16/MSX1/TMEM119/AVPR1A/DNER/OBSL1/TANC1/KRT8/KAT2A/HDAC9/HDAC5/PLPP7/BMP2/PARP2/CBY1/CAPN3/NOS1/MYMX/KRT19/BMP4/PDGFRB/EHD2/SCGB3A1/SMYD3/CACNA1H/LOX/JAM2/TBX3/BVES/RGS2/PDLIM5/SHOX2/EDN1/CCN3/MYEF2/DKK1/BCL9/ACTC1/TMOD2/ACTA1/MYH3/FZD7/CACYBP/NFATC2/CD81/GREM1/POPDC2/SORBS2/PPARA/MEF2C/SLC8A1/I…
GOBP	DEFENSE RESPONSE TO GRAM POSITIVE BACTERIUM	79	0.509855	1.95003	8.01e-06	0.00014121	9.86e-05	5113	tags=47%, list=25%, signal=35%	KRT6A/C10orf99/NOD2/EPHA2/MYD88/GBP6/PGLYRP4/GBP2/ADAM17/TLR2/ROMO1/TBK1/LYZ/IL7R/RNASE7/IL6/CD36/PGLYRP2/GSDMD/GBP4/CAMP/HLA-E/HMGB2/TNF/CARD9/PGLYRP3/MPEG1/PLA2G2A/H2BC10/IL17F/FGR/H2BC12/PPP1R11/CRP/HLA-A/H2BC6/C5AR1
GOBP	IMMUNOGLOBULIN PRODUCTION	118	0.46897	1.91521	7.92e-06	0.000139989	9.78e-05	4874	tags=42%, list=23%, signal=33%	IL4R/POLB/PHB/SASH3/EXOSC3/EXO1/CGAS/GPI/IL6/BATF/NSD2/POLQ/MAD2L2/RNF168/PRKDC/TFRC/HMCES/HLA-E/XRCC4/TRAV9-2/CD86/LIG4/HSPD1/TNF/XCL1/ERCC1/MSH3/RNF8/STX4/PHB2/TCF3/SAMHD1/TNFRSF4/MZB1/TRDV3/IL10/FOXP3/XBP1/PARP3/TRAF2/CR1/TNFSF13/PTPRC/CD28/IL33/DNAJB9/CD40/TBX21/SLC15A4/HLA-DQB1
GOBP	POSITIVE REGULATION OF INTERLEUKIN 10 PRODUCTION	37	0.634782	2.11288	7.88e-06	0.000139698	9.76e-05	3002	tags=54%, list=14%, signal=46%	CD274/NOD2/CLEC7A/PYCARD/CD83/BCL3/TLR2/STAT3/TUSC2/SASH3/IL12B/TIGIT/SYK/IL6/LGALS9/IL23A/TSLP/HSPD1/TREM2/XCL1
GOBP	POSITIVE REGULATION OF NF KAPPAB TRANSCRIPTION FACTOR ACTIVITY	155	0.429204	1.81659	7.52e-06	0.000133637	9.33e-05	3416	tags=34%, list=16%, signal=29%	S100A12/S100A9/TRIM14/WNT5A/NOD2/LTF/S100A8/UBE2N/MYD88/PRKCQ/PYCARD/IRAK2/PRKCH/CFLAR/TRIM22/PPIA/CARD14/IRAK1/TLR2/STAT3/TRIM15/AIM2/LAMTOR5/RIPK4/NFKB1/IL1B/TRIM62/TRIM21/IL18RAP/RPS6KA4/TRAF1/RIPK3/CD36/LGALS9/ITGB2/CIB1/IKBKG/CARD16/TFRC/NPM1/TRIM5/DDRGK1/DHX33/FLOT2/ADAM8/TNF/CHUK/TRADD/ICAM1/IRAK3/TRIM25/BCL10/NLRC4
GOBP	REGULATION OF FAT CELL DIFFERENTIATION	123	-0.416396	-1.83943	7.4e-06	0.000131885	9.21e-05	4561	tags=45%, list=22%, signal=35%	NAPEPLD/HDAC6/CCDC85B/INSIG1/CCN4/RARRES2/LRP5/BMP2/MEDAG/GPER1/SAV1/FOXO1/SIRT1/HES1/ENPP1/RORC/JAG1/ASXL1/SOX13/JDP2/FTO/WWTR1/YAP1/LEP/LRP3/STK3/ADIPOQ/LMO3/ARNTL/FNDC5/DUSP10/TRIO/PPARG/DDIT3/ZFP36L1/LPL/FRZB/SMAD3/FERMT2/TGFB1I1/ZADH2/BMP7/ZFPM2/GATA2/CCDC3/RUNX1T1/WDFY2/ZBTB16/CREBL2/ZFP36L2/ADIRF/AAMDC/WIF1/GATA3/RORA
GOBP	REGULATION OF CHONDROCYTE DIFFERENTIATION	46	-0.564433	-2.10761	7.12e-06	0.000127241	8.89e-05	4102	tags=50%, list=20%, signal=40%	CCN4/RFLNB/BMP6/BMP4/CCN2/GLG1/SHOX2/CHADL/LNPK/ACVRL1/GREM1/HOXA11/SCIN/BMPR1B/MAF/SMAD3/EFEMP1/ZBTB16/GLI2/GLI3/SOX6/AXIN2/SOX5
GOBP	RESPONSE TO TRANSFORMING GROWTH FACTOR BETA	239	-0.347299	-1.6738	6.77e-06	0.000121337	8.48e-05	5601	tags=45%, list=27%, signal=33%	SMAD2/GDF15/NOX4/RNF111/CIDEA/SFRP1/RHOA/NLK/FBN1/GDF10/COL1A2/FLCN/EP300/NRROS/SMAD4/CDH5/STUB1/LATS1/BAMBI/GDF9/LEMD3/RASL11B/PEG10/PDPK1/HTRA1/USP9X/UBC/LRRC32/ITGB8/APPL1/TGFB2/SMURF1/LTBP2/LDLRAD4/MSTN/SLC2A10/GCNT2/TGFBRAP1/MXRA5/PDE3A/CGN/HTRA4/PXN/SIRT1/SPRED2/PTPRK/DAB2/LOX/GLG1/EDN1/SNW1/CD109/SPRED1/FUT8/FOS/TRIM33/LATS2/CLDN5/ACVRL1/SNX25/CREBBP/DKK3/LTBP4/PTK2/HPGD/FGFR2/SMURF2/ZFP36…
GOBP	EMBRYONIC SKELETAL SYSTEM DEVELOPMENT	114	-0.425768	-1.86919	6.65e-06	0.000119363	8.34e-05	5450	tags=50%, list=26%, signal=37%	ACVR2A/MED12/HOXA5/SULF2/IFT140/HOXA3/HOXB7/TBX1/XYLT1/ALX1/WNT11/MBTD1/PCSK5/CTNNB1/HOXD1/PRRX1/TAPT1/SLC2A10/FOXC2/SETD2/HOXD9/DLG1/BMP4/GNAS/MMP16/TFAP2A/HOXB5/SHOX2/DYNC2I1/NOG/HOXB6/HOXC4/HOXB2/SP3/TWIST1/DMRT2/PCGF2/TULP3/HOXD4/FGFR2/PBX1/RBP4/HOXA11/SATB2/SMAD3/IRX5/TGFBR2/BMP7/HOXB3/OSR1/TBX15/WDR19/PDGFRA/HOXC9/GLI3/OSR2/HOXC6
GOBP	ARTERY MORPHOGENESIS	61	-0.52753	-2.06208	6.55e-06	0.000117904	8.24e-05	4986	tags=51%, list=24%, signal=39%	TBX1/NF1/WNT11/LRP1/HEY1/NPRL3/TGFB2/PRRX1/EFEMP2/FOXC2/NRP1/ADGRF5/BMP4/HES1/PDGFRB/JAG1/SOX4/NOG/ACVRL1/APOE/FOXC1/HPGD/SEC24B/BMPR1A/PKD2/ZMIZ1/AKT3/MYOCD/RBPJ/TFAP2B/MYLK
GOBP	REGULATION OF SMALL MOLECULE METABOLIC PROCESS	409	0.342226	1.5908	5.93e-06	0.000107135	7.48e-05	4450	tags=35%, list=21%, signal=28%	PSME2/ENO1/FABP5/PGAM1/PSMB2/RAN/PSMA5/PSMB5/SLC7A11/PPARD/PSMA3/PSMD12/TIGAR/PSME4/PSMA2/PSME1/PTAFR/VCP/PLA2G3/PSMB6/PHLDA2/PSMB10/PSMB3/RDH10/PSMD6/HIF1A/EIF6/PSMB8/PSMC4/PSMA4/PSMD2/PTPN2/NUP37/MAEA/SLC27A4/SQLE/NUP210/ZMPSTE24/FOXK2/TTC39B/PSMD11/CYP27B1/PSMD1/NUP88/PSMD14/IFNG/PSMC3/PSMB9/ADIPOR2/NFKB1/ABCG1/PPP1CA/IL1B/NOS2/SIRT7/PSMA7/STARD4/PSMD9/PSMD8/ADIPOR1/PSMA1/NUP50/IGFBP3/NR4A3/PS…
GOBP	I KAPPAB KINASE NF KAPPAB SIGNALING	266	0.37865	1.69426	5.92e-06	0.000107135	7.48e-05	3351	tags=32%, list=16%, signal=27%	S100A12/ZC3H12A/TRIM14/STAT1/WNT5A/NOD2/LTF/UBE2N/NLRX1/MYD88/PYCARD/CCR7/HDAC1/IRAK2/CASP1/GSTP1/PLK2/CFLAR/TNFSF10/TRIM22/BCL3/IRAK1/VAPA/ECT2/TLR2/TFG/TNIP3/ZDHHC13/TNIP2/ZFAND6/RHOH/LAMTOR5/RELB/IL1B/TIFAB/IKBKE/TRIM62/TRIM21/FAIM/CASP10/HMOX1/TBK1/IFIT5/PIM2/DEFB124/BIRC3/TRAF1/RIPK3/CD36/TRAF3/LGALS9/CCL19/SLC44A2/SLC20A1/IKBKG/CARD16/TFRC/CASP8/TRIM5/DDRGK1/TNFRSF10B/FADD/LILRB4/TNIP1/REL/…
GOBP	REGULATION OF LYMPHOCYTE MEDIATED IMMUNITY	147	0.430932	1.81289	5.83e-06	0.000105887	7.4e-05	5845	tags=55%, list=28%, signal=40%	SERPINB4/NOD2/FZD5/RSAD2/CYRIB/SUSD4/ARG1/SASH3/EXOSC3/IL1B/RAET1E/IL12B/SERPINB9/RASGRP1/IL18RAP/IL7R/IL6/RIPK3/LGALS9/SH2D1A/IL23A/NSD2/MAD2L2/LAG3/TFRC/HMCES/FADD/LILRB4/HLA-E/TNFRSF1B/NCR3/HSPD1/CRTAM/TNF/XCL1/KLRD1/CD1B/CLEC4G/HLA-DRA/IL12RB1/CD96/CCR2/B2M/HLA-F/WAS/HLA-B/LILRB1/NECTIN2/NLRP3/HLA-G/VAV1/IL10/FOXP3/PARP3/TRAF2/FBXO38/CR1/TNFSF13/CD1D/PTPRC/CD28/MALT1/AGER/CD40/TBX21/SLC15A4/A…
GOBP	DNA GEOMETRIC CHANGE	110	0.474373	1.91666	5.83e-06	0.000105887	7.4e-05	3779	tags=36%, list=18%, signal=30%	RUVBL1/ASCC3/MCM6/HMGB3/RUVBL2/RAD51/MCM4/HNRNPA2B1/MCM5/MCM2/ERCC6L/TOP2A/SSBP1/BRIP1/MCM7/RBX1/XRCC6/RFC2/MCM3/DNA2/BLM/RFC3/XRCC5/POLQ/PIF1/CETN2/RAD54L/TWNK/HMGB2/RAD54B/ERCC8/PARP1/HMGA1/ANXA1/RFC4/CHD7/MCM9/RAD50/DQX1/RECQL4
GOBP	NUCLEOBASE CONTAINING COMPOUND TRANSPORT	238	0.385541	1.71207	5.81e-06	0.000105887	7.4e-05	4423	tags=39%, list=21%, signal=31%	RAN/EIF4A3/SLC25A5/DDX39A/SLC35B1/EIF4E/EIF6/HNRNPA2B1/NCBP1/SRSF9/NUP37/PNPT1/NUP210/CPSF6/NUP88/SLC28A3/NUP62CL/EPG5/MX2/CPSF3/ALYREF/CKAP5/MAGOHB/ABCE1/SLC25A25/SLC25A33/SLC25A51/NUP50/XPOT/NOL6/SARNP/NSUN2/SRSF2/NXT1/ZFP36/TST/CETN2/NPM1/POLR2D/MRPL18/RAE1/NCBP3/MVP/XPO5/SRSF7/SEC13/SRSF1/SLC25A19/THOC5/IWS1/NRDE2/NUP155/IGF2BP3/SLC19A1/SLC35A4/THOC6/THOC7/NDC1/YBX1/CPSF4/SLC35B4/GLE1/MAGOH/N…
GOCC	GLYCOPROTEIN COMPLEX	19	-0.759661	-2.24885	5.81e-06	0.000105887	7.4e-05	2163	tags=68%, list=10%, signal=61%	KRT19/SNTB2/SGCD/SGCA/SSPN/DAG1/SGCE/SGCB/DMD/PGM5/SGCG/UTRN/SNTB1
GOBP	NEGATIVE REGULATION OF RESPONSE TO BIOTIC STIMULUS	95	0.496114	1.9573	5.78e-06	0.000105887	7.4e-05	4034	tags=44%, list=19%, signal=36%	SERPINB4/NMI/LTF/IFI16/C1QBP/NLRX1/MMP12/PTPN2/PARP14/SUSD4/UFD1/TARBP2/ARG1/TRIM21/SLAMF8/SERPINB9/DHX58/LYAR/LGALS9/TTLL12/ADAR/ITCH/GRN/IL2RA/CARD16/NLRC5/HLA-E/NLRC3/MICB/KLRD1/IRAK3/CD96/YTHDF2/HLA-F/SAMHD1/NPLOC4/LILRA2/HLA-B/LILRB1/HLA-G/RNF26/ILRUN
GOBP	LEUKOCYTE PROLIFERATION	299	0.367165	1.66713	5.73e-06	0.000105454	7.37e-05	4848	tags=39%, list=23%, signal=31%	CD24/CD274/PNP/SLC7A1/MYD88/TNFRSF21/PRKCQ/PYCARD/CTPS1/PSMB10/GSTP1/IDO1/IRF1/PLA2G2F/HPRT1/ARG1/SASH3/CEBPB/JAK3/MIF/IL1B/LYN/CD6/CORO1A/TBK1/IL12B/CDKN1A/RASGRP1/CCL8/GLMN/SYK/IKZF3/IL7R/RAC2/IL6/RIPK3/LGALS9/CCL19/PTPN22/IL23A/GPR183/DOCK8/FKBP1B/IL2RA/TFRC/HLA-DMB/FADD/LILRB4/HLA-E/TNFRSF1B/TNFSF9/CD86/HSPD1/CRTAM/TMEM131L/SCRIB/HELLS/BST2/SFTPD/CCL5/DNAJA3/LEF1/EBI3/TREM2/XCL1/BAX/CD3E/CLEC…
GOBP	RESPONSE TO OXYGEN LEVELS	368	0.349462	1.61235	5.63e-06	0.00010397	7.26e-05	3928	tags=32%, list=19%, signal=26%	CD24/PSME2/ENO1/CCNB1/PSMB2/HIGD1A/PGK1/PSMA5/PSMB5/CXCR4/HMOX2/EIF4EBP1/PPARD/HK2/PSMA3/PSMD12/TIGAR/FAM162A/AHCY/PSME4/PSMA2/PSME1/CYB5R4/PSMB6/ATP6V0D1/CASP1/PSMB10/PSMB3/ANGPTL4/PSMD6/POLB/HIF1A/PSMB8/PSMC4/CCNA2/PSMA4/CFLAR/ATP6V1G1/ERO1A/PSMD2/IRAK1/ALAS1/ELOC/ADAM17/TLR2/LDHA/ELOB/AGTRAP/PSMD11/PSMD1/PSMD14/PSMC3/PSMB9/CHCHD2/SLC2A1/BRIP1/NOS2/MYC/PSMA7/P4HB/PSMD9/PSMD8/DNMT3B/HMOX1/CDKN1A…
GOBP	REGULATION OF ADAPTIVE IMMUNE RESPONSE	163	0.426654	1.81978	5.36e-06	9.91e-05	6.92e-05	4902	tags=45%, list=23%, signal=35%	ZC3H12A/CD274/NFKBIZ/IRF7/NOD2/FZD5/IL4R/PRKCQ/PYCARD/RSAD2/IRF1/CYRIB/SAMSN1/SUSD4/ARG1/SASH3/JAK3/EXOSC3/IL1B/CD48/IL12B/IL7R/IL6/RIPK3/CCL19/IL23A/NSD2/MAD2L2/TFRC/HMCES/FADD/LILRB4/HLA-E/TNFRSF1B/HSPD1/TNF/NFKBID/XCL1/KLRD1/CD1B/CLEC4G/ANXA1/HLA-DRA/IL12RB1/CCR2/B2M/HLA-F/WAS/HLA-B/LILRB1/NECTIN2/NLRP3/TNFSF13B/HLA-G/CD80/IL10/FOXP3/PARP3/TRAF2/FBXO38/CR1/TNFSF13/CD1D/NLRP10/PTPRC/CD28/MALT1/…
GOBP	MATURATION OF SSU RRNA	49	0.596506	2.12246	5.32e-06	9.88e-05	6.9e-05	3675	tags=53%, list=18%, signal=44%	MRPS11/RRP36/TSR1/DCAF13/BYSL/SNU13/NOL10/WDR46/UTP4/DDX52/NOP14/FAM207A/RPP40/UTP6/LSM6/ABT1/RIOK1/NAT10/NOB1/TBL3/WDR3/NOL11/RRS1/RIOK2/HEATR1/UTP3
GOBP	KINETOCHORE ORGANIZATION	22	0.727518	2.15361	5.04e-06	9.38e-05	6.55e-05	2384	tags=68%, list=11%, signal=60%	DLGAP5/NDC80/CENPN/CENPW/CENPF/CENPX/NUF2/CENPE/CENPK/CENPA/CDT1/SMC2/SMC4/CENPS/CENPH
GOBP	ATP SYNTHESIS COUPLED PROTON TRANSPORT	24	0.728611	2.19548	5.03e-06	9.38e-05	6.55e-05	4092	tags=75%, list=20%, signal=60%	ATP5MF/ATP5MC3/ATP5PF/ATP5F1B/STOML2/ATP5MC1/ATP5PB/ATP5ME/ATP5MG/ATP5F1C/ATP5PO/ATP6V1A/ANTKMT/ATP5F1D/ATP5F1A/ATP5PD/VPS9D1/DNAJC30
GOBP	NEGATIVE REGULATION OF CYTOKINE PRODUCTION	270	0.376534	1.68792	4.6e-06	8.6e-05	6.01e-05	3769	tags=33%, list=18%, signal=27%	ZC3H12A/CD24/CD274/NMI/CDH3/NOD2/LTF/EPHA2/SERPINB1/UBE2L6/C1QBP/NLRX1/TNFRSF21/IL36RN/PYCARD/CCR7/IFIH1/ISG15/CD83/GSTP1/IDO1/GBP1/BCL3/TUSC2/TRIB2/UFD1/ARG1/JAK3/IFNG/NFKB1/RELB/IKBKE/SRGN/CSK/HMOX1/TBK1/IL12B/DHX58/TIGIT/RPS6KA4/IL6/LGALS9/PTPN22/IL23A/ZFP36/LAG3/ITCH/HERC5/CARD16/PGLYRP2/SARS1/NLRC5/LILRB4/LAPTM5/SLAMF1/REL/HOMER3/LILRA4/FURIN/CLEC4A/BST2/SFTPD/TLR8/TNF/LEF1/NLRC3/TREM2/PML/C…
GOBP	CELLULAR KETONE METABOLIC PROCESS	239	0.38888	1.72516	4.58e-06	8.59e-05	6e-05	3212	tags=31%, list=15%, signal=26%	KYNU/AKR1B10/PSME2/FABP5/TPI1/PDSS1/PSMB2/GOT2/PSMA5/PSMB5/SLC7A11/PPARD/PSMA3/PSMD12/PSME4/PSMA2/PSME1/PLA2G3/PSMB6/PSMB10/PSMB3/RDH10/PSMD6/EIF6/PSMB8/NMT1/PSMC4/NDUFA9/DHRS9/PSMA4/IDO1/PSMD2/CBR3/PSMD11/PSMD1/PSMD14/PSMC3/PSMB9/ADIPOR2/IL1B/HSD17B10/OXCT1/PSMA7/TDO2/STARD4/PSMD9/PSMD8/ADIPOR1/FDXR/COQ2/PSMA1/NR4A3/PSMD13/PSMF1/COQ3/PSMC5/PSMC2/PSMB1/PSMC6/PSME3/COQ9/GSTZ1/PSMD7/PSMC1/OAZ3/PARK…
GOBP	REGULATION OF ACTIN FILAMENT BUNDLE ASSEMBLY	97	-0.454628	-1.95782	4.53e-06	8.53e-05	5.96e-05	4675	tags=47%, list=22%, signal=37%	WNT11/SYNPO/PAK2/PHLDB2/S1PR1/FRMD7/ARHGEF10L/PRKN/TACSTD2/RDX/NRP1/TAC1/ASAP3/PXN/ABL1/CCN2/WASF2/RGCC/SWAP70/CLASP1/S100A10/ARHGEF15/RAPGEF3/MET/ALMS1/SHANK3/TESK1/SORBS3/PFN2/ARHGEF5/ROCK2/ARHGAP6/SMAD3/FERMT2/SDC4/MYOC/TSC1/LPAR1/LIMCH1/CORO2B/PIK3R1/DLC1/SYNPO2/TPM1/CGNL1/ARHGEF10
GOMF	PROTEIN DISULFIDE OXIDOREDUCTASE ACTIVITY	20	0.761708	2.20149	4.52e-06	8.53e-05	5.95e-05	2585	tags=55%, list=12%, signal=48%	GLRX3/SCO2/ERO1A/TXNRD1/CHCHD4/GLRX2/PTGES2/SH3BGRL3/TXN/TXN2/TXNRD3
GOBP	POSITIVE REGULATION OF PRODUCTION OF MOLECULAR MEDIATOR OF IMMUNE RESPONSE	95	0.498718	1.96758	4.37e-06	8.28e-05	5.78e-05	4814	tags=52%, list=23%, signal=40%	WNT5A/NOD2/FZD5/CLEC7A/IL4R/RSAD2/SLC7A5/SASH3/EXOSC3/IL1B/SEMA7A/GPI/NR4A3/IL6/CD36/KLK7/PTPN22/NSD2/MAD2L2/FFAR2/TFRC/HMCES/LAPTM5/HLA-E/DDX21/XCL1/DDX58/STX4/BCL10/B2M/HLA-F/TNFRSF4/CD244/LILRB1/NLRP3/MZB1/HLA-G/IL10/IL17F/XBP1/TRAF2/TNFSF13/PTPRC/CD28/MALT1/IL33/CD40/TICAM1/TBX21
GOBP	CELL CELL SIGNALING BY WNT	495	-0.287456	-1.50471	4.37e-06	8.28e-05	5.78e-05	4102	tags=34%, list=20%, signal=28%	CCN4/TNIK/DAAM1/TNRC6A/TMEM170B/SMURF1/LRP5/ARL6/BMP2/AGO3/GRK5/PDE6A/APC/PPM1B/EDA/CBY1/ILK/GNAQ/PRKN/BTRC/JRK/PTEN/VGLL4/TNN/WNT5B/SFRP5/LGR4/RNF220/LGR6/NPHP4/PRICKLE1/APP/ABL1/WNT7B/DAB2/DACT3/PTPRU/FZD1/GNB1/RSPO3/CSNK2A2/SOX10/RNF43/LRRK2/MLLT3/SOX13/SOX4/WWTR1/RECK/YAP1/LRRFIP2/AMOTL2/NKD1/MACF1/STK3/WNK1/NOG/PLCB1/DVL2/FZD3/DACT1/ROR1/DKK1/TSKU/ARNTL/BCL9/FZD10/VPS26A/LGR5/GNG2/ESR1/CPE/H…
GOBP	MODULATION OF PROCESS OF OTHER ORGANISM	116	0.468677	1.9102	4.35e-06	8.27e-05	5.78e-05	3477	tags=39%, list=17%, signal=33%	KRT6A/S100A9/ZC3H12A/KPNA2/IFI27/LTF/CLEC7A/SLPI/HDAC1/TYMS/PHB/VAPA/CCL4/ARG1/PRF1/IFNG/PSMC3/NOS2/ATG5/HSPA8/SERPINB9/CCL8/SYK/RNASE7/ATG7/CXCL6/CASP8/GSDMD/TNIP1/SUGT1/TARDBP/KPNB1/HIPK2/SCRIB/SFTPD/CCL5/LEF1/CFL1/SMARCA4/TAF11/PPIB/CPSF4/PHB2/PC/KPNA3
GOBP	AMEBOIDAL TYPE CELL MIGRATION	405	-0.302113	-1.54408	4.3e-06	8.21e-05	5.74e-05	4056	tags=36%, list=19%, signal=30%	HDAC9/APPL1/HDAC5/TGFB2/SERPINF1/LRP5/PITX2/PRKD2/ANGPT1/DMTN/EDN3/PIK3CA/SCARB1/TACSTD2/MAP2K5/TNFSF12/SEMA6D/PTEN/FOXC2/FSTL1/NRP1/CYP1B1/PRKCE/PLXND1/IQSEC1/VEGFC/ACVR1C/GNA12/TAC1/FGF1/PKN2/EGR3/PKN1/ERBB4/PXN/SIRT1/ABL1/BMP4/SRPX2/JCAD/PDXDC1/SMOC2/KITLG/AGT/WASF2/PRKD1/RGCC/BCAS3/TMSB4X/NRTN/CENPV/DDR2/SOX10/SEMA3E/AMOT/CLASP1/PTPRM/STAT5A/EDN1/AMOTL2/CLEC14A/SYDE1/MACF1/SLIT2/CCN3/SPRED1/S…
GOBP	NEGATIVE REGULATION OF INNATE IMMUNE RESPONSE	61	0.559615	2.05376	4.23e-06	8.1e-05	5.66e-05	3854	tags=49%, list=18%, signal=40%	SERPINB4/NMI/IFI16/NLRX1/MMP12/PTPN2/PARP14/SUSD4/ARG1/TRIM21/SLAMF8/SERPINB9/DHX58/LYAR/LGALS9/TTLL12/ADAR/GRN/NLRC5/HLA-E/NLRC3/KLRD1/IRAK3/CD96/YTHDF2/HLA-F/SAMHD1/HLA-B/LILRB1/HLA-G
GOMF	CYTOKINE RECEPTOR BINDING	248	0.389635	1.73036	4.16e-06	7.98e-05	5.57e-05	4580	tags=38%, list=22%, signal=30%	IL36G/C10orf99/STAT1/CCL20/LRG1/MYD88/IL36RN/PYCARD/CXCL1/CXCL13/CXCL2/YARS1/OSMR/CNIH4/TIMM50/IL36A/CXCL16/CFLAR/TNFSF10/IL20/CXCL10/CXCL8/CCL18/CCL4/CCL22/ADAM17/CXCL9/S100A14/USP15/LTB/IFNG/TOLLIP/TRAP1/MIF/IL1B/CCL2/IL1RN/BID/IL12B/SHC1/CCL8/SYK/NARS1/TRAF1/IL6/TRAF3/CCL7/CCL19/IL23A/CXCL3/ITCH/BEX3/CXCL6/CASP8/CXCL11/FADD/BABAM2/SIVA1/IL13RA1/TNFSF9/TSLP/CCL5/TNF/IL36B/FASLG/NES/XCL1/TNFSF15…
GOBP	PROTEIN FOLDING	214	0.40499	1.77619	4.1e-06	7.9e-05	5.52e-05	5202	tags=47%, list=25%, signal=36%	PPIF/DNAJB6/CCT5/PPIL1/VCP/HSPA4L/RUVBL2/ERP44/GRPEL1/DNAJC5/CLPX/DNAJA2/HSPA5/CCT2/MKKS/PPIA/CCT3/ERO1A/MPDU1/DNAJB11/HSPA14/HSPA9/TTC1/CCT7/TRAP1/MESD/CHCHD4/HSPE1/BAG3/PPIH/P4HB/HSPA8/PDCD5/HSPH1/CSNK2A1/GNAI3/TOR1A/PDIA4/GRN/DNAJB1/FKBP1B/VBP1/HSPBP1/PSMC1/NUDCD2/PDIA6/SDF2L1/DNAJC7/QSOX1/TCP1/TOR2A/PFDN4/HSPD1/GRPEL2/CHORDC1/NGLY1/CCT6A/PDRG1/CANX/DNAJA3/CDC37/CCT8/DNLZ/UNC45A/PPIB/DNAJC2/GN…
GOCC	SNO S RNA CONTAINING RIBONUCLEOPROTEIN COMPLEX	25	0.713996	2.15089	3.88e-06	7.49e-05	5.24e-05	3967	tags=76%, list=19%, signal=62%	NHP2/SNRPF/NOP10/SNU13/NOP58/NOP56/NOLC1/RPP40/RRP9/GAR1/POP5/RPP25L/DKC1/LSM6/POP4/POP1/SNRNP40/POP7/RPP30
GOBP	NEGATIVE REGULATION OF IMMUNE SYSTEM PROCESS	368	0.35293	1.62835	3.86e-06	7.48e-05	5.22e-05	4262	tags=34%, list=20%, signal=28%	SERPINB4/ZC3H12A/CD274/NMI/NOD2/LTF/GPR68/IFI16/C1QBP/IL4R/NLRX1/NME1/TNFRSF21/LDLR/HMGB3/MMP12/IDO1/GBP1/PTPN2/IRF1/PLA2G2F/PARP14/HSPA9/SAMSN1/SUSD4/UFD1/TARBP2/CST7/ARG1/CEBPB/JAK3/MIF/CCL2/MYC/TRIM21/LYN/SOCS1/CBFB/HMOX1/SLAMF8/IL12B/SERPINB9/DHX58/GPX1/TIGIT/PSMA1/ZC3H8/GLMN/IL7R/LYAR/PVRIG/LGALS9/TTLL12/FCRLB/PTPN22/SH2D1A/LAG3/ADAR/ITCH/GRN/PRKDC/IL2RA/PGLYRP2/GPR137B/NLRC5/FADD/LILRB4/LAP…
GOCC	RIBOSOME	213	0.398139	1.74714	3.73e-06	7.24e-05	5.06e-05	2788	tags=34%, list=13%, signal=30%	MRPL15/MRPL51/RPL26L1/MRPL35/MRPS11/MRPS7/MRPL47/MRPL13/MCTS1/MRPS16/MRPS15/ISG15/MRPL46/MRPS12/MRPL37/MRPS17/MRPL3/MRPL27/SERP1/MRPL36/AURKAIP1/RPL22L1/MRPL11/CHCHD1/MRPL17/MRPL42/MRPS25/NDUFA7/MRPL52/GADD45GIP1/PNPT1/HSPA14/NDUFAB1/MRPL32/MRPL14/MRPS21/MRPS22/MRPS14/MRPL20/MRPS33/MRPL58/MRPL54/MRPS18C/MTG1/MRPL19/MRPL50/MRPL4/MRPL16/MRPL22/MRPS36/MRPL12/MRPL21/MRPL41/MRPL39/MRPL23/MPV17L2/MRPL2…
GOBP	NUCLEAR TRANSPORT	324	0.364725	1.66265	3.71e-06	7.23e-05	5.05e-05	4021	tags=36%, list=19%, signal=30%	ZC3H12A/RAN/KPNA2/IFI27/EIF4A3/DDX39A/EIF4E/SNRPG/EIF6/MMP12/SNRPF/FERMT1/SNRPD1/HNRNPA2B1/ZPR1/NCBP1/SRSF9/NUP37/HEATR3/SFN/ECT2/HSPA9/STAT3/NUP210/CPSF6/RGS14/IPO4/SNRPD3/NUP88/IFNG/NUP62CL/IL1B/MX2/SIRT7/BAG3/CPSF3/ALYREF/CDK5/GEMIN6/MAGOHB/ABCE1/GEMIN7/CDKN1A/SYK/NOLC1/NUP50/XPOT/NOL6/CD36/SARNP/HTATIP2/NSUN2/HIKESHI/SNRPB/SRSF2/NXT1/XPO6/E2F3/CSE1L/RANGAP1/NPM1/ELAVL1/POLR2D/RAE1/XPO5/SRSF7/…
GOBP	POSITIVE REGULATION OF LEUKOCYTE MEDIATED IMMUNITY	115	0.469065	1.91162	3.68e-06	7.19e-05	5.02e-05	5845	tags=60%, list=28%, signal=43%	NOD2/FZD5/CLEC7A/PTAFR/RSAD2/CYRIB/ARG1/SASH3/EXOSC3/IL1B/NOS2/RAET1E/IL12B/RASGRP1/CD177/IL18RAP/IL6/ITGB2/SH2D1A/IL23A/NSD2/MAD2L2/LAG3/TFRC/HMCES/FADD/HLA-E/NCR3/HSPD1/CRTAM/TNF/DDX21/XCL1/KLRD1/CD1B/DDX58/HLA-DRA/IL12RB1/TYROBP/STX4/B2M/HLA-F/HLA-B/NECTIN2/NLRP3/HLA-G/VAV1/FOXP3/TRAF2/FBXO38/TNFSF13/CD1D/PTPRC/CD28/MALT1/CD40/TICAM1/TBX21/HLA-A/SLAMF6/PVR/MLH1/KMT5C/IL1R1/CLCF1/LTA/TP53BP1/CD…
GOMF	NUCLEOTIDYLTRANSFERASE ACTIVITY	120	0.463213	1.90271	3.67e-06	7.18e-05	5.02e-05	5019	tags=48%, list=24%, signal=37%	POLR3G/OAS2/OAS1/POLE2/GMPPB/POLB/POLR2H/POLE4/POLR2F/PNPT1/OAS3/CMAS/NUDT5/CGAS/COASY/POLE3/NANS/POLR3K/POLR1H/MOCS3/POLR3B/POLR2L/TUT7/POLR1C/POLQ/POLR2G/POLR2D/FLAD1/POLR1B/MED21/PRIM1/CTU2/POLR3D/DKC1/TRNT1/YRDC/POLR2E/POLR1G/POLD4/PAPSS2/GMPPA/POLD3/POLR2I/PTGES3/POLR1A/THG1L/MED20/PCYT2/POLR2J/POLD1/PAPOLA/SELENOO/POLR3A/TENT5B/POLR2J2/POLG/TAMM41/RNGTT
GOBP	PROTEIN LOCALIZATION TO ENDOPLASMIC RETICULUM	137	-0.425948	-1.92791	3.52e-06	6.91e-05	4.83e-05	4844	tags=54%, list=23%, signal=42%	RPS12/TRAM2/RPS7/RPS18/KDELR1/RPL19/GABARAPL2/RPL35/MIA3/INSIG1/RAB3GAP2/SRP14/RPL37A/SEC16A/TAPT1/TRAM1/RPL24/RPS11/RPS5/RPS9/RPL41/RPL23A/SGTB/RPS25/RPS15A/HERPUD1/RPS15/LRRK2/RPL13A/RPL32/RPL7A/RPS27/RPL31/RPL18/RPL27/RPS8/RPL4/CHMP4B/RPL12/RPL9/RPS6/RPL13/ANK2/BCAP29/RPL10A/SEC62/RPL11/RPL37/RPL14/RPS4X/RPLP2/RPS14/RPLP1/RPL8/RPS17/RPS24/RPL22/RTN4/RPS23/RPL23/RAB3GAP1/RPL38/TRAM1L1/RPS20/RPL…
GOBP	GRANULOCYTE CHEMOTAXIS	114	0.470977	1.91443	3.4e-06	6.7e-05	4.68e-05	4773	tags=46%, list=23%, signal=35%	S100A12/S100A9/CXCR2/NOD2/S100A8/CCL20/C1QBP/S100A7/CCR7/CXCL1/CXCL13/CXCL2/PPIA/CXCL10/CXCL8/CCL18/CCL4/CCL22/CXCL9/S100A14/CCL2/CCL8/SYK/RAC2/CCL7/CCL19/ITGB2/CXCL17/IL23A/CXCL3/CXCL6/CXCL11/PIK3CD/CCL5/XCL1/PPIB/SRP54/ANXA1/ADGRE2/CCL17/JAML/VAV1/CKLF/CSF3R/C5AR2/HRH1/AKIRIN1/C3AR1/CXCR1/CXCL5/FCER1G/MAPK3
GOBP	MITOCHONDRIAL ELECTRON TRANSPORT UBIQUINOL TO CYTOCHROME C	11	0.865993	2.1491	3.23e-06	6.39e-05	4.46e-05	2797	tags=91%, list=13%, signal=79%	CYCS/UQCRQ/UQCRH/UQCRFS1/UQCR10/UQCR11/CYC1/UQCC3/UQCRC2/UQCRC1
GOBP	NEGATIVE REGULATION OF CHROMOSOME ORGANIZATION	87	0.507459	1.97083	3.18e-06	6.3e-05	4.4e-05	3940	tags=45%, list=19%, signal=37%	CCNB1/CDC20/PTTG1/NDC80/BUB1B/AURKB/MAD2L1/ZWINT/TTK/BUB1/TRIP13/CENPF/MCM2/PTTG3P/TOP2A/HNRNPC/NAA10/STN1/PINX1/CDT1/ESPL1/ZNF207/PLK1/GEN1/MAD2L2/PIF1/FBXO5/MAD2L1BP/LCMT1/NAT10/ERCC1/PARP1/TINF2/GNL3L/SPDL1/KNTC1/RAD50/PSMG2/BUB3
GOBP	REGULATION OF NUCLEAR DIVISION	129	0.459353	1.90023	3.18e-06	6.3e-05	4.4e-05	2455	tags=32%, list=12%, signal=28%	CCNB1/CDC20/WNT5A/DLGAP5/MKI67/NDC80/BUB1B/NUSAP1/AURKB/NEK2/MAD2L1/ZWINT/AURKA/TTK/TGFA/BUB1/TRIP13/SMPD3/AURKAIP1/CENPF/PRMT5/ANAPC7/RAD51AP1/CDT1/BORA/IL1B/ESPL1/ZNF207/PLK1/KIF20B/GEN1/RCC1/PKMYT1/MAD2L2/EREG/FBXO5/MAD2L1BP/TOM1L1/LCMT1/FBXW5/ANAPC11
GOBP	CELL CYCLE CHECKPOINT	203	0.406009	1.76758	3.1e-06	6.18e-05	4.32e-05	3136	tags=33%, list=15%, signal=29%	CCNB1/CDC20/CDK1/TFDP1/NDC80/H2AX/BUB1B/AURKB/TIMELESS/NABP1/PCNA/MAD2L1/ZWINT/AURKA/TTK/BUB1/CDC6/HUS1/CDC45/TRIP13/ZWILCH/FBXO6/PLK2/CENPF/SFN/E2F8/DTL/CDT1/CHFR/ZNF207/BRIP1/DONSON/CNOT11/CDKN1A/ORC1/PLK1/FANCD2/DNA2/GEN1/PLK3/BLM/NSUN2/MAD2L2/CNOT1/MAD2L1BP/PRKDC/WDR76/CHEK2/BRCC3/LCMT1/BABAM2/CLSPN/TRIAP1/INTS7/THOC5/BRCA1/DOT1L/FBXO4/CDK2/CRADD/CDC25C/PML/BAX/GADD45A/PRMT1/MDM2/EME1/RFWD3
GOBP	NEGATIVE REGULATION OF IMMUNE RESPONSE	141	0.446683	1.86238	3.04e-06	6.07e-05	4.24e-05	5020	tags=45%, list=24%, signal=35%	SERPINB4/ZC3H12A/NMI/NOD2/IFI16/IL4R/NLRX1/MMP12/PTPN2/PARP14/SAMSN1/SUSD4/ARG1/JAK3/TRIM21/LYN/HMOX1/SLAMF8/IL12B/SERPINB9/DHX58/GPX1/PSMA1/IL7R/LYAR/LGALS9/TTLL12/FCRLB/ADAR/GRN/IL2RA/PGLYRP2/NLRC5/LILRB4/HLA-E/NLRC3/XCL1/KLRD1/PGLYRP3/CLEC4G/ANXA1/IRAK3/CD96/CCR2/YTHDF2/HLA-F/SAMHD1/HLA-B/LILRB1/HLA-G/CD300A/IL10/FOXP3/PARP3/CR1/PTPRC/IL33/FOXF1/TBX21/ARRB2/SELENOS/IFNA2/MUL1/HLA-A
GOBP	PROTEASOMAL PROTEIN CATABOLIC PROCESS	467	0.337845	1.58493	2.93e-06	5.87e-05	4.1e-05	3458	tags=29%, list=17%, signal=25%	PSME2/CCNB1/CDC20/PSMB2/PTTG1/IFI27/CDK1/PSMA5/PSMB5/UBE2C/PBK/PSMA3/BUB1B/PSMD12/AURKB/LAMP3/CSNK1A1/PSME4/PSMA2/PSME1/NUDT15/MAD2L1/VCP/AURKA/PSMB6/KCTD5/PSMB10/TNFAIP1/PSMB3/PSMD6/PSMB8/PSMC4/PSMA4/HSPA5/FBXO6/FBXO45/KIF14/PLK2/HM13/PSMD2/MAEA/UBE2D3/TRIB2/UFD1/ELOB/UBE2S/ANAPC7/FBXO9/FBXW11/SEC61B/PSMD11/PSMD1/PSMD14/PSMC3/BCAP31/PSMB9/CCNF/CHFR/UCHL5/FOXRED2/SKP2/PSMA7/PSMD9/PSMD8/UBE2D1/UBX…
GOBP	RNA EXPORT FROM NUCLEUS	133	0.453009	1.87944	2.92e-06	5.87e-05	4.1e-05	4158	tags=44%, list=20%, signal=36%	RAN/EIF4A3/DDX39A/EIF4E/EIF6/HNRNPA2B1/NCBP1/SRSF9/NUP37/NUP210/CPSF6/NUP88/NUP62CL/CPSF3/ALYREF/MAGOHB/ABCE1/NUP50/XPOT/NOL6/SARNP/NSUN2/SRSF2/NXT1/NPM1/POLR2D/RAE1/XPO5/SRSF7/SEC13/SRSF1/THOC5/IWS1/NRDE2/NUP155/THOC6/THOC7/NDC1/CPSF4/GLE1/MAGOH/NUP188/DDX19A/RRS1/RIOK2/WDR33/NUP85/FYTTD1/CHTOP/NUP205/EIF5A/AGFG1/UPF1/ENY2/NUP58/NUP107/NUP93/SRSF3/POM121
GOMF	CXCR CHEMOKINE RECEPTOR BINDING	18	0.779784	2.21134	2.9e-06	5.85e-05	4.08e-05	2232	tags=61%, list=11%, signal=55%	CXCL1/CXCL13/CXCL2/YARS1/CXCL10/CXCL8/CXCL9/CXCL3/ITCH/CXCL6/CXCL11
GOBP	DOUBLE STRAND BREAK REPAIR VIA BREAK INDUCED REPLICATION	12	0.854404	2.16584	2.88e-06	5.83e-05	4.07e-05	1949	tags=75%, list=9%, signal=68%	MCM6/GINS2/MCM4/CDC45/MCM5/MCM2/MCM7/MCM3/CDC7
GOBP	REGULATION OF STEM CELL DIFFERENTIATION	107	0.486253	1.95739	2.86e-06	5.8e-05	4.05e-05	3450	tags=43%, list=17%, signal=36%	PSME2/PSMB2/PSMA5/PSMB5/PSMA3/PSMD12/PSME4/PSMA2/PSME1/PSMB6/PSMB10/PSMB3/PSMD6/PSMB8/PSMC4/PSMA4/PSMD2/HSPA9/PSMD11/PSMD1/PSMD14/PSMC3/PSMB9/PSMA7/PSMD9/PSMD8/CBFB/PSMA1/PSMD13/PSMF1/PSMC5/NSUN2/PSMC2/PSMB1/PSMC6/ITCH/PSME3/PRKDC/PSMD7/PSMC1/PUS7/OCIAD2/PSMB7/PSMD10/TCF3/YTHDF2
GOBP	RESPONSE TO FUNGUS	45	0.618358	2.14319	2.72e-06	5.54e-05	3.87e-05	1730	tags=36%, list=8%, signal=33%	S100A12/S100A9/C10orf99/LTF/S100A8/CLEC7A/MYD88/IL36RN/BAK1/ARG1/GAPDH/GNLY/COTL1/ATG5/SYK/RNASE7
GOBP	METANEPHRIC NEPHRON DEVELOPMENT	39	-0.610219	-2.19921	2.71e-06	5.53e-05	3.86e-05	3438	tags=49%, list=16%, signal=41%	LGR4/BMP4/HES1/PDGFRB/IRX2/ADIPOQ/SOX8/FMN1/LIF/GREM1/LAMB2/PKD2/CD34/FOXD1/TFAP2B/OSR1/PKD1/IRX1/PDGFRA
GOCC	PRERIBOSOME LARGE SUBUNIT PRECURSOR	23	0.73966	2.19534	2.66e-06	5.44e-05	3.8e-05	2371	tags=57%, list=11%, signal=50%	WDR12/EIF6/NIP7/MRTO4/EBNA1BP2/PPAN/RRP1/RRP15/BOP1/WDR74/NOC2L/FBXW9/PES1
GOMF	TRANSMEMBRANE RECEPTOR PROTEIN KINASE ACTIVITY	79	-0.493218	-2.0378	2.64e-06	5.42e-05	3.78e-05	4635	tags=49%, list=22%, signal=39%	DDR1/FGFRL1/TEK/CRIM1/KDR/ACVR2B/NRP1/EFNA3/FGFR3/EFNB3/ACVR1C/ERBB3/ERBB4/PDGFRB/MERTK/DDR2/INSR/IGF1R/EPHB6/MET/EGFR/ACVRL1/PDGFRL/LTBP4/FGFR2/EFNA4/NTRK2/BMPR1A/FGFR1/ROR2/BMPR1B/TGFBR2/EPHB1/EFEMP1/ACVR1B/AXL/PDGFRA/KIT/TGFBR3
GOCC	ACTIN CYTOSKELETON	488	-0.292388	-1.52911	2.41e-06	4.96e-05	3.47e-05	3288	tags=28%, list=16%, signal=24%	VCL/CCDC102A/SH3PXD2B/CGN/MYRIP/KLHL20/CTTNBP2/SEPTIN2/CLIC4/PXN/ABL1/KRT19/MICAL1/PARVB/ANKRD23/WASF2/ABCB4/TLN2/AFAP1L1/FAM107A/LASP1/DDR2/PDLIM5/ABLIM1/AMOT/SWAP70/MYL9/MACF1/MYOT/AMPH/ROR1/RAB22A/CLIC5/AUTS2/RAPGEF3/SH3PXD2A/RHOQ/ADD1/NEXN/ACTC1/LSP1/FMN1/EEF1A1/TMOD2/PARVA/DYNLL2/ACTA1/CLDN5/CTNNA1/MYH3/FER/PLEKHH2/TNNC2/FILIP1/DSTN/EPB41L2/EHBP1/BIN1/VILL/PTK2/MTSS1/ARHGAP35/TTC17/NEURL1B/S…
GOBP	NEGATIVE REGULATION OF APOPTOTIC SIGNALING PATHWAY	213	0.401804	1.76322	2.36e-06	4.87e-05	3.4e-05	4159	tags=36%, list=20%, signal=29%	ENO1/PPIF/SLC25A5/PRELID1/GHITM/HDAC1/IFI6/GSTP1/HIF1A/NDUFA13/IL19/MMP9/CFLAR/VNN1/TNFSF10/PPIA/DDIAS/NDUFS3/VDAC2/TRAP1/MIF/IL1B/FIGNL1/BID/FAIM/HMOX1/BCL2L12/GPX1/SOD2/CSNK2A1/PIH1D1/HYOU1/GCLM/GNAI3/CAAP1/ARMC10/TNFRSF10A/NOC2L/PLAUR/PSME3/CASP8/TNFRSF10B/FADD/SIAH2/BDKRB2/TMEM14A/BOK/TRIAP1/HMGB2/PARK7/BRCA1/TNF/TMEM161A/FASLG/RB1/BAX/ING2/FXN/HTRA2/MDM2/PSMD10/TRADD/ICAM1/ITPRIP/NLE1/UNC5B/…
GOBP	LEUKOCYTE MIGRATION	434	0.3417	1.59419	2.35e-06	4.87e-05	3.4e-05	4673	tags=35%, list=22%, signal=28%	S100A12/S100A9/CXCR2/C10orf99/WNT5A/NOD2/S100A8/CCL20/CXCR4/SLC7A11/C1QBP/MYD88/S100A7/PYCARD/CCR7/CXCL1/CXCL13/PTAFR/CXCL2/CYP7B1/SLC16A1/ATP1B3/MMP9/SMPD3/CXCL16/PPIA/CXCL10/LCK/CXCL8/CCL18/CCL4/SELL/CCL22/ADAM17/CXCL9/S100A14/SLC7A5/CD2/CH25H/AIMP1/RHOH/MIF/CCL2/LYN/CORO1A/MMP1/HMOX1/CD48/SLAMF8/SHC1/SPNS2/DEFB124/HCK/CD177/CCL8/SYK/SELE/RAC2/IL6/SLC3A2/ITGA4/RIPK3/LGALS9/CCL7/CCL19/CCR5/ITGB2…
GOBP	REGULATION OF VIRAL GENOME REPLICATION	79	0.524413	2.00571	2.24e-06	4.66e-05	3.26e-05	4699	tags=52%, list=23%, signal=40%	LTF/IFI16/OAS2/OASL/OAS1/MX1/ISG20/SLPI/ISG15/PLSCR1/APOBEC3B/RSAD2/PPIA/CXCL8/TOP2A/OAS3/IFIT1/TARBP2/IFITM1/PPIH/PDE12/IFIT5/IFITM3/SHFL/ADAR/SRPK1/TNIP1/LARP1/BST2/CCL5/TNF/IFITM2/PARP10/TMEM39B/FKBP6/RESF1/EIF2AK2/PROX1/CD28/APOBEC3C/ZC3HAV1
GOBP	INTERLEUKIN 12 PRODUCTION	58	0.584353	2.11904	2.23e-06	4.64e-05	3.24e-05	3991	tags=50%, list=19%, signal=41%	NOD2/CLEC7A/C1QBP/CCR7/IDO1/IRF1/TLR2/LTB/IRF8/JAK3/IFNG/NFKB1/IL12B/TIGIT/SYK/CD36/LGALS9/CCL19/IL23A/LAPTM5/SLAMF1/HSPD1/TLR8/IRAK3/HLA-B/LILRB1/HLA-G/IL10/MAPK14
GOMF	SINGLE STRANDED DNA BINDING	112	0.470478	1.9089	2.17e-06	4.54e-05	3.17e-05	3666	tags=44%, list=18%, signal=36%	SUB1/NME1/MCM6/NABP1/MCM10/TOP1/POLR2H/RPA3/RAD51/MCM4/CDC45/HNRNPA2B1/TDP2/MCM5/TDP1/MCM2/STN1/RAD51AP1/SHOC1/SSBP1/SMC2/MCM7/SMC4/MCM3/BLM/SWSAP1/BRCA2/POLR2G/NEIL3/HMCES/POLR2D/TWNK/RAD18/HMGB2/HSPD1/SMC6/LONP1/RNF138/ERCC1/TOP3A/MSH3/APTX/ANXA1/MCM9/SAMHD1/PURB/NABP2/REXO4/RAD50
GOBP	KERATINIZATION	139	0.450543	1.87402	2.11e-06	4.43e-05	3.09e-05	2538	tags=24%, list=12%, signal=21%	KRT16/DSC2/PI3/KRT6A/KLK13/DSG3/LCE3D/TGM1/SPRR1B/CDH3/SPRR3/KRT6B/CERS3/CNFN/SPRR1A/IVL/ABCA12/TGM3/KRT17/TMEM79/ST14/CSTA/SPRR2G/SFN/CAPN1/PRSS8/KLK12/PCSK6/KRT24/KRT78/PKP3/KRT37/FURIN
GOCC	CMG COMPLEX	10	0.88935	2.1477	2.08e-06	4.39e-05	3.07e-05	1658	tags=90%, list=8%, signal=83%	GINS3/MCM6/GINS2/MCM4/GINS1/MCM5/MCM2/MCM7/MCM3
GOBP	HEMATOPOIETIC PROGENITOR CELL DIFFERENTIATION	157	0.436957	1.85461	2.05e-06	4.33e-05	3.03e-05	3496	tags=39%, list=17%, signal=33%	PSME2/PSMB2/PSMA5/PSMB5/PSMA3/PSMD12/PSME4/PSMA2/PSME1/PSMB6/PSMB10/PSMB3/PSMD6/PSMB8/PSMC4/PSMA4/SMPD3/PSMD2/TOP2A/HSPA9/PSMD11/PSMD1/PSMD14/PSMC3/PSMB9/PSMA7/PSMD9/PSMD8/CBFB/PSMA1/RBM47/PSMD13/XRCC5/PSMF1/AP3B1/BATF/PSMC5/PSMC2/PSMB1/PSMC6/ADAR/ITCH/PSME3/PRKDC/PLEK/PSMD7/ESCO2/DHTKD1/PSMC1/PUS7/LIG4/EXT1/AGPAT5/OCIAD2/PSMB7/PSMD10/ARMC6/TCF3/TNFRSF13B/YTHDF2/PDCD2
GOBP	NEUTROPHIL MIGRATION	113	0.477692	1.94212	1.88e-06	3.99e-05	2.79e-05	4673	tags=47%, list=22%, signal=37%	S100A12/S100A9/CXCR2/NOD2/S100A8/CCL20/C1QBP/MYD88/CCR7/CXCL1/CXCL13/CXCL2/PPIA/CXCL10/CXCL8/CCL18/CCL4/CCL22/CXCL9/RHOH/CCL2/SLAMF8/CD177/CCL8/SYK/RAC2/CCL7/CCL19/ITGB2/IL23A/CXCL3/CXCL6/CXCL11/ADAM8/PIK3CD/RHOG/CCL5/XCL1/PPIB/SRP54/MCOLN2/WDR1/CCL17/JAML/IRAK4/VAV1/CKLF/CSF3R/C5AR2/C3AR1/CXCR1/CXCL5/FCER1G
GOCC	SMALL SUBUNIT PROCESSOME	38	0.645666	2.16265	1.84e-06	3.91e-05	2.73e-05	3675	tags=61%, list=18%, signal=50%	UTP11/DCAF13/IMP4/SNU13/NOL10/NOP58/UTP14A/NOP56/WDR46/NOL6/XRCC5/EMG1/UTP4/NOC4L/NOP14/RRP9/PRKDC/UTP6/PDCD11/TBL3/WDR3/HEATR1/UTP3
GOBP	NEURON MIGRATION	139	-0.412803	-1.8632	1.81e-06	3.87e-05	2.7e-05	4590	tags=40%, list=22%, signal=31%	DAB2IP/SHTN1/USP9X/SEMA3A/ASTN1/FLRT2/ULK4/IGSF10/DNER/LRIG2/LHX6/PHACTR1/ARHGEF2/NRP1/TNN/SPOCK1/RELN/ERBB4/ZNF609/ELP3/CXCL12/NRG3/GNRH1/SH3RF1/FZD3/POMGNT2/AUTS2/SEMA6A/TWIST1/FGF13/NDN/DCLK1/GFRA3/GAS6/NTRK2/ADGRL3/NR2F2/FGFR1/ZMIZ1/MEF2C/NTN1/PCM1/SATB2/PRKG1/NDNF/NEXMIF/RAPGEF2/GATA2/PAFAH1B1/FYN/AXL/FBXO31/SRGAP2/MAP1B/GATA3
GOBP	KERATINOCYTE DIFFERENTIATION	213	0.404332	1.77431	1.81e-06	3.87e-05	2.7e-05	3354	tags=29%, list=16%, signal=25%	KRT16/DSC2/PI3/KRT6A/KLK13/DSG3/SERPINB13/LCE3D/TGM1/SPRR1B/CDH3/WNT5A/EPHA2/SPRR3/KRT6B/CERS3/CNFN/S100A7/SPRR1A/IVL/MACROH2A1/ABCA12/PRKCH/TGM3/KRT17/TMEM79/ST14/CSTA/TRIM16/ZBED2/IL20/SPRR2G/BCR/SFN/CTSL/CYP27B1/CBFB/CAPN1/PRSS8/KLK12/PCSK6/OVOL2/KRT24/ZFP36/EREG/ETV4/KRT78/PKP3/GRHL1/TP63/AQP3/KRT37/FURIN/MACROH2A2/PLAAT4/ADAM9/RPTN/UGCG/ANXA1/CASP3/KRT14/OPN3
GOBP	EPITHELIAL TUBE MORPHOGENESIS	302	-0.332047	-1.64792	1.8e-06	3.86e-05	2.69e-05	5366	tags=43%, list=26%, signal=32%	MED12/PAK1/CSF1R/SFRP2/HESX1/DLL1/HOXA5/CEP290/TSC2/TEAD2/SMAD4/HOXB7/IRX3/FOXA1/OPA1/KIF26B/CTHRC1/SEMA4C/FAT4/WNT6/RPS7/WNT11/DDR1/CTSH/DVL1/MED1/PRKACB/LRP5L/KDR/DVL3/SETDB2/CTNNB1/BBS7/KAT2A/TGFB2/LRP5/BMP2/C2CD3/PRKD2/TACSTD2/BTRC/FOXC2/MIB1/NRP1/LGR4/PLXND1/IFT172/IFT52/FGF1/SETD2/KLHL3/PRICKLE1/TCTN1/CLIC4/DLG1/ABL1/BMP4/HES1/IRX2/AGT/AHI1/TBX3/LMO4/SOX4/SEMA3E/YAP1/EDN1/SLIT2/STK3/NOG/DVL…
GOBP	VITAMIN METABOLIC PROCESS	123	0.472551	1.94971	1.76e-06	3.78e-05	2.64e-05	4720	tags=49%, list=23%, signal=38%	TCN1/PPARD/ABCC1/VNN3/RDH10/GSTO1/PNPO/ACP3/PRSS3/SLC23A2/VNN1/SHMT2/PDZD11/MTHFD1/MTHFD2/CYP27B1/IFNG/SLC5A6/SLC2A1/NFKB1/MTRR/CYP24A1/CBR1/SLC52A2/MTHFD1L/MMADHC/DHFR/VKORC1/FLAD1/SLC2A3/MMAB/RBP1/PCCB/SLC25A19/SLC19A1/TNF/MMAA/PSAT1/MCCC2/PC/SLC23A1/RFK/LGMN/ACP5/CYP2R1/SLC25A32/MTHFR/PANK2/RLBP1/PCCA/MCCC1/CYP4F11/AASDHPPT/CYP4F2/VNN2/AMN/MMACHC/PLTP/SLC19A3/MTHFD2L
GOMF	SNORNA BINDING	32	0.67651	2.18393	1.71e-06	3.69e-05	2.58e-05	3083	tags=69%, list=15%, signal=59%	ISG20/TSR1/NHP2/NOP10/BYSL/IMP4/SNU13/NUDT5/NOP58/NOP56/NOLC1/XRCC5/NOP14/NUDT1/RRP9/PRKDC/GAR1/UTP6/DKC1/DDX21/TBL3/WDR3
GOBP	POSITIVE REGULATION OF PROTEOLYSIS	351	0.35603	1.63226	1.69e-06	3.66e-05	2.56e-05	3351	tags=32%, list=16%, signal=27%	SERPINB3/S100A9/ZC3H12A/CYCS/PSME2/SOX7/ENO1/CDC20/S100A8/IFI16/CTSC/PRELID1/CLEC7A/FAM162A/CSNK1A1/PYCARD/PSME4/PSME1/PLGRKT/VCP/AURKA/F12/CASP1/BAK1/PSMC4/CLPX/NDUFA13/AKIRIN2/PRSS22/PLK2/CFLAR/TNFSF10/TIMM17A/AURKAIP1/LCK/STAT3/TRIB2/ELOB/AIM2/PSENEN/AIFM1/FBXW11/PSMD14/IFNG/PSMC3/BCAP31/CHFR/IL1B/HSPE1/MYC/LYN/XDH/BID/CASP10/PDCD5/RBX1/PLK1/SYK/PDCD6/PLK3/ST20/LGALS9/PSMC2/CTSD/TNFRSF10A/ADRM…
GOBP	MEIOTIC CELL CYCLE	238	0.395644	1.75693	1.68e-06	3.66e-05	2.56e-05	4499	tags=33%, list=22%, signal=26%	CDC20/PTTG1/WNT5A/CCNB2/H2AX/BUB1B/CKS2/NEK2/AURKA/TTK/CCNE1/BUB1/TUBG1/PPP2CA/HUS1/RAD51/TRIP13/CCNE2/CDC25B/CENPX/NUF2/PTTG3P/TOP2A/CDC25A/RAD51AP1/SHOC1/ACTR3/EXO1/CHFR/ESPL1/BRIP1/SMC2/SIRT7/FIGNL1/KIF18A/MND1/PLK1/FANCD2/SMC4/CENPS/PSMD13/BRCA2/NSUN2/PKMYT1/OVOL1/EREG/FBXO5/RAD54L/SGO2/WASHC5/RAD54B/NCAPD2/CDK2/CDC25C/MYH9/NDC1/ING2/ERCC1/TOP3A/MSH3/EME1/TUBG2/YTHDF2/SYCE3/TDRKH/RAD50/REC8/B…
[truncated: 308 more rows]
