# Supplementary material for: Exploration of biomarkers of psoriasis through combined multiomics analysis
Source: Research Square preprint supplement (doi:10.21203/rs.3.rs-1507834/v1), 2022-04-06
Supplement: Supplementary file 2 [file 3799e3a2bbb91e00b5bc6f6c.xlsx]

## Sheet: KEGG_result
ID	Description	GeneRatio	BgRatio	pvalue	p.adjust	qvalue	geneID	Count
hsa03320	PPAR signaling pathway	18/369	75/8104	4.1348e-09	1.22804e-06	1.10116e-06	ACSBG1/FABP7/FADS2/SCD5/SORBS1/ADIPOQ/HMGCS2/ACADL/PLIN1/ACOX2/LPL/SLC27A4/PPARD/CD36/ANGPTL4/GK/FABP5/MMP1	18
hsa04061	Viral protein interaction with cytokine and cytokine receptor	20/369	100/8104	1.65562e-08	2.4586e-06	2.20459e-06	CCL27/IL37/ACKR4/CCL19/CXCL11/IL20/CCL22/CCL2/CCR7/IL19/CXCL2/CXCR4/CXCR2/CXCL1/CXCL9/CXCL13/CXCL8/CCL18/CXCL10/CCL20	20
hsa04657	IL-17 signaling pathway	16/369	94/8104	4.36709e-06	0.000432341	0.000387675	FOS/IL17D/FOSL1/CCL2/MMP9/MMP1/CXCL2/CXCL1/CXCL8/CXCL10/CCL20/S100A8/LCN2/S100A7/S100A9/S100A7A	16
hsa04060	Cytokine-cytokine receptor interaction	30/369	295/8104	2.76331e-05	0.00205176	0.00183978	CCL27/IL37/LEPR/PRLR/ACKR4/IL17D/CCL19/LTB/CXCL11/IL20/IL4R/CCL22/TNFRSF21/CCL2/IL7R/CCR7/IL19/CXCL2/IL36A/CXCR4/CXCR2/CXCL1/CXCL9/CXCL13/CXCL8/CCL18/IL36RN/CXCL10/CCL20/IL36G	30
hsa00240	Pyrimidine metabolism	10/369	56/8104	0.000184811	0.0109777	0.00984359	CTPS1/UCK2/NT5C3A/TYMS/TK1/PNP/CMPK2/UPP1/RRM2/TYMP	10
hsa05164	Influenza A	19/369	171/8104	0.000272424	0.013485	0.0120918	IRF9/MX2/PRSS2/CCL2/PYCARD/KPNA2/IFIH1/STAT1/TMPRSS4/SOCS3/PRSS3/OAS1/MX1/IRF7/RSAD2/CXCL8/CXCL10/OAS2/TMPRSS11D	19
hsa05160	Hepatitis C	17/369	157/8104	0.000762556	0.0323541	0.0290115	CLDN8/CLDN23/CLDN1/CCND1/IRF9/MX2/CLDN17/LDLR/STAT1/IFIT1/SOCS3/OAS1/MX1/IRF7/RSAD2/CXCL10/OAS2	17
hsa04062	Chemokine signaling pathway	19/369	192/8104	0.00115235	0.0427809	0.0383611	CCL27/PLCB4/ADCY2/CCL19/CXCL11/CCL22/CCL2/STAT1/CCR7/CXCL2/CXCR4/CXCR2/CXCL1/CXCL9/CXCL13/CXCL8/CCL18/CXCL10/CCL20	19
hsa05215	Prostate cancer	12/369	97/8104	0.00142999	0.0471897	0.0423143	AR/PDGFD/PDGFC/CREB5/TCF7L1/BCL2/CCND1/TGFA/CCNE2/CCNE1/MMP9/PLAT	12
