# Supplementary material for: Exploration of biomarkers of psoriasis through combined multiomics analysis
Source: Research Square preprint supplement (doi:10.21203/rs.3.rs-1507834/v1), 2022-04-06
Supplement: Supplementary file 3 [file 7ea26ff6e81333938617bca4.xlsx]

## Sheet: KEGG
ID	Description	setSize	enrichmentScore	NES	pvalue	p.adjust	qvalues	rank	leading_edge	core_enrichment
KEGG_ALZHEIMERS_DISEASE	KEGG_ALZHEIMERS_DISEASE	159	0.535913	2.27922	1e-10	3.72e-09	2.16842e-09	3701	tags=50%, list=18%, signal=41%	54205/27089/1340/7388/518/840/1349/522/4704/506/7386/9377/4710/516/1351/488/374291/4715/29796/10975/810/4701/6868/4716/4709/1537/4706/515/55851/4722/4726/6390/4708/2597/4729/3553/3028/4700/4694/637/1020/4713/823/4712/509/4728/1347/4697/4723/1337/7385/4702/4696/4714/539/102/841/51806/4695/8772/4717/4731/7132/1350/7384/3416/7124/1329/4720/6392/513/4707/498/836/4705/10476/23621/5331/4725
KEGG_HUNTINGTONS_DISEASE	KEGG_HUNTINGTONS_DISEASE	174	0.54218	2.32667	1e-10	3.72e-09	2.16842e-09	3949	tags=49%, list=19%, signal=40%	54205/292/1175/27089/1340/3065/7388/518/1349/5437/522/4704/506/7386/9377/4710/516/1351/374291/4715/5435/29796/10975/4701/4716/4709/1537/4706/515/4722/4726/6390/4708/7417/4729/4700/4694/4713/4712/2876/509/6648/4728/23186/1347/4697/5441/4723/1337/7385/4702/4696/4714/5436/539/841/5433/7416/4695/4717/4731/1350/5434/7384/3066/1329/1211/4720/6392/7419/513/581/4707/7019/498/836/4705/5438/10476/3064/5331…
KEGG_OXIDATIVE_PHOSPHORYLATION	KEGG_OXIDATIVE_PHOSPHORYLATION	122	0.67047	2.7616	1e-10	3.72e-09	2.16842e-09	3154	tags=61%, list=15%, signal=52%	479/9551/27089/1340/7388/518/9114/1349/526/522/4704/506/7386/9377/4710/516/1351/9550/533/374291/4715/29796/10975/4701/4716/4709/1537/4706/9296/515/4722/4726/6390/4708/126328/27068/4729/521/5464/4700/4694/4713/4712/10632/509/4728/51382/1347/4697/528/245973/4723/1337/1352/7385/4702/4696/4714/539/51606/523/4695/4717/10063/4731/8992/1350/7384/1329/4720/6392/513/4707/498
KEGG_PARKINSONS_DISEASE	KEGG_PARKINSONS_DISEASE	118	0.613229	2.50729	1e-10	3.72e-09	2.16842e-09	4183	tags=64%, list=20%, signal=52%	54205/292/9246/27089/1340/7388/518/1349/522/4704/506/7332/7386/9377/4710/516/1351/374291/4715/29796/10975/4701/4716/4709/1537/4706/515/4722/4726/6390/4708/7417/4729/4700/4694/4713/4712/509/4728/1347/4697/4723/1337/7385/4702/4696/4714/539/7416/7326/4695/4717/4731/11315/1350/118424/7384/2861/1329/4720/6392/7419/513/4707/27429/498/836/4705/10476/4725/7318/1327/170712/4719/51465/1345
KEGG_PROTEASOME	KEGG_PROTEASOME	42	0.841639	2.87203	1e-10	3.72e-09	2.16842e-09	2337	tags=88%, list=11%, signal=78%	5721/5690/5686/5693/5684/5718/23198/5683/5720/5694/5699/51371/5691/9861/5696/5704/5685/5708/5717/5707/10213/3458/5702/5698/5688/5714/7979/5682/5719/9491/5705/5701/5689/5706/10197/5713/5700
KEGG_RIBOSOME	KEGG_RIBOSOME	83	-0.57979	-2.37278	5.27209e-10	1.59874e-08	9.31921e-09	3936	tags=73%, list=19%, signal=60%	6159/6188/6170/6227/51187/6204/6207/140801/6206/6201/6222/6143/11224/6168/6152/6205/6193/6203/6171/6147/6230/6210/6209/23521/6161/6130/6232/6160/6141/6155/6202/6124/6136/6133/6194/6137/4736/6135/6167/9045/6191/6181/6176/6132/6218/6229/6146/6228/9349/51065/6169/6224/6122/6138/6164/6189/6125/6134/6129/6165/6156
KEGG_CELL_CYCLE	KEGG_CELL_CYCLE	123	0.540679	2.2208	6.01677e-10	1.59874e-08	9.31921e-09	3233	tags=49%, list=15%, signal=41%	891/991/9232/983/9133/7027/701/3065/4175/5111/4085/7272/898/699/990/890/4173/8318/10971/9134/994/4174/4171/2810/993/10926/51434/9700/4609/6502/23594/4176/1026/9978/4998/5347/4172/8317/9088/10459/894/5591/1871/8454/11200/1870/51529/7534/1022/5001/3066/1017/1029/995/5925/902/1647/4193/8697/5933
KEGG_PYRIMIDINE_METABOLISM	KEGG_PYRIMIDINE_METABOLISM	95	0.572606	2.26552	8.79669e-10	2.04523e-08	1.19218e-08	4978	tags=56%, list=24%, signal=43%	1890/6241/7378/7083/4860/10622/7371/4830/51251/5427/1503/7298/129607/5437/1841/7296/56655/5435/87178/22978/3704/54107/5425/51728/30834/6240/55703/7372/5441/9533/5436/23649/5433/84172/5557/661/5434/57804/1635/10714/5438/29922/790/25885/30833/5439/5424/124583/956/11128/246721/957/10201
KEGG_FOCAL_ADHESION	KEGG_FOCAL_ADHESION	197	-0.430776	-2.03509	1.77834e-09	3.67524e-08	2.14233e-08	4723	tags=44%, list=23%, signal=34%	23396/81/5170/5155/1291/5062/5602/1292/3791/1499/3696/5908/3672/3611/3685/5290/6654/5728/63923/3908/5906/7414/7424/5649/5829/6655/3678/53358/29780/5159/83660/7058/7059/22801/7423/10398/5578/3910/3480/5228/4233/5154/25759/55742/1950/1956/1101/5747/2909/5291/3679/3909/8516/3688/7148/3913/2335/2932/80310/10000/4659/5579/9475/10319/1793/10451/3915/673/5594/3918/5063/4638/2318/2534/3680/3911/5295/5156…
KEGG_TOLL_LIKE_RECEPTOR_SIGNALING_PATHWAY	KEGG_TOLL_LIKE_RECEPTOR_SIGNALING_PATHWAY	100	0.528554	2.1079	1.84842e-08	3.43805e-07	2.00407e-07	4902	tags=48%, list=23%, signal=37%	3665/6772/4615/5603/3627/3654/3576/6351/7097/4283/54472/4790/3553/9641/29110/3593/3569/7187/8517/5606/841/6373/8772/5293/5608/6416/5296/942/23643/51311/6352/7124/1326/1147/3455/5599/6696/5604/51135/941/1432/23533/7096/958/5605/5595/148022/3440
KEGG_CYTOSOLIC_DNA_SENSING_PATHWAY	KEGG_CYTOSOLIC_DNA_SENSING_PATHWAY	54	0.622626	2.23829	1.82807e-07	3.0911e-06	1.80183e-06	3414	tags=43%, list=16%, signal=36%	3665/10622/29108/834/3627/6351/9447/4790/3553/9641/29110/51728/55703/3569/11035/9533/103/8517/661/6352/23586/1147/4793
KEGG_ANTIGEN_PROCESSING_AND_PRESENTATION	KEGG_ANTIGEN_PROCESSING_AND_PRESENTATION	78	0.562478	2.1546	2.39606e-07	3.71389e-06	2.16486e-06	5639	tags=55%, list=27%, signal=40%	5721/3308/5720/1508/10437/3309/6890/1514/6891/3312/10197/3109/5993/1520/3112/3133/8625/6892/821/925/3824/3122/4261/567/3134/5641/3106/3135/4802/3809/3823/3111/2923/3108/3119/3440/3803/3105/3115/3107/115653/811/4049
KEGG_DNA_REPLICATION	KEGG_DNA_REPLICATION	36	0.676206	2.24053	6.93956e-07	9.92891e-06	5.78765e-06	3406	tags=64%, list=16%, signal=54%	5427/4175/5111/10535/6119/4173/4174/4171/2237/56655/6742/54107/5425/4176/5982/4172/1763/5983/23649/5557/57804/5984/10714
KEGG_RIG_I_LIKE_RECEPTOR_SIGNALING_PATHWAY	KEGG_RIG_I_LIKE_RECEPTOR_SIGNALING_PATHWAY	71	0.557618	2.09755	9.1027e-07	1.20936e-05	7.04946e-06	4902	tags=44%, list=23%, signal=34%	3665/79671/64135/9636/5603/3627/3576/4790/9641/9474/843/29110/3593/79132/7187/8517/841/8772/7124/23586/1147/8717/7706/4793/5599/1432/7186/64343/10010/338376/3440
KEGG_NOD_LIKE_RECEPTOR_SIGNALING_PATHWAY	KEGG_NOD_LIKE_RECEPTOR_SIGNALING_PATHWAY	62	0.574614	2.12559	1.12248e-06	1.39188e-05	8.11338e-06	3991	tags=52%, list=19%, signal=42%	64127/29108/2919/84674/2920/834/5603/3576/838/4790/3553/6347/330/6355/3569/6354/8517/260434/841/10910/6352/7124/64170/1147/4793/58484/59082/5599/9051/7205/114548/1432
KEGG_GRAFT_VERSUS_HOST_DISEASE	KEGG_GRAFT_VERSUS_HOST_DISEASE	34	0.680264	2.19923	2.06889e-06	2.40508e-05	1.40194e-05	5241	tags=74%, list=25%, signal=55%	3002/5551/3458/3553/3569/3109/3112/3133/942/7124/356/3824/3122/3134/3106/3135/941/940/3111/3108/3119/3803/3105/3115/3107
KEGG_AMINOACYL_TRNA_BIOSYNTHESIS	KEGG_AMINOACYL_TRNA_BIOSYNTHESIS	41	0.631889	2.15082	2.64707e-06	2.89621e-05	1.68823e-05	4072	tags=56%, list=20%, signal=45%	8565/7453/6897/2617/4141/3376/2193/5917/4677/54938/10056/92935/3035/7407/6301/51067/55157/123263/23395/2058/10667/5859/833
KEGG_ALLOGRAFT_REJECTION	KEGG_ALLOGRAFT_REJECTION	33	0.676437	2.18582	2.8597e-06	2.95502e-05	1.72251e-05	5241	tags=73%, list=25%, signal=55%	3002/5551/3458/3593/3109/3112/3133/942/7124/356/3122/3134/3106/3135/941/3586/940/3111/958/3108/3119/3105/3115/3107
KEGG_PRIMARY_IMMUNODEFICIENCY	KEGG_PRIMARY_IMMUNODEFICIENCY	35	0.655153	2.14898	3.84793e-06	3.76692e-05	2.19577e-05	4734	tags=57%, list=23%, signal=44%	29760/6890/3932/6891/3718/915/29851/3575/3561/8517/5993/8625/925/916/4261/23495/7535/5788/958/326
KEGG_PURINE_METABOLISM	KEGG_PURINE_METABOLISM	154	0.429509	1.81822	7.66184e-06	7.12551e-05	4.15353e-05	4978	tags=43%, list=24%, signal=33%	9615/6241/4860/10622/204/4830/51251/5427/5437/2618/56655/5435/353/87178/471/3614/22978/3251/272/3704/158/11164/7498/54107/5425/203/5151/51728/30834/132/6240/55703/5441/9533/5436/23649/5433/8833/84172/5147/5557/661/5434/57804/109/5315/9060/10714/5438/29922/51292/25885/5634/30833/5439/5424/5153/10606/124583/5150/956/11128/246721/957/5142/10201
KEGG_EPITHELIAL_CELL_SIGNALING_IN_HELICOBACTER_PYLORI_INFECTION	KEGG_EPITHELIAL_CELL_SIGNALING_IN_HELICOBACTER_PYLORI_INFECTION	68	0.521264	1.94788	1.12975e-05	0.000100063	5.83279e-05	3724	tags=43%, list=18%, signal=35%	3579/2919/9114/526/5603/1839/9550/533/3576/6868/9296/5336/4790/4067/1445/51382/528/245973/8517/102/51606/523/6416/8992/6352/1147/836/5599/23545
KEGG_SPLICEOSOME	KEGG_SPLICEOSOME	121	0.445031	1.82752	3.17362e-05	0.000268315	0.000156403	4922	tags=49%, list=24%, signal=37%	9775/51645/6637/6636/6632/4686/8683/3183/57819/8896/10907/23450/51690/6634/9343/83443/4809/10465/10189/6627/55110/6631/3312/51639/23658/25804/6628/6427/9716/26121/84950/6432/6426/10713/11157/4670/57461/9128/5356/10084/6626/4116/9410/6434/55119/6428/10285/10915/8559/1665/3190/10929/55660/27258/6633/9879/22827/10772/27339
KEGG_HOMOLOGOUS_RECOMBINATION	KEGG_HOMOLOGOUS_RECOMBINATION	28	0.667668	2.079	4.63554e-05	0.000372909	0.000217372	4287	tags=61%, list=21%, signal=48%	6119/5888/6742/5425/7979/641/675/8438/25788/57804/7156/146956/10714/10111/6117/5889/5424
KEGG_TYPE_I_DIABETES_MELLITUS	KEGG_TYPE_I_DIABETES_MELLITUS	39	0.60864	2.05557	4.81173e-05	0.000372909	0.000217372	5639	tags=72%, list=27%, signal=52%	3002/5551/3458/3553/3593/3109/3112/3133/942/3329/7124/356/3122/3134/2571/3106/3135/941/940/5798/3111/3108/3119/3105/3115/3107/3630/4049
KEGG_AXON_GUIDANCE	KEGG_AXON_GUIDANCE	129	-0.395172	-1.76091	5.33888e-05	0.000388048	0.000226197	3599	tags=37%, list=17%, signal=31%	64221/80031/8829/1944/1949/9901/25/6092/6387/59277/1946/9723/3983/25791/3897/9353/57715/2051/57556/4233/1942/7869/5532/6586/5747/4773/1945/3688/2932/9423/9475/5594/1073/1808/23365/5063/57522/2047/22885/5362/56920/2534/4772/2770/10725/1948/23380/63928
KEGG_ECM_RECEPTOR_INTERACTION	KEGG_ECM_RECEPTOR_INTERACTION	82	-0.452954	-1.84391	5.42433e-05	0.000388048	0.000226197	5463	tags=50%, list=26%, signal=37%	22987/3690/1289/7450/1278/50509/7060/1291/1292/3696/51206/3672/9899/3685/63923/3908/5649/3678/7058/7059/22801/3910/3339/1101/3679/3909/8516/3688/7148/3913/2335/1605/10319/3915/6385/3918/3680/3911/6383/3693/22798
KEGG_VASCULAR_SMOOTH_MUSCLE_CONTRACTION	KEGG_VASCULAR_SMOOTH_MUSCLE_CONTRACTION	108	-0.410988	-1.78119	6.21619e-05	0.000426953	0.000248875	4285	tags=42%, list=21%, signal=33%	5567/2983/552/10266/2776/5581/2768/4881/10672/805/8398/112/2778/3779/9138/4882/10398/23236/5578/4660/115/2977/94274/196883/2767/800/3778/4659/5579/5332/9475/148/5592/59/673/5594/23365/4638/3710/72/185/10335/4629/27345/108
KEGG_AUTOIMMUNE_THYROID_DISEASE	KEGG_AUTOIMMUNE_THYROID_DISEASE	48	0.561817	1.96651	6.42725e-05	0.000426953	0.000248875	6251	tags=54%, list=30%, signal=38%	3002/5551/3109/3112/3133/942/356/3122/3134/3106/3135/941/3586/940/3111/958/3108/3119/3440/3105/7253/3115/3107/1493/959/3567
KEGG_DILATED_CARDIOMYOPATHY	KEGG_DILATED_CARDIOMYOPATHY	89	-0.437124	-1.80605	7.08837e-05	0.000446633	0.000260346	4285	tags=40%, list=21%, signal=32%	5567/3696/7042/93589/3672/3685/3908/112/3678/2778/22801/783/70/115/153/6444/196883/6442/3679/8516/3688/6546/1605/5350/9254/7169/7134/1674/3680/6443/781/3693/1756/7168/6445/108
KEGG_CYTOKINE_CYTOKINE_RECEPTOR_INTERACTION	KEGG_CYTOKINE_CYTOKINE_RECEPTOR_INTERACTION	253	0.361646	1.60747	7.20375e-05	0.000446633	0.000260346	5947	tags=47%, list=29%, signal=34%	3579/6364/7852/3566/27242/1236/2919/10563/2920/9180/29949/3595/58191/8743/50604/3627/3459/10663/3576/6362/6351/6367/4283/4050/3458/55801/1438/3553/6347/3593/50615/1439/6355/8807/3575/3569/6354/6363/939/1234/11009/51561/2921/84957/51330/8797/3561/3559/6372/6373/8795/4055/7133/3597/8744/85480/7132/6352/7124/3460/356/6375/1230/9966/3594/50616/3455/729230/6361/23495/3600/7293/3587/58985/10673/3586/36…
KEGG_CITRATE_CYCLE_TCA_CYCLE	KEGG_CITRATE_CYCLE_TCA_CYCLE	29	0.632276	1.98122	0.000136444	0.000818666	0.000477207	5304	tags=69%, list=25%, signal=52%	3419/8802/4191/6390/3418/3420/50/2271/5106/4190/5162/6392/1737/1738/5091/55753/5160/8803/47/6391
KEGG_MELANOGENESIS	KEGG_MELANOGENESIS	98	-0.413627	-1.73149	0.00016705	0.000970979	0.000565992	5218	tags=50%, list=25%, signal=38%	10488/1638/2033/1910/817/148327/7475/4893/7481/434/1855/5567/1857/1499/2776/81029/90993/805/112/7477/4254/2778/8321/1906/23236/1856/5578/7976/11211/115/196883/8325/8324/1387/818/2932/64764/5579/5332/7472/5594/8322/4286/83439/2770/6934/3815/7482/108
KEGG_APOPTOSIS	KEGG_APOPTOSIS	87	0.457342	1.78754	0.000189985	0.00107083	0.000624194	3310	tags=37%, list=16%, signal=31%	54205/4615/3656/840/8837/8743/3654/9131/4790/3553/637/843/823/1439/330/2021/8797/8517/841/5576/8795/8772/5293/5296/7132/7124/356/581/1147/8717/836/11213
KEGG_SYSTEMIC_LUPUS_ERYTHEMATOSUS	KEGG_SYSTEMIC_LUPUS_ERYTHEMATOSUS	105	0.429382	1.71833	0.000206805	0.00113134	0.00065947	6944	tags=55%, list=33%, signal=37%	3014/9555/3015/6632/6634/3458/55766/6737/2215/6628/3109/717/713/3112/8345/942/55506/8357/8331/7124/3122/8335/714/8329/941/3586/8346/8968/940/85236/8355/8360/3111/8332/8294/8340/958/3108/3119/2904/715/8344/8366/3115/8367/712/8343/8342/8358/959/8359/8354/8348/8350/735/286436/733/8352
KEGG_RNA_POLYMERASE	KEGG_RNA_POLYMERASE	29	0.618814	1.93904	0.000308279	0.00159983	0.000932556	4846	tags=62%, list=23%, signal=48%	10622/5437/5435/51728/30834/55703/5441/9533/5436/5433/84172/661/5434/5438/25885/5439/11128/246721
KEGG_P53_SIGNALING_PATHWAY	KEGG_P53_SIGNALING_PATHWAY	68	0.474132	1.77175	0.000309645	0.00159983	0.000932556	4041	tags=47%, list=19%, signal=38%	54205/891/6241/983/9133/898/9134/3732/2810/9540/637/1026/3486/83667/894/841/11200/8795/1017/1029/581/55240/1647/4193/836/51246/9538/896/1019/5054/63970/545
KEGG_BASAL_CELL_CARCINOMA	KEGG_BASAL_CELL_CARCINOMA	53	-0.4836	-1.83878	0.000374135	0.0018331	0.00106853	4754	tags=49%, list=23%, signal=38%	7475/7481/1855/1857/1499/650/324/81029/652/7477/8321/1856/7976/11211/8325/8324/2932/7472/8322/5727/83439/6934/2736/2737/7482/8313
KEGG_UBIQUITIN_MEDIATED_PROTEOLYSIS	KEGG_UBIQUITIN_MEDIATED_PROTEOLYSIS	132	0.403287	1.66139	0.000374503	0.0018331	0.00106853	4118	tags=39%, list=20%, signal=31%	140739/991/11065/9246/7334/9021/9320/7332/389898/7323/6921/6923/27338/51434/23291/6502/8651/7321/23624/9978/330/7319/10055/9040/83737/9690/8454/7326/51529/4281/9616/7322/9063/672/118424/26272/9817/1161/5371/55236/4193/8697/26091/7324/7329/55284/7318/7325/997/65264/51465
KEGG_LEISHMANIA_INFECTION	KEGG_LEISHMANIA_INFECTION	67	0.476925	1.78232	0.000390885	0.00186422	0.00108667	4874	tags=48%, list=23%, signal=37%	6772/4615/5603/3654/3459/7097/3458/4790/3553/4843/3593/2215/3676/3689/3109/4688/3112/1535/7124/3460/65108/3122/4793/51135/3586/1432/2002/1378/3111/3108/5595/3119
KEGG_REGULATION_OF_ACTIN_CYTOSKELETON	KEGG_REGULATION_OF_ACTIN_CYTOSKELETON	210	-0.314572	-1.49439	0.000425585	0.00197897	0.00115356	3872	tags=33%, list=19%, signal=27%	3672/324/5305/3685/5290/6654/1128/5962/200576/7414/2261/8395/2768/26230/10672/2246/5829/6655/3678/5159/10163/9138/7114/22801/10398/22808/2149/9459/5154/2254/2258/1950/1956/6237/5747/2909/5291/3679/2263/5217/8516/3688/2335/2260/80310/4659/8826/9475/55970/85477/1793/10451/1730/10152/673/5594/79784/1073/23365/8396/5063/4638/3680/4628/5295/5156/3693/8874/2934/56034
KEGG_FRUCTOSE_AND_MANNOSE_METABOLISM	KEGG_FRUCTOSE_AND_MANNOSE_METABOLISM	34	0.588443	1.90238	0.000527809	0.00239445	0.00139575	3454	tags=44%, list=17%, signal=37%	57016/7167/3099/29925/7264/226/5373/4351/8898/5208/29085/5214/5210/29926/8776
KEGG_DRUG_METABOLISM_OTHER_ENZYMES	KEGG_DRUG_METABOLISM_OTHER_ENZYMES	39	0.553645	1.86983	0.000621344	0.00275167	0.00160397	3336	tags=36%, list=16%, signal=30%	1890/7378/7083/7371/3614/3251/3704/7498/9/7372/7172/8833/54576/1551
KEGG_GLYCOLYSIS_GLUCONEOGENESIS	KEGG_GLYCOLYSIS_GLUCONEOGENESIS	61	0.470711	1.7375	0.000863134	0.0036872	0.0021493	4356	tags=46%, list=21%, signal=36%	2023/7167/5223/5230/55276/501/3099/220/3939/226/131/2597/217/2821/222/5106/218/5214/5162/5315/1737/1738/2538/2027/5232/5160/3945/3101
KEGG_HYPERTROPHIC_CARDIOMYOPATHY_HCM	KEGG_HYPERTROPHIC_CARDIOMYOPATHY_HCM	82	-0.407534	-1.65901	0.000872241	0.0036872	0.0021493	4107	tags=38%, list=20%, signal=30%	3696/7042/93589/3672/3685/3908/3678/22801/783/70/51422/6444/6442/3679/8516/3688/5563/6546/1605/9254/7169/5565/7134/1674/3680/6443/781/3693/1756/7168/6445
KEGG_ARRHYTHMOGENIC_RIGHT_VENTRICULAR_CARDIOMYOPATHY_ARVC	KEGG_ARRHYTHMOGENIC_RIGHT_VENTRICULAR_CARDIOMYOPATHY_ARVC	73	-0.424414	-1.69603	0.00118144	0.00488327	0.0028465	4184	tags=40%, list=20%, signal=32%	1499/3696/93589/3672/3685/3908/3678/22801/783/6444/1495/1829/6442/1832/3679/8516/3688/6546/1605/9254/83439/1674/3680/6443/781/3693/1756/6934/6445
KEGG_BASE_EXCISION_REPAIR	KEGG_BASE_EXCISION_REPAIR	33	0.556542	1.79839	0.00140871	0.00569607	0.00332029	5052	tags=61%, list=24%, signal=46%	5427/5111/5423/2237/56655/6996/27301/54107/5425/23583/55247/57804/142/4350/10714/10039/5424/4913/3978/328
KEGG_WNT_SIGNALING_PATHWAY	KEGG_WNT_SIGNALING_PATHWAY	146	-0.340018	-1.54258	0.00150747	0.00594132	0.00346325	4809	tags=40%, list=23%, signal=31%	817/57680/7475/7481/5602/6500/5533/1855/5528/5567/1857/1499/23002/4041/324/8945/5516/81029/6425/144165/7477/8321/1459/85407/23236/1856/5578/7976/22943/11211/8325/8324/5532/1387/27101/4773/4040/818/2932/27123/5579/5332/7472/9475/4088/8322/23500/83439/5527/4772/6934/56998/79718/10725/7482/8313/11197/595/63928
KEGG_MISMATCH_REPAIR	KEGG_MISMATCH_REPAIR	22	0.635758	1.86491	0.00153324	0.00594132	0.00346325	5452	tags=73%, list=26%, signal=54%	5111/6119/6742/9156/5425/5982/5983/57804/4437/5984/10714/6117/5424/5985/3978/4292
KEGG_VIBRIO_CHOLERAE_INFECTION	KEGG_VIBRIO_CHOLERAE_INFECTION	54	0.488259	1.75525	0.00165518	0.00628294	0.00366238	2893	tags=37%, list=14%, signal=32%	9114/23480/526/9550/533/30001/9414/9296/5336/10952/51382/528/245973/11014/9601/29927/51606/523/8992/109
KEGG_CARDIAC_MUSCLE_CONTRACTION	KEGG_CARDIAC_MUSCLE_CONTRACTION	75	0.426873	1.62657	0.00182568	0.00670687	0.00390949	2958	tags=32%, list=14%, signal=28%	27089/1340/7388/1349/483/7386/9377/1351/488/29796/10975/1537/55799/785/1347/7170/1337/7385/481/7171/1350/7384/1329/476
KEGG_CIRCADIAN_RHYTHM_MAMMAL	KEGG_CIRCADIAN_RHYTHM_MAMMAL	11	-0.735401	-1.90064	0.00185695	0.00670687	0.00390949	3056	tags=91%, list=15%, signal=78%	1407/4862/8863/406/8864/9575/1453/5187/79365/1408
KEGG_NATURAL_KILLER_CELL_MEDIATED_CYTOTOXICITY	KEGG_NATURAL_KILLER_CELL_MEDIATED_CYTOTOXICITY	128	0.383349	1.58163	0.00187504	0.00670687	0.00390949	5241	tags=45%, list=25%, signal=34%	3002/80328/8743/3932/3459/5336/5551/3458/637/135250/919/962/2215/6464/6850/5880/3689/4068/8797/3265/3683/8795/3133/5293/3937/259197/5296/7124/3460/4277/356/3824/3383/836/7305/3455/51744/3106/7535/3135/9436/5604/7409/23533/7410/3809/27040/3823/2207/5605/5595/2885/3440/3803/3105/80329/10870/3107
KEGG_GAP_JUNCTION	KEGG_GAP_JUNCTION	88	-0.367523	-1.5102	0.00324074	0.0113732	0.00662952	3734	tags=44%, list=18%, signal=37%	3709/3356/3708/4893/5155/5567/2983/2776/6654/5607/6655/112/5159/2778/5593/23236/5578/10746/115/153/5154/1950/2977/1956/196883/1453/2767/80310/5579/5332/5592/5594/3710/1902/2770/5156/7846/108/56034
KEGG_ADHERENS_JUNCTION	KEGG_ADHERENS_JUNCTION	72	-0.39558	-1.59612	0.00437448	0.0150676	0.00878307	3430	tags=33%, list=16%, signal=28%	25945/7414/10163/1459/3643/5797/3480/4233/10810/1495/1956/2241/1387/2260/5792/8826/4088/5594/7048/83439/2534/56288/6934/10580
KEGG_RNA_DEGRADATION	KEGG_RNA_DEGRADATION	57	0.455682	1.66288	0.00467293	0.015803	0.00921172	3878	tags=42%, list=19%, signal=34%	2023/10200/54512/87178/3313/57819/51690/51010/27257/22894/23658/51013/25804/23019/23404/3329/56915/11157/6499/22803/57472/11340/2027/28960
KEGG_FOLATE_BIOSYNTHESIS	KEGG_FOLATE_BIOSYNTHESIS	11	0.710972	1.74996	0.00503549	0.016725	0.00974916	2171	tags=45%, list=10%, signal=41%	2643/5805/8836/1719/249
KEGG_INTESTINAL_IMMUNE_NETWORK_FOR_IGA_PRODUCTION	KEGG_INTESTINAL_IMMUNE_NETWORK_FOR_IGA_PRODUCTION	44	0.480399	1.6513	0.00521749	0.0168986	0.00985037	5211	tags=50%, list=25%, signal=38%	7852/29851/3569/3676/3109/3112/4055/942/3122/23495/3600/10673/941/3586/3601/8741/940/3111/958/3108/3119/3115
KEGG_GLUTATHIONE_METABOLISM	KEGG_GLUTATHIONE_METABOLISM	45	0.478182	1.65886	0.00526947	0.0168986	0.00985037	4527	tags=49%, list=22%, signal=38%	51056/6241/2877/5226/2950/9446/6723/2941/79017/3418/2876/6240/2730/2954/4258/2539/2729/26873/2948/373156/2937/4953
KEGG_OOCYTE_MEIOSIS	KEGG_OOCYTE_MEIOSIS	110	0.368698	1.48491	0.00543295	0.0171276	0.00998384	2893	tags=28%, list=14%, signal=24%	891/991/9232/983/9133/4085/6790/898/699/5515/10971/9134/810/51434/23291/5499/9700/9978/6195/5347/9088/10459/26271/8454/5519/51806/51529/7534/1017/995/109
KEGG_NUCLEOTIDE_EXCISION_REPAIR	KEGG_NUCLEOTIDE_EXCISION_REPAIR	43	0.480973	1.64522	0.00660717	0.0202541	0.0118063	5193	tags=53%, list=25%, signal=40%	5427/5111/6119/56655/54107/5425/9978/5982/5983/1069/1022/57804/1161/902/2067/5984/10714/6117/5424/5985/3978/2965/2074
KEGG_CHEMOKINE_SIGNALING_PATHWAY	KEGG_CHEMOKINE_SIGNALING_PATHWAY	180	0.334295	1.43623	0.00664248	0.0202541	0.0118063	3933	tags=33%, list=19%, signal=27%	3579/6772/6364/7852/1236/2919/10563/2920/58191/3627/10663/3576/6362/6351/6367/4283/6774/2787/3718/4790/6347/4067/1445/6464/3055/6355/5880/6354/6363/1234/2773/2921/6773/3265/8517/6372/6373/3702/8976/5293/5296/6352/109/6375/1230/1147/10681/408/5580/729230/4793/6361/5331/7454/1794/2793/2931/5604/7409
KEGG_CALCIUM_SIGNALING_PATHWAY	KEGG_CALCIUM_SIGNALING_PATHWAY	174	-0.293943	-1.35866	0.00739328	0.0221798	0.0129288	4469	tags=32%, list=21%, signal=26%	5256/1131/5533/5260/5567/552/5136/2776/1128/4842/887/2065/805/10800/2066/489/5159/2778/8912/6263/683/490/23236/3973/2149/5578/2774/115/153/6869/1956/196883/5027/5532/7125/3707/818/2767/5737/6546/5023/5579/5332/148/291/493/5350/4638/3710/7220/7134/185/5156/154/108/63928
KEGG_PENTOSE_PHOSPHATE_PATHWAY	KEGG_PENTOSE_PHOSPHATE_PATHWAY	26	0.539	1.65875	0.00805881	0.0237927	0.013869	4085	tags=46%, list=20%, signal=37%	55276/5226/226/6888/2821/64080/25796/5214/2539/51071/5634/7086
KEGG_TGF_BETA_SIGNALING_PATHWAY	KEGG_TGF_BETA_SIGNALING_PATHWAY	84	-0.355768	-1.45654	0.00818947	0.0238007	0.0138736	4040	tags=37%, list=19%, signal=30%	7042/57154/93/650/5308/654/5516/130399/652/7058/7059/9241/94/1387/64750/657/151449/4093/9475/4090/658/4088/5594/7048/6667/655/1634/5934/3625/10468/3400
KEGG_AMINO_SUGAR_AND_NUCLEOTIDE_SUGAR_METABOLISM	KEGG_AMINO_SUGAR_AND_NUCLEOTIDE_SUGAR_METABOLISM	44	0.467837	1.60812	0.0087893	0.0251509	0.0146607	2456	tags=34%, list=12%, signal=30%	55276/3099/2582/29925/7264/5373/55907/2821/64841/54187/2584/4351/55577/80896/10007
KEGG_GALACTOSE_METABOLISM	KEGG_GALACTOSE_METABOLISM	26	0.532077	1.63745	0.00953521	0.026872	0.0156639	5534	tags=50%, list=27%, signal=37%	55276/3099/2582/2584/2595/2717/5214/2538/3101/2585/3906/57818/2720
KEGG_NON_HOMOLOGOUS_END_JOINING	KEGG_NON_HOMOLOGOUS_END_JOINING	13	0.655617	1.69218	0.00980409	0.0272173	0.0158652	3666	tags=54%, list=18%, signal=44%	2237/2547/7520/5591/7518/3981/10111
KEGG_NOTCH_SIGNALING_PATHWAY	KEGG_NOTCH_SIGNALING_PATHWAY	47	-0.426375	-1.58012	0.0117276	0.0320785	0.0186988	5934	tags=62%, list=28%, signal=44%	9794/1487/196403/4855/8850/5986/28514/2033/55534/8650/1855/1857/2648/4854/3280/1840/9541/182/23220/22938/1856/3714/1387/3516/9253/3955/9612/4853/84441
KEGG_JAK_STAT_SIGNALING_PATHWAY	KEGG_JAK_STAT_SIGNALING_PATHWAY	153	0.327824	1.38806	0.0119313	0.0321627	0.0187479	4293	tags=33%, list=21%, signal=26%	6772/3566/10379/9021/9180/29949/3595/50604/3459/6774/3718/3458/55801/1438/4609/8651/23624/8027/3593/50615/1439/3575/3569/11009/51561/5292/894/3561/6773/3559/5293/3597/9063/85480/5296/3460/3594/50616/3455/3600/896/3587/58985/3586/3601/1154/64109/2056/1441/23533
KEGG_TIGHT_JUNCTION	KEGG_TIGHT_JUNCTION	131	-0.299883	-1.33872	0.0136935	0.0363856	0.0212095	3554	tags=29%, list=17%, signal=24%	5728/5516/5581/57530/8777/1365/58494/1459/5010/10398/93643/22808/5578/84552/7122/1495/4621/6237/51776/2037/6709/2035/154810/10000/5865/5521/5579/79784/56288/9223/9863/4628/2770/9073/4629/83700/137075/9076
KEGG_ENDOMETRIAL_CANCER	KEGG_ENDOMETRIAL_CANCER	52	-0.405129	-1.54047	0.0142991	0.0374595	0.0218355	4691	tags=44%, list=22%, signal=34%	5170/4893/1499/324/3611/5290/6654/5728/6655/1950/1495/1956/2309/5291/2932/10000/673/5594/83439/5295/6934/8313/595
KEGG_CYSTEINE_AND_METHIONINE_METABOLISM	KEGG_CYSTEINE_AND_METHIONINE_METABOLISM	33	0.485529	1.56892	0.0150354	0.0388414	0.022641	1591	tags=27%, list=8%, signal=25%	2806/2805/191/259307/6723/1786/3939/1789/55256
KEGG_N_GLYCAN_BIOSYNTHESIS	KEGG_N_GLYCAN_BIOSYNTHESIS	45	0.44791	1.55384	0.0191219	0.0487214	0.0284002	4935	tags=53%, list=24%, signal=41%	1798/10195/56052/199857/85365/91869/79053/7991/79868/29880/6184/29929/1650/8818/57171/84920/6185/8813/201595/1603/4249/8703/146664/79087
